# Supplementary material
Source: publisher figshare collection journal article supplement (https://gsapubs.figshare.com/ndownloader/files/27561401)
Supplement: Supplementary file 1 [file 27561401]

## Sheet: G48711
Turnbull, R.E., et al., 2021, A hidden Rodinian lithospheric keel beneath Zealandia, Earth’s newly recognized continent: Geology, v. 49, https://doi.org/10.1130/G48711.1

## Sheet: S1. Oxygen Isotopes - unknowns
File			I_p	16O/Coeff		18O/16O			start			18O/16O	δ18O	1 se (‰)	linear drift
			nA	L'2	1 rse (%)	H1/L'2	1 rse (%)	date	time	-x (µm)	y (µm)	corr.			correction
2018-11-05
OU50089@01			1.83312	2336366000	0.0189875	0.00202137	0.00807171	2018-11-05	11:47:00	3481	1967	0.00201736	6.11598	0.0807171	0.0505089
OU50089@2			1.83077	2327973000	0.0234818	0.00202114	0.0106872	2018-11-05	11:50:00	3252	2087	0.00201713	5.99754	0.106872	0.0470364
OU50089@3			1.82929	2315163000	0.0309699	0.00202075	0.00647498	2018-11-05	11:53:00	3356	2295	0.00201674	5.80045	0.0647498	0.043564
OU50089@4			1.82522	2317601000	0.0332155	0.00202085	0.00682954	2018-11-05	11:57:00	3447	2399	0.00201684	5.8436	0.0682954	0.038934
OU50089@5			1.82029	2291140000	0.0256169	0.0020208	0.00900492	2018-11-05	12:00:00	3610	2408	0.00201679	5.81475	0.0900492	0.0354615
OU50089@6			1.81685	2255844000	0.0318291	0.00202017	0.00766077	2018-11-05	12:03:00	3705	2563	0.00201617	5.5007	0.0766078	0.031989
OU50089@7			1.812	2310990000	0.0340017	0.00202114	0.00716679	2018-11-05	12:06:00	3777	1767	0.00201713	5.97752	0.0716679	0.0285165
OU50089@8			1.81059	2293668000	0.0351304	0.00202153	0.0103888	2018-11-05	12:10:00	3735	1956	0.00201752	6.167	0.103888	0.0238865
OU84922@01			1.80222	2312419000	0.018187	0.00201607	0.00665833	2018-11-05	12:13:00	1453	2056	0.00201207	3.44551	0.0665833	0.020414
OU84922@2			1.80136	2301358000	0.0264546	0.00201586	0.00641765	2018-11-05	12:16:00	1658	2558	0.00201186	3.33901	0.0641765	0.0169415
OU84922@3			1.7994	2302902000	0.0236674	0.00201597	0.00704277	2018-11-05	12:19:00	1642	2400	0.00201197	3.39178	0.0704277	0.013469
OU84922@4			1.79658	2283829000	0.0272969	0.00201655	0.00887152	2018-11-05	12:22:00	2082	2279	0.00201256	3.67798	0.0887152	0.00999656
OU84922@5			1.79322	2277203000	0.0288702	0.00201634	0.00761096	2018-11-05	12:26:00	2212	2472	0.00201234	3.56534	0.0761096	0.00536657
OU84922@6			1.79189	2278413000	0.0558834	0.00201659	0.0071462	2018-11-05	12:29:00	2104	2657	0.00201259	3.68729	0.071462	0.00189409
OU84922@7			1.78931	2269592000	0.029986	0.00201618	0.00649183	2018-11-05	12:32:00	2110	2879	0.00201218	3.48026	0.0649183	-0.0015784
OU84922@8			1.78493	2269384000	0.0287547	0.0020165	0.0103219	2018-11-05	12:35:00	1841	3265	0.0020125	3.63506	0.103219	-0.00505089
OU84922@9			1.7818	2243344000	0.0381216	0.00201665	0.0062745	2018-11-05	12:38:00	2003	3938	0.00201265	3.70823	0.062745	-0.00852338
OU84922@10			1.78039	2253876000	0.0324926	0.00201561	0.00823543	2018-11-05	12:41:00	1808	3779	0.00201161	3.18714	0.0823543	-0.0119959
P78002@01			1.77671	2265900000	0.0244064	0.00202619	0.00839012	2018-11-05	12:45:00	41	2629	0.00202217	8.44584	0.0839012	-0.0166259
P78002@2			1.7764	2256869000	0.0177986	0.00202631	0.00709555	2018-11-05	12:48:00	-194	2541	0.00202229	8.50259	0.0709555	-0.0200983
P78002@03			1.75888	2243567000	0.031162	0.00202604	0.00671659	2018-11-05	13:08:00	-13	2760	0.00202202	8.34406	0.0671659	-0.0432483
P78002@4			1.75927	2231079000	0.0270421	0.00202508	0.00739704	2018-11-05	13:11:00	-116	3034	0.00202106	7.86328	0.0739704	-0.0467208
P78002@5			1.75708	2218547000	0.0285512	0.00202622	0.00901679	2018-11-05	13:14:00	62	3523	0.0020222	8.42621	0.0901679	-0.0501933
P78002@6			1.75434	2217792000	0.0310826	0.00202656	0.00788196	2018-11-05	13:17:00	-109	3686	0.00202254	8.59245	0.0788196	-0.0536657
P78002@7			1.75113	2220076000	0.0307108	0.00202557	0.00585114	2018-11-05	13:20:00	-237	3848	0.00202155	8.09724	0.0585114	-0.0571382
P78002@8			1.75035	2204698000	0.0247613	0.00202616	0.0114255	2018-11-05	13:23:00	-518	4097	0.00202214	8.38792	0.114255	-0.0606107
OU49115@01			1.74769	2214806000	0.0290618	0.00201992	0.00529403	2018-11-05	13:27:00	-1870	2885	0.00201591	5.27606	0.0529403	-0.0652407
OU49115@2			1.74706	2225821000	0.0232607	0.00201944	0.00984387	2018-11-05	13:30:00	-1930	2531	0.00201544	5.03816	0.0984387	-0.0687132
OU49115@3			1.74487	2234685000	0.0205784	0.00201941	0.00887828	2018-11-05	13:33:00	-2262	2117	0.00201541	5.01826	0.0887828	-0.0721857
OU49115@4			1.74276	2234955000	0.0271669	0.00201925	0.0101277	2018-11-05	13:36:00	-2713	1957	0.00201525	4.93416	0.101277	-0.0756582
OU49115@5			1.74198	2238613000	0.0159845	0.00201939	0.00865319	2018-11-05	13:39:00	-2632	1606	0.00201539	5.00286	0.0865319	-0.0791307
P40375@01			1.73635	2238556000	0.0222944	0.00202247	0.00848909	2018-11-05	13:42:00	-2631	-530	0.00201846	6.53085	0.0848909	-0.0826032
P40375@2			1.7333	2242869000	0.0244096	0.00202372	0.0068335	2018-11-05	13:46:00	-2624	-754	0.00201971	7.14836	0.068335	-0.0872331
P40375@3			1.73212	2238974000	0.0258057	0.002023	0.00836721	2018-11-05	13:49:00	-2803	-828	0.00201899	6.78753	0.0836721	-0.0907056
P40375@4			1.73071	2236284000	0.0281363	0.00202222	0.0103939	2018-11-05	13:52:00	-2948	-636	0.00201821	6.39335	0.103939	-0.0941781
P40375@5			1.72766	2228599000	0.0130101	0.00202249	0.0103821	2018-11-05	13:55:00	-3274	-584	0.00201848	6.52576	0.103821	-0.0976506
P40375@6			1.72281	2223667000	0.0408098	0.00202311	0.00780778	2018-11-05	13:58:00	-3762	-553	0.0020191	6.82888	0.0780778	-0.101123
P40375@7			1.72109	2227420000	0.0277652	0.00202205	0.00899416	2018-11-05	14:01:00	-3673	-907	0.00201804	6.29633	0.0899416	-0.104596
P40375@8			1.71859	2221041000	0.0201883	0.00202245	0.00645685	2018-11-05	14:05:00	-3505	-912	0.00201844	6.49179	0.0645685	-0.109226
P40375@9			1.71796	2225707000	0.0242942	0.00202233	0.0099403	2018-11-05	14:08:00	-3299	-745	0.00201832	6.42958	0.099403	-0.112698
P45423@01			1.82029	2283848000	0.0301326	0.00202002	0.00752086	2018-11-05	15:27:00	5603	1756	0.00201596	5.36634	0.0752087
P45423@2			1.81849	2277178000	0.0377584	0.0020206	0.0059397	2018-11-05	15:30:00	5468	1710	0.00201654	5.65401	0.059397
P45423@3			1.81747	2288404000	0.0281754	0.00202057	0.00890242	2018-11-05	15:34:00	5236	1757	0.0020165	5.63759	0.0890242
P45423@4			1.81591	2296466000	0.0454527	0.00202019	0.00797647	2018-11-05	15:37:00	5077	1923	0.00201613	5.45145	0.0797647
P45423@5			1.81129	2286425000	0.0326684	0.00202018	0.00674194	2018-11-05	15:40:00	4726	1709	0.00201612	5.44697	0.0674194
P45423@6			1.81114	2286462000	0.0204981	0.00202057	0.00955435	2018-11-05	15:43:00	4593	1586	0.00201651	5.63809	0.0955435
P45423@7			1.81082	2283397000	0.0211126	0.00201991	0.00798214	2018-11-05	15:46:00	5087	1472	0.00201585	5.3106	0.0798214
P45423@8			1.80863	2262537000	0.0324554	0.00202064	0.00912906	2018-11-05	15:49:00	5266	1286	0.00201658	5.67492	0.0912906
P45423@9			1.80472	2274221000	0.0258371	0.00202043	0.00873215	2018-11-05	15:52:00	5567	1162	0.00201637	5.5699	0.0873215
OU85069@01			1.80081	2287138000	0.0281606	0.00201847	0.00659425	2018-11-05	15:55:00	5264	-821	0.00201441	4.59291	0.0659425
OU85069@2			1.8019	2286536000	0.024103	0.00201793	0.00606231	2018-11-05	15:58:00	5550	-938	0.00201387	4.32565	0.0606231
OU85069@3			1.80128	2284132000	0.0186152	0.00201775	0.0076967	2018-11-05	16:01:00	5651	-1072	0.00201369	4.23507	0.076967
OU85069@4			1.79784	2296910000	0.02425	0.00201783	0.00723246	2018-11-05	16:04:00	5798	-1230	0.00201378	4.27787	0.0723246
OU85069@5			1.79604	2284868000	0.0253382	0.00201785	0.00897026	2018-11-05	16:07:00	6228	-1135	0.00201379	4.28583	0.0897026
OU85069@6			1.79377	2271228000	0.0434692	0.00201932	0.00785395	2018-11-05	16:10:00	5979	-1381	0.00201526	5.01895	0.0785395
OU85069@7			1.78986	2282883000	0.0215987	0.00201798	0.00835027	2018-11-05	16:13:00	5628	-1543	0.00201393	4.35302	0.0835027
OU85069@8			1.78853	2298971000	0.0257074	0.00201828	0.00732314	2018-11-05	16:16:00	5010	-1631	0.00201422	4.49935	0.0732314
OU85069@9			1.789	2282746000	0.0356313	0.00201863	0.0116044	2018-11-05	16:20:00	5110	-1238	0.00201458	4.67553	0.116044
OU85069@10			1.78751	2281651000	0.0303995	0.00201899	0.00901062	2018-11-05	16:23:00	4919	-1321	0.00201493	4.85222	0.0901062
OU49153@01			1.78368	2315676000	0.0111091	0.00201981	0.00632678	2018-11-05	16:26:00	5050	-4572	0.00201575	5.25983	0.0632678
OU49153@2			1.7854	2318814000	0.0155423	0.00201959	0.0069945	2018-11-05	16:29:00	4297	-4299	0.00201553	5.15233	0.069945
OU49153@3			1.78141	2319473000	0.018583	0.00201947	0.00729285	2018-11-05	16:32:00	4067	-5025	0.00201541	5.09061	0.0729285
OU49153@4			1.77992	2319008000	0.0213874	0.00201965	0.0080366	2018-11-05	16:35:00	3766	-5098	0.00201559	5.1802	0.080366
OU49153@5			1.77984	2324854000	0.0133725	0.00201975	0.00809153	2018-11-05	16:38:00	3462	-5164	0.00201569	5.23196	0.0809153
OU49153@6			1.76185	2312394000	0.019242	0.00201979	0.00931379	2018-11-05	17:00:00	3866	-5783	0.00201573	5.25137	0.0931379
OU49153@7			1.76451	2311659000	0.0280535	0.00201968	0.00581558	2018-11-05	17:03:00	4528	-5498	0.00201562	5.19613	0.0581558
OU49153@8			1.76615	2307997000	0.0177982	0.0020194	0.00814991	2018-11-05	17:06:00	5029	-5350	0.00201534	5.05876	0.0814991
OU84955@01			1.76451	2286480000	0.0178691	0.00201881	0.00844663	2018-11-05	17:09:00	1949	-4299	0.00201475	4.76313	0.0844663
OU84955@2			1.76365	2294045000	0.0268586	0.00201848	0.00689091	2018-11-05	17:12:00	1941	-4493	0.00201443	4.60088	0.0689091
OU84955@3			1.76075	2286189000	0.026054	0.00201914	0.00690343	2018-11-05	17:15:00	2048	-4763	0.00201508	4.92787	0.0690343
OU84955@4			1.76381	2294723000	0.0237102	0.00201887	0.00855207	2018-11-05	17:18:00	1777	-4921	0.00201481	4.7915	0.0855207
OU84955@5			1.76381	2286817000	0.0139417	0.00201886	0.0101039	2018-11-05	17:21:00	1575	-5087	0.0020148	4.78801	0.101039
OU84955@6			1.76099	2302205000	0.0206745	0.00201893	0.00756518	2018-11-05	17:24:00	1153	-5004	0.00201487	4.82136	0.0756518
OU84955@7			1.75974	2285278000	0.0362912	0.00201872	0.00776004	2018-11-05	17:27:00	1231	-5380	0.00201466	4.71684	0.0776003
OU84955@8			1.76623	2302198000	0.0119796	0.00201849	0.00949073	2018-11-05	17:30:00	863	-5161	0.00201443	4.60486	0.0949073
OU84955@9			1.76318	2308536000	0.025996	0.00201773	0.00981993	2018-11-05	17:33:00	556	-5368	0.00201367	4.22561	0.0981993
OU49124@01			1.75661	2298008000	0.0209259	0.00202633	0.00861057	2018-11-05	17:36:00	-1500	-5976	0.00202226	8.50634	0.0861057
OU49124@2			1.76099	2320032000	0.0429619	0.00202675	0.0102667	2018-11-05	17:39:00	-1934	-6062	0.00202268	8.71736	0.102667
OU49124@3			1.76701	2317695000	0.0299457	0.00202613	0.00761347	2018-11-05	17:42:00	-2109	-5803	0.00202205	8.4053	0.0761347
OU49124@4			1.76889	2306605000	0.014036	0.00202593	0.00638064	2018-11-05	17:45:00	-2127	-5248	0.00202185	8.30527	0.0638064
OU49124@5			1.76717	2295423000	0.0154642	0.00202604	0.00903479	2018-11-05	17:48:00	-2026	-5155	0.00202197	8.36399	0.0903479
OU49124@6			1.75082	2277657000	0.0123416	0.0020258	0.00665574	2018-11-05	17:51:00	-2150	-4906	0.00202172	8.24106	0.0665574
OU49124@7			1.74292	2187219000	0.0948276	0.00202814	0.00959798	2018-11-05	17:54:00	-2884	-4912	0.00202406	9.40767	0.0959798
OU49124@8			1.73963	2275238000	0.0227017	0.00202585	0.00560382	2018-11-05	17:57:00	-2834	-5181	0.00202178	8.26893	0.0560382
OU49124@9			1.73744	2274023000	0.0175654	0.00202524	0.00939144	2018-11-05	18:00:00	-2552	-5676	0.00202117	7.96185	0.0939144
OU49124@10			1.73627	2270890000	0.0211846	0.00202538	0.00613349	2018-11-05	18:03:00	-2401	-5405	0.00202131	8.03452	0.0613349
P75283@01			1.826	2281439000	0.00671045	0.00201708	0.00976995	2018-11-05	19:47:00	1817	-448	0.00201414	4.45651	0.0976995
P75283@2			1.82123	2273131000	0.0145079	0.0020171	0.00697982	2018-11-05	19:50:00	2103	-224	0.00201416	4.46746	0.0697982
P75283@3			1.81943	2271706000	0.00857662	0.00201721	0.00588388	2018-11-05	19:53:00	2341	-81	0.00201426	4.51726	0.0588388
P75283@4			1.81583	2263354000	0.0190257	0.00201729	0.00806989	2018-11-05	19:56:00	2547	332	0.00201434	4.5571	0.0806989
P75283@5			1.81356	2237294000	0.0147518	0.00201673	0.00695025	2018-11-05	19:59:00	2098	947	0.00201378	4.27873	0.0695025
P75283@6			1.81293	2251321000	0.0134509	0.00201667	0.0087339	2018-11-05	20:02:00	1857	1056	0.00201372	4.25134	0.087339
OU49118@01			1.80621	2279987000	0.013823	0.00202155	0.0087772	2018-11-05	20:05:00	4433	-1244	0.0020186	6.68196	0.087772
OU49118@2			1.80542	2279600000	0.0299176	0.00202143	0.00730503	2018-11-05	20:08:00	4581	-1154	0.00201848	6.6222	0.0730503
OU49118@3			1.803	2274417000	0.0516434	0.00202156	0.00828739	2018-11-05	20:11:00	4767	-1132	0.00201861	6.68793	0.0828739
OU49118@4			1.7987	2276340000	0.0149011	0.002022	0.00827616	2018-11-05	20:14:00	4533	-1589	0.00201904	6.90356	0.0827616
OU49118@5			1.79838	2280501000	0.0163207	0.00202278	0.00684677	2018-11-05	20:17:00	4454	-1929	0.00201982	7.29248	0.0684677
OU49118@6			1.79862	2264936000	0.0183931	0.00202272	0.00610242	2018-11-05	20:20:00	4275	-1926	0.00201976	7.2611	0.0610242
OU49118@7			1.79799	2283566000	0.0104915	0.00202248	0.00652204	2018-11-05	20:23:00	4673	-2084	0.00201952	7.14159	0.0652204
OU49118@8			1.80237	2277482000	0.016927	0.0020223	0.00695773	2018-11-05	20:26:00	4884	-2264	0.00201935	7.05594	0.0695773
P62078@01			1.79361	2289343000	0.0102095	0.00201809	0.00876017	2018-11-05	20:29:00	4366	-3826	0.00201514	4.95548	0.0876017
P62078@2			1.79275	2292576000	0.0217958	0.00201824	0.00813672	2018-11-05	20:32:00	4195	-3988	0.00201529	5.03117	0.0813672
P62078@3			1.79236	2288246000	0.0124283	0.00201789	0.00767152	2018-11-05	20:35:00	3520	-3940	0.00201494	4.85788	0.0767152
P62078@4			1.78986	2281082000	0.0155179	0.00201834	0.0084886	2018-11-05	20:37:00	3078	-3718	0.00201539	5.08097	0.084886
P62078@5			1.78688	2278566000	0.0118961	0.00201761	0.00792637	2018-11-05	20:40:00	3308	-3694	0.00201467	4.72143	0.0792637
P62078@6			1.78454	2277272000	0.014651	0.00201838	0.00833364	2018-11-05	20:43:00	4751	-3331	0.00201543	5.09989	0.0833364
P62455@01			1.78148	2228463000	0.126763	0.00201391	0.00770782	2018-11-05	20:47:00	1877	-4274	0.00201097	2.87693	0.0770782
P62455@2			1.77992	2270258000	0.0121711	0.00201547	0.0100758	2018-11-05	20:49:00	2276	-4346	0.00201253	3.65527	0.100758
P62455@3			1.76991	2265119000	0.0100529	0.0020155	0.00678743	2018-11-05	21:11:00	2133	-4656	0.00201255	3.66672	0.0678743
P62455@4			1.76764	2274825000	0.0763436	0.0020148	0.00668311	2018-11-05	21:14:00	2433	-4987	0.00201185	3.31814	0.0668311
P62455@5			1.766	2266741000	0.0240852	0.00201621	0.0086873	2018-11-05	21:17:00	2298	-5116	0.00201326	4.01929	0.086873
P62455@6			1.76553	2255686000	0.0183017	0.00201544	0.0107104	2018-11-05	21:20:00	1879	-5241	0.0020125	3.64083	0.107104
P62455@7			1.76381	2256707000	0.0163936	0.00201586	0.0081323	2018-11-05	21:23:00	1829	-5166	0.00201292	3.84848	0.081323
P62455@8			1.76138	2257945000	0.0122942	0.00201596	0.00886673	2018-11-05	21:26:00	1902	-5571	0.00201301	3.89728	0.0886673
OU49126@01			1.76044	2119452000	0.112723	0.00201999	0.00874339	2018-11-05	21:29:00	57	-4326	0.00201704	5.90611	0.0874339
OU49126@2			1.75809	2224003000	0.0113458	0.00201612	0.00878465	2018-11-05	21:32:00	40	-4128	0.00201317	3.97696	0.0878465
OU49126@3			1.75708	2229198000	0.0108769	0.00201642	0.00737676	2018-11-05	21:35:00	357	-4294	0.00201347	4.12386	0.0737676
OU49126@4			1.75497	2227683000	0.00700061	0.00201622	0.00976898	2018-11-05	21:38:00	381	-4446	0.00201327	4.02427	0.0976898
OU49126@5			1.75012	2225604000	0.0100288	0.0020165	0.00910447	2018-11-05	21:41:00	758	-4140	0.00201356	4.16669	0.0910447
OU49126@6			1.75012	2218101000	0.0186638	0.00201635	0.0100894	2018-11-05	21:44:00	881	-4105	0.00201341	4.09199	0.100894
OU49126@7			1.74964	2231623000	0.0102723	0.00201607	0.00906851	2018-11-05	21:47:00	783	-5066	0.00201313	3.95355	0.0906851
OU49126@8			1.74855	2226711000	0.0152719	0.00201626	0.00528463	2018-11-05	21:50:00	26	-5116	0.00201331	4.04518	0.0528463
OU49230@01			1.74777	2178070000	0.0104267	0.00201593	0.00696923	2018-11-05	21:53:00	-1538	-2521	0.00201299	3.88434	0.0696923
OU49230@2			1.74495	2187900000	0.0207473	0.00201698	0.00956073	2018-11-05	21:56:00	-1351	-2888	0.00201404	4.40721	0.0956073
OU49230@3			1.74824	2176821000	0.0198218	0.00201595	0.00944132	2018-11-05	21:59:00	-1230	-2906	0.002013	3.89131	0.0944132
OU49230@4			1.74832	2190066000	0.0181887	0.00201617	0.00636787	2018-11-05	22:02:00	-1186	-3106	0.00201323	4.00285	0.0636787
OU49230@5			1.7455	2192213000	0.0292564	0.00201664	0.00647906	2018-11-05	22:05:00	-1150	-3404	0.0020137	4.2369	0.0647906
OU49230@6			1.74245	2187189000	0.019221	0.00201621	0.00938383	2018-11-05	22:08:00	-1307	-3700	0.00201327	4.02227	0.0938383
OU49230@7			1.73971	2186604000	0.01086	0.00201641	0.00927604	2018-11-05	22:11:00	-1176	-3730	0.00201346	4.11888	0.0927604
OU49230@8			1.73916	2193816000	0.0245528	0.00201643	0.00701493	2018-11-05	22:14:00	-871	-3976	0.00201349	4.13282	0.0701493
OU49230@9			1.72758	2181035000	0.0157775	0.00201669	0.00890067	2018-11-05	22:35:00	-865	-4178	0.00201375	4.2623	0.0890067
OU49230@10			1.72727	2186170000	0.0155455	0.00201628	0.00777269	2018-11-05	22:38:00	-1088	-4277	0.00201334	4.05763	0.0777269
OU49211@01			1.72516	2164697000	0.00998216	0.00201749	0.00839945	2018-11-05	22:41:00	-2778	-4103	0.00201455	4.66167	0.0839945
OU49211@2			1.72492	2165655000	0.00700693	0.00201745	0.00904217	2018-11-05	22:44:00	-2848	-4259	0.00201451	4.64126	0.0904217
OU49211@3			1.72148	2170602000	0.00887463	0.00201762	0.00960822	2018-11-05	22:47:00	-2768	-4571	0.00201467	4.72442	0.0960822
OU49211@4			1.7214	2161110000	0.0126738	0.00201737	0.0110422	2018-11-05	22:50:00	-3066	-4469	0.00201442	4.59993	0.110422
OU49211@5			1.71992	2136923000	0.0130286	0.00201764	0.00885538	2018-11-05	22:53:00	-3105	-4113	0.00201469	4.73438	0.0885538
OU49211@6			1.7182	2106573000	0.0325928	0.00201712	0.00741431	2018-11-05	22:56:00	-3532	-4038	0.00201417	4.47493	0.0741431
OU49211@7			1.71757	2133863000	0.00740428	0.00201707	0.00961151	2018-11-05	22:59:00	-3849	-3785	0.00201412	4.44804	0.0961151
P75290@01			1.71335	2112196000	0.0166812	0.00201581	0.00835745	2018-11-05	23:02:00	-3853	-1713	0.00201287	3.82408	0.0835745
P75290@2			1.71225	2109562000	0.0184644	0.00201582	0.0113425	2018-11-05	23:05:00	-3617	-1552	0.00201288	3.82757	0.113425
P75290@3			1.71092	2103643000	0.0208606	0.00201602	0.00890924	2018-11-05	23:08:00	-3821	-1342	0.00201307	3.92517	0.0890924
P75290@4			1.7092	2097822000	0.0154583	0.0020157	0.0100223	2018-11-05	23:11:00	-3789	-1095	0.00201276	3.7693	0.100223
P75290@5			1.70951	2088256000	0.0259831	0.00201601	0.00900748	2018-11-05	23:14:00	-3943	-1080	0.00201306	3.92119	0.0900748
P75290@6			1.70607	2096695000	0.0163896	0.0020159	0.00624075	2018-11-05	23:17:00	-3516	-952	0.00201295	3.86591	0.0624075
P75293@01			1.70521	2099796000	0.0221918	0.0020164	0.0104049	2018-11-05	23:20:00	-1679	334	0.00201345	4.11639	0.104049
P75293@2			1.70396	2092112000	0.0386551	0.00201643	0.00940719	2018-11-05	23:23:00	-1519	651	0.00201348	4.13083	0.0940719
P75293@3			1.7031	2094215000	0.0181393	0.00201603	0.0104175	2018-11-05	23:26:00	-1816	1027	0.00201309	3.93264	0.104175
P75293@4			1.70138	2036171000	0.0448336	0.00201624	0.0101866	2018-11-05	23:28:00	-1938	1194	0.0020133	4.03871	0.101866
P75293@5			1.70036	2070093000	0.0221471	0.00201596	0.00871627	2018-11-05	23:31:00	-2116	1156	0.00201301	3.89678	0.0871627
P75293@6			1.69965	2069272000	0.0124279	0.00201525	0.00680633	2018-11-05	23:34:00	-2388	1273	0.0020123	3.54123	0.0680633
P75293@7			1.69825	2069276000	0.0313442	0.00201679	0.00788493	2018-11-05	23:37:00	-1631	1448	0.00201384	4.3101	0.0788493
2018-11-06
P70217@01			1.79956	2336088000	0.034763	0.00202735	0.00695449	2018-11-06	09:28:00	2315	3088	0.00202359	9.22274	0.0695449	0.0502936
P70217@2			1.79682	2347239000	0.03379	0.00202785	0.00954657	2018-11-06	09:31:00	2372	2863	0.00202409	9.46687	0.0954657	0.0465294
P70217@3			1.78907	2331296000	0.0312264	0.00202728	0.00709598	2018-11-06	09:33:00	2697	2668	0.00202352	9.17813	0.0709598	0.0440199
P70217@4			1.78595	2325832000	0.0282634	0.00202712	0.00702522	2018-11-06	09:36:00	1901	2718	0.00202336	9.09622	0.0702522	0.0402558
P70217@5			1.78274	2338984000	0.0242215	0.00202785	0.00683644	2018-11-06	09:39:00	2105	2433	0.00202409	9.45484	0.0683644	0.0364916
P70217@6			1.77836	2318521000	0.0263014	0.00202687	0.0105711	2018-11-06	09:42:00	1926	2125	0.00202311	8.96325	0.105711	0.0327274
P70217@7			1.77906	2323723000	0.01953	0.00202761	0.00736709	2018-11-06	09:45:00	1956	2007	0.00202385	9.33083	0.0736709	0.0289632
P70217@8			1.77053	2327031000	0.0266845	0.00202815	0.00784319	2018-11-06	09:48:00	2251	2130	0.00202439	9.59338	0.0784319	0.0251991
P70217@9			1.77124	2314521000	0.0201373	0.00202819	0.00859593	2018-11-06	09:50:00	2413	1886	0.00202443	9.61078	0.0859593	0.0226896
P70217@10			1.76388	2297406000	0.0350423	0.00202669	0.00761706	2018-11-06	09:53:00	2324	1622	0.00202293	8.85985	0.0761706	0.0189254
P89666@01			1.75739	2291067000	0.0234944	0.00202029	0.0078116	2018-11-06	09:56:00	438	2227	0.00201655	5.67329	0.078116	0.0151613
P89666@2			1.75356	2274788000	0.0287814	0.00202027	0.0112486	2018-11-06	09:59:00	72	2183	0.00201652	5.65907	0.112486	0.0113971
P89666@3			1.75043	2258531000	0.0302859	0.00201952	0.00706058	2018-11-06	10:02:00	-226	2367	0.00201578	5.28197	0.0706058	0.00763291
P89666@4			1.74628	2260909000	0.0225378	0.00201981	0.00701454	2018-11-06	10:05:00	-228	3056	0.00201606	5.42207	0.0701454	0.00386873
P89666@5			1.74409	2257488000	0.0364955	0.00201975	0.00894562	2018-11-06	10:08:00	-20	3239	0.00201601	5.38943	0.0894562	0.00010456
P89666@6			1.74347	2255448000	0.0263961	0.00201965	0.00913416	2018-11-06	10:10:00	89	3358	0.0020159	5.33416	0.0913416	-0.00240489
P89666@7			1.73893	2259384000	0.0277202	0.00202311	0.00805836	2018-11-06	10:13:00	671	3161	0.00201935	7.05271	0.0805836	-0.00616906
P89666@8			1.73533	2255392000	0.0364158	0.00201999	0.008021	2018-11-06	10:16:00	812	3349	0.00201625	5.49936	0.08021	-0.00993324
P89666@9			1.73071	2235502000	0.0308046	0.00202025	0.0101726	2018-11-06	10:19:00	654	3516	0.00201651	5.62452	0.101726	-0.0136974
P89666@10			1.7279	2245004000	0.0293165	0.00202009	0.00854682	2018-11-06	10:22:00	489	3519	0.00201634	5.53713	0.0854682	-0.0174616
P76448@01			1.70372	2220870000	0.0244274	0.00201827	0.0103145	2018-11-06	10:43:00	-1969	2151	0.00201453	4.60731	0.103145	-0.0438108
P76448@2			1.70208	2214480000	0.0212068	0.00201845	0.00971301	2018-11-06	10:46:00	-2027	2300	0.00201471	4.69464	0.0971301	-0.047575
P76448@3			1.70177	2204283000	0.0344102	0.00201776	0.00816576	2018-11-06	10:49:00	-2086	2542	0.00201401	4.34442	0.0816576	-0.0513392
P76448@4			1.6995	2212014000	0.0239191	0.00201833	0.00648187	2018-11-06	10:51:00	-2416	2262	0.00201458	4.62615	0.0648187	-0.0538486
P76448@5			1.69942	2209053000	0.0467467	0.00201879	0.0092575	2018-11-06	10:54:00	-2368	1886	0.00201505	4.85285	0.092575	-0.0576128
P76448@6			1.69527	2218104000	0.0336949	0.00201789	0.00910203	2018-11-06	10:57:00	-2136	1647	0.00201415	4.40159	0.0910203	-0.061377
P76448@7			1.69574	2219862000	0.0280855	0.00201843	0.00722051	2018-11-06	11:00:00	-1787	1450	0.00201469	4.66612	0.0722051	-0.0651411
P76448@8			1.69402	2209309000	0.0283711	0.00201829	0.0100452	2018-11-06	11:03:00	-1680	1637	0.00201455	4.59168	0.100452	-0.0689053
P76448@9			1.69175	2203748000	0.0293378	0.00201834	0.00607215	2018-11-06	11:06:00	-1712	1867	0.00201459	4.6118	0.0607215	-0.0726695
P76448@10			1.68886	2204615000	0.0273836	0.0020183	0.00822531	2018-11-06	11:09:00	-1971	1866	0.00201456	4.58912	0.0822531	-0.0764337
OU49137@01			1.68604	2196598000	0.0148528	0.00201767	0.010755	2018-11-06	11:11:00	-2283	47	0.00201392	4.27152	0.10755	-0.0789431
OU49137@2			1.68471	2191665000	0.0276616	0.00201736	0.00666845	2018-11-06	11:14:00	-2553	-104	0.00201362	4.11643	0.0666845	-0.0827073
OU49137@3			1.68276	2188475000	0.017139	0.00201747	0.00856005	2018-11-06	11:17:00	-2835	5	0.00201373	4.16892	0.0856005	-0.0864715
OU49137@4			1.68135	2184521000	0.017961	0.00201702	0.00864185	2018-11-06	11:20:00	-2976	-370	0.00201328	3.94016	0.0864185	-0.0902356
OU49137@5			1.67611	2177988000	0.028091	0.00201791	0.00673656	2018-11-06	11:23:00	-2438	-328	0.00201416	4.37643	0.0673656	-0.0939998
OU49137@6			1.67415	2189959000	0.0195178	0.00201876	0.0103171	2018-11-06	11:26:00	-2024	-779	0.00201501	4.79578	0.103171	-0.097764
P89655@01			1.67274	2198922000	0.0189898	0.00202025	0.00904359	2018-11-06	11:29:00	-2310	-3309	0.00201651	5.53768	0.0904359	-0.101528
P89655@2			1.67157	2191778000	0.0226251	0.00201927	0.00553484	2018-11-06	11:31:00	-2712	-3215	0.00201552	5.04437	0.0553484	-0.104038
P89655@3			1.66907	2184452000	0.0198751	0.00202019	0.00736399	2018-11-06	11:34:00	-2930	-3043	0.00201645	5.50105	0.0736399	-0.107802
P89655@4			1.66484	2176100000	0.0208506	0.00201989	0.0119889	2018-11-06	11:37:00	-3262	-3161	0.00201614	5.34646	0.119889	-0.111566
P89655@5			1.87286	2450613000	0.0296196	0.00201947	0.00876738	2018-11-06	13:11:00	-2106	-3119	0.00201568	5.22524	0.0876738
P89655@6			1.87396	2451396000	0.0216006	0.00202034	0.00712649	2018-11-06	13:14:00	-1862	-3145	0.00201655	5.65879	0.0712649
P89655@7			1.8684	2462194000	0.0632861	0.00202038	0.00848269	2018-11-06	13:16:00	-1451	-3658	0.00201658	5.67721	0.0848269
P89655@8			1.86371	2454490000	0.0210997	0.00201988	0.0071493	2018-11-06	13:19:00	-1924	-3791	0.00201609	5.43231	0.0714931
P57098@01			1.86214	2463560000	0.0319915	0.00201795	0.00833759	2018-11-06	13:22:00	343	-3794	0.00201416	4.46863	0.0833759
P57098@2			1.86449	2469043000	0.0243544	0.00201843	0.00638428	2018-11-06	13:25:00	540	-3977	0.00201464	4.71005	0.0638428
P57098@3			1.8641	2469498000	0.0288474	0.00201827	0.00874213	2018-11-06	13:28:00	5	-4176	0.00201448	4.62841	0.0874213
P57098@4			1.86238	2457673000	0.0326166	0.00201819	0.00898892	2018-11-06	13:31:00	152	-3999	0.00201441	4.59108	0.0898892
P57098@5			1.86199	2462947000	0.0269509	0.00201775	0.00827969	2018-11-06	13:33:00	-146	-4371	0.00201396	4.36858	0.0827969
P57098@6			1.86159	2464735000	0.0115588	0.00201829	0.00749807	2018-11-06	13:36:00	-27	-4999	0.0020145	4.63887	0.0749807
P57098@7			1.858	2455581000	0.0212704	0.00201795	0.00762089	2018-11-06	13:39:00	130	-5143	0.00201416	4.46763	0.0762089
P57098@8			1.85463	2457306000	0.0295892	0.00201963	0.00949269	2018-11-06	13:42:00	494	-5014	0.00201584	5.30538	0.0949269
P57098@9			1.85659	2445199000	0.0200108	0.00201875	0.00784183	2018-11-06	13:45:00	386	-4709	0.00201496	4.86933	0.0784183
P57098@10			1.8526	2446096000	0.0265765	0.00201961	0.00947092	2018-11-06	13:48:00	503	-4397	0.00201582	5.29741	0.0947092
P61003@01			1.84634	2470667000	0.0330158	0.00202427	0.00623908	2018-11-06	13:50:00	2560	-4034	0.00202047	7.61402	0.0623908
P61003@2			1.85189	2445579000	0.0289727	0.00202314	0.00819876	2018-11-06	13:53:00	2416	-3450	0.00201935	7.05453	0.0819876
P61003@3			1.85064	2446211000	0.020503	0.00202366	0.00762006	2018-11-06	13:56:00	2620	-3322	0.00201986	7.31187	0.0762006
P61003@4			1.84955	2461336000	0.0281567	0.00202424	0.00589578	2018-11-06	13:59:00	2990	-3391	0.00202044	7.60058	0.0589578
P61003@5			1.84305	2463236000	0.0233801	0.0020239	0.00689612	2018-11-06	14:02:00	3056	-3697	0.0020201	7.42935	0.0689612
P61003@6			1.84079	2458702000	0.0163523	0.00202456	0.00769287	2018-11-06	14:05:00	2908	-4327	0.00202076	7.75787	0.0769287
P61003@7			1.82334	2452324000	0.0171235	0.00202368	0.00905292	2018-11-06	14:23:00	2658	-4698	0.00201988	7.32133	0.0905292
P61003@8			1.82616	2447513000	0.0277205	0.00202414	0.00666595	2018-11-06	14:26:00	2436	-4683	0.00202034	7.5518	0.0666595
18NF575@01			1.82741	2438841000	0.0295855	0.00201889	0.00712307	2018-11-06	14:29:00	4824	-1574	0.0020151	4.93603	0.0712307
18NF575@2			1.83062	2432044000	0.031341	0.00201815	0.00783587	2018-11-06	14:31:00	4334	-1455	0.00201436	4.57017	0.0783587
18NF575@3			1.82725	2422168000	0.01644	0.00201714	0.00641238	2018-11-06	14:34:00	3535	-1298	0.00201335	4.06494	0.0641238
18NF575@4			1.82905	2431129000	0.028565	0.00201795	0.00587132	2018-11-06	14:37:00	4062	-1650	0.00201417	4.47112	0.0587132
18NF575@5			1.8267	2428950000	0.0226094	0.00201831	0.00987445	2018-11-06	14:40:00	4200	-1901	0.00201452	4.64783	0.0987445
18NF575@6			1.82623	2432608000	0.0215498	0.00201814	0.0097159	2018-11-06	14:43:00	4667	-1909	0.00201435	4.5647	0.097159
18NF575@7			1.82201	2438809000	0.0158772	0.00201785	0.00810398	2018-11-06	14:46:00	4405	-2578	0.00201407	4.42184	0.0810398
18NF575@8			1.81888	2425146000	0.0266039	0.00201827	0.00795314	2018-11-06	14:48:00	4249	-2559	0.00201448	4.62692	0.0795314
2018-11-07
P89652@02			1.66077	2136468000	0.0291123	0.00201805	0.008733	2018-11-07	10:15:00	3993	32	0.00201547	5.12402	0.08733	0.00470762
P89652@03			1.65538	2123945000	0.0172894	0.00201756	0.00940523	2018-11-07	10:18:00	4136	154	0.00201498	4.87489	0.0940523	-0.00235381
P89652@04			1.64779	2094224000	0.0128308	0.00201782	0.00614386	2018-11-07	10:21:00	3936	680	0.00201524	4.99733	0.0614386	-0.00941525
P89652@05			1.63848	2110430000	0.0176726	0.00201781	0.00806391	2018-11-07	10:24:00	4091	901	0.00201523	4.9833	0.0806391	-0.0164767
P89652@06			1.63097	2099404000	0.00972448	0.00201841	0.00771683	2018-11-07	10:27:00	4452	722	0.00201583	5.27657	0.0771683	-0.0235381
P89652@07			1.62612	2088331000	0.0173154	0.00201813	0.01026	2018-11-07	10:29:00	4306	1114	0.00201555	5.1329	0.1026	-0.0282457
P89652@08			1.6226	2081776000	0.0137988	0.00201863	0.00738878	2018-11-07	10:32:00	4522	1295	0.00201605	5.37487	0.0738878	-0.0353072
P89652@09			1.6147	2062241000	0.0123111	0.00201852	0.00798557	2018-11-07	10:35:00	4159	1390	0.00201593	5.30954	0.0798557	-0.0423686
P89652@10			1.60852	2053961000	0.017021	0.00201782	0.0095918	2018-11-07	10:38:00	3680	1272	0.00201523	4.95333	0.095918	-0.04943
P89652@11			1.60257	2037626000	0.0115487	0.00201732	0.00858816	2018-11-07	10:41:00	3572	1030	0.00201474	4.69873	0.0858816	-0.0564915
P89652@12			1.59498	2030666000	0.0165452	0.00201747	0.00871974	2018-11-07	10:44:00	3575	732	0.00201489	4.76987	0.0871974	-0.0635529
P89652@13			1.59099	2029922000	0.0148883	0.00201776	0.00691498	2018-11-07	10:47:00	3646	17	0.00201518	4.90475	0.0691498	-0.0706144
P57947@01			1.81622	2285613000	0.0279371	0.00202682	0.00889041	2018-11-07	12:11:00	1489	-370	0.00202404	9.39634	0.0889041
P57947@02			1.81254	2259046000	0.0265504	0.00202558	0.00526411	2018-11-07	12:14:00	1078	-327	0.0020228	8.7783	0.0526411
P57947@03			1.80738	2236242000	0.0476058	0.00202565	0.00701947	2018-11-07	12:17:00	1307	-174	0.00202288	8.81615	0.0701947
P57947@04			1.80237	2251821000	0.0430022	0.0020261	0.00617912	2018-11-07	12:20:00	1698	-129	0.00202332	9.03877	0.0617912
P57947@05			1.79924	2223065000	0.0425253	0.00202643	0.00826805	2018-11-07	12:23:00	1425	60	0.00202366	9.20411	0.0826805
P57947@06			1.79893	2239992000	0.0236325	0.00202571	0.00647744	2018-11-07	12:25:00	1762	658	0.00202294	8.84454	0.0647744
P57947@07			1.79502	2198813000	0.0750316	0.00202463	0.0106828	2018-11-07	12:28:00	1061	1021	0.00202186	8.30767	0.106828
P57947@08			1.79205	2189646000	0.0330378	0.00202484	0.00669078	2018-11-07	12:31:00	981	1219	0.00202207	8.41126	0.0669078
P57947@09			1.7897	2202678000	0.0316862	0.00202558	0.00705224	2018-11-07	12:34:00	1203	1355	0.0020228	8.7778	0.0705224
P57947@10			1.78814	2190093000	0.0391514	0.00202418	0.00588785	2018-11-07	12:37:00	1054	1510	0.00202141	8.08207	0.0588785
P57947@11			1.7854	2187633000	0.0240425	0.00202631	0.00623793	2018-11-07	12:40:00	1609	1696	0.00202353	9.14235	0.0623793
P57947@12			1.78031	2133658000	0.0500713	0.00202512	0.00862025	2018-11-07	12:42:00	1172	2809	0.00202235	8.5517	0.0862025
P57947@13			1.7771	2147245000	0.025945	0.00202454	0.00962859	2018-11-07	12:45:00	1325	2762	0.00202176	8.26086	0.0962859
P57947@14			1.77397	2154728000	0.0320173	0.00202531	0.00865046	2018-11-07	12:48:00	1339	2551	0.00202253	8.64384	0.0865046
P57930@01			1.77225	2089355000	0.050363	0.00202623	0.00820693	2018-11-07	12:51:00	-527	2678	0.00202345	9.10351	0.0820693
P57930@2			1.76975	2135145000	0.0262387	0.00202578	0.00740061	2018-11-07	12:54:00	-575	2466	0.00202301	8.8799	0.0740061
P57930@3			1.76905	2116676000	0.041275	0.00202567	0.00754305	2018-11-07	12:57:00	-696	2309	0.00202289	8.82312	0.0754305
P57930@4			1.76764	2103877000	0.0411557	0.00202563	0.0106978	2018-11-07	12:59:00	-832	2275	0.00202285	8.80221	0.106978
P57930@5			1.76341	2123250000	0.038102	0.00202614	0.0081284	2018-11-07	13:02:00	27	1606	0.00202336	9.05719	0.081284
P57930@6			1.76279	2140302000	0.0151384	0.00202541	0.00931134	2018-11-07	13:05:00	-791	1414	0.00202264	8.69513	0.0931134
P57930@7			1.83437	2357746000	0.0359211	0.00202696	0.00728751	2018-11-07	15:23:00	465	74	0.00202286	8.80791	0.0728751
P57930@8			1.83406	2328577000	0.0391788	0.00202637	0.00891424	2018-11-07	15:26:00	-17	46	0.00202227	8.51178	0.0891424
P57930@9			1.83147	2336854000	0.0427376	0.00202655	0.00869055	2018-11-07	15:29:00	-549	182	0.00202245	8.60286	0.0869055
P57930@10			1.82944	2333657000	0.0255757	0.002027	0.00917092	2018-11-07	15:33:00	-543	719	0.0020229	8.82732	0.0917092
P62510@01			1.82412	2314516000	0.0307131	0.00203131	0.00719181	2018-11-07	15:37:00	-1245	1133	0.0020272	10.9714	0.0719181
P62510@2			1.82248	2282855000	0.0393485	0.0020314	0.00597314	2018-11-07	15:40:00	-1978	1646	0.00202729	11.0182	0.0597314
P62510@3			1.82295	2284387000	0.0437049	0.00202808	0.00899262	2018-11-07	15:43:00	-2113	1454	0.00202398	9.36582	0.0899262
P62510@4			1.82146	2301038000	0.0326611	0.00202375	0.00715542	2018-11-07	15:46:00	-1501	870	0.00201966	7.20931	0.0715542
P62510@5			1.82146	2299272000	0.0249159	0.00202776	0.00950367	2018-11-07	15:49:00	-1246	540	0.00202366	9.20656	0.0950368
P62510@6			1.81872	2300055000	0.0569527	0.00202368	0.00874263	2018-11-07	15:53:00	-1317	243	0.00201958	7.17348	0.0874263
P62510@7			1.81638	2295268000	0.0336399	0.00202839	0.00809558	2018-11-07	15:56:00	-1995	444	0.00202428	9.51662	0.0809558
P62510@8			1.81677	2330302000	0.0270208	0.00202926	0.00794482	2018-11-07	16:00:00	-1406	-581	0.00202516	9.95211	0.0794482
P62510@9			1.81536	2318873000	0.0326483	0.00202853	0.00742249	2018-11-07	16:03:00	-1941	-822	0.00202443	9.58879	0.0742249
P62510@10			1.81121	2334098000	0.0301684	0.00202709	0.00739108	2018-11-07	16:06:00	-1609	-1109	0.00202298	8.86912	0.0739108
P89651@01			1.80996	2331932000	0.0273114	0.00202195	0.00904488	2018-11-07	16:09:00	-2744	-1279	0.00201786	6.31247	0.0904488
P89651@2			1.81067	2314662000	0.0298569	0.00202091	0.00850231	2018-11-07	16:12:00	-2837	-1120	0.00201682	5.79387	0.0850231
P89651@3			1.8055	2310783000	0.0450403	0.00202103	0.00810696	2018-11-07	16:22:00	-2992	-916	0.00201694	5.85509	0.0810696
P89651@4			1.80323	2300365000	0.0288213	0.00202129	0.00558648	2018-11-07	16:25:00	-2815	-813	0.0020172	5.98648	0.0558648
P89651@5			1.80128	2301747000	0.0194486	0.00202119	0.0081758	2018-11-07	16:29:00	-2644	-134	0.0020171	5.93472	0.081758
P89651@6			1.79995	2275168000	0.0442953	0.00202096	0.00661511	2018-11-07	16:32:00	-2737	212	0.00201687	5.81925	0.0661511
P89651@7			1.80089	2269607000	0.0276318	0.00202131	0.00914718	2018-11-07	16:35:00	-2555	1084	0.00201723	5.99693	0.0914718
P89651@8			1.79909	2244698000	0.0350371	0.00202092	0.00914036	2018-11-07	16:38:00	-2713	1480	0.00201683	5.80133	0.0914036
P52267@01			1.77734	2273746000	0.037484	0.0020292	0.00855694	2018-11-07	17:04:00	3404	-308	0.00202509	9.91926	0.0855694
P52267@2			1.7789	2265235000	0.0230941	0.00202999	0.00762118	2018-11-07	17:07:00	3205	-208	0.00202588	10.3154	0.0762118
P52267@3			1.77812	2282187000	0.0255652	0.00202824	0.0100092	2018-11-07	17:10:00	3154	162	0.00202414	9.44545	0.100092
P52267@4			1.77523	2262632000	0.034771	0.00202997	0.0077345	2018-11-07	17:14:00	3365	316	0.00202586	10.3055	0.077345
P52267@5			1.77617	2237886000	0.025788	0.00202949	0.00983099	2018-11-07	17:17:00	3161	636	0.00202538	10.0661	0.0983099
P52267@6			1.77085	2228366000	0.0376807	0.00202956	0.00529273	2018-11-07	17:20:00	3130	1087	0.00202545	10.1004	0.0529273
P52267@7			1.77241	2237696000	0.0366008	0.00202267	0.00807098	2018-11-07	17:23:00	3300	1285	0.00201858	6.67379	0.0807098
P52267@8			1.77108	2239707000	0.0382897	0.00202437	0.00902259	2018-11-07	17:26:00	3783	814	0.00202027	7.51639	0.0902259
P52267@9			1.76678	2227687000	0.0409307	0.00202934	0.00751411	2018-11-07	17:30:00	3738	427	0.00202523	9.99142	0.0751411
P52267@10			1.76873	2250660000	0.0170045	0.0020301	0.00841997	2018-11-07	17:33:00	3660	172	0.00202599	10.3687	0.0841997
P52267@11			1.76568	2254482000	0.0267763	0.0020277	0.00728852	2018-11-07	17:36:00	3653	-78	0.0020236	9.17769	0.0728852
P52267@12			1.76255	2271628000	0.0288057	0.00203027	0.00822928	2018-11-07	17:39:00	3110	-576	0.00202616	10.4548	0.0822928
OU49111@01			1.76083	2355330000	0.0130886	0.00202622	0.00916299	2018-11-07	17:43:00	2559	-6142	0.00202212	8.43862	0.0916299
OU49111@2			1.76005	2337226000	0.0204314	0.00202633	0.00523303	2018-11-07	17:46:00	2373	-5956	0.00202223	8.49237	0.0523303
OU49111@3			1.76052	2353875000	0.0224877	0.0020262	0.00773784	2018-11-07	17:49:00	2180	-6082	0.0020221	8.42966	0.0773784
OU49111@4			1.76099	2343068000	0.0337061	0.00202581	0.0105561	2018-11-07	17:52:00	2127	-5890	0.00202171	8.23506	0.105561
OU49111@5			1.75778	2342641000	0.0112706	0.00202665	0.00690906	2018-11-07	17:56:00	2601	-5666	0.00202255	8.65163	0.0690906
OU49111@6			1.75481	2329834000	0.0190241	0.00202584	0.0100561	2018-11-07	17:59:00	2735	-5176	0.00202174	8.248	0.100561
OU49111@7			1.75449	2322241000	0.0202039	0.00202505	0.00980677	2018-11-07	18:02:00	1671	-5120	0.00202095	7.85482	0.0980677
OU49111@8			1.75137	2336081000	0.0157343	0.00202501	0.00866761	2018-11-07	18:05:00	1374	-5678	0.00202091	7.83591	0.0866761
OU49111@9			1.75043	2345501000	0.00751987	0.00202617	0.00752833	2018-11-07	18:08:00	1280	-5884	0.00202207	8.41224	0.0752833
OU49111@10			1.74918	2342332000	0.016604	0.00202583	0.00707307	2018-11-07	18:11:00	1474	-6312	0.00202173	8.24203	0.0707307
P52247@01			1.74167	2308839000	0.0110902	0.00202722	0.00915746	2018-11-07	18:37:00	-631	-5163	0.00202311	8.93382	0.0915746
P52247@2			1.7401	2300748000	0.0246227	0.00202725	0.00697636	2018-11-07	18:40:00	-669	-4906	0.00202315	8.94925	0.0697636
P52247@3			1.73674	2284746000	0.025194	0.00202714	0.00722115	2018-11-07	18:45:00	-513	-4661	0.00202304	8.8965	0.0722115
P52247@4			1.73603	2277801000	0.0281381	0.00202668	0.00827927	2018-11-07	18:48:00	-210	-4546	0.00202258	8.66805	0.0827927
P52247@5			1.73361	2269529000	0.0200903	0.00202684	0.00794602	2018-11-07	18:51:00	86	-3908	0.00202274	8.74818	0.0794602
P52247@6			1.73298	2262400000	0.0241873	0.00202673	0.00672513	2018-11-07	18:54:00	-821	-3870	0.00202263	8.69443	0.0672513
P52247@7			1.73267	2309092000	0.00808951	0.00202758	0.00606708	2018-11-07	18:57:00	-511	-6090	0.00202348	9.11399	0.0606708
P52247@8			1.72993	2314265000	0.0212034	0.00202866	0.00516802	2018-11-07	19:00:00	15	-6691	0.00202456	9.65548	0.0516802
P52247@9			1.72821	2305928000	0.0138666	0.00202725	0.00829243	2018-11-07	19:03:00	374	-5991	0.00202315	8.95373	0.0829243
P52247@10			1.72633	2288732000	0.0152717	0.00202765	0.00760613	2018-11-07	19:07:00	372	-5273	0.00202355	9.15082	0.0760613
OU49117@01			1.7243	2237840000	0.0477776	0.00201868	0.0079556	2018-11-07	19:10:00	-2246	-2793	0.0020146	4.68799	0.079556
OU49117@2			1.72485	2214490000	0.01892	0.00202094	0.00575784	2018-11-07	19:13:00	-2475	-2582	0.00201685	5.81079	0.0575784
OU49117@3			1.72383	2236597000	0.01549	0.00201961	0.00813391	2018-11-07	19:17:00	-2643	-3374	0.00201552	5.14886	0.0813391
OU49117@4			1.72226	2248266000	0.0120237	0.00201962	0.00869293	2018-11-07	19:20:00	-2160	-3879	0.00201553	5.15334	0.0869293
OU49117@5			1.72344	2246822000	0.0280556	0.00201925	0.00845188	2018-11-07	19:23:00	-2413	-3826	0.00201516	4.96819	0.0845188
OU49117@6			1.72399	2262950000	0.0243307	0.00202011	0.0107713	2018-11-07	19:26:00	-2801	-4029	0.00201603	5.3987	0.107713
OU49117@7			1.72641	2227287000	0.0238208	0.00201906	0.00624137	2018-11-07	19:29:00	-2934	-3294	0.00201497	4.87413	0.0624137
OU49117@8			1.72289	2244130000	0.0172768	0.00202009	0.00761506	2018-11-07	19:32:00	-2207	-3023	0.002016	5.38825	0.0761506
OU49117@9			1.71749	2218290000	0.0257025	0.00202191	0.00688246	2018-11-07	19:35:00	-1860	-2995	0.00201782	6.29256	0.0688246
OU49117@10			1.71663	2230043000	0.0254734	0.00201908	0.00773243	2018-11-07	19:38:00	-1936	-2853	0.00201499	4.88359	0.0773243
2018-11-08
P77085@01			1.8465	2397099000	0.0126598	0.00201777	0.00669756	2018-11-08	10:41:00	2208	2841	0.00201503	4.90215	0.0669756
P77085@2			1.84563	2399280000	0.0435933	0.00201597	0.00698225	2018-11-08	10:44:00	2445	2720	0.00201324	4.0072	0.0698225
P77085@3			1.84251	2382707000	0.0345482	0.00200389	0.00727378	2018-11-08	10:47:00	1456	2807	0.00200117	-2.01145	0.0727378
P77085@4			1.83906	2379829000	0.0138543	0.00201859	0.00911416	2018-11-08	10:50:00	2393	2029	0.00201585	5.31003	0.0911416
P77085@5			1.83852	2359898000	0.0214842	0.00200647	0.00637742	2018-11-08	10:53:00	1920	1698	0.00200374	-0.727039	0.0637742
P77085@6			1.835	2346432000	0.0162551	0.00201037	0.00720853	2018-11-08	10:56:00	1809	1556	0.00200764	1.21775	0.0720853
P77085@7			1.83234	2331343000	0.0219182	0.00200835	0.0080256	2018-11-08	10:59:00	1599	1543	0.00200563	0.212238	0.080256
P77085@8			1.82842	2327981000	0.0175384	0.00201747	0.00770033	2018-11-08	11:02:00	1378	1433	0.00201473	4.75473	0.0770033
P77085@9			1.82905	2319328000	0.0206399	0.00201776	0.00926692	2018-11-08	11:06:00	1807	1068	0.00201502	4.89617	0.0926692
P77085@10			1.82576	2337868000	0.0160518	0.00200949	0.00905685	2018-11-08	11:09:00	2137	961	0.00200676	0.777	0.0905685
P77085@11			1.82154	2333390000	0.0191714	0.00199972	0.00758497	2018-11-08	11:12:00	1576	2290	0.00199701	-4.08573	0.0758497
P77085@12			1.82381	2340391000	0.0198432	0.00201751	0.00941909	2018-11-08	11:15:00	1339	2787	0.00201477	4.77017	0.0941909
P77085@13			1.82115	2359773000	0.0239914	0.00200918	0.0100351	2018-11-08	11:18:00	1600	2571	0.00200645	0.62311	0.100351
P77085@14			1.82005	2353654000	0.0252046	0.0020166	0.00918903	2018-11-08	11:21:00	2441	2563	0.00201386	4.32095	0.0918903
P52253@01			1.81677	2290701000	0.0156466	0.0020248	0.00923856	2018-11-08	11:25:00	-3118	2225	0.00202205	8.40427	0.0923856
P52253@2			1.81403	2285040000	0.0114008	0.00202578	0.00599217	2018-11-08	11:28:00	-3018	1939	0.00202303	8.89234	0.0599217
P52253@3			1.81333	2288468000	0.019362	0.0020263	0.00919659	2018-11-08	11:31:00	-3023	1466	0.00202355	9.14932	0.0919659
P52253@4			1.80621	2273473000	0.024578	0.00202428	0.00628385	2018-11-08	11:35:00	-3278	555	0.00202153	8.1438	0.0628385
P52253@5			1.80675	2255422000	0.0175181	0.00202485	0.0105907	2018-11-08	11:38:00	-3580	460	0.0020221	8.42768	0.105907
P52253@6			1.80715	2242482000	0.0131521	0.00202524	0.00892798	2018-11-08	11:41:00	-3870	410	0.00202249	8.62241	0.0892798
P52253@7			1.80261	2214653000	0.0211688	0.00202446	0.00913742	2018-11-08	11:44:00	-3883	-988	0.00202171	8.23195	0.0913742
P52253@8			1.80112	2203078000	0.018559	0.00202468	0.0082929	2018-11-08	11:48:00	-3125	-1149	0.00202193	8.34202	0.082929
P89318@01			1.78352	2258840000	0.024227	0.00202348	0.00686985	2018-11-08	12:13:00	-1029	-275	0.00202073	7.74688	0.0686985
P89318@2			1.78383	2267211000	0.0265554	0.00202385	0.0100105	2018-11-08	12:16:00	-1292	223	0.0020211	7.93015	0.100105
P89318@3			1.7825	2264313000	0.0151299	0.00202429	0.00896217	2018-11-08	12:20:00	-1039	489	0.00202154	8.15127	0.0896217
P89318@4			1.7836	2262934000	0.0172267	0.00202397	0.00822813	2018-11-08	12:23:00	-1694	1085	0.00202122	7.99091	0.0822813
P89318@5			1.78242	2246693000	0.0221808	0.00202362	0.00821442	2018-11-08	12:26:00	-2039	926	0.00202087	7.8151	0.0821442
P89318@6			1.78227	2246279000	0.0133976	0.002023	0.00683549	2018-11-08	12:29:00	-2489	589	0.00202025	7.50483	0.0683549
P89318@7			1.78062	2262975000	0.0155926	0.00202332	0.00831863	2018-11-08	12:32:00	-2090	1547	0.00202057	7.6642	0.0831863
P89318@8			1.7775	2258598000	0.0215303	0.00202359	0.00785201	2018-11-08	12:35:00	-2438	1388	0.00202084	7.79917	0.0785201
P89318@9			1.77656	2265140000	0.0204456	0.00202408	0.0063847	2018-11-08	12:39:00	-1143	1712	0.00202133	8.0432	0.063847
P89318@10			1.77554	2271246000	0.0140389	0.00202027	0.0073717	2018-11-08	12:42:00	-1805	2204	0.00201753	6.14871	0.073717
P89318@11			1.77038	2256649000	0.0150457	0.00202434	0.00913458	2018-11-08	12:45:00	-1124	1490	0.00202159	8.17219	0.0913458
OU50098@01			1.76975	2248637000	0.0170033	0.00202406	0.00926432	2018-11-08	12:50:00	483	-736	0.00202131	8.03274	0.0926432
OU50098@2			1.77147	2257327000	0.0218463	0.00202785	0.00523385	2018-11-08	12:53:00	568	-204	0.00202509	9.92126	0.0523385
OU50098@3			1.77022	2247521000	0.0224422	0.0020279	0.00683339	2018-11-08	12:56:00	-450	787	0.00202515	9.94666	0.0683339
OU50098@4			1.77742	2292280000	0.0380386	0.00202184	0.00888963	2018-11-08	12:59:00	354	1320	0.0020191	6.92961	0.0888963
OU50098@5			1.78759	2310059000	0.0101238	0.00202764	0.00619481	2018-11-08	13:02:00	740	1403	0.00202488	9.81667	0.0619481
OU50098@6			1.78501	2265906000	0.0115792	0.00202842	0.0108134	2018-11-08	13:05:00	503	1608	0.00202567	10.2066	0.108134
OU50098@7			1.77155	2260001000	0.0170849	0.00202917	0.00754943	2018-11-08	13:09:00	697	1773	0.00202641	10.5791	0.0754943
OU50098@8			1.76889	2279269000	0.0150319	0.00202876	0.00728997	2018-11-08	13:12:00	810	2037	0.00202601	10.376	0.0728997
OU50098@9			1.76568	2299699000	0.0201886	0.00202829	0.0074296	2018-11-08	13:15:00	580	2500	0.00202554	10.1439	0.074296
OU50098@10			1.76537	2262223000	0.0236076	0.00202967	0.00839838	2018-11-08	13:18:00	36	2415	0.00202691	10.8277	0.0839838
P45394@01			1.87129	2367298000	0.0373693	0.00202618	0.007171	2018-11-08	14:16:00	2898	-2289	0.00202364	9.19613	0.07171
P45394@2			1.87051	2376804000	0.0161487	0.00202627	0.0078723	2018-11-08	14:19:00	2894	-1960	0.00202373	9.24046	0.078723
P45394@3			1.872	2357522000	0.0183072	0.00202727	0.0082418	2018-11-08	14:22:00	3268	-2214	0.00202473	9.73854	0.082418
P45394@4			1.87161	2336943000	0.023069	0.00202597	0.00841274	2018-11-08	14:25:00	3110	-2377	0.00202343	9.09253	0.0841274
P45394@5			1.86793	2364929000	0.01676	0.00202626	0.00668182	2018-11-08	14:28:00	3916	-2294	0.00202372	9.23846	0.0668182
P45394@6			1.86652	2370106000	0.0202315	0.00202704	0.0110547	2018-11-08	14:31:00	4041	-2421	0.0020245	9.62597	0.110547
P45394@7			1.86316	2381561000	0.01921	0.00202691	0.0074609	2018-11-08	14:35:00	4629	-1602	0.00202437	9.55873	0.074609
P45394@8			1.86543	2374517000	0.0159421	0.00202687	0.00763706	2018-11-08	14:38:00	5315	-1751	0.00202433	9.5403	0.0763706
P45394@9			1.86261	2362788000	0.0269811	0.00202757	0.00875393	2018-11-08	14:41:00	5472	-1954	0.00202503	9.88995	0.0875393
P45394@10			1.86003	2346168000	0.0262852	0.00202676	0.00860239	2018-11-08	14:44:00	4970	-2563	0.00202422	9.48651	0.0860239
P45394@11			1.85557	2328028000	0.0212604	0.00202739	0.00726903	2018-11-08	14:47:00	5006	-2947	0.00202485	9.7988	0.0726903
P45394@12			1.85236	2314330000	0.0216264	0.00202592	0.00553407	2018-11-08	14:50:00	4358	-2956	0.00202338	9.06762	0.0553407
P64999@01			1.85197	2326884000	0.0244827	0.00202681	0.00799786	2018-11-08	14:54:00	1504	-4413	0.00202427	9.50892	0.0799786
P64999@2			1.85056	2308696000	0.0150958	0.00202544	0.00662804	2018-11-08	14:57:00	1106	-4879	0.0020229	8.82755	0.0662804
P64999@3			1.84665	2232812000	0.0176379	0.00202515	0.00728696	2018-11-08	15:01:00	512	-6224	0.00202262	8.6851	0.0728696
P64999@4			1.84931	2227063000	0.0180216	0.00202487	0.00662243	2018-11-08	15:04:00	553	-6393	0.00202234	8.54564	0.0662243
P64999@5			1.84908	2233135000	0.0325085	0.00202469	0.00630887	2018-11-08	15:07:00	165	-6138	0.00202215	8.45449	0.0630887
P64999@6			1.849	2271736000	0.0242397	0.00202594	0.00836031	2018-11-08	15:10:00	430	-5331	0.0020234	9.07759	0.0836031
P64999@7			1.84415	2280544000	0.0184819	0.00202519	0.00730663	2018-11-08	15:13:00	-77	-4348	0.00202265	8.70353	0.0730663
P64999@8			1.8472	2270636000	0.0205008	0.00202538	0.00937938	2018-11-08	15:16:00	7	-4240	0.00202284	8.79717	0.0937938
P64999@9			1.84556	2270147000	0.017457	0.00202505	0.00655898	2018-11-08	15:19:00	97	-4495	0.00202251	8.6343	0.0655898
P64999@10			1.84219	2281903000	0.0247861	0.00202519	0.00922834	2018-11-08	15:22:00	720	-4213	0.00202265	8.70203	0.0922834
P45587@01			1.83625	2279817000	0.0117551	0.00202673	0.0073963	2018-11-08	15:47:00	-907	-4065	0.00202419	9.47206	0.073963
P45587@2			1.82897	2245042000	0.0248012	0.00202776	0.00824198	2018-11-08	15:50:00	-698	-4704	0.00202522	9.9821	0.0824198
P45587@3			1.82662	2244095000	0.0304147	0.00202605	0.00704891	2018-11-08	15:53:00	-1040	-5155	0.00202351	9.13038	0.0704891
P45587@4			1.82725	2233776000	0.0107417	0.00202628	0.00847204	2018-11-08	15:57:00	-1412	-5136	0.00202374	9.24843	0.0847204
P45587@5			1.82451	2211481000	0.0173317	0.00202589	0.00786679	2018-11-08	16:00:00	-1209	-5676	0.00202335	9.05368	0.0786679
P45587@6			1.82459	2223889000	0.0172461	0.00202649	0.00593175	2018-11-08	16:03:00	-1233	-5756	0.00202395	9.35302	0.0593175
P45587@7			1.82913	2208735000	0.0300464	0.00202671	0.00763707	2018-11-08	16:06:00	-1163	-5834	0.00202417	9.45862	0.0763707
P45587@8			1.826	2238407000	0.0234808	0.00202639	0.00731146	2018-11-08	16:09:00	-964	-5606	0.00202385	9.30222	0.0731146
P45587@9			1.82522	2223750000	0.0189458	0.00202642	0.00942994	2018-11-08	16:12:00	-801	-5594	0.00202388	9.31816	0.0942994
P45587@10			1.8224	2213223000	0.026908	0.00202688	0.00724377	2018-11-08	16:15:00	-895	-5929	0.00202434	9.54279	0.0724377
P38707@01			1.81184	2219846000	0.0228372	0.00202445	0.00935916	2018-11-08	16:19:00	-2101	-4765	0.00202191	8.33346	0.0935916
P38707@2			1.81411	2231826000	0.0191578	0.0020248	0.00665642	2018-11-08	16:22:00	-2302	-4570	0.00202226	8.50878	0.0665642
P38707@3			1.81505	2235602000	0.0195211	0.00202316	0.00803194	2018-11-08	16:25:00	-2536	-4391	0.00202063	7.69343	0.0803194
P38707@4			1.81606	2245348000	0.0144053	0.00202508	0.00948912	2018-11-08	16:29:00	-2600	-4233	0.00202254	8.64974	0.0948912
P38707@5			1.81176	2233421000	0.0268312	0.0020248	0.00688565	2018-11-08	16:33:00	-2936	-3157	0.00202227	8.51077	0.0688565
P38707@6			1.81395	2215945000	0.0387682	0.00202338	0.00679678	2018-11-08	16:36:00	-3648	-2827	0.00202085	7.8045	0.0679678
P38707@7			1.81544	2241860000	0.0306081	0.0020244	0.00926374	2018-11-08	16:39:00	-3754	-2329	0.00202186	8.30905	0.0926374
P38707@8			1.81293	2242688000	0.0153991	0.00202435	0.00892151	2018-11-08	16:42:00	-3114	-2526	0.00202182	8.28713	0.0892151
P38707@9			1.8102	2228768000	0.0136548	0.00202434	0.0105734	2018-11-08	16:46:00	-2076	-4399	0.00202181	8.28166	0.105734
P38707@10			1.81145	2237335000	0.0130608	0.0020233	0.00753328	2018-11-08	16:49:00	-2357	-4171	0.00202077	7.76415	0.0753328
OU50091@01			1.78297	2270208000	0.0180457	0.0020292	0.0078042	2018-11-08	17:51:00	3204	-261	0.00202666	10.7018	0.078042
OU50091@2			1.78289	2282665000	0.0189223	0.0020296	0.00911326	2018-11-08	17:57:00	3298	232	0.00202706	10.9001	0.0911326
OU50091@3			1.7818	2278660000	0.0155546	0.00202967	0.00792636	2018-11-08	17:54:00	3471	-204	0.00202713	10.9349	0.0792636
OU50091@4			1.7789	2305498000	0.0150176	0.00202659	0.00863214	2018-11-08	18:00:00	3829	106	0.00202405	9.40084	0.0863214
OU50091@5			1.77773	2315462000	0.0213355	0.00202839	0.00691611	2018-11-08	18:03:00	4382	136	0.00202585	10.2959	0.0691611
OU50091@6			1.77554	2293768000	0.010688	0.00202892	0.00925704	2018-11-08	18:07:00	4462	-30	0.00202637	10.5599	0.0925704
OU50091@7			1.77703	2290605000	0.0147312	0.00202508	0.00790141	2018-11-08	18:10:00	5079	-67	0.00202254	8.64675	0.0790141
OU50091@8			1.77421	2290340000	0.0284208	0.00202749	0.00812587	2018-11-08	18:13:00	5607	-375	0.00202495	9.84911	0.0812587
OU50091@9			1.77351	2282025000	0.0152764	0.00202395	0.0080313	2018-11-08	18:16:00	5746	-621	0.00202141	8.08392	0.080313
OU50091@10			1.77218	2302731000	0.0186771	0.00203145	0.00706546	2018-11-08	18:20:00	5284	-354	0.0020289	11.82	0.0706546
OU50091@11			1.77186	2149211000	0.122972	0.00202328	0.00932764	2018-11-08	18:23:00	4578	780	0.00202074	7.75021	0.0932764
OU50091@12			1.77311	2302039000	0.0248551	0.00202813	0.00954763	2018-11-08	18:26:00	4216	564	0.00202559	10.1679	0.0954763
2018-11-09
P89667@01			1.76748	2297326000	0.0222294	0.00202053	0.00519736	2018-11-09	08:38:00	1208	-731	0.00201759	6.17969	0.0519736
P89667@2			1.75277	2280956000	0.0419434	0.00202253	0.008895	2018-11-09	08:43:00	1521	-596	0.00201959	7.17814	0.08895
P89667@3			1.74894	2263040000	0.0214664	0.00201992	0.00923944	2018-11-09	08:46:00	1527	-397	0.00201698	5.87393	0.0923944
P89667@4			1.74292	2257180000	0.0532662	0.00202099	0.00708945	2018-11-09	08:49:00	1742	-140	0.00201805	6.41026	0.0708945
P89667@5			1.73564	2253461000	0.075038	0.00202097	0.00803207	2018-11-09	08:52:00	1521	-156	0.00201804	6.40129	0.0803207
P89667@6			1.72719	2231372000	0.0309455	0.0020208	0.00961533	2018-11-09	08:55:00	1308	22	0.00201786	6.31365	0.0961533
P89667@7			1.71843	2223204000	0.0303709	0.00202235	0.010534	2018-11-09	08:58:00	1832	66	0.00201941	7.0885	0.10534
P89667@8			1.71076	2211443000	0.0306398	0.00201961	0.00855647	2018-11-09	09:01:00	1421	399	0.00201667	5.72205	0.0855647
P89667@9			1.70787	2204233000	0.0242304	0.00201995	0.00757477	2018-11-09	09:04:00	1630	512	0.00201701	5.88937	0.0757477
P89667@10			1.70208	2196339000	0.0387121	0.00202092	0.00850071	2018-11-09	09:07:00	1315	1094	0.00201798	6.3739	0.0850071
P89667@11			1.70146	2190477000	0.0181504	0.00201988	0.00979938	2018-11-09	09:10:00	1861	1094	0.00201695	5.8575	0.0979938
P89667@12			1.6923	2169389000	0.027317	0.00202234	0.00770377	2018-11-09	09:13:00	1663	1818	0.00201939	7.07854	0.0770377
P84150@01			1.68315	2153349000	0.0217618	0.0020169	0.00870995	2018-11-09	09:17:00	409	2222	0.00201396	4.37104	0.0870994
P84150@2			1.67517	2141493000	0.0302122	0.0020167	0.0099855	2018-11-09	09:20:00	176	1867	0.00201377	4.27343	0.099855
P84150@3			1.67126	2136548000	0.0262345	0.00201725	0.0119205	2018-11-09	09:23:00	3	1613	0.00201432	4.54583	0.119205
P84150@4			1.66586	2137412000	0.0237376	0.00201747	0.00889347	2018-11-09	09:26:00	126	1431	0.00201454	4.65688	0.0889347
P84150@5			1.66093	2133008000	0.0255335	0.00201689	0.00984723	2018-11-09	09:29:00	485	1278	0.00201396	4.36705	0.0984723
P84150@6			1.65647	2126583000	0.0269975	0.00201758	0.00980747	2018-11-09	09:32:00	498	1035	0.00201464	4.70916	0.0980747
P84150@7			1.65053	2121081000	0.0264097	0.00201761	0.00933752	2018-11-09	09:35:00	242	1018	0.00201468	4.7256	0.0933752
P84150@8			1.64388	2111947000	0.0314654	0.00201733	0.00809929	2018-11-09	09:38:00	-34	753	0.0020144	4.58815	0.0809929
P84150@9			1.63926	2111930000	0.0227066	0.00201734	0.00887036	2018-11-09	09:41:00	405	420	0.0020144	4.58915	0.0887036
P84150@10			1.63621	2105622000	0.035522	0.0020173	0.00850774	2018-11-09	09:44:00	408	253	0.00201436	4.56873	0.0850774
P84150@11			1.83367	2376660000	0.0395692	0.00201726	0.00617541	2018-11-09	10:45:00	342	-62	0.00201403	4.49583	0.0617541	0.0912224
P84150@12			1.83163	2357865000	0.0345287	0.00201738	0.00809791	2018-11-09	10:48:00	-205	427	0.00201415	4.55146	0.0809791	0.086614
P75836@01			1.82772	2331819000	0.0303562	0.00201776	0.00824857	2018-11-09	10:52:00	-1525	1812	0.00201453	4.73253	0.0824857	0.0804695
P75836@2			1.8249	2347928000	0.0283399	0.00201804	0.00935357	2018-11-09	10:55:00	-726	1326	0.00201481	4.87082	0.0935357	0.0758611
P75836@3			1.82412	2345307000	0.0294733	0.00201797	0.00984629	2018-11-09	10:58:00	-1011	977	0.00201474	4.83086	0.0984629	0.0712528
P75836@4			1.82334	2339510000	0.0264456	0.00201799	0.00856532	2018-11-09	11:01:00	-1274	994	0.00201476	4.83422	0.0856532	0.0666444
P75836@5			1.81857	2336624000	0.0269812	0.00201787	0.00600341	2018-11-09	11:05:00	-1078	628	0.00201464	4.76833	0.0600341	0.0604999
P75836@6			1.81732	2335791000	0.0297585	0.00201807	0.00737746	2018-11-09	11:08:00	-724	773	0.00201484	4.86579	0.0737746	0.0558915
P75836@7			1.81552	2322815000	0.031491	0.00201788	0.00733572	2018-11-09	11:11:00	-2025	538	0.00201465	4.76459	0.0733572	0.0512831
P75836@8			1.81301	2338576000	0.0335296	0.0020182	0.00831542	2018-11-09	11:14:00	-1710	-660	0.00201498	4.9218	0.0831542	0.0466747
P75836@9			1.8152	2335291000	0.0331696	0.00201826	0.00837848	2018-11-09	11:17:00	-1474	-603	0.00201503	4.94557	0.0837848	0.0420663
P75836@10			1.81246	2331294000	0.0313807	0.00201717	0.00882689	2018-11-09	11:20:00	-1634	-952	0.00201394	4.39576	0.0882689	0.0374579
P75836@11			1.80879	2332799000	0.0222314	0.00201825	0.00822891	2018-11-09	11:23:00	-1227	-1042	0.00201502	4.93187	0.0822891	0.0328495
P89321@01			1.79917	2316153000	0.0193967	0.00202031	0.0105326	2018-11-09	11:27:00	-4115	-3479	0.00201707	5.94793	0.105326	0.026705
P89321@2			1.79862	2308995000	0.021445	0.00202017	0.00749607	2018-11-09	11:30:00	-3974	-3000	0.00201694	5.8761	0.0749607	0.0220966
P89321@3			1.79948	2311859000	0.026697	0.00202046	0.00834642	2018-11-09	11:33:00	-3827	-2676	0.00201723	6.01489	0.0834642	0.0174882
P89321@4			1.79564	2316405000	0.0326838	0.00202051	0.00981432	2018-11-09	11:36:00	-3169	-3364	0.00201727	6.03368	0.0981432	0.0128799
P89321@5			1.79197	2293607000	0.0317013	0.0020202	0.00704556	2018-11-09	11:39:00	-3825	-1463	0.00201697	5.87771	0.0704556	0.00827146
P89321@6			1.79713	2294681000	0.0305376	0.00202044	0.00644237	2018-11-09	11:42:00	-3626	-1354	0.00201721	5.99061	0.0644237	0.00366308
P89321@7			1.79283	2300446000	0.0208172	0.00202039	0.00601204	2018-11-09	11:45:00	-2792	-1052	0.00201716	5.9626	0.0601204	-0.00094531
P89321@8			1.78727	2290858000	0.030512	0.0020206	0.00877178	2018-11-09	11:48:00	-2406	490	0.00201737	6.06405	0.0877178	-0.0055537
P89321@9			1.78915	2283211000	0.0336017	0.00202028	0.00854852	2018-11-09	11:51:00	-2609	490	0.00201705	5.89762	0.0854852	-0.0101621
P84143@01			1.76693	2294013000	0.0163188	0.00201836	0.00795262	2018-11-09	12:17:00	-1707	-3508	0.00201513	4.90369	0.0795262	-0.0501014
P84143@2			1.76662	2290914000	0.0349448	0.00201888	0.00595743	2018-11-09	12:20:00	-1461	-3860	0.00201565	5.15501	0.0595743	-0.0547098
P84143@3			1.76983	2293333000	0.0290625	0.00201896	0.00976563	2018-11-09	12:23:00	-1280	-3994	0.00201573	5.19372	0.0976563	-0.0593182
P84143@4			1.76678	2278802000	0.0282055	0.00201943	0.0100394	2018-11-09	12:26:00	-1313	-4152	0.0020162	5.42263	0.100394	-0.0639266
P84143@5			1.76388	2288211000	0.0413621	0.00201884	0.00738747	2018-11-09	12:29:00	-1445	-4344	0.00201561	5.12127	0.0738747	-0.068535
P84143@6			1.76326	2291886000	0.0233321	0.00201901	0.00910068	2018-11-09	12:32:00	-1374	-4517	0.00201578	5.20479	0.0910068	-0.0731434
P84143@7			1.76083	2291471000	0.0377434	0.00201851	0.00643838	2018-11-09	12:35:00	-1179	-4585	0.00201528	4.94774	0.0643838	-0.0777518
P84143@8			1.7588	2283006000	0.00949326	0.00201929	0.00604874	2018-11-09	12:38:00	-1739	-4561	0.00201606	5.33548	0.0604874	-0.0823602
P84143@9			1.75731	2282165000	0.0308184	0.00201879	0.00815183	2018-11-09	12:42:00	-1765	-4715	0.00201556	5.0774	0.0815183	-0.0885047
P84143@10			1.75817	2285820000	0.023576	0.00201885	0.00747905	2018-11-09	12:45:00	-1912	-5088	0.00201562	5.10515	0.0747905	-0.0931131
P84143@11			1.75911	2280577000	0.0280399	0.00201969	0.00758063	2018-11-09	12:48:00	-1777	-5387	0.00201646	5.51729	0.0758063	-0.0977214
P84143@12			1.75716	2289581000	0.0184617	0.0020189	0.00809211	2018-11-09	12:51:00	-1983	-5768	0.00201567	5.11834	0.0809211	-0.10233
P74756@01			1.75285	2297313000	0.0265348	0.00202821	0.00682189	2018-11-09	12:55:00	-571	-6336	0.00202496	9.7467	0.0682189	-0.108474
P74756@2			1.75387	2291524000	0.0236759	0.00202783	0.0102473	2018-11-09	12:58:00	-750	-6139	0.00202458	9.55189	0.102473	-0.113083
P74756@3			1.75426	2286428000	0.032193	0.00202205	0.00852985	2018-11-09	13:01:00	-753	-5856	0.00201881	6.67188	0.0852985	-0.117691
P74756@4			1.75418	2284623000	0.0295609	0.00202602	0.00842575	2018-11-09	13:04:00	-730	-5576	0.00202278	8.64545	0.0842575	-0.1223
P74756@5			1.75285	2285297000	0.017309	0.00202263	0.00626656	2018-11-09	13:07:00	-374	-5596	0.0020194	6.95344	0.0626657	-0.126908
P74756@6			1.74855	2280436000	0.0246082	0.00202681	0.00787773	2018-11-09	13:10:00	-622	-4663	0.00202356	9.02659	0.0787773	-0.131516
P74756@7			1.74792	2280069000	0.0293493	0.00201511	0.00795646	2018-11-09	13:13:00	-544	-4783	0.00201189	3.19848	0.0795646	-0.136125
P74756@8			1.74925	2277519000	0.0232203	0.00202243	0.0064505	2018-11-09	13:16:00	-466	-4517	0.00201919	6.83705	0.064505	-0.140733
P74756@9			1.74534	2272764000	0.0243317	0.0020223	0.0109772	2018-11-09	13:19:00	-630	-4358	0.00201906	6.76771	0.109772	-0.145341
P74756@10			1.74511	2270746000	0.0242882	0.00202819	0.00809353	2018-11-09	13:22:00	-650	-3595	0.00202494	9.69576	0.0809353	-0.14995
P80531@01			1.89062	2338846000	0.02382	0.00202303	0.00688817	2018-11-09	14:23:00	4582	-2570	0.00202093	7.84308	0.0688817
P80531@2			1.89117	2344394000	0.0289125	0.00202289	0.00923242	2018-11-09	14:26:00	4722	-2275	0.0020208	7.77732	0.0923242
P80531@3			1.89578	2337171000	0.0251127	0.00202284	0.00833166	2018-11-09	14:29:00	4660	-2038	0.00202074	7.74792	0.0833166
P80531@4			1.89171	2333568000	0.0222655	0.00202405	0.00844903	2018-11-09	14:32:00	4108	-2075	0.00202195	8.35222	0.0844903
P80531@5			1.88874	2325194000	0.0207338	0.0020231	0.00806627	2018-11-09	14:35:00	3942	-1876	0.002021	7.88044	0.0806627
P80531@6			1.88741	2325337000	0.0269447	0.00202316	0.00791785	2018-11-09	14:38:00	3722	-1854	0.00202106	7.91033	0.0791785
P80531@7			1.88874	2321334000	0.0229906	0.00202376	0.00568571	2018-11-09	14:41:00	3554	-2050	0.00202166	8.20825	0.056857
P80531@8			1.88624	2334020000	0.025922	0.002023	0.0112889	2018-11-09	14:44:00	3781	-2344	0.0020209	7.83212	0.112889
P80531@9			1.88788	2337830000	0.0383794	0.00202294	0.00770024	2018-11-09	14:47:00	4144	-2328	0.00202085	7.80272	0.0770024
P80531@10			1.88272	2319349000	0.0232919	0.00202242	0.00636418	2018-11-09	14:51:00	4246	-2005	0.00202032	7.54068	0.0636418
P71401@01			1.8145	2230660000	0.0242574	0.00202099	0.00820644	2018-11-09	17:19:00	3910	854	0.00201889	6.82678	0.0820644
P71401@2			1.81669	2238536000	0.0196574	0.00202076	0.0066127	2018-11-09	17:22:00	3624	577	0.00201866	6.71319	0.066127
P71401@3			1.81943	2235342000	0.0285261	0.00202084	0.00680738	2018-11-09	17:25:00	4599	131	0.00201875	6.75504	0.0680738
P71401@4			1.81778	2243238000	0.0170421	0.00202092	0.00872822	2018-11-09	17:28:00	4787	-281	0.00201882	6.7924	0.0872822
P71401@5			1.81786	2239668000	0.014672	0.00202102	0.00878365	2018-11-09	17:31:00	4552	-547	0.00201892	6.84372	0.0878365
P71401@6			1.81395	2240560000	0.0206824	0.00202104	0.00706135	2018-11-09	17:34:00	3888	-990	0.00201895	6.85617	0.0706135
P71401@7			1.81286	2239782000	0.00831516	0.00202133	0.00746629	2018-11-09	17:37:00	3389	-1071	0.00201923	6.99716	0.0746629
P71401@8			1.80894	2228240000	0.020856	0.00202085	0.0101642	2018-11-09	17:40:00	3306	-516	0.00201875	6.75753	0.101642
P71401@9			1.81043	2201727000	0.0147176	0.00202202	0.00780869	2018-11-09	17:43:00	3142	-34	0.00201993	7.3439	0.0780869
P71401@10			1.80808	2224380000	0.014982	0.00202067	0.0105613	2018-11-09	17:46:00	3406	-200	0.00201857	6.66985	0.105613
P51290@01			1.80636	2243439000	0.0176281	0.00202454	0.00846518	2018-11-09	17:43:00	3142	-34	0.00202244	8.59833	0.0846518
P51290@2			1.803	2239314000	0.0161698	0.00202461	0.00784318	2018-11-09	17:46:00	3406	-200	0.00202251	8.6332	0.0784318
P51290@3			1.803	2239776000	0.0126928	0.00202534	0.00729576	2018-11-09	17:50:00	1681	-3338	0.00202324	8.99638	0.0729576
P51290@4			1.80417	2237659000	0.0218615	0.00202473	0.0094059	2018-11-09	17:53:00	1890	-3649	0.00202263	8.69298	0.094059
P51290@5			1.80175	2237344000	0.0168275	0.00202484	0.0088918	2018-11-09	17:56:00	1454	-3835	0.00202274	8.74828	0.088918
P51290@6			1.80214	2241314000	0.021762	0.00202462	0.00766305	2018-11-09	18:00:00	1760	-3860	0.00202251	8.6347	0.0766305
P51290@7			1.80519	2248669000	0.0162731	0.00202533	0.00783405	2018-11-09	18:03:00	1443	-4462	0.00202323	8.9904	0.0783405
P51290@8			1.80511	2258258000	0.0176556	0.00202507	0.00872856	2018-11-09	18:06:00	1663	-4656	0.00202296	8.85938	0.0872856
P51290@9			1.80832	2254514000	0.0101571	0.00202594	0.00575057	2018-11-09	18:09:00	1534	-5121	0.00202384	9.29629	0.0575057
P51290@10			1.80574	2250852000	0.00928088	0.00202489	0.00769296	2018-11-09	18:12:00	1946	-6086	0.00202278	8.76921	0.0769296
P51290@11			1.80292	2240940000	0.0106594	0.00202506	0.00886077	2018-11-09	18:15:00	1740	-6001	0.00202296	8.85639	0.0886077
P51290@12			1.79604	2127860000	0.0285078	0.00202532	0.00539405	2018-11-09	18:18:00	1564	-6049	0.00202321	8.98392	0.0539405
2018-11-12
P75701@01			1.78774	2320276000	0.0289808	0.00202712	0.00722602	2018-11-12	08:34:00	1889	-690	0.00202359	9.17308	0.0722602
P75701@2			1.77969	2302241000	0.0250028	0.00202704	0.00843538	2018-11-12	08:37:00	1726	-686	0.00202352	9.13724	0.0843538
P75701@3			1.77327	2295860000	0.0166845	0.00202739	0.00965306	2018-11-12	08:40:00	2426	-220	0.00202387	9.30949	0.0965306
P75701@4			1.7678	2288605000	0.0326879	0.0020269	0.0099743	2018-11-12	08:43:00	2594	317	0.00202338	9.06456	0.099743
P75701@5			1.76654	2278081000	0.0219779	0.0020279	0.00718271	2018-11-12	08:46:00	2712	448	0.00202438	9.56538	0.0718271
P75701@6			1.75676	2266843000	0.0273243	0.00202716	0.00612086	2018-11-12	08:49:00	2380	542	0.00202364	9.19499	0.0612086
P75701@7			1.75074	2257575000	0.023695	0.00202745	0.00777747	2018-11-12	08:52:00	2100	453	0.00202392	9.33687	0.0777747
P75701@8			1.74464	2249308000	0.0215123	0.00202714	0.0053945	2018-11-12	08:55:00	1965	824	0.00202361	9.18354	0.053945
P75701@9			1.73556	2235738000	0.0263313	0.00202706	0.00740401	2018-11-12	08:58:00	1609	1540	0.00202354	9.1457	0.0740401
P75701@10			1.72954	2227412000	0.028807	0.00202607	0.00715466	2018-11-12	09:01:00	1566	1905	0.00202255	8.65334	0.0715466
P75701@11			1.72453	2211439000	0.0186322	0.00202725	0.00656846	2018-11-12	09:04:00	1634	2121	0.00202373	9.23979	0.0656846
P74751@01			1.70419	2217686000	0.0179901	0.00202329	0.0111869	2018-11-12	09:10:00	3008	-4748	0.00201977	7.26786	0.111869
P74751@2			1.70247	2209100000	0.0227976	0.00202336	0.00877651	2018-11-12	09:12:00	2774	-4892	0.00201984	7.30321	0.0877651
P74751@3			1.6995	2204434000	0.0277235	0.00202338	0.00760331	2018-11-12	09:15:00	3220	-4913	0.00201987	7.31566	0.0760331
P74751@4			1.69441	2194787000	0.026921	0.00202328	0.00793416	2018-11-12	09:18:00	2947	-5131	0.00201976	7.26189	0.0793416
P74751@5			1.68948	2191275000	0.0303532	0.00202343	0.0116653	2018-11-12	09:22:00	3787	-4982	0.00201992	7.33856	0.116653
P74751@6			1.68354	2183731000	0.0279996	0.00202371	0.00914486	2018-11-12	09:25:00	4587	-5146	0.0020202	7.47845	0.0914486
P74751@7			1.68002	2180336000	0.0237526	0.00202333	0.00854909	2018-11-12	09:28:00	4409	-4937	0.00201981	7.28827	0.0854909
P74751@8			1.67611	2178293000	0.0282997	0.00202309	0.00920632	2018-11-12	09:31:00	4405	-4625	0.00201958	7.16929	0.0920632
P74751@9			1.67267	2165996000	0.0141315	0.00202334	0.00546934	2018-11-12	09:34:00	4936	-4804	0.00201982	7.29176	0.0546934
P74751@10			1.66946	2160564000	0.0217591	0.00202356	0.0058416	2018-11-12	09:37:00	5144	-4773	0.00202004	7.40178	0.058416
P73236@01			1.85252	2401094000	0.021359	0.00201763	0.00857353	2018-11-12	10:36:00	1692	-4632	0.00201418	4.47874	0.0857353
P73236@2			1.85017	2393690000	0.0352081	0.00201788	0.00700345	2018-11-12	10:39:00	1671	-4812	0.00201442	4.59872	0.0700345
P73236@3			1.84783	2396202000	0.0328245	0.00201762	0.00827506	2018-11-12	10:42:00	1420	-5040	0.00201417	4.47277	0.0827506
P73236@4			1.84736	2425480000	0.136788	0.0020161	0.00899846	2018-11-12	10:45:00	1168	-4912	0.00201265	3.71653	0.0899846
P73236@5			1.8461	2390820000	0.055167	0.00201643	0.00949368	2018-11-12	10:48:00	1410	-5170	0.00201297	3.87734	0.0949368
P73236@6			1.83977	2373301000	0.0364196	0.00201728	0.0057251	2018-11-12	10:52:00	1075	-5859	0.00201383	4.3035	0.057251
P73236@7			1.8382	2370759000	0.0331656	0.00201773	0.00696109	2018-11-12	10:55:00	1106	-5660	0.00201427	4.52405	0.0696109
P73236@8			1.83484	2367968000	0.0425668	0.00201688	0.00674978	2018-11-12	10:58:00	1124	-5409	0.00201343	4.10237	0.0674978
P73236@9			1.82975	2367771000	0.040072	0.00201733	0.00590664	2018-11-12	11:01:00	1572	-6019	0.00201388	4.32739	0.0590664
P73236@10			1.82905	2365253000	0.0295023	0.0020175	0.00959857	2018-11-12	11:04:00	1429	-6878	0.00201405	4.41402	0.0959857
P73236@11			1.82459	2359419000	0.0425291	0.00201704	0.00773158	2018-11-12	11:07:00	1886	-7126	0.00201359	4.18352	0.0773158
P73236@12			1.82428	2359120000	0.0394633	0.00201744	0.00897053	2018-11-12	11:10:00	1720	-6345	0.00201398	4.38017	0.0897053
P73933@01			1.82342	2352676000	0.0345584	0.00202884	0.0081365	2018-11-12	11:14:00	258	-264	0.00202536	10.0552	0.081365
P73933@2			1.82389	2347456000	0.0311082	0.00202852	0.00699741	2018-11-12	11:17:00	404	-190	0.00202505	9.89983	0.0699741
P73933@3			1.82436	2345511000	0.0261802	0.00202853	0.00802154	2018-11-12	11:20:00	85	23	0.00202506	9.90182	0.0802154
P73933@4			1.82342	2342521000	0.0329795	0.00202873	0.00775924	2018-11-12	11:23:00	1	62	0.00202525	10.0014	0.0775924
P73933@5			1.81935	2333044000	0.0437345	0.00202852	0.00688296	2018-11-12	11:26:00	-249	-298	0.00202505	9.89734	0.0688296
P73933@6			1.81849	2332449000	0.0305605	0.00202882	0.00582395	2018-11-12	11:29:00	91	-298	0.00202535	10.0497	0.0582395
P73933@7			1.81325	2331195000	0.0357777	0.00202936	0.00564061	2018-11-12	11:32:00	91	-568	0.00202589	10.319	0.0564061
P73933@8			1.81254	2329662000	0.028398	0.00202841	0.00760639	2018-11-12	11:35:00	-190	-917	0.00202494	9.84208	0.0760639
P73933@9			1.80957	2327760000	0.030995	0.00202873	0.00865111	2018-11-12	11:38:00	141	-801	0.00202525	10.0014	0.0865111
P73933@10			1.80785	2319310000	0.0337566	0.00202879	0.0103418	2018-11-12	11:41:00	355	-977	0.00202532	10.0352	0.103418
P73425@01			1.78078	2273571000	0.0623465	0.00202599	0.0106342	2018-11-12	12:08:00	-1909	892	0.00202252	8.63778	0.106342
P73425@2			1.78407	2276898000	0.0414665	0.0020272	0.00726437	2018-11-12	12:11:00	-1973	938	0.00202373	9.24167	0.0726437
P73425@3			1.78266	2280922000	0.0360478	0.00202649	0.00901343	2018-11-12	12:14:00	-1830	787	0.00202302	8.88869	0.0901343
P73425@4			1.78602	2276870000	0.032808	0.00202703	0.00635673	2018-11-12	12:17:00	-1748	776	0.00202356	9.15853	0.0635673
P73425@5			1.78368	2274645000	0.0380561	0.00202698	0.0086343	2018-11-12	12:20:00	-1797	1092	0.00202351	9.13015	0.086343
P73425@6			1.78375	2282016000	0.0299421	0.00202646	0.00769596	2018-11-12	12:23:00	-1517	386	0.00202299	8.87077	0.0769596
P73425@7			1.78188	2279040000	0.0276709	0.00202719	0.00669512	2018-11-12	12:26:00	-1348	242	0.00202372	9.2342	0.0669512
P73425@8			1.7771	2273037000	0.0302478	0.0020258	0.00863652	2018-11-12	12:29:00	-1979	-33	0.00202234	8.54568	0.0863652
P73425@9			1.7753	2267567000	0.034301	0.00202702	0.00806011	2018-11-12	12:32:00	-2192	147	0.00202355	9.14957	0.0806011
P73425@10			1.77311	2268335000	0.0269719	0.00202624	0.0101478	2018-11-12	12:35:00	-2006	-195	0.00202277	8.76174	0.101478
OU56533@01			1.76412	2274948000	0.0206268	0.00201791	0.00744229	2018-11-12	12:39:00	-2172	-5320	0.00201446	4.61665	0.0744229
OU56533@2			1.76161	2268134000	0.0359942	0.00201753	0.00819867	2018-11-12	12:42:00	-2715	-5185	0.00201408	4.42746	0.0819867
OU56533@3			1.76091	2266022000	0.0276738	0.00201766	0.00824186	2018-11-12	12:46:00	-2511	-4993	0.00201421	4.49318	0.0824186
OU56533@4			1.76052	2265883000	0.0289836	0.00201756	0.00752114	2018-11-12	12:49:00	-1908	-5173	0.00201411	4.44339	0.0752114
OU56533@5			1.76052	2262345000	0.0666142	0.00201709	0.00830145	2018-11-12	12:52:00	-1605	-5130	0.00201364	4.2094	0.0830145
OU56533@6			1.75927	2266158000	0.0427535	0.00201743	0.00733386	2018-11-12	12:55:00	-1692	-5370	0.00201397	4.37569	0.0733386
OU56533@7			1.7595	2272050000	0.0309231	0.00201828	0.00683747	2018-11-12	12:58:00	-1507	-5988	0.00201483	4.80284	0.0683747
OU56533@8			1.75935	2262285000	0.0308499	0.00201774	0.00626056	2018-11-12	13:01:00	-1976	-5868	0.00201428	4.53002	0.0626056
OU56533@9			1.75723	2251313000	0.0381908	0.002018	0.00786604	2018-11-12	13:04:00	-2241	-6066	0.00201455	4.66145	0.0786604
OU56533@10			1.75575	2259897000	0.0223237	0.00201807	0.00651117	2018-11-12	13:07:00	-1632	-6230	0.00201462	4.69531	0.0651117
P73286@01			1.8835	2454069000	0.0416059	0.00202169	0.00713637	2018-11-12	13:59:00	4008	1554	0.00201818	6.47412	0.0713637
P73286@2			1.88514	2449806000	0.0335891	0.0020225	0.00709053	2018-11-12	14:02:00	3818	1282	0.00201899	6.87687	0.0709053
P73286@3			1.88272	2440078000	0.0432068	0.00202268	0.0072915	2018-11-12	14:05:00	3991	981	0.00201917	6.96698	0.072915
P73286@4			1.87755	2434584000	0.0412972	0.0020233	0.00649733	2018-11-12	14:08:00	4195	1008	0.00201979	7.27365	0.0649733
P73286@5			1.87755	2458851000	0.0469907	0.00202149	0.00708694	2018-11-12	14:11:00	3912	603	0.00201798	6.37256	0.0708694
P73286@6			1.87834	2442790000	0.0287996	0.00202267	0.00900025	2018-11-12	14:14:00	4181	381	0.00201916	6.9625	0.0900025
P73286@7			1.87481	2461556000	0.0486361	0.00202204	0.00729431	2018-11-12	14:17:00	4286	451	0.00201853	6.64936	0.0729431
P73286@8			1.87435	2448342000	0.0533705	0.00202166	0.00804	2018-11-12	14:20:00	3730	-17	0.00201815	6.45869	0.0804
P73286@9			1.87599	2454400000	0.0435909	0.00202228	0.00576135	2018-11-12	14:23:00	3889	-218	0.00201877	6.76635	0.0576135
P73286@10			1.87036	2443047000	0.0533944	0.00202165	0.00714403	2018-11-12	14:26:00	4346	-917	0.00201815	6.4562	0.0714402
P73286@11			1.86989	2448225000	0.0520959	0.00202175	0.00694852	2018-11-12	14:29:00	4614	-523	0.00201824	6.50101	0.0694852
P73286@12			1.86707	2429196000	0.0302104	0.00202289	0.00796283	2018-11-12	14:32:00	4983	-723	0.00201938	7.07203	0.0796283
P84948@01			1.85588	2378392000	0.0191539	0.00201746	0.00698603	2018-11-12	14:36:00	-3552	-2108	0.00201396	4.36777	0.0698604
P84948@2			1.8526	2374971000	0.034714	0.0020174	0.0084131	2018-11-12	14:39:00	-3751	-2610	0.0020139	4.3389	0.084131
P84948@3			1.85205	2374928000	0.0272919	0.00201847	0.00646733	2018-11-12	14:42:00	-3779	-2758	0.00201497	4.87059	0.0646733
P84948@4			1.85174	2375428000	0.03372	0.00201756	0.00750045	2018-11-12	14:45:00	-3646	-2949	0.00201406	4.41855	0.0750045
P84948@5			1.85048	2370705000	0.02049	0.00201749	0.00772462	2018-11-12	14:48:00	-3999	-3121	0.00201398	4.38071	0.0772463
P84948@6			1.85002	2365757000	0.0295774	0.0020175	0.00781376	2018-11-12	14:51:00	-4140	-3304	0.002014	4.38918	0.0781376
P84948@7			1.8472	2371500000	0.0349896	0.00201788	0.00587123	2018-11-12	14:54:00	-3314	-3346	0.00201438	4.57587	0.0587123
P84948@8			1.84407	2383480000	0.0283534	0.00201749	0.00787043	2018-11-12	14:58:00	-2267	-2732	0.00201399	4.3842	0.0787043
P84948@9			1.84258	2388768000	0.0280005	0.00201814	0.00890691	2018-11-12	15:01:00	-1723	-3011	0.00201464	4.7068	0.0890691
P84948@10			1.84415	2386200000	0.0271702	0.0020178	0.00605371	2018-11-12	15:04:00	-1951	-3295	0.0020143	4.53654	0.0605371
OU49201@01			1.8224	2374744000	0.030119	0.00202716	0.0065318	2018-11-12	15:28:00	-16	-4956	0.00202364	9.19481	0.065318
OU49201@2			1.82107	2374493000	0.0278389	0.00202839	0.00771842	2018-11-12	15:31:00	181	-4677	0.00202486	9.80665	0.0771842
OU49201@3			1.81958	2390844000	0.09834	0.00202659	0.00931111	2018-11-12	15:34:00	-204	-5055	0.00202307	8.91203	0.0931111
OU49201@4			1.81951	2366190000	0.035508	0.00202662	0.00823878	2018-11-12	15:37:00	-356	-5482	0.00202311	8.92946	0.0823878
OU49201@5			1.81481	2362007000	0.035822	0.00202631	0.00868868	2018-11-12	15:41:00	210	-6095	0.00202279	8.77264	0.0868868
OU49201@6			1.81442	2354696000	0.0359731	0.00202591	0.00946786	2018-11-12	15:44:00	7	-6190	0.0020224	8.57599	0.0946786
OU49201@7			1.81012	2353030000	0.0495179	0.00202552	0.00767334	2018-11-12	15:48:00	-636	-6824	0.00202201	8.38283	0.0767334
OU49201@8			1.81215	2358562000	0.0316329	0.0020264	0.0103813	2018-11-12	15:51:00	-554	-6991	0.00202288	8.81744	0.103813
OU49201@9			1.8134	2349484000	0.0662997	0.00202553	0.00987978	2018-11-12	15:53:00	-725	-7113	0.00202201	8.38433	0.0987978
OU49201@10			1.81246	2352047000	0.0506889	0.00202496	0.0067045	2018-11-12	15:56:00	-600	-7198	0.00202145	8.10355	0.067045
P52235@01			1.80284	2365930000	0.0295563	0.00202727	0.00511317	2018-11-12	16:07:00	3357	-2260	0.00202376	9.25355	0.0511317
P52235@2			1.80269	2361673000	0.0434665	0.00202604	0.00644364	2018-11-12	16:10:00	3438	-2501	0.00202253	8.64021	0.0644364
P52235@3			1.80175	2356688000	0.0269852	0.00202727	0.0067288	2018-11-12	16:13:00	3848	-2658	0.00202376	9.25405	0.067288
P52235@4			1.8019	2363007000	0.0381012	0.00202572	0.00934592	2018-11-12	16:17:00	3608	-2684	0.0020222	8.47892	0.0934592
P52235@5			1.80355	2360053000	0.0285058	0.00202804	0.010919	2018-11-12	16:20:00	3764	-2891	0.00202452	9.6329	0.10919
P52235@6			1.80026	2356185000	0.0200642	0.00202662	0.00826568	2018-11-12	16:23:00	4184	-3297	0.0020231	8.92896	0.0826568
P52235@7			1.79658	2348275000	0.0296344	0.00202696	0.00869237	2018-11-12	16:26:00	4370	-2976	0.00202345	9.09922	0.0869237
P52235@8			1.79134	2343861000	0.0293063	0.0020281	0.00682581	2018-11-12	16:29:00	4608	-3358	0.00202458	9.66526	0.0682581
P52235@9			1.79267	2349714000	0.018935	0.00202712	0.00662415	2018-11-12	16:32:00	4853	-3338	0.0020236	9.17489	0.0662415
P52235@10			1.78962	2348884000	0.0213461	0.00202709	0.00767733	2018-11-12	16:35:00	4461	-2667	0.00202357	9.15946	0.0767733
P52235@11			1.79025	2337628000	0.0284881	0.00202614	0.00770794	2018-11-12	16:38:00	4134	-2355	0.00202262	8.68701	0.0770794
P65142@01			1.87927	2471496000	0.0183282	0.00202302	0.00571799	2018-11-12	17:37:00	1261	-164	0.00201909	6.92887	0.0571799
P65142@2			1.87755	2467590000	0.0200681	0.00202198	0.00629901	2018-11-12	17:40:00	1767	-251	0.00201806	6.41372	0.0629901
P65142@3			1.87865	2472461000	0.0274387	0.00202175	0.00795543	2018-11-12	17:43:00	1880	-167	0.00201783	6.29774	0.0795543
P65142@4			1.87223	2462143000	0.021545	0.00202355	0.00853345	2018-11-12	17:46:00	2062	-123	0.00201962	7.19267	0.0853345
P65142@5			1.87036	2445282000	0.022979	0.00202362	0.00603981	2018-11-12	17:50:00	1753	2321	0.00201969	7.22801	0.0603981
P65142@6			1.86871	2440394000	0.0205286	0.0020222	0.00550928	2018-11-12	17:53:00	1244	2146	0.00201827	6.52023	0.0550928
P65142@7			1.87106	2441633000	0.0241937	0.00202343	0.00696942	2018-11-12	17:56:00	1325	2346	0.00201951	7.13444	0.0696942
P65142@8			1.86957	2438362000	0.0258744	0.00202307	0.00713144	2018-11-12	17:59:00	1608	2476	0.00201915	6.95724	0.0713144
P65142@9			1.86918	2440474000	0.0189371	0.00202341	0.00790035	2018-11-12	18:02:00	1418	2833	0.00201949	7.12448	0.0790035
OU49228@01			1.86472	2425728000	0.0296945	0.0020198	0.00813785	2018-11-12	18:05:00	-121	2474	0.00201588	5.32815	0.0813785
OU49228@2			1.8659	2426083000	0.0189549	0.00202023	0.00836441	2018-11-12	18:08:00	230	2293	0.00201631	5.53919	0.0836441
OU49228@3			1.86183	2432725000	0.0249976	0.0020201	0.00609129	2018-11-12	18:11:00	58	1683	0.00201618	5.47499	0.0609129
OU49228@4			1.85886	2435549000	0.0133816	0.00202031	0.00868967	2018-11-12	18:15:00	172	905	0.00201639	5.582	0.0868967
OU49228@5			1.858	2437993000	0.021744	0.0020202	0.00767032	2018-11-12	18:18:00	230	669	0.00201628	5.52476	0.0767032
OU49228@6			1.85581	2454202000	0.0567348	0.00201989	0.00750966	2018-11-12	18:21:00	-231	79	0.00201598	5.37494	0.0750966
OU49228@7			1.85487	2459271000	0.0320807	0.00201985	0.00800199	2018-11-12	18:24:00	391	-56	0.00201593	5.35055	0.0800199
OU49228@8			1.85416	2431064000	0.0249978	0.00201988	0.00900305	2018-11-12	18:27:00	360	-272	0.00201596	5.36747	0.0900305
P69005@01			1.84704	2452669000	0.0169339	0.00202245	0.00826796	2018-11-12	18:31:00	-1808	-4099	0.00201852	6.64467	0.0826796
P69005@2			1.84806	2456085000	0.0203681	0.00202245	0.00934494	2018-11-12	18:34:00	-1587	-4209	0.00201853	6.64765	0.0934494
P69005@3			1.8497	2451171000	0.0158402	0.00202269	0.00940502	2018-11-12	18:37:00	-1782	-4419	0.00201877	6.76562	0.0940502
P69005@4			1.84963	2452010000	0.0178017	0.00202289	0.00795208	2018-11-12	18:40:00	-1959	-4554	0.00201896	6.86417	0.0795208
P69005@5			1.83101	2430406000	0.0120957	0.00202272	0.00775615	2018-11-12	19:03:00	-2083	-4780	0.00201879	6.77905	0.0775615
P69005@6			1.82795	2427565000	0.0165817	0.00202291	0.00776246	2018-11-12	19:07:00	-1654	-4730	0.00201898	6.87412	0.0776246
P69005@7			1.82889	2450036000	0.037136	0.00202385	0.00856321	2018-11-12	19:10:00	-1471	-4607	0.00201993	7.34349	0.0856321
P69005@8			1.82991	2415762000	0.0225168	0.0020225	0.00757178	2018-11-12	19:13:00	-1369	-4304	0.00201858	6.67105	0.0757178
P70852@01			1.82389	2432798000	0.0173698	0.00202288	0.00869017	2018-11-12	19:17:00	4058	-3755	0.00201896	6.86168	0.0869017
P70852@2			1.82537	2429982000	0.0142828	0.00202355	0.00634216	2018-11-12	19:20:00	4721	-3708	0.00201963	7.19665	0.0634216
P70852@3			1.82467	2422928000	0.0263097	0.00202268	0.0090691	2018-11-12	19:23:00	4379	-4087	0.00201876	6.76313	0.090691
P70852@4			1.82475	2437978000	0.0192441	0.00202272	0.0078152	2018-11-12	19:26:00	3733	-4485	0.00201879	6.77856	0.078152
P70852@5			1.82357	2431977000	0.0152453	0.00202361	0.00871592	2018-11-12	19:29:00	3013	-4798	0.00201968	7.22353	0.0871592
P70852@6			1.82029	2416395000	0.0221738	0.00202309	0.00644682	2018-11-12	19:32:00	3335	-3742	0.00201916	6.96421	0.0644682
P70852@7			1.82076	2414901000	0.0215164	0.00202292	0.00704216	2018-11-12	19:35:00	3898	-3453	0.00201899	6.8781	0.0704216
P70852@8			1.81919	2415763000	0.0175686	0.00202445	0.00863734	2018-11-12	19:38:00	4362	-3924	0.00202052	7.64263	0.0863734
P89603@01			1.81333	2391506000	0.0204837	0.00202254	0.00672385	2018-11-12	19:42:00	4596	-983	0.00201861	6.68946	0.0672385
P89603@2			1.81239	2389415000	0.0202654	0.00202239	0.00788295	2018-11-12	19:45:00	5355	-976	0.00201847	6.61829	0.0788295
P89603@3			1.81333	2394784000	0.0177961	0.00202269	0.00581049	2018-11-12	19:48:00	5606	-235	0.00201877	6.76761	0.0581049
P89603@4			1.81395	2413838000	0.095705	0.00202214	0.00790017	2018-11-12	19:51:00	5362	-114	0.00201822	6.49385	0.0790017
P89603@5			1.81403	2391109000	0.0223229	0.00202284	0.007629	2018-11-12	19:54:00	5594	68	0.00201891	6.83928	0.07629
P89603@6			1.81223	2391613000	0.0264833	0.00202245	0.00642458	2018-11-12	19:57:00	4800	224	0.00201853	6.64715	0.0642458
P89603@7			1.81223	2381872000	0.0232376	0.00202264	0.00699733	2018-11-12	20:00:00	5118	674	0.00201872	6.74272	0.0699733
P89603@8			1.81059	2384377000	0.0174384	0.00202244	0.00803475	2018-11-12	20:03:00	5024	918	0.00201852	6.64218	0.0803475
2018-11-13
OU49208@01			1.81325	2384879000	0.0145497	0.0020233	0.00770946	2018-11-13	08:34:00	-619	-661	0.00201947	7.11674	0.0770946
OU49208@2			1.80981	2372889000	0.0239553	0.00202291	0.0087391	2018-11-13	08:37:00	-654	-518	0.00201909	6.9256	0.087391
OU49208@3			1.80785	2363554000	0.0172102	0.00202263	0.00873926	2018-11-13	08:40:00	-998	-526	0.0020188	6.78324	0.0873926
OU49208@4			1.80276	2359319000	0.0274211	0.00202295	0.00791118	2018-11-13	08:43:00	-955	-386	0.00201913	6.94601	0.0791118
OU49208@5			1.79784	2347641000	0.0168981	0.00202288	0.00639278	2018-11-13	08:46:00	-839	159	0.00201906	6.91167	0.0639278
OU49208@6			1.79134	2337316000	0.0270772	0.00202251	0.00801819	2018-11-13	08:49:00	-1176	324	0.00201868	6.72351	0.0801819
OU49208@7			1.78555	2330852000	0.01926	0.00202287	0.00818949	2018-11-13	08:52:00	-965	522	0.00201905	6.9052	0.0818949
OU49208@8			1.78219	2322978000	0.0222555	0.00202282	0.00782703	2018-11-13	08:55:00	-1179	1178	0.002019	6.8813	0.0782703
OU50101@01			1.77421	2316331000	0.0225556	0.00202304	0.00746756	2018-11-13	08:59:00	-2289	-258	0.00201922	6.98982	0.0746756
OU50101@2			1.76959	2311128000	0.0225127	0.0020229	0.0080257	2018-11-13	09:02:00	-1886	-137	0.00201907	6.91714	0.080257
OU50101@3			1.76787	2305517000	0.021853	0.00202258	0.00528124	2018-11-13	09:05:00	-1783	37	0.00201876	6.76184	0.0528124
OU50101@4			1.76177	2294147000	0.0295738	0.00202308	0.00729867	2018-11-13	09:08:00	-2329	274	0.00201926	7.01122	0.0729867
OU50101@5			1.76068	2290901000	0.0269099	0.00202297	0.00670014	2018-11-13	09:11:00	-2553	219	0.00201915	6.95547	0.0670014
OU50101@6			1.75856	2289655000	0.0224308	0.00202251	0.00713132	2018-11-13	09:14:00	-2572	526	0.00201869	6.726	0.0713132
OU50101@7			1.75418	2288278000	0.0327294	0.00202232	0.00780763	2018-11-13	09:17:00	-1806	1086	0.00201849	6.62993	0.0780763
OU50101@8			1.75058	2280820000	0.0228185	0.00202325	0.00877629	2018-11-13	09:20:00	-1710	312	0.00201942	7.09235	0.0877629
P70278@01			1.7419	2285833000	0.0224396	0.00202144	0.00826635	2018-11-13	09:24:00	-1773	-1634	0.00201761	6.19041	0.0826635
P70278@2			1.73642	2283471000	0.0237704	0.00202132	0.00775881	2018-11-13	09:27:00	-1549	-2461	0.0020175	6.13217	0.0775881
P70278@3			1.73502	2280846000	0.0319654	0.00202247	0.00740957	2018-11-13	09:30:00	-1245	-2325	0.00201865	6.70659	0.0740957
P70278@4			1.73228	2282058000	0.020262	0.00202171	0.00632102	2018-11-13	09:34:00	-1067	-2902	0.00201788	6.32531	0.0632102
P70278@5			1.8738	2458587000	0.0186732	0.00202138	0.00639565	2018-11-13	10:33:00	-1753	-2807	0.00201752	6.14423	0.0639565
P70278@6			1.8709	2457919000	0.0202254	0.00202098	0.0079492	2018-11-13	10:36:00	-2015	-2996	0.00201713	5.94961	0.079492
P70278@7			1.86762	2446635000	0.0215001	0.0020218	0.00772532	2018-11-13	10:39:00	-2333	-3278	0.00201794	6.35528	0.0772532
P70278@8			1.86167	2428841000	0.0246767	0.00202123	0.00505406	2018-11-13	10:42:00	-3201	-2174	0.00201737	6.06957	0.0505406
P71266@01			1.85573	2432146000	0.0193423	0.00202763	0.00800885	2018-11-13	10:46:00	2909	266	0.00202376	9.25767	0.0800885
P71266@2			1.85448	2429362000	0.0197667	0.00202738	0.00772567	2018-11-13	10:49:00	2673	408	0.00202352	9.13522	0.0772567
P71266@3			1.85307	2420583000	0.0255659	0.00202705	0.00919341	2018-11-13	10:52:00	3276	578	0.00202319	8.96947	0.0919341
P71266@4			1.85252	2421774000	0.0309262	0.00202741	0.00762539	2018-11-13	10:55:00	3671	372	0.00202355	9.14916	0.0762538
P71266@5			1.84908	2412471000	0.0263712	0.00202751	0.00952055	2018-11-13	10:58:00	3180	822	0.00202364	9.19645	0.0952055
P71266@6			1.8465	2416063000	0.103432	0.00202693	0.00568548	2018-11-13	11:01:00	3355	1375	0.00202307	8.91074	0.0568548
P71266@7			1.84579	2406795000	0.0249321	0.00202815	0.0075661	2018-11-13	11:04:00	3437	1699	0.00202428	9.51501	0.075661
P71266@8			1.84063	2405872000	0.0283651	0.00202715	0.00507072	2018-11-13	11:07:00	2666	927	0.00202328	9.01775	0.0507072
P71266@9			1.84172	2401951000	0.0247467	0.00202739	0.00745663	2018-11-13	11:10:00	2892	1060	0.00202352	9.13871	0.0745663
OU45201@01			1.83468	2427941000	0.0199074	0.00202253	0.00678436	2018-11-13	11:14:00	1593	-3410	0.00201867	6.71714	0.0678436
OU45201@2			1.83265	2425195000	0.0291164	0.0020223	0.00734004	2018-11-13	11:17:00	1735	-4128	0.00201845	6.60565	0.0734004
OU45201@3			1.83163	2440858000	0.0327168	0.00202268	0.00620666	2018-11-13	11:20:00	2107	-4037	0.00201882	6.79429	0.0620666
OU45201@4			1.83265	2428367000	0.0268539	0.00202261	0.00597772	2018-11-13	11:23:00	2173	-4239	0.00201875	6.75846	0.0597772
OU45201@5			1.83101	2423389000	0.0244692	0.00202264	0.00659017	2018-11-13	11:26:00	2236	-4554	0.00201878	6.77438	0.0659017
OU45201@6			1.82702	2416893000	0.0222398	0.00202255	0.00867048	2018-11-13	11:29:00	1671	-5062	0.00201869	6.72809	0.0867048
OU45201@7			1.82561	2425004000	0.0274819	0.0020222	0.00669297	2018-11-13	11:32:00	1765	-5476	0.00201834	6.55487	0.0669297
OU45201@8			1.82365	2423248000	0.0210299	0.00202274	0.0088074	2018-11-13	11:35:00	2017	-5839	0.00201888	6.82316	0.088074
P89642@01			1.87521	2278805000	0.0360054	0.00202611	0.00783888	2018-11-13	12:55:00	1878	223	0.00202346	9.17128	0.0783888	0.063172
P89642@2			1.87474	2272071000	0.0489788	0.00202575	0.00724034	2018-11-13	12:58:00	1615	352	0.0020231	8.98813	0.0724034	0.059324
P89642@3			1.87755	2276230000	0.0442811	0.00202598	0.00674533	2018-11-13	13:01:00	2244	427	0.00202334	9.10182	0.0674533	0.055476
P89642@4			1.87701	2253406000	0.0421881	0.00202733	0.00878623	2018-11-13	13:04:00	1319	932	0.00202469	9.77085	0.0878623	0.0516279
P89642@5			1.87529	2242284000	0.0330601	0.00202573	0.00525431	2018-11-13	13:07:00	1769	1900	0.00202309	8.96812	0.0525431	0.0477799
P89642@6			1.87317	2228653000	0.0476244	0.0020251	0.0106323	2018-11-13	13:10:00	1447	2133	0.00202246	8.6515	0.106323	0.0439318
P89642@7			1.87122	2218018000	0.0451753	0.0020268	0.0093979	2018-11-13	13:13:00	1358	2576	0.00202415	9.49135	0.093979	0.0400838
P89642@8			1.86723	2228148000	0.046464	0.00202687	0.00837255	2018-11-13	13:16:00	2468	2313	0.00202422	9.52236	0.0837255	0.0362357
P89642@9			1.86942	2231665000	0.0474946	0.00202572	0.00803506	2018-11-13	13:19:00	2627	1992	0.00202308	8.95024	0.0803506	0.0323877
P89642@10			1.86895	2237840000	0.0329359	0.00202591	0.00671034	2018-11-13	13:22:00	2048	1745	0.00202326	9.03654	0.0671034	0.0285397
P73926@01			1.8605	2290908000	0.0469559	0.00201664	0.0100211	2018-11-13	13:27:00	-4166	-2650	0.00201401	4.41666	0.100211	0.0221262
P73926@2			1.8612	2286506000	0.0404382	0.00201657	0.00806459	2018-11-13	13:30:00	-4022	-2736	0.00201394	4.37446	0.0806459	0.0182782
P73926@3			1.86347	2287611000	0.0370993	0.00201643	0.00769823	2018-11-13	13:33:00	-3811	-2461	0.0020138	4.30288	0.0769823	0.0144302
P73926@4			1.86472	2280772000	0.0386595	0.00201637	0.0125683	2018-11-13	13:36:00	-3617	-2489	0.00201374	4.26915	0.125683	0.0105821
P73926@5			1.85713	2282190000	0.0435455	0.00201659	0.0057653	2018-11-13	13:39:00	-3549	-2784	0.00201395	4.37288	0.057653	0.00673408
P73926@6			1.85933	2284764000	0.0395712	0.00201667	0.00931455	2018-11-13	13:42:00	-3315	-2641	0.00201404	4.41037	0.0931455	0.00288603
P73926@7			1.85909	2282667000	0.0324783	0.00201682	0.00620183	2018-11-13	13:45:00	-3235	-2711	0.00201419	4.48372	0.0620183	-0.000962011
P73926@8			1.85549	2291444000	0.0365943	0.00201665	0.00746496	2018-11-13	13:48:00	-3691	-3119	0.00201402	4.39172	0.0746496	-0.00481005
P73926@9			1.85909	2296137000	0.0389429	0.0020169	0.00638963	2018-11-13	13:51:00	-3808	-3275	0.00201427	4.51537	0.0638963	-0.0086581
P73926@10			1.85784	2290983000	0.0384891	0.00201653	0.00913761	2018-11-13	13:54:00	-3465	-3347	0.0020139	4.32724	0.0913761	-0.0125061
P73926@11			1.8544	2282029000	0.0282517	0.00201693	0.00620226	2018-11-13	13:57:00	-3983	-3526	0.00201429	4.51863	0.0620226	-0.0163542
P73926@12			1.84689	2304786000	0.0330871	0.00201686	0.00553069	2018-11-13	14:00:00	-2662	-4070	0.00201423	4.48191	0.0553069	-0.0202022
P89645@01			1.8339	2227643000	0.0387285	0.00202576	0.0100118	2018-11-13	14:25:00	219	-115	0.00202311	8.88052	0.100118	-0.0522693
P89645@2			1.83453	2226949000	0.0367694	0.00202762	0.00761867	2018-11-13	14:28:00	242	40	0.00202497	9.80355	0.0761867	-0.0561173
P89645@3			1.8339	2214370000	0.0451951	0.00202584	0.00778063	2018-11-13	14:31:00	219	625	0.0020232	8.91516	0.0778063	-0.0599653
P89645@4			1.8321	2207966000	0.0342336	0.00202324	0.00930076	2018-11-13	14:34:00	-491	874	0.0020206	7.61438	0.0930076	-0.0638134
P89645@5			1.83359	2199032000	0.0406676	0.002026	0.00668321	2018-11-13	14:37:00	-368	1102	0.00202336	8.98715	0.0668321	-0.0676614
P89645@6			1.83398	2212324000	0.0427367	0.00202596	0.00601041	2018-11-13	14:40:00	-573	395	0.00202331	8.96189	0.0601041	-0.0715095
P89645@7			1.83312	2201256000	0.0324642	0.00202235	0.00846926	2018-11-13	14:43:00	-164	1088	0.00201971	7.16007	0.0846926	-0.0753575
P89645@8			1.83273	2199077000	0.0450461	0.00202585	0.00799463	2018-11-13	14:46:00	128	1699	0.00202321	8.9004	0.0799463	-0.0792056
P89645@9			1.83273	2181712000	0.0359657	0.00202267	0.00752506	2018-11-13	14:49:00	482	2540	0.00202003	7.31374	0.0752506	-0.0830536
P89645@10			1.83586	2183044000	0.0400334	0.00202552	0.00737995	2018-11-13	14:52:00	240	2558	0.00202288	8.72935	0.0737995	-0.0869016
P89645@11			1.83625	2177786000	0.0337974	0.00202532	0.0104551	2018-11-13	14:55:00	-527	2652	0.00202268	8.62439	0.104551	-0.0907497
P89645@12			1.83445	2178884000	0.0401121	0.00202566	0.00752008	2018-11-13	14:58:00	-422	2075	0.00202302	8.79188	0.0752008	-0.0945977
P70659@01			1.82107	2249864000	0.0306975	0.00202584	0.00624052	2018-11-13	15:03:00	5435	-1581	0.0020232	8.87611	0.0624052	-0.101011
P70659@2			1.82005	2254127000	0.0326509	0.0020264	0.00727905	2018-11-13	15:06:00	4996	-1796	0.00202376	9.15017	0.0727905	-0.104859
P70659@3			1.82154	2247233000	0.0273472	0.00202586	0.00928447	2018-11-13	15:09:00	4609	-1596	0.00202321	8.87489	0.0928447	-0.108707
P70659@4			1.81966	2244931000	0.0317093	0.00202585	0.00766836	2018-11-13	15:12:00	4381	-1476	0.00202321	8.86705	0.0766836	-0.112555
P70659@5			1.81739	2259350000	0.036209	0.00202607	0.00821061	2018-11-13	15:15:00	4987	-2409	0.00202342	8.97128	0.0821061	-0.116403
P70659@6			1.81778	2251855000	0.0388404	0.00202639	0.00785302	2018-11-13	15:18:00	5308	-2146	0.00202374	9.12731	0.0785302	-0.120251
P70659@7			1.81818	2263524000	0.0302737	0.0020266	0.00800648	2018-11-13	15:21:00	4804	-2667	0.00202395	9.22805	0.0800648	-0.124099
P70659@8			1.81833	2260965000	0.0250783	0.00202679	0.00993421	2018-11-13	15:24:00	4733	-2492	0.00202414	9.31784	0.0993421	-0.127947
P70659@9			1.81192	2235672000	0.0363849	0.00202594	0.00869492	2018-11-13	15:27:00	3299	-1633	0.00202329	8.89164	0.0869492	-0.131795
P70659@10			1.81145	2236309000	0.0353488	0.00202656	0.00928321	2018-11-13	15:30:00	2780	-1742	0.00202391	9.19659	0.0928321	-0.135644
P70787@01			1.89453	2210747000	0.0519234	0.00202288	0.0063202	2018-11-13	16:36:00	-1477	2106	0.00202028	7.56462	0.063202	0.0433557
P70787@2			1.89672	2174491000	0.0524507	0.00202283	0.0117364	2018-11-13	16:39:00	-1636	2275	0.00202024	7.54064	0.117364	0.0417924
P70787@3			1.89758	2203155000	0.0348462	0.00202454	0.00683479	2018-11-13	16:42:00	-1854	2115	0.00202195	8.39126	0.0683479	0.0402291
P70787@4			1.89625	2201136000	0.0297633	0.00202338	0.00778954	2018-11-13	16:45:00	-2080	2073	0.00202078	7.81045	0.0778954	0.0386657
P70787@5			1.89101	2212456000	0.037497	0.00202479	0.00855375	2018-11-13	16:48:00	-1654	1672	0.0020222	8.51265	0.0855375	0.0371024
P70787@6			1.88827	2219214000	0.0296475	0.00202293	0.00871296	2018-11-13	16:51:00	-1300	1317	0.00202034	7.58419	0.0871296	0.0355391
P70787@7			1.88412	2238516000	0.0265778	0.00202298	0.00790521	2018-11-13	16:55:00	-1752	11	0.00202039	7.60652	0.0790521	0.0334546
P70787@8			1.88373	2239983000	0.0300105	0.0020238	0.0060502	2018-11-13	16:58:00	-1884	-107	0.0020212	8.01087	0.060502	0.0318913
P70787@9			1.8824	2232318000	0.0301872	0.00202394	0.0076609	2018-11-13	17:01:00	-2140	-70	0.00202134	8.07754	0.076609	0.030328
P70787@10			1.88037	2247394000	0.0318875	0.0020221	0.00882797	2018-11-13	17:04:00	-1796	-606	0.00201951	7.16353	0.0882797	0.0287646
P70787@11			1.8792	2253506000	0.0280657	0.00202313	0.0114768	2018-11-13	17:07:00	-1763	-766	0.00202054	7.67547	0.114768	0.0272013
P70787@12			1.8774	2229282000	0.0348716	0.00202256	0.0077547	2018-11-13	17:10:00	-1568	303	0.00201996	7.38802	0.077547	0.025638
P89631@01			1.87372	2253840000	0.0293232	0.00202742	0.00878698	2018-11-13	17:14:00	-4017	-1939	0.00202482	9.80801	0.0878698	0.0235535
P89631@2			1.87255	2252945000	0.0475052	0.00202671	0.00644092	2018-11-13	17:17:00	-3605	-1281	0.00202411	9.45133	0.0644092	0.0219902
P89631@3			1.87372	2234824000	0.0297615	0.0020272	0.0053522	2018-11-13	17:20:00	-4206	-1120	0.0020246	9.69581	0.053522	0.0204268
P89631@4			1.87325	2221106000	0.0331572	0.00202673	0.0100489	2018-11-13	17:23:00	-4269	-742	0.00202413	9.45866	0.100489	0.0188635
P89631@5			1.87278	2219521000	0.0314059	0.00202703	0.00647805	2018-11-13	17:26:00	-4054	-608	0.00202443	9.60552	0.0647805	0.0173002
P89631@6			1.87106	2216950000	0.024199	0.0020273	0.00940246	2018-11-13	17:29:00	-3803	-372	0.0020247	9.73894	0.0940246	0.0157368
P89631@7			1.86934	2216319000	0.0287252	0.00202739	0.00653207	2018-11-13	17:32:00	-3570	-400	0.00202479	9.78419	0.0653207	0.0141735
P89631@8			1.86629	2189396000	0.0310377	0.00202708	0.00869458	2018-11-13	17:32:00	-3570	-400	0.00202448	9.6278	0.0869458	0.0141735
P73940@01			1.85252	2201540000	0.0308907	0.00202529	0.00735198	2018-11-13	17:56:00	-23	-2291	0.00202269	8.72226	0.0735198	0.00166683
P73940@2			1.85408	2205747000	0.0264484	0.0020255	0.0115637	2018-11-13	18:00:00	3508	866	0.0020229	8.82477	0.115637	-0.000417612
P73940@3			1.85307	2189259000	0.0241798	0.00202462	0.00907673	2018-11-13	18:03:00	3401	965	0.00202202	8.3874	0.0907673	-0.00198095
P73940@4			1.85025	2193166000	0.0352091	0.00202511	0.00704073	2018-11-13	18:06:00	3285	1614	0.00202251	8.6279	0.0704073	-0.00354428
P73940@5			1.84908	2230840000	0.0293954	0.00202533	0.00820633	2018-11-13	18:09:00	4019	1246	0.00202273	8.7389	0.0820633	-0.00510761
P73940@6			1.85307	2230028000	0.0304675	0.00202615	0.00820989	2018-11-13	18:12:00	4036	-512	0.00202355	9.14226	0.0820989	-0.00667095
P73940@7			1.85158	2217409000	0.0312882	0.00202557	0.00983167	2018-11-13	18:15:00	3765	-443	0.00202297	8.85381	0.0983167	-0.00823428
P73940@8			1.85009	2214939000	0.0283319	0.00202579	0.00840608	2018-11-13	18:18:00	3604	-137	0.00202319	8.96232	0.0840608	-0.00979762
P73940@9			1.84657	2205534000	0.0266212	0.00202499	0.00731851	2018-11-13	18:21:00	3280	-79	0.00202239	8.56281	0.0731851	-0.011361
P73940@10			1.84493	2198046000	0.034388	0.00202478	0.00739887	2018-11-13	18:24:00	3995	229	0.00202218	8.45366	0.0739887	-0.0129243
P57323@01			1.83828	2268292000	0.023457	0.00202825	0.00522072	2018-11-13	18:27:00	3643	502	0.00202564	10.1799	0.0522072	-0.0144876
P57323@2			1.83593	2270584000	0.0238761	0.00202811	0.00928295	2018-11-13	18:31:00	4227	-3834	0.0020255	10.1081	0.0928295	-0.0165721
P57323@3			1.8375	2274459000	0.0265206	0.00202804	0.00521391	2018-11-13	18:35:00	4016	-3792	0.00202543	10.0711	0.0521391	-0.0186565
P57323@4			1.83789	2284527000	0.0374036	0.00202836	0.00867988	2018-11-13	18:38:00	3658	-3978	0.00202576	10.2329	0.0867988	-0.0202198
P57323@5			1.83742	2278936000	0.0540841	0.00202764	0.00780435	2018-11-13	18:41:00	3827	-4502	0.00202504	9.87076	0.0780435	-0.0217832
P57323@6			1.83961	2278880000	0.0251988	0.0020281	0.00802901	2018-11-13	18:44:00	3459	-4741	0.0020255	10.1003	0.0802901	-0.0233465
P57323@7			1.83726	2270091000	0.0366738	0.00202503	0.00758037	2018-11-13	18:47:00	3210	-4432	0.00202243	8.56818	0.0758037	-0.0249098
P57323@8			1.83257	2264832000	0.0344996	0.0020285	0.00878957	2018-11-13	18:50:00	2806	-4050	0.0020259	10.2959	0.0878957	-0.0264732
P57323@9			1.83492	2259429000	0.0276456	0.00202556	0.00757361	2018-11-13	18:53:00	3350	-3820	0.00202296	8.82803	0.0757362	-0.0280365
P57323@10			1.83265	2257425000	0.0185545	0.0020276	0.00803429	2018-11-13	18:56:00	3216	-3834	0.00202499	9.84202	0.0803429	-0.0295999
P89649@01			1.81935	2264880000	0.0254424	0.00202164	0.00891908	2018-11-13	19:19:00	614	-2406	0.00201905	6.86357	0.0891908	-0.0415854
P89649@2			1.81669	2252864000	0.0306629	0.00202146	0.00674098	2018-11-13	19:23:00	1947	-4889	0.00201887	6.77134	0.0674098	-0.0436699
P89649@3			1.81732	2263642000	0.0174955	0.00202056	0.00909146	2018-11-13	19:26:00	2143	-4769	0.00201796	6.31953	0.0909146	-0.0452332
P89649@4			1.81466	2243165000	0.0299939	0.00202097	0.010711	2018-11-13	19:29:00	2080	-5232	0.00201837	6.52317	0.10711	-0.0467965
P89649@5			1.81403	2276970000	0.0167022	0.00202169	0.00719193	2018-11-13	19:33:00	1408	-4069	0.00201909	6.87869	0.0719193	-0.048881
P89649@6			1.81473	2263715000	0.0216741	0.00202123	0.00892575	2018-11-13	19:36:00	1169	-6000	0.00201863	6.64752	0.0892575	-0.0504443
P76687@01			1.81106	2264272000	0.023028	0.00201882	0.00756799	2018-11-13	19:39:00	524	-5684	0.00201623	5.44762	0.0756799	-0.0520076
P76687@2			1.80996	2259622000	0.0304324	0.00201886	0.00913945	2018-11-13	19:42:00	-1414	-6011	0.00201627	5.46647	0.0913945	-0.053571
P76687@3			1.81137	2246495000	0.0252984	0.00201876	0.00787131	2018-11-13	19:45:00	-1254	-5674	0.00201616	5.41212	0.0787131	-0.0551343
P76687@4			1.81301	2252506000	0.0230309	0.00201887	0.00713082	2018-11-13	19:48:00	-1918	-5340	0.00201628	5.46833	0.0713082	-0.0566976
P76687@5			1.81176	2245396000	0.0257401	0.00201846	0.00984019	2018-11-13	19:51:00	-1794	-5557	0.00201586	5.26007	0.0984019	-0.058261
P76687@6			1.80981	2234084000	0.0251369	0.00201911	0.00832089	2018-11-13	19:54:00	-1414	-5014	0.00201652	5.58324	0.0832089	-0.0598243
2018-11-14
17NZ42@01			1.80761	2240557000	0.0191519	0.00201477	0.00695949	2018-11-14	08:34:00	836	1582	0.00201245	3.6167	0.0695949
17NZ42@2			1.80175	2232339000	0.0154464	0.00201452	0.00750727	2018-11-14	08:37:00	1049	2051	0.0020122	3.48868	0.0750727
17NZ42@3			1.7976	2220051000	0.017819	0.00201531	0.00742045	2018-11-14	08:40:00	640	1963	0.00201299	3.88469	0.0742045
17NZ42@4			1.79353	2204544000	0.0357183	0.00201516	0.00933868	2018-11-14	08:43:00	1099	3136	0.00201284	3.81097	0.0933868
17NZ42@5			1.78923	2201870000	0.0138406	0.002015	0.00783452	2018-11-14	08:46:00	1732	2887	0.00201268	3.73177	0.0783452
17NZ42@6			1.78407	2202738000	0.0158766	0.00201476	0.00991703	2018-11-14	08:49:00	2044	2530	0.00201244	3.61172	0.0991703
17NZ42@7			1.77953	2194571000	0.0220367	0.00201517	0.00883175	2018-11-14	08:52:00	1772	2290	0.00201285	3.81595	0.0883175
17NZ42@8			1.7703	2190170000	0.0110175	0.00201522	0.00927538	2018-11-14	08:55:00	2125	2080	0.0020129	3.83986	0.0927538
17NZ42@9			1.76537	2182521000	0.0193673	0.00201476	0.00811165	2018-11-14	08:58:00	1983	1842	0.00201244	3.60972	0.0811165
17NZ42@10			1.75575	2181867000	0.0298494	0.00201537	0.00876208	2018-11-14	09:02:00	1494	720	0.00201305	3.91408	0.0876208
17NZ44@01			1.74745	2164619000	0.0163194	0.00201665	0.00930698	2018-11-14	09:05:00	-11	795	0.00201433	4.55069	0.0930698
17NZ44@2			1.73854	2153477000	0.0143218	0.00201561	0.008646	2018-11-14	09:08:00	14	598	0.00201329	4.03463	0.08646
17NZ44@3			1.7358	2148265000	0.0188061	0.00201434	0.0081402	2018-11-14	09:11:00	-20	302	0.00201202	3.39951	0.081402
17NZ44@4			1.73189	2142595000	0.0207695	0.00201446	0.00688685	2018-11-14	09:14:00	-383	458	0.00201214	3.46078	0.0688685
17NZ44@5			1.72594	2124464000	0.018433	0.00201517	0.00899961	2018-11-14	09:17:00	-592	1234	0.00201285	3.81645	0.0899961
17NZ44@6			1.72273	2113871000	0.0146077	0.00201572	0.0065261	2018-11-14	09:20:00	-740	1510	0.0020134	4.08793	0.0652611
17NZ44@7			1.71687	2108696000	0.0136866	0.00201518	0.00920891	2018-11-14	09:23:00	-671	1828	0.00201285	3.81744	0.0920891
17NZ44@8			1.71241	2096065000	0.0196693	0.00201567	0.00841433	2018-11-14	09:26:00	-694	2007	0.00201335	4.06203	0.0841433
17NZ44@9			1.70646	2093177000	0.0249706	0.00201485	0.0075456	2018-11-14	09:29:00	-433	1702	0.00201254	3.65804	0.075456
17NZ44@10			1.69887	2079690000	0.0190262	0.00201525	0.00764621	2018-11-14	09:33:00	-189	2505	0.00201293	3.8558	0.0764621
17NZ46@01			1.89829	2292104000	0.0327835	0.00201575	0.00650724	2018-11-14	11:18:00	-974	-93	0.00201407	4.42402	0.0650724
17NZ46@2			1.89696	2282051000	0.0403647	0.00201576	0.00590402	2018-11-14	11:21:00	-1401	-131	0.00201408	4.42851	0.0590402
17NZ46@3			1.89625	2283622000	0.0350615	0.00201587	0.00749253	2018-11-14	11:24:00	-1400	374	0.00201419	4.48581	0.0749254
17NZ46@4			1.89766	2273099000	0.030795	0.0020162	0.00999739	2018-11-14	11:27:00	-1638	424	0.00201452	4.64925	0.0999739
17NZ46@5			1.8943	2280266000	0.0708543	0.00201536	0.00575358	2018-11-14	11:31:00	-1878	750	0.00201368	4.2287	0.0575358
17NZ46@6			1.88851	2234749000	0.0807521	0.00201541	0.0072125	2018-11-14	11:34:00	-2071	1116	0.00201373	4.25261	0.072125
17NZ46@7			1.88913	2258440000	0.0369047	0.00201583	0.0110282	2018-11-14	11:37:00	-2193	1857	0.00201415	4.46339	0.110282
17NZ46@8			1.88882	2246734000	0.0536407	0.00201562	0.0107332	2018-11-14	11:40:00	-1476	2190	0.00201395	4.36124	0.107332
17NZ46@9			1.88905	2259158000	0.14643	0.00201518	0.0102834	2018-11-14	11:43:00	-1561	1963	0.00201351	4.14249	0.102834
17NZ46@10			1.88272	2271770000	0.0263861	0.00201578	0.00767604	2018-11-14	11:47:00	-1199	609	0.0020141	4.43698	0.0767604
17NZ84@01			1.88147	2272627000	0.0310429	0.00201724	0.00711129	2018-11-14	11:51:00	-2983	-874	0.00201556	5.16647	0.0711129
17NZ84@2			1.88053	2278617000	0.0482212	0.00201736	0.00957463	2018-11-14	11:54:00	-2694	-543	0.00201568	5.22627	0.0957463
17NZ84@3			1.87888	2258563000	0.0342227	0.00201593	0.00804654	2018-11-14	11:58:00	-2865	-151	0.00201426	4.51621	0.0804654
17NZ84@4			1.87834	2257310000	0.0292013	0.00201713	0.00692203	2018-11-14	12:02:00	-3401	-244	0.00201545	5.11067	0.0692203
17NZ84@5			1.87849	2263440000	0.0305872	0.00201658	0.00817959	2018-11-14	12:05:00	-3067	-580	0.0020149	4.8396	0.0817959
17NZ84@6			1.87826	2260364000	0.0350968	0.00201701	0.00890469	2018-11-14	12:08:00	-2520	-559	0.00201533	5.05187	0.0890469
17NZ84@7			1.87912	2263579000	0.0265131	0.00201671	0.00681535	2018-11-14	12:11:00	-2248	-675	0.00201503	4.90288	0.0681535
17NZ84@8			1.87309	2260863000	0.0293681	0.00201736	0.00790373	2018-11-14	12:14:00	-2402	-1173	0.00201568	5.22726	0.0790373
17NZ84@9			1.87169	2282187000	0.0803131	0.00201582	0.0082885	2018-11-14	12:17:00	-2732	-1341	0.00201414	4.4594	0.082885
17NZ84@10			1.86777	2275525000	0.0281344	0.00201735	0.00774907	2018-11-14	12:20:00	-2667	-1830	0.00201567	5.22129	0.0774907
17NZ94@01			1.87701	2326616000	0.0532687	0.00201628	0.00972762	2018-11-14	13:22:00	-301	-4966	0.00201425	4.56152	0.0972762	0.0475052
17NZ94@2			1.87411	2327855000	0.00746042	0.00201641	0.00756087	2018-11-14	13:25:00	-443	-5323	0.00201438	4.6218	0.0756087	0.0445206
17NZ94@3			1.87216	2359860000	0.0164216	0.00201487	0.007293	2018-11-14	13:28:00	-430	-5622	0.00201284	3.85109	0.07293	0.041536
17NZ94@4			1.86965	2311593000	0.0190467	0.00201652	0.00762004	2018-11-14	13:31:00	-874	-5636	0.00201449	4.66914	0.0762004	0.0385514
17NZ94@5			1.86793	2303059000	0.850723	0.0020157	0.00600108	2018-11-14	13:34:00	-1046	-5550	0.00201367	4.26162	0.0600108	0.0355667
17NZ94@6			1.863	2290930000	0.0170722	0.00201682	0.00837941	2018-11-14	13:37:00	-1287	-4964	0.00201479	4.81463	0.0837941	0.0325821
17NZ94@7			1.86089	2300084000	0.0166322	0.00201499	0.00694913	2018-11-14	13:40:00	-1556	-5412	0.00201297	3.90242	0.0694913	0.0295975
17NZ94@8			1.85893	2307320000	0.0427724	0.00201612	0.00941741	2018-11-14	13:43:00	-1787	-5500	0.00201409	4.45892	0.0941741	0.0266129
17NZ96@01			1.85534	2321813000	0.0612505	0.00201475	0.00835686	2018-11-14	13:47:00	1095	-4166	0.00201272	3.7729	0.0835686	0.0226334
17NZ96@2			1.85213	2298108000	0.0239672	0.00201413	0.00634253	2018-11-14	13:50:00	968	-4867	0.0020121	3.46004	0.0634253	0.0196488
17NZ96@3			1.85072	2302040000	0.0200524	0.00201541	0.00682644	2018-11-14	13:53:00	1419	-5432	0.00201338	4.09575	0.0682644	0.0166641
17NZ96@4			1.84986	2311264000	0.0131778	0.00201523	0.00546982	2018-11-14	13:56:00	1345	-5718	0.0020132	4.00259	0.0546982	0.0136795
17NZ96@5			1.8483	2296979000	0.0234637	0.00201372	0.0081061	2018-11-14	13:59:00	1119	-5733	0.00201169	3.24931	0.081061	0.0106949
17NZ96@6			1.84431	2298612000	0.0255258	0.00201713	0.00687413	2018-11-14	14:02:00	1168	-5339	0.0020151	4.9432	0.0687413	0.00771027
17NZ96@7			1.84055	2266946000	0.014962	0.00201559	0.00848719	2018-11-14	14:05:00	871	-5508	0.00201356	4.17348	0.0848719	0.00472565
17NZ96@8			1.83703	2289340000	0.0176084	0.00201613	0.00777517	2018-11-14	14:08:00	1016	-5539	0.0020141	4.44102	0.0777517	0.00174103
17NZ96@9			1.83953	2283494000	0.0319231	0.00201464	0.00810813	2018-11-14	14:11:00	1387	-5294	0.00201261	3.69622	0.0810813	-0.00124359
17NZ87@01			1.82936	2248378000	0.0189044	0.00201604	0.00768468	2018-11-14	14:15:00	-1811	-3378	0.00201401	4.38623	0.0768468	-0.00522309
17NZ87@2			1.82647	2232493000	0.0210252	0.00201574	0.00985827	2018-11-14	14:18:00	-3005	-3787	0.00201371	4.23428	0.0985827	-0.00820771
17NZ87@3			1.82764	2237300000	0.0200004	0.00201611	0.00917502	2018-11-14	14:21:00	-2895	-4005	0.00201408	4.41613	0.0917502	-0.0111923
17NZ87@4			1.80323	2215969000	0.0147456	0.00201603	0.00877706	2018-11-14	14:46:00	-2654	-3926	0.002014	4.3524	0.0877706	-0.0360642
17NZ87@5			1.8012	2212076000	0.0160809	0.00201586	0.00603743	2018-11-14	14:49:00	-2682	-3757	0.00201383	4.26522	0.0603744	-0.0390488
OU49226@01			1.7987	2259043000	0.0119291	0.00202699	0.00911714	2018-11-14	14:53:00	2645	-5130	0.00202495	9.80622	0.0911714	-0.0430283
OU49226@2			1.79455	2253061000	0.0227729	0.00202701	0.00916215	2018-11-14	14:56:00	2664	-5469	0.00202497	9.81469	0.0916215	-0.0460129
OU49226@3			1.79486	2243224000	0.017492	0.002027	0.00528212	2018-11-14	15:00:00	2521	-3952	0.00202496	9.80274	0.0528212	-0.0499924
OU49226@4			1.79518	2236694000	0.0211219	0.00202676	0.00974211	2018-11-14	15:03:00	2678	-3382	0.00202472	9.68168	0.0974211	-0.052977
OU49226@5			1.79564	2227296000	0.0112219	0.00202663	0.0085475	2018-11-14	15:06:00	2408	-3283	0.00202459	9.61144	0.085475	-0.0559617
P52355@01			1.7897	2213969000	0.0141307	0.00202537	0.00915925	2018-11-14	15:10:00	2983	-2123	0.00202333	8.98023	0.0915925	-0.0599412
P52355@2			1.78321	2214560000	0.02214	0.00202622	0.00876704	2018-11-14	15:13:00	3036	-2382	0.00202418	9.4047	0.0876704	-0.0629258
P52355@3			1.78375	2220770000	0.0102389	0.00202651	0.00753387	2018-11-14	15:16:00	3258	-2751	0.00202447	9.54221	0.0753387	-0.0659104
P52355@4			1.78156	2214858000	0.0207906	0.00202611	0.00685061	2018-11-14	15:19:00	3691	-3083	0.00202407	9.34194	0.0685061	-0.068895
P52355@5			1.77663	2228894000	0.0206676	0.00202669	0.00975339	2018-11-14	15:22:00	4120	-4605	0.00202465	9.62691	0.0975339	-0.0718796
P45412@01			1.77562	2217312000	0.0307219	0.00202778	0.0092426	2018-11-14	15:26:00	5356	-2569	0.00202574	10.1655	0.092426	-0.0758591
P45412@2			1.77601	2216747000	0.00915326	0.00202431	0.011519	2018-11-14	15:29:00	5153	-2356	0.00202227	8.43373	0.11519	-0.0788438
P45412@3			1.7703	2203476000	0.0195989	0.00202813	0.0086126	2018-11-14	15:33:00	4935	-2511	0.00202609	10.3334	0.086126	-0.0828233
P45412@4			1.77038	2201167000	0.0164834	0.00202813	0.0109834	2018-11-14	15:36:00	4863	-2336	0.00202609	10.3304	0.109834	-0.0858079
P45412@5			1.76936	2198199000	0.0239514	0.00202738	0.00530471	2018-11-14	15:39:00	5241	-1733	0.00202533	9.95226	0.0530471	-0.0887925
P71392@01			1.7631	2175031000	0.0152311	0.0020223	0.00767186	2018-11-14	15:42:00	4739	279	0.00202027	7.4219	0.0767186	-0.0917771
P71392@2			1.76388	2177219000	0.00981228	0.00202242	0.0103138	2018-11-14	15:45:00	4736	605	0.00202039	7.4792	0.103138	-0.0947617
P71392@3			1.76294	2168970000	0.0412791	0.00202228	0.00801592	2018-11-14	15:48:00	4754	1054	0.00202024	7.40398	0.0801592	-0.0977464
P71392@4			1.76161	2160555000	0.018081	0.00202206	0.00941186	2018-11-14	15:51:00	4702	1231	0.00202002	7.29089	0.0941185	-0.100731
P71392@5			1.75849	2158252000	0.0157745	0.00202212	0.00634641	2018-11-14	15:54:00	4534	1575	0.00202008	7.31929	0.0634641	-0.103716
P57396@01			1.87795	2270497000	0.0548016	0.00201693	0.00897657	2018-11-14	16:55:00	464	2762	0.00201525	4.99996	0.0897657	-0.0115774
P57396@2			1.87708	2271161000	0.0875078	0.00201592	0.00791288	2018-11-14	16:58:00	955	2613	0.00201424	4.49534	0.0791289	-0.0109302
P57396@3			1.87176	2268878000	0.024601	0.00201768	0.00778963	2018-11-14	17:03:00	1025	2392	0.00201599	5.37241	0.0778963	-0.00985158
P57396@4			1.87294	2266926000	0.0282522	0.00201722	0.00937525	2018-11-14	17:06:00	829	2090	0.00201554	5.14584	0.0937525	-0.00920439
P57396@5			1.87153	2272555000	0.0280688	0.00201709	0.0111512	2018-11-14	17:10:00	1217	1965	0.00201541	5.08093	0.111512	-0.00834148
P57396@6			1.87161	2265977000	0.023488	0.00201706	0.00661102	2018-11-14	17:13:00	720	1588	0.00201538	5.06713	0.0661102	-0.0076943
P57396@7			1.86934	2265116000	0.0270046	0.00201686	0.00690999	2018-11-14	17:16:00	886	1492	0.00201518	4.96762	0.0690999	-0.00704711
P57396@8			1.86957	2270554000	0.0292265	0.00201747	0.00959479	2018-11-14	17:19:00	1030	691	0.00201579	5.27371	0.0959479	-0.00639993
P57396@9			1.86762	2261885000	0.0206881	0.00201707	0.00626159	2018-11-14	17:22:00	432	565	0.00201538	5.07256	0.0626159	-0.00575274
P62173@01			1.86081	2242244000	0.0241665	0.00201467	0.00758457	2018-11-14	17:25:00	-462	1774	0.00201299	3.87831	0.0758457	-0.00510556
P62173@2			1.85933	2233706000	0.0309224	0.00201441	0.00832709	2018-11-14	17:28:00	-758	2020	0.00201273	3.75189	0.0832709	-0.00445838
P62173@3			1.85839	2239919000	0.0216991	0.00201507	0.00715012	2018-11-14	17:31:00	-891	1144	0.00201339	4.08091	0.0715012	-0.00381119
P62173@4			1.85667	2233591000	0.0275186	0.00201429	0.00699571	2018-11-14	17:34:00	-861	955	0.00201261	3.6904	0.0699571	-0.00316401
P62173@5			1.85401	2238212000	0.0208958	0.00201476	0.00807716	2018-11-14	17:37:00	-468	901	0.00201308	3.92973	0.0807716	-0.00251683
P62173@6			1.84884	2231683000	0.0223059	0.00201484	0.00778554	2018-11-14	17:41:00	-764	609	0.00201316	3.96647	0.0778554	-0.00165391
P62173@7			1.85048	2241594000	0.0161024	0.00201479	0.00844012	2018-11-14	17:44:00	-895	166	0.00201311	3.94519	0.0844012	-0.00100673
P62173@8			1.84462	2234273000	0.0222181	0.00201533	0.00953495	2018-11-14	17:47:00	-468	76	0.00201365	4.21442	0.0953495	-0.000359547
P68171@01			1.83891	2270545000	0.0239461	0.00201785	0.00912927	2018-11-14	17:51:00	2054	-3543	0.00201617	5.46947	0.0912927	0.000503365
P68171@2			1.83883	2269753000	0.025339	0.00202373	0.00751978	2018-11-14	17:54:00	1776	-3438	0.00202204	8.40104	0.0751978	0.00115055
P68171@3			1.83766	2263509000	0.030307	0.00201808	0.00747279	2018-11-14	17:57:00	1807	-3815	0.0020164	5.58487	0.0747279	0.00179773
P68171@4			1.83382	2266434000	0.0232362	0.00201911	0.00916804	2018-11-14	18:00:00	2128	-3909	0.00201743	6.10075	0.0916804	0.00244492
P68171@5			1.83163	2267485000	0.0242966	0.00201869	0.00917971	2018-11-14	18:03:00	2268	-4199	0.00201701	5.89162	0.0917971	0.0030921
P68171@6			1.835	2265914000	0.0313283	0.00201821	0.00858102	2018-11-14	18:21:00	-901	-1703	0.00201653	5.65732	0.0858102	0.0069752
P68171@7			1.81583	2252992000	0.0158346	0.00201804	0.0082912	2018-11-14	18:30:00	2462	-4853	0.00201635	5.57106	0.082912	0.00891675
P68171@8			1.81458	2250486000	0.0225042	0.00201897	0.00584448	2018-11-14	18:33:00	2500	-5193	0.00201729	6.03811	0.0584448	0.00956394
P68171@9			1.81458	2254037000	0.017492	0.00202063	0.00914402	2018-11-14	18:36:00	1868	-5087	0.00201894	6.86342	0.0914402	0.0102111
P57310@01			1.81231	2231752000	0.0167391	0.00201383	0.00681701	2018-11-14	18:41:00	3505	520	0.00201215	3.47863	0.0681701	0.0112898
P57310@2			1.80902	2224403000	0.0172353	0.00201482	0.00581077	2018-11-14	18:44:00	3304	529	0.00201314	3.97308	0.0581077	0.0119369
P57310@3			1.80824	2215822000	0.0226967	0.00201409	0.00969427	2018-11-14	18:47:00	2516	625	0.00201241	3.60749	0.0969427	0.0125841
P57310@4			1.80848	2206449000	0.0165952	0.00201385	0.00552667	2018-11-14	18:50:00	2722	838	0.00201217	3.49004	0.0552667	0.0132313
P57310@5			1.80253	2209319000	0.0285794	0.00201432	0.0118533	2018-11-14	18:53:00	3615	764	0.00201264	3.72289	0.118533	0.0138785
P57310@6			1.8012	2209018000	0.0297314	0.00201407	0.0072444	2018-11-14	18:56:00	3827	1086	0.00201239	3.59847	0.072444	0.0145257
P57310@7			1.80292	2206252000	0.0333933	0.00201399	0.00859761	2018-11-14	18:59:00	3591	1357	0.00201231	3.56324	0.0859761	0.0151729
P57310@8			1.80175	2207306000	0.0194895	0.00201432	0.008484	2018-11-14	19:02:00	2930	2161	0.00201264	3.72483	0.08484	0.01582
P62174@01			1.79956	2218080000	0.0120056	0.00201474	0.00682862	2018-11-14	19:05:00	3334	-1856	0.00201305	3.93377	0.0682862	0.0164672
P62174@2			1.79588	2214536000	0.0249857	0.00201504	0.0080983	2018-11-14	19:08:00	3583	-1898	0.00201336	4.08539	0.080983	0.0171144
P62174@3			1.794	2224206000	0.0378583	0.00201462	0.00921203	2018-11-14	19:12:00	4036	-2209	0.00201295	3.88046	0.0921203	0.0179773
P62174@4			1.79095	2224939000	0.0168102	0.00201512	0.00917616	2018-11-14	19:15:00	3842	-3275	0.00201344	4.12876	0.0917616	0.0186245
P62174@5			1.79056	2222190000	0.0198417	0.00201495	0.0113458	2018-11-14	19:18:00	3584	-3452	0.00201327	4.0442	0.113458	0.0192717
P62174@6			1.7897	2213681000	0.0263533	0.0020147	0.00721665	2018-11-14	19:21:00	3504	-3084	0.00201302	3.92227	0.0721665	0.0199189
P62174@7			1.78884	2207231000	0.0178832	0.00201449	0.00960787	2018-11-14	19:24:00	3075	-3068	0.00201281	3.81429	0.0960787	0.0205661
P62174@8			1.78281	2206696000	0.026309	0.00201499	0.00803297	2018-11-14	19:27:00	3055	-3850	0.00201331	4.06458	0.0803297	0.0212132
P75280@01			1.77773	2161339000	0.018858	0.00201611	0.00536443	2018-11-14	19:30:00	-2038	-5561	0.00201443	4.62281	0.0536443	0.0218604
P75280@2			1.77452	2152748000	0.0170018	0.00201629	0.008201	2018-11-14	19:33:00	-2518	-5401	0.00201461	4.71464	0.08201	0.0225076
P75280@3			1.77335	2148718000	0.0241867	0.00201587	0.00730056	2018-11-14	19:36:00	-2330	-4758	0.00201419	4.50601	0.0730056	0.0231548
P75280@4			1.77327	2150525000	0.0222677	0.00201584	0.00705272	2018-11-14	19:39:00	-2092	-4446	0.00201416	4.4932	0.0705272	0.023802
2018-11-15
P75280@5			1.8127	2182738000	0.0208364	0.00201674	0.00605476	2018-11-15	08:46:00	-2031	-3359	0.00201509	4.93019	0.0605476
P75280@6			1.80934	2178270000	0.0247886	0.00201625	0.00942924	2018-11-15	08:49:00	-2055	-3611	0.00201459	4.68403	0.0942924
P75280@7			1.80519	2174057000	0.0215069	0.0020157	0.011364	2018-11-15	08:52:00	-2150	-3851	0.00201404	4.40698	0.11364
P75280@8			1.80222	2156670000	0.0258267	0.00201597	0.00992238	2018-11-15	08:56:00	-2637	-4297	0.00201431	4.54401	0.0992238
P58729@01			1.79494	2176546000	0.0158027	0.00202368	0.00912377	2018-11-15	08:59:00	-691	-3576	0.00202202	8.38585	0.0912377
P58729@2			1.79025	2159235000	0.0273289	0.00202308	0.00825013	2018-11-15	09:02:00	-1158	-3386	0.00202141	8.08588	0.0825013
P58729@3			1.78634	2162403000	0.0276244	0.00202334	0.00841502	2018-11-15	09:06:00	-519	-3353	0.00202168	8.21693	0.0841502
P58729@4			1.77734	2156045000	0.0139066	0.00202393	0.00894927	2018-11-15	09:09:00	-574	-4188	0.00202226	8.50843	0.0894927
P58729@5			1.77108	2138605000	0.0120378	0.0020242	0.00968644	2018-11-15	09:12:00	-417	-5572	0.00202253	8.64297	0.0968644
P58729@6			1.76764	2140550000	0.0239205	0.00202402	0.00771115	2018-11-15	09:16:00	-1079	-5292	0.00202236	8.55577	0.0771115
P58729@7			1.76404	2129309000	0.0287814	0.00202351	0.00808853	2018-11-15	09:19:00	-1320	-5718	0.00202184	8.29964	0.0808853
P58729@8			1.76091	2131621000	0.0222455	0.00202388	0.0101527	2018-11-15	09:22:00	-1054	-5934	0.00202221	8.48451	0.101527
P58729@9			1.75504	2115809000	0.104012	0.00202394	0.0092761	2018-11-15	09:25:00	-1382	-5099	0.00202228	8.5164	0.092761
P55547@01			1.75356	2142548000	0.0232673	0.00201533	0.00821755	2018-11-15	09:28:00	760	-4653	0.00201367	4.2256	0.0821755
P55547@2			1.74933	2133401000	0.0190115	0.00201582	0.00957382	2018-11-15	09:31:00	457	-4763	0.00201416	4.46927	0.0957382
P55547@3			1.74605	2143282000	0.033081	0.00201562	0.00696877	2018-11-15	09:34:00	263	-4660	0.00201396	4.36961	0.0696877
P55547@4			1.74339	2112029000	0.0284871	0.00201512	0.00988141	2018-11-15	09:37:00	207	-4944	0.00201346	4.11996	0.0988141
P55547@5			1.7394	2121327000	0.0298604	0.00201564	0.00876802	2018-11-15	09:40:00	851	-5022	0.00201398	4.37808	0.0876802
P55547@6			1.73728	2110838000	0.0389926	0.00201611	0.00987725	2018-11-15	09:43:00	267	-5344	0.00201445	4.61377	0.0987725
P55547@7			1.73494	2114320000	0.0211508	0.00201522	0.0091002	2018-11-15	09:46:00	723	-5901	0.00201356	4.17029	0.091002
P55547@8			1.73298	2109226000	0.0150153	0.00201601	0.00789845	2018-11-15	09:49:00	307	-6312	0.00201435	4.56294	0.0789845
P55547@9			1.72876	2103212000	0.0415929	0.00201632	0.0075946	2018-11-15	09:52:00	436	-5876	0.00201466	4.71791	0.075946
P63993@01			1.8727	2238912000	0.038258	0.00201482	0.00848092	2018-11-15	10:57:00	1090	3055	0.00201268	3.73041	0.0848092
P63993@2			1.87208	2232715000	0.0464193	0.00201525	0.00869621	2018-11-15	11:00:00	1531	2890	0.00201311	3.94463	0.086962
P63993@3			1.8677	2267364000	0.0951672	0.00201495	0.00772474	2018-11-15	11:03:00	1316	2029	0.00201281	3.79567	0.0772474
P63993@4			1.86418	2239637000	0.0301243	0.00201504	0.00751519	2018-11-15	11:06:00	1322	1518	0.0020129	3.84101	0.0751519
P63993@5			1.86214	2237838000	0.0456807	0.00201512	0.00718478	2018-11-15	11:09:00	1539	1205	0.00201299	3.88286	0.0718478
P63993@6			1.86097	2239862000	0.038785	0.00201524	0.00662613	2018-11-15	11:12:00	1663	822	0.00201311	3.94363	0.0662613
P63993@7			1.85839	2239605000	0.048425	0.0020152	0.00944415	2018-11-15	11:15:00	1703	516	0.00201306	3.92121	0.0944415
P63993@8			1.85823	2248054000	0.0343996	0.00201542	0.00967435	2018-11-15	11:18:00	1693	210	0.00201329	4.0333	0.0967435
P65148@01			1.85354	2198493000	0.0486682	0.00201982	0.00812086	2018-11-15	11:22:00	-933	2782	0.00201768	6.22428	0.0812086
P65148@2			1.85494	2202296000	0.039099	0.00201988	0.00665839	2018-11-15	11:25:00	-576	2540	0.00201774	6.25317	0.0665839
P65148@3			1.8497	2193059000	0.0327471	0.00201974	0.00557429	2018-11-15	11:28:00	-550	2786	0.0020176	6.18243	0.0557429
P65148@4			1.84149	2193286000	0.034747	0.00202001	0.00810952	2018-11-15	11:31:00	-1005	1516	0.00201787	6.31793	0.0810952
P65148@5			1.8411	2197959000	0.0531174	0.0020198	0.00947382	2018-11-15	11:34:00	-735	1682	0.00201766	6.21332	0.0947382
P65148@6			1.83813	2203923000	0.0303765	0.00201983	0.00766647	2018-11-15	11:37:00	-290	1108	0.00201769	6.22926	0.0766647
P65148@7			1.83476	2192664000	0.0362025	0.00202003	0.0083204	2018-11-15	11:40:00	-869	854	0.00201789	6.3264	0.083204
P65148@8			1.83226	2203929000	0.0262472	0.00202063	0.00832217	2018-11-15	11:44:00	-303	319	0.00201849	6.6263	0.0832217
OU49114@01			1.82561	2152125000	0.0390241	0.00201772	0.011037	2018-11-15	11:47:00	-2757	2101	0.00201558	5.17662	0.11037
OU49114@2			1.8249	2156811000	0.0282929	0.00201782	0.00757183	2018-11-15	11:50:00	-2583	1965	0.00201568	5.22743	0.0757183
OU49114@3			1.82256	2155037000	0.0363476	0.00201833	0.00971644	2018-11-15	11:53:00	-3023	1786	0.00201619	5.48	0.0971644
OU49114@4			1.82271	2172608000	0.0402996	0.00201852	0.00879548	2018-11-15	11:57:00	-1799	1523	0.00201638	5.57615	0.0879547
OU49114@5			1.8001	2144343000	0.0459296	0.00201783	0.00719613	2018-11-15	12:21:00	-2133	1109	0.0020157	5.2344	0.0719613
OU49114@6			1.79854	2128379000	0.0304769	0.00201805	0.00603884	2018-11-15	12:24:00	-2964	1101	0.00201591	5.34201	0.0603884
OU49114@7			1.79612	2129038000	0.0338202	0.00201773	0.00882506	2018-11-15	12:27:00	-3120	1413	0.0020156	5.18409	0.0882506
OU49114@8			1.7969	2129719000	0.0378733	0.0020179	0.00864351	2018-11-15	12:30:00	-3468	1283	0.00201577	5.26928	0.0864351
P64865@01			1.79212	2169928000	0.0359919	0.00201556	0.00758626	2018-11-15	12:33:00	-2675	-2581	0.00201343	4.10305	0.0758626
P64865@2			1.79244	2173416000	0.0218664	0.00201522	0.00709356	2018-11-15	12:36:00	-2302	-2620	0.00201309	3.93267	0.0709356
P64865@3			1.79079	2153037000	0.0245024	0.00201546	0.0080144	2018-11-15	12:40:00	-3449	-3006	0.00201332	4.04974	0.080144
P64865@4			1.78845	2142965000	0.02846	0.00201511	0.0101344	2018-11-15	12:42:00	-3953	-2966	0.00201298	3.87787	0.101344
P64865@5			1.78618	2144669000	0.0431617	0.00201535	0.00677881	2018-11-15	12:45:00	-3877	-3278	0.00201321	3.99594	0.0677881
P64865@6			1.78618	2160861000	0.0275329	0.00201529	0.00995613	2018-11-15	12:49:00	-3181	-3910	0.00201316	3.96954	0.0995613
P64865@7			1.78469	2157733000	0.0297758	0.00201533	0.00767667	2018-11-15	12:51:00	-3214	-4166	0.0020132	3.98747	0.0767667
P64865@8			1.77867	2164571000	0.0387239	0.00201589	0.00810398	2018-11-15	12:55:00	-2518	-4249	0.00201375	4.26396	0.0810398
P75062@01			1.77523	2169137000	0.0351584	0.0020187	0.00998087	2018-11-15	12:58:00	-1246	-3941	0.00201656	5.66732	0.0998087
P75062@2			1.77405	2163479000	0.0306796	0.00201935	0.00633188	2018-11-15	13:01:00	-998	-4225	0.00201721	5.98715	0.0633188
P75062@3			1.76991	2166287000	0.027342	0.00201836	0.00936032	2018-11-15	13:04:00	-845	-4545	0.00201622	5.49744	0.0936032
P75062@4			1.77092	2164158000	0.0371165	0.00201898	0.00900899	2018-11-15	13:07:00	-1142	-4498	0.00201684	5.80581	0.0900898
P75062@5			1.77116	2163286000	0.0300396	0.00201826	0.0112384	2018-11-15	13:10:00	-1384	-4323	0.00201612	5.44812	0.112384
P75062@6			1.7685	2174801000	0.0267193	0.00201933	0.0079535	2018-11-15	13:14:00	-1248	-6243	0.00201719	5.97718	0.079535
P75062@7			1.76787	2170867000	0.0189708	0.00201679	0.0110133	2018-11-15	13:17:00	-577	-6026	0.00201466	4.71531	0.110133
P75062@8			1.76357	2163201000	0.0323507	0.00201922	0.00935905	2018-11-15	13:20:00	-773	-5805	0.00201708	5.92487	0.0935905
OU81999@01			1.88389	2307308000	0.0354412	0.00201645	0.00702014	2018-11-15	14:15:00	463	-2651	0.0020142	4.48839	0.0702014
OU81999@2			1.87708	2306833000	0.0370068	0.00201678	0.00730367	2018-11-15	14:18:00	554	-2881	0.00201453	4.65527	0.0730367
OU81999@3			1.8756	2313646000	0.0290649	0.00201697	0.00629127	2018-11-15	14:21:00	1305	-3149	0.00201472	4.74992	0.0629127
OU81999@4			1.87083	2317784000	0.0326756	0.00201737	0.00621097	2018-11-15	14:24:00	1237	-3751	0.00201513	4.94968	0.0621097
OU81999@5			1.86433	2314333000	0.0376114	0.00201698	0.00905791	2018-11-15	14:28:00	1000	-4676	0.00201473	4.75391	0.0905791
OU81999@6			1.86824	2311842000	0.0373249	0.00201707	0.00696856	2018-11-15	14:31:00	644	-4767	0.00201482	4.79824	0.0696856
OU81999@7			1.8691	2315154000	0.0329825	0.00201699	0.00949052	2018-11-15	14:34:00	256	-4726	0.00201474	4.75789	0.0949052
OU81999@8			1.87012	2309393000	0.0364024	0.00201703	0.00627591	2018-11-15	14:37:00	310	-4416	0.00201478	4.77832	0.0627591
OU81999@9			1.86488	2303435000	0.0270009	0.00201684	0.00737945	2018-11-15	14:40:00	515	-4953	0.00201459	4.68466	0.0737945
OU81999@10			1.85925	2310885000	0.0298512	0.00201697	0.0082528	2018-11-15	14:43:00	1084	-5204	0.00201472	4.74892	0.082528
OU49210@01			1.85275	2301570000	0.0451152	0.00201987	0.00814657	2018-11-15	14:47:00	2099	-4991	0.00201762	6.19554	0.0814658
OU49210@2			1.84908	2308667000	0.0269466	0.00201961	0.00633138	2018-11-15	14:50:00	2301	-5223	0.00201736	6.06354	0.0633138
OU49210@3			1.85268	2297157000	0.0299386	0.00201911	0.00855655	2018-11-15	14:53:00	2011	-4567	0.00201686	5.81546	0.0855655
OU49210@4			1.85088	2296936000	0.0271717	0.0020195	0.00775726	2018-11-15	14:56:00	2113	-3980	0.00201724	6.00675	0.0775726
OU49210@5			1.85205	2291782000	0.0416856	0.00201929	0.00653005	2018-11-15	14:58:00	2392	-3953	0.00201704	5.90612	0.0653005
OU49210@6			1.84986	2293087000	0.0298405	0.00201972	0.00727162	2018-11-15	15:02:00	2466	-3285	0.00201747	6.11684	0.0727162
OU49210@7			1.8508	2285238000	0.0358565	0.00201968	0.00921518	2018-11-15	15:04:00	2570	-3011	0.00201743	6.1004	0.0921518
OU49210@8			1.8483	2285504000	0.0187824	0.00201938	0.00879704	2018-11-15	15:07:00	2417	-2727	0.00201712	5.94697	0.0879704
P58446@01			1.84079	2290102000	0.024516	0.00201519	0.00912173	2018-11-15	15:11:00	3365	-4138	0.00201295	3.86272	0.0912173
P58446@2			1.835	2280967000	0.0319715	0.00201374	0.00782141	2018-11-15	15:14:00	3484	-4024	0.00201149	3.13742	0.0782141
P58446@3			1.81145	2255504000	0.0232214	0.00201553	0.00748779	2018-11-15	15:38:00	4007	-4187	0.00201329	4.03309	0.0748779
P58446@4			1.81074	2250174000	0.0269143	0.00201526	0.0116569	2018-11-15	15:41:00	3819	-4024	0.00201302	3.89809	0.116569
P58446@5			1.80887	2247727000	0.0360415	0.00201576	0.00611038	2018-11-15	15:44:00	4119	-3905	0.00201351	4.14318	0.0611038
P58446@6			1.80613	2246957000	0.0368945	0.00201362	0.00695946	2018-11-15	15:47:00	3998	-3812	0.00201137	3.07764	0.0695946
P58446@7			1.80754	2252357000	0.0261245	0.00201484	0.00606326	2018-11-15	15:50:00	3993	-3620	0.00201259	3.68787	0.0606326
P58446@8			1.8073	2252770000	0.0470021	0.00201451	0.00628895	2018-11-15	15:53:00	4694	-3298	0.00201226	3.52049	0.0628895
OU82035@01			1.87669	2267710000	0.0409126	0.00201724	0.00765452	2018-11-15	17:20:00	1586	2905	0.00201533	5.0541	0.0765452
OU82035@2			1.87568	2259051000	0.0320137	0.0020179	0.0086336	2018-11-15	17:23:00	1668	2652	0.00201599	5.38044	0.086336
OU82035@3			1.87568	2261161000	0.0505667	0.00201716	0.0082924	2018-11-15	17:26:00	1086	2549	0.00201525	5.01424	0.082924
OU82035@4			1.87599	2271304000	0.0267681	0.0020176	0.00972007	2018-11-15	17:29:00	1246	2332	0.00201569	5.23097	0.0972007
OU82035@5			1.87411	2274217000	0.0335113	0.00201786	0.00692374	2018-11-15	17:32:00	1717	1870	0.00201596	5.364	0.0692374
OU82035@6			1.87372	2290352000	0.0300904	0.00201738	0.00718408	2018-11-15	17:35:00	1700	1341	0.00201547	5.12186	0.0718408
OU82035@7			1.87654	2281242000	0.0264069	0.00201746	0.00971267	2018-11-15	17:38:00	1255	838	0.00201555	5.16072	0.0971267
OU82035@8			1.87153	2278163000	0.027537	0.00201718	0.00591514	2018-11-15	17:41:00	1038	876	0.00201528	5.0257	0.0591514
P89615@01			1.86738	2278422000	0.0307512	0.00201532	0.00903563	2018-11-15	17:44:00	41	474	0.00201341	4.0965	0.0903563
P89615@2			1.8648	2267006000	0.0254859	0.00201517	0.00790368	2018-11-15	17:48:00	-211	627	0.00201327	4.02326	0.0790368
P89615@3			1.86402	2259230000	0.0429899	0.00201518	0.00750939	2018-11-15	17:50:00	-221	710	0.00201327	4.02575	0.0750939
P89615@4			1.85987	2256258000	0.0365472	0.00201578	0.00685081	2018-11-15	17:53:00	11	807	0.00201388	4.32817	0.0685081
P89615@5			1.85987	2252909000	0.0281395	0.00201593	0.00864507	2018-11-15	17:56:00	-364	812	0.00201402	4.39793	0.0864507
P89615@6			1.85854	2247907000	0.0362109	0.00201542	0.0079818	2018-11-15	17:59:00	35	1394	0.00201351	4.14383	0.079818
P89615@7			1.8576	2244331000	0.0318416	0.00201446	0.00864064	2018-11-15	18:02:00	-116	1648	0.00201256	3.66852	0.0864064
P89615@8			1.85416	2236115000	0.0302738	0.00201462	0.00819504	2018-11-15	18:05:00	-318	1963	0.00201271	3.74724	0.0819504
P66692@01			1.8515	2205205000	0.0192709	0.00201548	0.00883388	2018-11-15	18:09:00	-2744	1905	0.00201357	4.17571	0.0883388
P66692@2			1.84478	2221982000	0.0301624	0.0020227	0.00713504	2018-11-15	18:12:00	-2707	714	0.00202079	7.77494	0.0713504
P66692@3			1.84634	2223271000	0.0399283	0.00201523	0.00757809	2018-11-15	18:15:00	-2966	522	0.00201333	4.05215	0.0757809
P66692@4			1.84861	2229363000	0.0418652	0.00201553	0.00874103	2018-11-15	18:18:00	-2584	241	0.00201363	4.20262	0.0874103
P66692@5			1.82631	2198514000	0.0336058	0.00201525	0.00939559	2018-11-15	18:42:00	-3546	522	0.00201334	4.06013	0.0939559
P66692@6			1.82819	2200134000	0.0230108	0.00201546	0.00780963	2018-11-15	18:45:00	-3153	-80	0.00201355	4.16575	0.0780963
P66692@7			1.82631	2190225000	0.0287464	0.00201447	0.00798987	2018-11-15	18:48:00	-3650	-74	0.00201257	3.6735	0.0798987
P66692@8			1.82099	2194946000	0.0282335	0.00201544	0.00842371	2018-11-15	18:51:00	-3093	-576	0.00201353	4.15628	0.0842371
P63568@01			1.81872	2209981000	0.0243064	0.00201838	0.00838242	2018-11-15	18:55:00	-3276	-1506	0.00201647	5.61859	0.0838242
P63568@2			1.81724	2221526000	0.0379937	0.00201853	0.00809782	2018-11-15	18:58:00	-3199	-1774	0.00201662	5.69731	0.0809782
P63568@3			1.82545	2232111000	0.02622	0.00201756	0.010155	2018-11-15	19:01:00	-3116	-2107	0.00201565	5.21353	0.10155
P63568@4			1.82483	2237274000	0.0294772	0.00201728	0.0075217	2018-11-15	19:04:00	-3147	-2311	0.00201537	5.07353	0.075217
P63568@5			1.82764	2221562000	0.0192491	0.00201822	0.00707662	2018-11-15	19:07:00	-3439	-2725	0.00201631	5.54037	0.0707662
P63568@6			1.82498	2226295000	0.0283489	0.00201808	0.00790135	2018-11-15	19:10:00	-3562	-2884	0.00201617	5.46962	0.0790135
P63568@7			1.82428	2226186000	0.0290153	0.00201777	0.0088622	2018-11-15	19:13:00	-3699	-2730	0.00201586	5.31716	0.088622
P63568@8			1.82037	2209353000	0.0184536	0.00201773	0.00811888	2018-11-15	19:16:00	-4154	-2242	0.00201582	5.29773	0.0811888
P84559@01			1.81129	2243287000	0.0183784	0.00202845	0.00937938	2018-11-15	19:20:00	-2384	-4959	0.00202653	10.6363	0.0937938
P84559@2			1.81027	2231918000	0.0275804	0.00202821	0.0101794	2018-11-15	19:23:00	-2338	-4037	0.00202629	10.5192	0.101794
P84559@3			1.81035	2226772000	0.033269	0.00202017	0.0085813	2018-11-15	19:26:00	-2189	-3991	0.00201826	6.51292	0.085813
P84559@4			1.80855	2235238000	0.0323918	0.00202844	0.00525905	2018-11-15	19:29:00	-1899	-3592	0.00202652	10.6313	0.0525905
P84559@5			1.8109	2250634000	0.062761	0.00202731	0.0080645	2018-11-15	19:32:00	-1593	-3418	0.00202539	10.0698	0.080645
P84559@6			1.80902	2224710000	0.024264	0.00202808	0.00744696	2018-11-15	19:35:00	-1814	-3396	0.00202616	10.4549	0.0744696
P84559@7			1.80621	2226897000	0.034388	0.00202034	0.00874678	2018-11-15	19:38:00	-1524	-2817	0.00201843	6.59862	0.0874678
P84559@8			1.80597	2210196000	0.0173488	0.0020253	0.0062538	2018-11-15	19:41:00	-1982	-2605	0.00202339	9.06985	0.062538
P84559@9			1.80386	2228855000	0.0346621	0.00202504	0.00971479	2018-11-15	19:44:00	-2282	-3439	0.00202312	8.93781	0.0971479
2018-11-16
P89622@01			1.83288	2236541000	0.0139504	0.0020149	0.00934133	2018-11-16	08:31:00	1260	-3495	0.00201322	4.00102	0.0934133
P89622@2			1.82662	2247612000	0.0626632	0.00201591	0.00717733	2018-11-16	08:34:00	1409	-3757	0.00201424	4.50678	0.0717733
P89622@3			1.82803	2228410000	0.0434528	0.00201458	0.00999982	2018-11-16	08:37:00	1049	-3958	0.00201291	3.84555	0.0999982
P89622@4			1.82224	2219353000	0.0179505	0.00201489	0.00781025	2018-11-16	08:40:00	593	-3616	0.00201321	3.99553	0.0781025
P89622@5			1.80871	2232217000	0.0301927	0.00201411	0.00649105	2018-11-16	08:43:00	1053	-3737	0.00201243	3.60737	0.0649105
P89622@6			1.80104	2218345000	0.0176919	0.00201498	0.0097901	2018-11-16	08:46:00	1189	-4468	0.0020133	4.04038	0.097901
P89622@7			1.79619	2202186000	0.0416249	0.00201476	0.0102706	2018-11-16	08:49:00	984	-4700	0.00201309	3.93275	0.102706
P89622@8			1.79385	2201517000	0.030285	0.00201536	0.00741788	2018-11-16	08:52:00	1462	-4805	0.00201369	4.23172	0.0741788
P89622@9			1.78438	2188555000	0.0252655	0.00201523	0.0067239	2018-11-16	08:55:00	940	-5328	0.00201356	4.16944	0.067239
P89622@10			1.77843	2185185000	0.0746811	0.0020147	0.00847123	2018-11-16	08:58:00	619	-5941	0.00201303	3.90485	0.0847123
P57426@01			1.77116	2186370000	0.0373332	0.00201412	0.00868132	2018-11-16	09:03:00	3910	-4562	0.00201245	3.61335	0.0868132
P57426@2			1.76928	2180687000	0.0330856	0.00201415	0.00768386	2018-11-16	09:06:00	3810	-4045	0.00201248	3.63029	0.0768386
P57426@3			1.76858	2173322000	0.0459894	0.00201452	0.00792118	2018-11-16	09:09:00	3848	-3857	0.00201284	3.81216	0.0792118
P57426@4			1.76427	2167669000	0.0405943	0.00201389	0.0101346	2018-11-16	09:12:00	3724	-3778	0.00201222	3.50123	0.101346
P57426@5			1.75966	2166132000	0.0375918	0.00201427	0.00904291	2018-11-16	09:15:00	4074	-3911	0.0020126	3.68958	0.0904291
P57426@6			1.75841	2158097000	0.0304413	0.00201437	0.00666622	2018-11-16	09:18:00	3810	-3404	0.00201269	3.73742	0.0666622
P57426@7			1.75004	2146659000	0.036782	0.00201421	0.00852386	2018-11-16	09:21:00	3999	-3717	0.00201254	3.65969	0.0852386
P57426@8			1.74628	2114733000	0.0760267	0.00201411	0.00757107	2018-11-16	09:24:00	3964	-4246	0.00201244	3.61185	0.0757107
OU81937@01			1.7383	2060495000	0.0371451	0.00201655	0.00824581	2018-11-16	09:28:00	-1244	2108	0.00201487	4.82419	0.0824581
OU81937@2			1.73807	2045898000	0.0361169	0.00201571	0.00671611	2018-11-16	09:31:00	-1475	2416	0.00201404	4.40862	0.0671611
OU81937@3			1.86026	2203892000	0.0638407	0.00201416	0.00659663	2018-11-16	10:30:00	-1270	1869	0.00201242	3.60098	0.0659663
OU81937@4			1.85807	2208621000	0.0145482	0.00201552	0.00774266	2018-11-16	10:33:00	-1127	1029	0.00201378	4.28013	0.0774266
OU81937@5			1.85721	2230970000	0.0569566	0.0020152	0.00767142	2018-11-16	10:36:00	-1249	728	0.00201346	4.12168	0.0767142
OU81937@6			1.8569	2219894000	0.113938	0.00201327	0.0122615	2018-11-16	10:39:00	-1438	954	0.00201154	3.16001	0.122615
OU81937@7			1.85213	2200757000	0.0292732	0.00201487	0.0055477	2018-11-16	10:42:00	-1746	745	0.00201313	3.95675	0.055477
OU81937@8			1.85025	2210068000	0.0400281	0.00201516	0.00995203	2018-11-16	10:45:00	-1374	177	0.00201342	4.10175	0.0995203
OU81941@01			1.84243	2252847000	0.0336414	0.00201328	0.00781258	2018-11-16	10:49:00	-218	-3768	0.00201154	3.162	0.0781258
OU81941@2			1.84008	2252238000	0.0382473	0.00201355	0.00637396	2018-11-16	10:52:00	-305	-4391	0.00201181	3.29604	0.0637396
OU81941@3			1.8393	2251315000	0.0409826	0.00201338	0.01039	2018-11-16	10:55:00	-397	-4756	0.00201164	3.21382	0.1039
OU81941@4			1.84204	2257180000	0.0205901	0.00201321	0.00882453	2018-11-16	10:58:00	-162	-4688	0.00201148	3.13061	0.0882453
OU81941@5			1.83922	2246733000	0.0384316	0.00201531	0.00905844	2018-11-16	11:01:00	-261	-4880	0.00201357	4.17599	0.0905844
OU81941@6			1.83562	2236895000	0.0331928	0.00201525	0.00557883	2018-11-16	11:04:00	-665	-4710	0.00201351	4.14609	0.0557884
OU81941@7			1.83132	2237264000	0.0316774	0.00201322	0.00658138	2018-11-16	11:07:00	-723	-5326	0.00201149	3.1351	0.0658138
OU81941@8			1.82717	2243974000	0.057489	0.00201315	0.00877219	2018-11-16	11:11:00	-654	-5899	0.00201142	3.10022	0.0877219
P78003@01			1.82318	2196881000	0.0392787	0.00201421	0.00728009	2018-11-16	11:15:00	2981	2378	0.00201247	3.6249	0.0728009
P78003@2			1.82608	2201797000	0.0405681	0.00201442	0.00692511	2018-11-16	11:18:00	2824	2124	0.00201268	3.73053	0.0692511
P78003@3			1.82256	2192130000	0.0652568	0.00201392	0.00755294	2018-11-16	11:21:00	2875	2051	0.00201219	3.48389	0.0755294
P78003@4			1.82287	2196205000	0.0424686	0.00201478	0.00976344	2018-11-16	11:24:00	2782	1730	0.00201305	3.9129	0.0976344
P78003@5			1.8217	2200945000	0.0336396	0.00201425	0.00791669	2018-11-16	11:27:00	3229	1680	0.00201252	3.64932	0.0791669
P78003@6			1.81778	2199970000	0.0364389	0.00201433	0.00794326	2018-11-16	11:31:00	2742	1250	0.00201259	3.68469	0.0794326
P78003@7			1.79791	2195399000	0.155097	0.00201433	0.0110989	2018-11-16	11:54:00	2774	1376	0.00201259	3.68619	0.110989
P78003@8			1.79596	2179501000	0.0320534	0.00201444	0.00831586	2018-11-16	11:57:00	2980	1074	0.0020127	3.741	0.0831586
P78003@9			1.7969	2183757000	0.0409347	0.00201461	0.007473	2018-11-16	12:00:00	2968	241	0.00201288	3.82869	0.07473
P78003@10			1.79854	2201385000	0.0553464	0.00201422	0.00628848	2018-11-16	12:03:00	2962	92	0.00201248	3.62938	0.0628848
OU84944@01			1.79299	2191507000	0.040653	0.0020206	0.00618226	2018-11-16	12:07:00	4197	765	0.00201886	6.81335	0.0618226
OU84944@2			1.79291	2186340000	0.0349961	0.00202026	0.0066872	2018-11-16	12:10:00	4234	655	0.00201852	6.64145	0.066872
OU84944@3			1.79142	2177319000	0.0355051	0.00202016	0.00795845	2018-11-16	12:13:00	4346	1002	0.00201842	6.59062	0.0795845
OU84944@4			1.789	2168493000	0.0309991	0.0020171	0.00792765	2018-11-16	12:16:00	4119	1178	0.00201536	5.0684	0.0792765
OU84944@5			1.78665	2172793000	0.0524599	0.00201966	0.00771309	2018-11-16	12:19:00	3990	1565	0.00201791	6.34099	0.0771309
OU84944@6			1.78454	2171730000	0.0390086	0.00201627	0.00929489	2018-11-16	12:22:00	4178	508	0.00201453	4.65084	0.0929489
OU84944@7			1.78704	2176600000	0.0319582	0.00201973	0.00846625	2018-11-16	12:25:00	4179	281	0.00201799	6.37985	0.0846625
OU84944@8			1.78219	2188181000	0.216274	0.00201686	0.00781481	2018-11-16	12:28:00	4327	460	0.00201512	4.94632	0.0781481
OU84944@9			1.78532	2158348000	0.11156	0.00201536	0.0103654	2018-11-16	12:31:00	3926	482	0.00201362	4.19841	0.103654
OU84944@10			1.78133	2168291000	0.0777984	0.00201581	0.00770891	2018-11-16	12:34:00	4292	-97	0.00201407	4.42413	0.0770891
OU84944@11			1.7775	2161607000	0.124029	0.00201482	0.00890141	2018-11-16	12:37:00	4121	1127	0.00201308	3.93034	0.0890141
P59963@01			1.77218	2188001000	0.0825344	0.00199359	0.0071027	2018-11-16	12:41:00	4330	-1970	0.00199187	-6.64601	0.071027
P59963@2			1.77554	2166544000	0.100923	0.00199242	0.00684548	2018-11-16	12:45:00	4096	-2245	0.0019907	-7.22948	0.0684548
P59963@3			1.77617	2173585000	0.067535	0.0019977	0.00966131	2018-11-16	12:47:00	4270	-1981	0.00199597	-4.60159	0.0966131
P59963@4			1.77218	2177861000	0.133051	0.00199163	0.0085678	2018-11-16	12:50:00	4530	-1648	0.00198992	-7.62212	0.085678
P59963@5			1.77523	2219184000	0.0598069	0.00199241	0.00687271	2018-11-16	12:53:00	4570	-1707	0.00199069	-7.23447	0.0687271
P59963@6			1.7739	2174238000	0.0751941	0.0019919	0.0120398	2018-11-16	12:57:00	4190	-2194	0.00199018	-7.48958	0.120398
P89606@01			1.87388	2291423000	0.0347409	0.00201999	0.00780441	2018-11-16	14:00:00	1816	2587	0.00201776	6.31963	0.0780441	0.0570711
P89606@2			1.87411	2282018000	0.0187002	0.00201684	0.00727798	2018-11-16	14:03:00	1125	2556	0.00201461	4.74513	0.0727798	0.0532451
P89606@3			1.87403	2282266000	0.0318847	0.00201546	0.00692523	2018-11-16	14:06:00	1398	2212	0.00201323	4.05535	0.0692523	0.0494191
P89606@4			1.87419	2289746000	0.0289846	0.00201582	0.00791554	2018-11-16	14:10:00	1596	1922	0.00201359	4.22958	0.0791554	0.0443178
P89606@5			1.87364	2287001000	0.0459096	0.00201456	0.00863005	2018-11-16	14:13:00	1034	1676	0.00201233	3.59509	0.0863005	0.0404918
P89606@6			1.87239	2297449000	0.0243333	0.00201557	0.00686328	2018-11-16	14:16:00	1229	843	0.00201334	4.09789	0.0686328	0.0366658
P89606@7			1.87043	2294067000	0.0291342	0.0020149	0.00567079	2018-11-16	14:19:00	1704	862	0.00201268	3.7608	0.0567079	0.0328398
P89606@8			1.86817	2298645000	0.0426192	0.00201569	0.00685493	2018-11-16	14:22:00	1680	360	0.00201346	4.14603	0.0685493	0.0290138
P89606@9			1.86981	2298512000	0.0261305	0.00201517	0.00788554	2018-11-16	14:25:00	1129	425	0.00201294	3.88466	0.0788554	0.0251878
P89606@10			1.86605	2298995000	0.03495	0.00201454	0.00871388	2018-11-16	14:28:00	1070	-75	0.00201231	3.5675	0.0871388	0.0213618
P89568@01			1.86699	2295065000	0.0277592	0.00202266	0.00816021	2018-11-16	14:31:00	25	-147	0.00202043	7.61115	0.0816021	0.0175358
P89568@2			1.86504	2292868000	0.0301066	0.00202235	0.0085502	2018-11-16	14:34:00	136	-456	0.00202011	7.45141	0.085502	0.0137098
P89568@3			1.86777	2293931000	0.0310215	0.00202194	0.00780006	2018-11-16	14:37:00	-14	-546	0.0020197	7.24085	0.0780006	0.00988382
P89568@4			1.86668	2285214000	0.0249061	0.00202305	0.00751529	2018-11-16	14:40:00	92	212	0.00202081	7.79296	0.0751529	0.00605782
P89568@5			1.86363	2281490000	0.0311017	0.00202249	0.00942657	2018-11-16	14:43:00	362	713	0.00202025	7.50917	0.0942657	0.00223183
P89568@6			1.86167	2274265000	0.0348518	0.00202219	0.0100519	2018-11-16	14:46:00	419	942	0.00201996	7.35789	0.100519	-0.00159416
P89568@7			1.86003	2284774000	0.0290681	0.00202233	0.0090524	2018-11-16	14:49:00	261	65	0.00202009	7.42132	0.090524	-0.00542016
P89568@8			1.85862	2268495000	0.039887	0.00202264	0.00749335	2018-11-16	14:52:00	-230	2219	0.0020204	7.56992	0.0749335	-0.00924615
P89568@9			1.86003	2264139000	0.0384589	0.0020224	0.00854638	2018-11-16	14:55:00	273	1826	0.00202016	7.44754	0.0854638	-0.0130721
P89568@10			1.858	2254404000	0.0291255	0.00202176	0.00960032	2018-11-16	14:59:00	-108	2656	0.00201953	7.12711	0.0960032	-0.0181735
P70806@01			1.84399	2268229000	0.0330189	0.00201729	0.00664337	2018-11-16	15:23:00	-1354	-843	0.00201506	4.86677	0.0664337	-0.0487814
P70806@2			1.84274	2259609000	0.0305677	0.00201708	0.00776136	2018-11-16	15:26:00	-1546	-1015	0.00201484	4.75684	0.0776136	-0.0526074
P70806@3			1.8418	2262214000	0.0219955	0.00201704	0.00864007	2018-11-16	15:29:00	-1221	-563	0.00201481	4.73408	0.0864007	-0.0564334
P70806@4			1.84157	2251891000	0.0335554	0.00201674	0.00992782	2018-11-16	15:32:00	-1805	-502	0.00201451	4.5838	0.0992782	-0.0602594
P70806@5			1.8429	2249316000	0.0316789	0.00201896	0.00830325	2018-11-16	15:35:00	-1654	-502	0.00201673	5.68537	0.0830325	-0.0640854
P70806@6			1.83805	2244199000	0.0314599	0.0020169	0.00964981	2018-11-16	15:38:00	-1452	1046	0.00201467	4.65486	0.0964981	-0.0679114
P70806@7			1.83797	2234743000	0.0331345	0.00201688	0.00636351	2018-11-16	15:41:00	-1129	1397	0.00201464	4.63808	0.063635	-0.0717374
P70806@8			1.8382	2234101000	0.028918	0.00201696	0.00610996	2018-11-16	15:44:00	-1405	1587	0.00201473	4.67809	0.0610996	-0.0755634
P89654@01			1.83476	2234191000	0.0306731	0.00202343	0.00712511	2018-11-16	15:47:00	-2807	871	0.00202119	7.89581	0.0712511	-0.0793894
P89654@2			1.83476	2232516000	0.0354838	0.00202344	0.00925533	2018-11-16	15:50:00	-3110	551	0.0020212	7.89597	0.0925533	-0.0832154
P89654@3			1.83335	2232067000	0.0211165	0.00202359	0.0108715	2018-11-16	15:53:00	-3519	-68	0.00202135	7.96637	0.108715	-0.0870414
P89654@4			1.83421	2234357000	0.0358854	0.00202356	0.00746761	2018-11-16	15:56:00	-3760	-172	0.00202133	7.95109	0.0746761	-0.0908674
P89654@5			1.8364	2219870000	0.0319083	0.00202335	0.00927981	2018-11-16	15:59:00	-3977	42	0.00202111	7.84215	0.0927981	-0.0946934
P89654@6			1.83226	2222460000	0.0188016	0.0020234	0.00938917	2018-11-16	16:02:00	-4095	-175	0.00202116	7.86024	0.0938917	-0.0985194
P89654@7			1.83054	2226079000	0.0260699	0.00202345	0.00858751	2018-11-16	16:05:00	-3874	-583	0.00202121	7.88083	0.0858751	-0.102345
P74205@01			1.82576	2250109000	0.0239071	0.00202161	0.00880847	2018-11-16	16:09:00	-3254	-2679	0.00201937	6.96162	0.0880847	-0.107447
P74205@2			1.82342	2243671000	0.0315024	0.00202187	0.0101617	2018-11-16	16:12:00	-3573	-2893	0.00201964	7.08831	0.101617	-0.111273
P74205@3			1.82623	2235641000	0.0178377	0.00202228	0.00644101	2018-11-16	16:15:00	-3941	-2649	0.00202005	7.28822	0.0644101	-0.115099
P74205@4			1.82553	2239446000	0.0263755	0.00202157	0.00773671	2018-11-16	16:18:00	-4080	-2585	0.00201934	6.93221	0.0773671	-0.118925
P74205@5			1.82592	2234244000	0.0215706	0.00202198	0.00953711	2018-11-16	16:21:00	-4258	-2892	0.00201974	7.12864	0.0953711	-0.122751
P74205@6			1.86918	2292917000	0.0216443	0.00202108	0.00798577	2018-11-16	17:19:00	-4503	-2821	0.00201872	6.74031	0.0798577
P74205@7			1.87043	2295728000	0.0359233	0.00202554	0.00686203	2018-11-16	17:22:00	-4182	-3225	0.00202318	8.96492	0.0686203
P89633@01			1.87169	2346215000	0.0572111	0.00202026	0.00641649	2018-11-16	17:25:00	-1482	-3506	0.0020179	6.33384	0.0641649
P89633@2			1.87083	2320875000	0.0315081	0.00202124	0.00612597	2018-11-16	17:28:00	-1095	-3776	0.00201888	6.822	0.0612597
P89633@3			1.86777	2321860000	0.0427454	0.00202069	0.00720307	2018-11-16	17:31:00	-2019	-4203	0.00201833	6.54704	0.0720307
P89633@4			1.8709	2313231000	0.054585	0.00202077	0.0108301	2018-11-16	17:34:00	-1993	-4461	0.00201841	6.58938	0.108301
P89633@5			1.8695	2324971000	0.034203	0.00202042	0.00577647	2018-11-16	17:37:00	-1797	-4481	0.00201806	6.41454	0.0577647
P89633@6			1.86809	2317205000	0.0315322	0.00201985	0.00681967	2018-11-16	17:40:00	-1680	-4873	0.00201749	6.12812	0.0681967
P89633@7			1.86605	2314822000	0.0107577	0.00202184	0.00896722	2018-11-16	17:43:00	-2274	-5415	0.00201948	7.11988	0.0896722
P89633@8			1.86292	2320288000	0.02879	0.00202364	0.00626019	2018-11-16	17:46:00	-1603	-5514	0.00202127	8.0165	0.0626019
OU49109@01			1.86238	2325429000	0.0332691	0.0020178	0.00866259	2018-11-16	17:50:00	972	-3678	0.00201544	5.10548	0.0866259
OU49109@2			1.86167	2324184000	0.0223804	0.00201796	0.0069706	2018-11-16	17:53:00	994	-3967	0.0020156	5.18617	0.069706
OU49109@3			1.86238	2324589000	0.0269399	0.00201847	0.00941025	2018-11-16	17:55:00	1326	-3843	0.00201611	5.44121	0.0941025
OU49109@4			1.85886	2318797000	0.0154051	0.00201835	0.00943268	2018-11-16	17:58:00	837	-4167	0.002016	5.38443	0.0943268
OU49109@5			1.84963	2315138000	0.031038	0.00201819	0.00757813	2018-11-16	18:02:00	1147	-5411	0.00201583	5.30074	0.0757813
OU49109@6			1.85056	2318817000	0.0216527	0.00201834	0.00789458	2018-11-16	18:05:00	1433	-5392	0.00201598	5.37696	0.0789458
OU49109@7			1.84783	2306771000	0.0265887	0.002018	0.00750177	2018-11-16	18:08:00	647	-5533	0.00201564	5.2066	0.0750177
OU49109@8			1.84501	2303094000	0.0217205	0.00201813	0.00586539	2018-11-16	18:11:00	847	-6031	0.00201578	5.27384	0.0586539
OU49213@01			1.83742	2306238000	0.0181251	0.0020206	0.00913874	2018-11-16	18:14:00	4450	-4227	0.00201824	6.50072	0.0913874
OU49213@2			1.83234	2297487000	0.0253646	0.00201846	0.0085781	2018-11-16	18:17:00	3532	-4187	0.0020161	5.43723	0.085781
OU49213@3			1.83085	2293902000	0.00811741	0.00201876	0.00949287	2018-11-16	18:20:00	3193	-4533	0.0020164	5.58368	0.0949287
OU49213@4			1.79776	2264627000	0.0207858	0.00201896	0.00797967	2018-11-16	18:44:00	2809	-4289	0.0020166	5.68529	0.0797967
OU49213@5			1.79924	2255124000	0.0394194	0.00201898	0.0101439	2018-11-16	18:47:00	2475	-4090	0.00201663	5.69774	0.101439
OU49213@6			1.80151	2254715000	0.031395	0.00202139	0.0056939	2018-11-16	18:50:00	2531	-4435	0.00201903	6.89622	0.056939
OU49213@7			1.79862	2269795000	0.0266879	0.00201813	0.00887489	2018-11-16	18:53:00	2418	-5754	0.00201577	5.27135	0.0887489
OU49213@8			1.79917	2266087000	0.0294357	0.00201914	0.00827932	2018-11-16	18:56:00	3108	-5830	0.00201678	5.77296	0.0827932
P84557@01			1.79651	2242967000	0.019304	0.0020182	0.00959911	2018-11-16	19:00:00	2757	-556	0.00201585	5.30971	0.0959911
P84557@2			1.79815	2242702000	0.0324288	0.00201807	0.00666589	2018-11-16	19:03:00	2777	-118	0.00201571	5.24296	0.0666589
P84557@3			1.79877	2229219000	0.032375	0.00201816	0.00859902	2018-11-16	19:06:00	2811	636	0.00201581	5.28879	0.0859902
P84557@4			1.80097	2227121000	0.0220793	0.00201841	0.00778396	2018-11-16	19:09:00	2960	829	0.00201605	5.41232	0.0778396
P84557@5			1.7969	2223213000	0.0240686	0.00201804	0.00917029	2018-11-16	19:12:00	2784	1161	0.00201568	5.22652	0.0917029
P84557@6			1.79612	2219966000	0.0163257	0.00201824	0.00728437	2018-11-16	19:15:00	3018	1284	0.00201588	5.32714	0.0728437
P84557@7			1.78892	2205484000	0.0304798	0.00201788	0.0111968	2018-11-16	19:18:00	2959	1567	0.00201552	5.14782	0.111968
P84557@8			1.78665	2202582000	0.0401685	0.00201803	0.00976441	2018-11-16	19:21:00	2754	1844	0.00201567	5.22304	0.0976441
P52239@01			1.77898	2230975000	0.0228596	0.00202602	0.00939506	2018-11-16	19:24:00	4737	-711	0.00202365	9.20153	0.0939506
P52239@2			1.78023	2227110000	0.0233466	0.00202606	0.00835791	2018-11-16	19:27:00	4850	-343	0.00202369	9.22245	0.0835791
P52239@3			1.78289	2225208000	0.031078	0.00202596	0.00617721	2018-11-16	19:30:00	5027	-379	0.00202359	9.17363	0.0617721
P52239@4			1.78289	2221490000	0.0241608	0.0020257	0.00893562	2018-11-16	19:33:00	4551	-289	0.00202334	9.04412	0.0893562
P52239@5			1.77695	2224465000	0.0236406	0.00202584	0.00640201	2018-11-16	19:36:00	4282	-198	0.00202347	9.11037	0.0640201
P52239@6			1.77679	2220282000	0.0186763	0.00202552	0.00777184	2018-11-16	19:39:00	3713	-482	0.00202316	8.95446	0.0777184
P52239@7			1.77351	2199306000	0.0286886	0.00202547	0.00720026	2018-11-16	19:42:00	3863	784	0.00202311	8.92955	0.0720026
2018-11-19
P59811@01			1.79745	2203325000	0.0188638	0.00201626	0.0102391	2018-11-19	08:33:00	1641	1118	0.00201416	4.46998	0.102391
P59811@2			1.78634	2181599000	0.0355666	0.00201603	0.00941135	2018-11-19	08:36:00	1435	1239	0.00201394	4.3564	0.0941135
P59811@3			1.78555	2193946000	0.116166	0.00201614	0.0113304	2018-11-19	08:39:00	1417	1525	0.00201405	4.4112	0.113304
P59811@4			1.77656	2166390000	0.0266697	0.0020164	0.00846082	2018-11-19	08:42:00	1780	1544	0.0020143	4.53923	0.0846082
P59811@5			1.76912	2159815000	0.0341537	0.00201628	0.00791785	2018-11-19	08:45:00	1685	1886	0.00201419	4.48194	0.0791786
P59811@6			1.76427	2186010000	0.0619206	0.00201627	0.00748495	2018-11-19	08:48:00	1410	2234	0.00201418	4.47845	0.0748495
P59811@7			1.75285	2150983000	0.023365	0.00201664	0.00765689	2018-11-19	08:52:00	1413	274	0.00201455	4.66178	0.0765689
P59811@8			1.74526	2135953000	0.026489	0.00201687	0.00956482	2018-11-19	08:55:00	1834	963	0.00201477	4.77487	0.0956482
P59972@01			1.74049	2120281000	0.0420058	0.0020153	0.0101106	2018-11-19	08:59:00	-265	202	0.00201321	3.99272	0.101106
P59972@2			1.73447	2122877000	0.0354166	0.00201518	0.010366	2018-11-19	09:02:00	364	-305	0.00201309	3.93443	0.10366
P59972@3			1.72954	2105402000	0.0326102	0.00201517	0.00719156	2018-11-19	09:05:00	62	682	0.00201308	3.92895	0.0719156
P59972@4			1.72688	2095674000	0.0315842	0.00201457	0.00668113	2018-11-19	09:08:00	2	962	0.00201248	3.63104	0.0668113
P59972@5			1.72179	2093074000	0.0318582	0.00201556	0.00749051	2018-11-19	09:11:00	469	1396	0.00201346	4.12175	0.0749051
P59972@6			1.71898	2097592000	0.0889662	0.00201483	0.00992721	2018-11-19	09:14:00	285	1466	0.00201274	3.76106	0.0992721
P59972@7			1.7146	2077686000	0.0290482	0.00201519	0.0103084	2018-11-19	09:17:00	-199	1516	0.0020131	3.93941	0.103084
P59972@8			1.7067	2109899000	0.086509	0.00201485	0.00903292	2018-11-19	09:20:00	380	2226	0.00201276	3.76903	0.0903292
P60678@01			1.69488	2060578000	0.0431658	0.00201952	0.00749339	2018-11-19	09:25:00	-1739	1451	0.00201743	6.09706	0.0749339
P60678@2			1.69222	2048415000	0.0463522	0.00201886	0.0110911	2018-11-19	09:28:00	-1979	1549	0.00201676	5.76576	0.110911
P60678@3			1.688	2038523000	0.0444754	0.00201886	0.00927007	2018-11-19	09:31:00	-2206	1279	0.00201676	5.76626	0.0927007
P60678@4			1.68463	2049654000	0.202801	0.00201906	0.00726218	2018-11-19	09:34:00	-2260	843	0.00201696	5.8639	0.0726218
P60678@5			1.86378	2317016000	0.052212	0.00201836	0.00669818	2018-11-19	10:33:00	-2614	-406	0.00201599	5.38064	0.0669818
P60678@6			1.86183	2265694000	0.0546916	0.00201901	0.00808185	2018-11-19	10:36:00	-2575	262	0.00201664	5.70591	0.0808185
P60678@7			1.86136	2300185000	0.117332	0.00201867	0.00729764	2018-11-19	10:39:00	-2751	338	0.0020163	5.53555	0.0729764
P60678@8			1.86058	2246585000	0.0362705	0.00201883	0.00787873	2018-11-19	10:42:00	-2970	250	0.00201645	5.61226	0.0787873
P60678@9			1.85549	2245560000	0.0564637	0.00201893	0.0073853	2018-11-19	10:45:00	-2692	1347	0.00201655	5.66257	0.073853
P60678@10			1.85401	2276813000	0.079066	0.00201984	0.00715801	2018-11-19	10:48:00	-2527	1057	0.00201747	6.11785	0.0715801
P60678@11			1.84814	2245747000	0.0477036	0.00201856	0.00549785	2018-11-19	10:51:00	-1762	622	0.00201619	5.47877	0.0549785
P60678@12			1.84822	2274610000	0.164672	0.00201897	0.00805618	2018-11-19	10:54:00	-1500	702	0.0020166	5.68399	0.0805618
P59923@01			1.84251	2250517000	0.0381868	0.0020168	0.00736536	2018-11-19	10:58:00	-3157	-1861	0.00201443	4.60208	0.0736536
P59923@2			1.84039	2240510000	0.0394839	0.00201693	0.0059783	2018-11-19	11:01:00	-3742	-1681	0.00201456	4.66833	0.059783
P59923@3			1.83875	2243080000	0.0403216	0.00201685	0.00770296	2018-11-19	11:04:00	-3514	-1917	0.00201449	4.63047	0.0770296
P59923@4			1.83601	2252178000	0.036414	0.00201722	0.0087772	2018-11-19	11:07:00	-2692	-2370	0.00201485	4.81477	0.087772
P59923@5			1.83406	2252228000	0.032077	0.00201713	0.00828661	2018-11-19	11:10:00	-2978	-2929	0.00201476	4.76596	0.0828661
P59923@6			1.83382	2250567000	0.0371906	0.00201723	0.00993021	2018-11-19	11:13:00	-2666	-2867	0.00201486	4.81527	0.0993021
P59923@7			1.82741	2248460000	0.0312939	0.00201683	0.00848856	2018-11-19	11:17:00	-2571	-3164	0.00201446	4.61652	0.0848856
P59923@8			1.8224	2247478000	0.0351392	0.00201702	0.00885314	2018-11-19	11:20:00	-2650	-3995	0.00201465	4.71067	0.0885314
P59923@9			1.82099	2243099000	0.0295902	0.00201694	0.00718463	2018-11-19	11:23:00	-3059	-4533	0.00201457	4.67082	0.0718464
P64877@01			1.81888	2244726000	0.0377142	0.0020162	0.0059849	2018-11-19	11:27:00	-1625	-4416	0.00201383	4.3047	0.059849
P64877@2			1.81481	2243899000	0.0381476	0.00201879	0.00864051	2018-11-19	11:30:00	-1950	-3696	0.00201642	5.59433	0.0864051
P64877@3			1.81841	2235679000	0.0359268	0.00202119	0.00660468	2018-11-19	11:33:00	-1757	-3664	0.00201881	6.78931	0.0660468
P64877@4			1.79791	2206243000	0.0472394	0.00201831	0.00974967	2018-11-19	11:56:00	-1660	-2402	0.00201594	5.35772	0.0974967
P64877@5			1.79619	2205607000	0.0313268	0.00201884	0.00942555	2018-11-19	11:59:00	-1764	-2571	0.00201647	5.62073	0.0942555
P64877@6			1.79259	2212881000	0.0710676	0.00201848	0.00886818	2018-11-19	12:03:00	-1719	-2899	0.00201611	5.43941	0.0886818
P64877@7			1.79377	2209012000	0.0350961	0.00201906	0.00876263	2018-11-19	12:05:00	-1656	-3129	0.00201669	5.73131	0.0876263
P64877@8			1.79252	2208636000	0.045169	0.00201846	0.00760546	2018-11-19	12:19:00	589	-4388	0.00201609	5.43244	0.0760546
P64877@9			1.79072	2206850000	0.0323985	0.002022	0.00785864	2018-11-19	12:22:00	588	-3419	0.00201962	7.19329	0.0785864
P89630@01			1.78391	2232282000	0.0332542	0.00202087	0.00586223	2018-11-19	12:15:00	-51	-5766	0.0020185	6.63141	0.0586223
P89630@2			1.78227	2224892000	0.0318757	0.00202098	0.0088526	2018-11-19	12:19:00	589	-4388	0.0020186	6.68421	0.088526
P89630@3			1.78281	2215430000	0.0336683	0.00202073	0.00810778	2018-11-19	12:22:00	588	-3419	0.00201835	6.56018	0.0810778
P89630@4			1.78109	2213013000	0.0326664	0.00202087	0.00850095	2018-11-19	12:25:00	224	-3362	0.0020185	6.63091	0.0850095
P89630@5			1.78031	2209474000	0.0384642	0.00202061	0.00672292	2018-11-19	12:28:00	418	-3081	0.00201823	6.5004	0.0672292
P89630@6			1.78172	2202360000	0.0400076	0.00202061	0.00963648	2018-11-19	12:31:00	238	-2818	0.00201824	6.5014	0.0963648
P89630@7			1.77906	2200868000	0.0350163	0.00202062	0.00777831	2018-11-19	12:34:00	-102	-2841	0.00201825	6.50688	0.0777831
P89630@8			1.77538	2203679000	0.0300016	0.00202079	0.00628435	2018-11-19	12:37:00	-40	-3760	0.00201842	6.59305	0.0628435
P89634@01			1.77139	2218244000	0.0281864	0.00202075	0.00820213	2018-11-19	12:40:00	2345	-3748	0.00201837	6.57014	0.0820213
P89634@2			1.76959	2212416000	0.0320402	0.00202124	0.00782939	2018-11-19	12:44:00	2222	-3387	0.00201886	6.81272	0.078294
P89634@3			1.7678	2213935000	0.0306572	0.00202075	0.00699942	2018-11-19	12:47:00	2382	-4206	0.00201838	6.57313	0.0699942
P89634@4			1.76787	2210434000	0.0391111	0.00202076	0.00859797	2018-11-19	12:50:00	2599	-4385	0.00201839	6.57562	0.0859797
P89634@5			1.76529	2209742000	0.0407234	0.00202104	0.00845406	2018-11-19	12:53:00	2823	-4544	0.00201867	6.71659	0.0845406
P89634@6			1.76404	2205152000	0.0332016	0.00202055	0.0098809	2018-11-19	12:56:00	1544	-5245	0.00201818	6.47251	0.098809
P89634@7			1.76271	2216765000	0.035973	0.0020211	0.00626381	2018-11-19	12:59:00	2085	-5949	0.00201873	6.74647	0.0626381
P89634@8			1.76208	2202512000	0.0293399	0.00202092	0.0101957	2018-11-19	13:02:00	2243	-4822	0.00201855	6.65831	0.101957
OU49136@01			1.88272	2355460000	0.0333612	0.00201789	0.00625116	2018-11-19	14:00:00	4301	852	0.00201533	5.06904	0.0625116	0.017961
OU49136@2			1.88045	2339334000	0.0326832	0.00201777	0.00849414	2018-11-19	14:03:00	4794	368	0.00201521	5.0053	0.0849414	0.014984
OU49136@3			1.87943	2328174000	0.0335429	0.00201778	0.00904448	2018-11-19	14:06:00	4252	399	0.00201522	5.01029	0.0904448	0.0120071
OU49136@4			1.87396	2328386000	0.0389557	0.00201714	0.00863342	2018-11-19	14:09:00	4459	-186	0.00201458	4.68855	0.0863342	0.0090301
OU49136@5			1.87575	2303421000	0.985559	0.00201753	0.00803833	2018-11-19	14:12:00	4196	-148	0.00201497	4.87783	0.0803833	0.00605315
OU49136@6			1.86308	2331159000	0.0430327	0.0020179	0.0082168	2018-11-19	14:15:00	4831	-906	0.00201534	5.05964	0.082168	0.00307619
OU49136@7			1.86629	2327224000	0.0287301	0.00201789	0.0107157	2018-11-19	14:18:00	4104	-1249	0.00201533	5.05168	0.107157	9.92319e-05
OU49136@8			1.86824	2322482000	0.0404463	0.0020171	0.0069434	2018-11-19	14:21:00	3995	-1108	0.00201454	4.65274	0.069434	-0.00287773
P31272@01			1.86034	2308333000	0.0367806	0.00202354	0.00690523	2018-11-19	14:25:00	3332	1422	0.00202097	7.85933	0.0690523	-0.006847
P31272@2			1.86167	2290251000	0.042512	0.00202323	0.00903836	2018-11-19	14:28:00	3183	1308	0.00202066	7.70145	0.0903836	-0.00982396
P31272@3			1.86253	2294747000	0.0463223	0.0020231	0.00793169	2018-11-19	14:31:00	3055	1560	0.00202053	7.63472	0.0793169	-0.0128009
P31272@4			1.86245	2294680000	0.0481699	0.002026	0.00746451	2018-11-19	14:34:00	2994	1716	0.00202343	9.07615	0.0746451	-0.0157779
P31272@5			1.8605	2290919000	0.045292	0.00202365	0.00520089	2018-11-19	14:37:00	3336	1624	0.00202108	7.90221	0.0520089	-0.0187548
P31272@6			1.85541	2339215000	0.0454693	0.00202185	0.00851462	2018-11-19	14:41:00	3277	473	0.00201928	7.00072	0.0851462	-0.0227241
OU50109@01			1.85385	2334682000	0.0320175	0.00202332	0.0070149	2018-11-19	14:46:00	4582	-2946	0.00202075	7.72842	0.070149	-0.0276857
OU50109@2			1.85283	2334746000	0.0339468	0.0020233	0.00815465	2018-11-19	14:49:00	4356	-3668	0.00202074	7.71747	0.0815465	-0.0306627
OU50109@3			1.85698	2343003000	0.0316892	0.00202321	0.0112023	2018-11-19	14:52:00	4273	-3899	0.00202064	7.66867	0.112023	-0.0336396
OU50109@4			1.85487	2336830000	0.0453844	0.00202324	0.00610798	2018-11-19	14:55:00	4691	-4069	0.00202067	7.68014	0.0610798	-0.0366166
OU50109@5			1.85127	2329524000	0.0346775	0.00202365	0.00866218	2018-11-19	14:58:00	4331	-4456	0.00202108	7.88087	0.0866218	-0.0395935
OU50109@6			1.85189	2327844000	0.0321772	0.00202345	0.00966592	2018-11-19	15:01:00	4208	-4637	0.00202088	7.77529	0.0966592	-0.0425705
OU50109@7			1.84571	2332768000	0.0529963	0.0020237	0.00791186	2018-11-19	15:04:00	4026	-4995	0.00202113	7.89882	0.0791186	-0.0455474
OU50109@8			1.84454	2321605000	0.0394508	0.00202312	0.0080936	2018-11-19	15:07:00	4355	-5193	0.00202055	7.60597	0.080936	-0.0485244
2018-11-20
P68812@5			1.70153	2174283000	0.0179342	0.00202291	0.0087451	2018-11-20	08:37:00	1401	-6647	0.00202018	7.47299	0.087451
P68812@6			1.69183	2137253000	0.0199866	0.00202222	0.00890569	2018-11-20	08:40:00	1801	-6294	0.0020195	7.12984	0.0890569
P68812@7			1.68409	2114691000	0.0226032	0.00202304	0.00591064	2018-11-20	08:43:00	1870	-6195	0.00202031	7.53723	0.0591064
P68812@8			1.6747	2120906000	0.0414419	0.00202152	0.0101505	2018-11-20	08:46:00	1517	-6245	0.0020188	6.78072	0.101505
P68812@9			1.66594	2101244000	0.0320151	0.0020216	0.00767	2018-11-20	08:49:00	1415	-6110	0.00201888	6.82256	0.0767
P68812@10			1.65436	2081217000	0.0306169	0.00202257	0.0101206	2018-11-20	08:52:00	1872	-5993	0.00201984	7.30316	0.101206
P44932@01			1.64294	2061096000	0.0185462	0.00202293	0.00808796	2018-11-20	08:56:00	2854	-3766	0.0020202	7.48145	0.0808796
P44932@2			1.63433	2046285000	0.0239166	0.00202659	0.00867003	2018-11-20	08:59:00	2919	-3565	0.00202386	9.30724	0.0867003
P44932@3			1.62792	2027246000	0.0109832	0.0020234	0.00870219	2018-11-20	09:02:00	2800	-4082	0.00202068	7.71902	0.0870219
P44932@4			1.62205	2030327000	0.0267433	0.0020265	0.00961501	2018-11-20	09:05:00	2870	-4231	0.00202377	9.26092	0.0961501
P44932@5			1.84853	2329621000	0.0254185	0.00202612	0.00682814	2018-11-20	10:00:00	3128	-4274	0.00202337	9.06321	0.0682814
P44932@6			1.8418	2317467000	0.0313045	0.00202565	0.00998095	2018-11-20	10:04:00	3684	-4157	0.0020229	8.82913	0.0998095
P44932@7			1.83719	2318755000	0.0333377	0.00202717	0.00704403	2018-11-20	10:07:00	3033	-4884	0.00202443	9.58763	0.0704403
P44932@8			1.83249	2309699000	0.0338027	0.00202799	0.00861567	2018-11-20	10:10:00	3644	-5151	0.00202524	9.99203	0.0861567
P44932@9			1.83281	2311468000	0.0259919	0.00202815	0.00646792	2018-11-20	10:13:00	3481	-5541	0.0020254	10.0732	0.0646792
P44932@10			1.82553	2302945000	0.028636	0.00202801	0.0084346	2018-11-20	10:16:00	3021	-5672	0.00202526	10.005	0.084346
P44932@11			1.81818	2282473000	0.0317234	0.00202484	0.00887654	2018-11-20	10:19:00	3274	-3810	0.0020221	8.42623	0.0887654
P44932@12			1.81638	2277090000	0.0308377	0.00202408	0.00752589	2018-11-20	10:22:00	3592	-3620	0.00202133	8.04574	0.0752589
OU60751@01			1.8066	2249856000	0.0372891	0.00202225	0.00777921	2018-11-20	10:26:00	2950	-544	0.00201951	7.13534	0.0777921
OU60751@2			1.80433	2250872000	0.0445014	0.00202169	0.00934033	2018-11-20	10:29:00	2748	-156	0.00201895	6.85545	0.0934033
OU60751@3			1.80128	2238768000	0.0257169	0.00202113	0.00934459	2018-11-20	10:32:00	2763	47	0.00201839	6.57606	0.0934459
OU60751@4			1.79635	2236454000	0.0327287	0.00202135	0.00643109	2018-11-20	10:35:00	3794	152	0.0020186	6.68463	0.0643109
OU60751@5			1.79353	2233800000	0.0323364	0.00202267	0.00934037	2018-11-20	10:38:00	4473	26	0.00201993	7.34651	0.0934037
OU60751@6			1.78868	2215046000	0.0308279	0.0020219	0.00772235	2018-11-20	10:42:00	4396	-345	0.00201916	6.96253	0.0772235
OU60751@7			1.77405	2218297000	0.0413385	0.00202207	0.00654614	2018-11-20	10:45:00	4106	-297	0.00201932	7.04371	0.0654614
OU60751@8			1.77421	2211855000	0.0360144	0.00202122	0.0102509	2018-11-20	10:48:00	3653	138	0.00201848	6.62138	0.102509
OU60751@9			1.7746	2203609000	0.0501122	0.00202215	0.00823501	2018-11-20	10:52:00	3305	1063	0.00201941	7.08554	0.0823501
OU60751@10			1.77554	2193694000	0.0396866	0.00202211	0.0074683	2018-11-20	10:55:00	2923	1059	0.00201937	7.06562	0.074683
OU60751@11			1.77092	2196273000	0.0306166	0.00202154	0.00580818	2018-11-20	10:58:00	3052	700	0.0020188	6.78224	0.0580818
OU60751@12			1.76748	2193673000	0.0385449	0.00202133	0.00598422	2018-11-20	11:01:00	3335	481	0.00201858	6.67417	0.0598422
15NZ67@01			1.87779	2331403000	0.0301163	0.00201846	0.00720864	2018-11-20	12:09:00	1128	1258	0.00201551	5.14004	0.0720864
15NZ67@2			1.87419	2324821000	0.0319407	0.0020185	0.00813929	2018-11-20	12:12:00	1419	1145	0.00201554	5.15846	0.0813929
15NZ67@3			1.8727	2327283000	0.0276395	0.00201828	0.00930907	2018-11-20	12:15:00	997	661	0.00201532	5.04841	0.0930907
15NZ67@4			1.86801	2330005000	0.0404417	0.00201856	0.00720646	2018-11-20	12:19:00	1550	388	0.0020156	5.18784	0.0720646
15NZ67@5			1.86785	2341884000	0.0448551	0.00201846	0.00968733	2018-11-20	12:22:00	1588	-313	0.00201551	5.14153	0.0968733
15NZ67@6			1.86707	2338511000	0.0351846	0.0020189	0.00589824	2018-11-20	12:25:00	2095	-603	0.00201594	5.35666	0.0589824
15NZ67@7			1.86089	2307252000	0.04016	0.00201873	0.00860527	2018-11-20	12:29:00	1402	1736	0.00201578	5.27449	0.0860527
15NZ67@8			1.85901	2311297000	0.0307898	0.00201805	0.006708	2018-11-20	12:32:00	1722	1637	0.00201509	4.93388	0.06708
18MS505A@01			1.85518	2281838000	0.0365087	0.00201669	0.00747825	2018-11-20	12:35:00	616	2670	0.00201374	4.25813	0.0747825
18MS505A@2			1.85385	2277549000	0.0385089	0.00201706	0.0065725	2018-11-20	12:38:00	-134	2426	0.00201411	4.44188	0.065725
18MS505A@3			1.85377	2279913000	0.0359406	0.00201699	0.00735043	2018-11-20	12:41:00	219	1992	0.00201404	4.40652	0.0735043
18MS505A@4			1.84994	2271172000	0.0401005	0.00201707	0.00763777	2018-11-20	12:45:00	-478	2012	0.00201412	4.44636	0.0763777
18MS505A@5			1.84759	2278487000	0.0383524	0.0020173	0.00842243	2018-11-20	12:48:00	-332	1504	0.00201435	4.56239	0.0842243
18MS505A@6			1.84556	2297148000	0.0516406	0.00201712	0.00713027	2018-11-20	12:51:00	184	204	0.00201417	4.47126	0.0713027
18MS505A@7			1.84743	2296363000	0.0364345	0.00201735	0.00821376	2018-11-20	12:54:00	-31	-137	0.0020144	4.58579	0.0821376
18MS505A@8			1.84407	2291448000	0.0285832	0.00201702	0.00729191	2018-11-20	12:57:00	-654	-372	0.00201407	4.42246	0.0729191
18WA570@01			1.84118	2242189000	0.0318957	0.00201499	0.00735598	2018-11-20	13:01:00	-1650	2569	0.00201205	3.41406	0.0735598
18WA570@2			1.8382	2245478000	0.0296995	0.00201507	0.00673507	2018-11-20	13:04:00	-1962	1750	0.00201212	3.4529	0.0673507
18WA570@3			1.83468	2245696000	0.0305985	0.00201521	0.00559351	2018-11-20	13:07:00	-2094	1294	0.00201227	3.52411	0.0559351
18WA570@4			1.83312	2246024000	0.0376394	0.00201487	0.00981206	2018-11-20	13:10:00	-1445	1439	0.00201193	3.35381	0.0981206
18WA570@5			1.83022	2239683000	0.0362416	0.00201486	0.00764411	2018-11-20	13:13:00	-2861	192	0.00201191	3.34534	0.0764411
18WA570@6			1.83226	2237893000	0.0465563	0.00201438	0.0067577	2018-11-20	13:16:00	-2873	574	0.00201143	3.10781	0.067577
18WA554A@01			1.81411	2240398000	0.0318775	0.00201524	0.00713719	2018-11-20	13:37:00	3406	490	0.0020123	3.53856	0.0713719
18WA554A@2			1.81466	2235300000	0.0303536	0.00201476	0.00702457	2018-11-20	13:41:00	-2517	-1313	0.00201182	3.29903	0.0702457
18WA554A@3			1.81395	2236203000	0.0260241	0.00201526	0.0102559	2018-11-20	13:47:00	-3391	-1792	0.00201231	3.54603	0.102558
18WA554A@4			1.81348	2235940000	0.0317995	0.002015	0.00866533	2018-11-20	13:50:00	-3444	-2115	0.00201205	3.41506	0.0866533
18WA554A@5			1.81145	2237125000	0.0312811	0.00201487	0.00854647	2018-11-20	13:53:00	-2833	-2071	0.00201192	3.35182	0.0854647
18WA554A@6			1.80801	2231020000	0.0254143	0.00201514	0.00864668	2018-11-20	13:56:00	-3575	-2770	0.00201219	3.48726	0.0864668
18WA554A@7			1.80832	2233204000	0.0277305	0.00201498	0.00886167	2018-11-20	13:59:00	-3249	-3068	0.00201203	3.40809	0.0886167
18WA554A@8			1.80245	2237204000	0.0215553	0.00201506	0.00796757	2018-11-20	14:02:00	-2930	-3405	0.00201211	3.44494	0.0796757
18MS03A@01			1.8012	2272044000	0.0372219	0.00201673	0.00648072	2018-11-20	14:06:00	-466	-4064	0.00201378	4.27705	0.0648072
18MS03A@2			1.79877	2273658000	0.0258352	0.00201688	0.00878852	2018-11-20	14:09:00	-516	-4608	0.00201393	4.35523	0.0878852
18MS03A@3			1.79666	2260056000	0.0323713	0.00201645	0.00780558	2018-11-20	14:12:00	-1313	-4770	0.0020135	4.1416	0.0780558
18MS03A@4			1.79525	2253352000	0.0295799	0.00201633	0.00823743	2018-11-20	14:15:00	-1872	-4481	0.00201338	4.07936	0.0823743
18MS03A@5			1.79674	2251592000	0.0232408	0.00201645	0.00854652	2018-11-20	14:18:00	-1523	-3755	0.0020135	4.1416	0.0854652
18MS03A@6			1.79197	2249391000	0.027883	0.00201637	0.0100334	2018-11-20	14:22:00	-631	-2738	0.00201342	4.10176	0.100334
18WA573@01			1.78837	2295354000	0.038354	0.00201854	0.00860812	2018-11-20	14:25:00	3648	-5004	0.00201559	5.18037	0.0860812
18WA573@2			1.78978	2285625000	0.038888	0.00201716	0.00818821	2018-11-20	14:28:00	3699	-4434	0.00201421	4.49317	0.0818821
18WA573@3			1.78704	2283226000	0.0368863	0.00201815	0.00661534	2018-11-20	14:32:00	3777	-3794	0.00201519	4.98417	0.0661534
18WA573@4			1.78868	2285964000	0.0299382	0.00201827	0.00932339	2018-11-20	14:35:00	4241	-3800	0.00201532	5.04692	0.0932339
18WA573@5			1.78735	2278026000	0.0326466	0.0020188	0.00913292	2018-11-20	14:38:00	4116	-3002	0.00201585	5.30935	0.0913292
18WA573@6			1.78727	2281884000	0.0343369	0.00201833	0.00780725	2018-11-20	14:41:00	4617	-3049	0.00201538	5.07729	0.0780725
18WA573@7			1.78399	2266869000	0.0266224	0.00201815	0.00822509	2018-11-20	14:44:00	3147	-3548	0.0020152	4.98567	0.0822509
P69018@01			1.88	2390000000	0.0329	0.00202	0.00744	2018-11-20	16:22:00	4792	-1066	0.00201724	5.95623	0.0744
P69018@2			1.87927	2391312000	0.0282445	0.0020197	0.00570213	2018-11-20	16:26:00	5681	-1373	0.00201694	5.80434	0.0570213
P69018@3			1.87583	2381160000	0.0379103	0.00202357	0.0100521	2018-11-20	16:29:00	6344	-1152	0.00202081	7.73608	0.100521
P69018@4			1.87614	2380969000	0.0242015	0.00202126	0.00709957	2018-11-20	16:33:00	6887	-1490	0.0020185	6.58471	0.0709957
P69018@5			1.8702	2386672000	0.0355231	0.00201894	0.00919341	2018-11-20	16:36:00	7020	-1055	0.00201618	5.42786	0.0919341
P69018@6			1.8738	2380243000	0.0531548	0.00202224	0.00646389	2018-11-20	16:39:00	7378	-940	0.00201948	7.07275	0.064639
P69018@7			1.87176	2377992000	0.0320742	0.00202165	0.0100935	2018-11-20	16:42:00	7155	-910	0.00201889	6.77693	0.100935
P69018@8			1.86715	2364049000	0.0300872	0.0020318	0.00836205	2018-11-20	16:46:00	4426	-1099	0.00202902	11.8311	0.0836205
P65032@01			1.86684	2381839000	0.0322831	0.0020222	0.00646427	2018-11-20	16:51:00	6834	-286	0.00201944	7.04984	0.0646427
P65032@2			1.8673	2380128000	0.02231	0.0020226	0.01066	2018-11-20	16:54:00	6768	-585	0.00201984	7.25053	0.1066
P65032@3			1.86684	2365356000	0.02422	0.00202148	0.00625088	2018-11-20	16:57:00	6497	43	0.00201872	6.69128	0.0625088
P65032@4			1.8461	2350644000	0.0189566	0.00202886	0.00774075	2018-11-20	17:00:00	6268	-302	0.00202609	10.3665	0.0774075
P65032@5			1.84	2339924000	0.0297902	0.00202174	0.0074658	2018-11-20	17:04:00	5742	46	0.00201898	6.82126	0.074658
P65032@6			1.83844	2334327000	0.0268338	0.00202216	0.00758911	2018-11-20	17:07:00	5392	382	0.0020194	7.03191	0.0758911
P65032@7			1.83562	2311355000	0.0320675	0.00202956	0.00840068	2018-11-20	17:10:00	3734	1222	0.00202679	10.7171	0.0840068
P65032@8			1.83296	2315796000	0.0491126	0.00203082	0.00850882	2018-11-20	17:13:00	3576	876	0.00202804	11.3421	0.0850882
P65032@9			1.83343	2305487000	0.0397162	0.00202183	0.00727642	2018-11-20	17:16:00	3438	947	0.00201907	6.86707	0.0727642
P65032@10			1.8321	2306216000	0.0405726	0.00202214	0.00945651	2018-11-20	17:19:00	3207	1027	0.00201939	7.02444	0.0945651
P77863@01			1.8152	2296910000	0.02996	0.00202095	0.00881056	2018-11-20	17:43:00	1512	1801	0.0020182	6.43132	0.0881056
P77863@2			1.81481	2291059000	0.0384714	0.00201985	0.00827897	2018-11-20	17:46:00	1099	1678	0.00201709	5.88104	0.0827897
P77863@3			1.81348	2291815000	0.0365837	0.00202061	0.00819872	2018-11-20	17:50:00	490	1760	0.00201785	6.25951	0.0819872
P77863@4			1.81395	2284184000	0.0395987	0.00202047	0.00832528	2018-11-20	17:54:00	1871	1690	0.00201771	6.1883	0.0832528
P77863@5			1.81536	2283284000	0.0330963	0.00202032	0.00816182	2018-11-20	17:57:00	1670	1576	0.00201756	6.11509	0.0816182
P77863@6			1.80918	2271514000	0.0373774	0.00202059	0.0100918	2018-11-20	18:00:00	-57	1542	0.00201783	6.25105	0.100917
P77665@01			1.81067	2287628000	0.0332105	0.00199873	0.00837897	2018-11-20	18:04:00	-309	-1279	0.001996	-4.63818	0.0837897
P77665@2			1.8084	2288016000	0.024729	0.00200978	0.00786361	2018-11-20	18:07:00	227	-1822	0.00200703	0.865199	0.0786361
P77665@3			1.80761	2285848000	0.038091	0.00201104	0.0052227	2018-11-20	18:10:00	595	-1475	0.00200829	1.49218	0.052227
P77665@4			1.80957	2278695000	0.0129547	0.00200732	0.00933056	2018-11-20	18:13:00	-125	-1832	0.00200458	-0.359379	0.0933056
P77665@5			1.80308	2287044000	0.0326807	0.00199796	0.00714751	2018-11-20	18:17:00	-1263	-1833	0.00199524	-5.01865	0.0714751
P77665@6			1.80308	2276139000	0.035777	0.00201159	0.00675842	2018-11-20	18:20:00	-1508	-1644	0.00200885	1.76956	0.0675842
P77665@7			1.80073	2268695000	0.0326219	0.00200585	0.00705565	2018-11-20	18:23:00	-1861	-1113	0.00200311	-1.09193	0.0705565
P77665@8			1.8001	2277205000	0.0336501	0.00200762	0.00712315	2018-11-20	18:26:00	-2194	-1411	0.00200488	-0.209979	0.0712315
P77665@9			1.7958	2269166000	0.0264599	0.00199818	0.00636793	2018-11-20	18:30:00	-3468	-1414	0.00199545	-4.91208	0.0636793
P77665@10			1.79901	2269256000	0.025044	0.00200931	0.00780717	2018-11-20	18:33:00	-3804	-1287	0.00200657	0.63114	0.0780717
2018-11-21
HKO5@01			1.89602	2322329000	0.0419753	0.00201509	0.00878939	2018-11-21	10:53:00	2300	3496	0.00201189	3.33469	0.0878939
HKO5@2			1.89641	2320292000	0.0313888	0.00201533	0.00857941	2018-11-21	10:56:00	2374	3343	0.00201212	3.4522	0.0857941
HKO5@3			1.89117	2319019000	0.0317848	0.00201504	0.00662841	2018-11-21	10:59:00	2597	3334	0.00201184	3.31029	0.0662841
HKO5@4			1.89062	2318935000	0.0418865	0.00201529	0.00761005	2018-11-21	11:02:00	2826	3353	0.00201208	3.43128	0.0761005
HKO5@5			1.89336	2312487000	0.0288606	0.00201509	0.00818277	2018-11-21	11:05:00	2903	3306	0.00201188	3.33369	0.0818278
HKO5@6			1.88804	2312531000	0.0465998	0.00201515	0.00539976	2018-11-21	11:08:00	3028	3496	0.00201195	3.36456	0.0539976
HKO5@7			1.88858	2315604000	0.0552332	0.00201498	0.00922212	2018-11-21	11:11:00	3386	3368	0.00201177	3.27793	0.0922212
HKO5@8			1.88757	2311905000	0.0444367	0.00201518	0.00583725	2018-11-21	11:14:00	3582	3386	0.00201198	3.379	0.0583725
HKO5@9			1.88201	2304172000	0.0443038	0.00201541	0.0088679	2018-11-21	11:17:00	4084	3528	0.0020122	3.49302	0.088679
HKO5@10			1.88178	2301590000	0.0480961	0.00201536	0.00698476	2018-11-21	11:20:00	4253	3404	0.00201216	3.46863	0.0698476
MW4@01			1.87505	2297796000	0.0367093	0.00201558	0.0081997	2018-11-21	11:24:00	372	2536	0.00201237	3.57667	0.081997
MW4@2			1.87489	2291514000	0.0314217	0.00201501	0.00690482	2018-11-21	11:26:00	264	2467	0.00201181	3.29436	0.0690482
MW4@3			1.87239	2283845000	0.027485	0.00201518	0.00676997	2018-11-21	11:29:00	57	2456	0.00201197	3.3785	0.0676997
MW4@4			1.86801	2280120000	0.0338012	0.00201545	0.00854101	2018-11-21	11:32:00	-66	2626	0.00201225	3.51344	0.0854101
MW4@5			1.86637	2276705000	0.030924	0.00201513	0.00900893	2018-11-21	11:35:00	-56	2512	0.00201193	3.35461	0.0900893
MW4@6			1.85643	2257935000	0.0288221	0.0020156	0.00622973	2018-11-21	11:38:00	-707	2515	0.0020124	3.58912	0.0622972
MW4@7			1.85526	2267893000	0.0342898	0.00201511	0.00833573	2018-11-21	11:41:00	-1110	2462	0.0020119	3.34216	0.0833573
MW4@8			1.85494	2245495000	0.0449942	0.00201548	0.00769237	2018-11-21	11:44:00	-2622	2578	0.00201227	3.52688	0.0769237
MW4@9			1.8544	2242674000	0.0348463	0.00201489	0.00912439	2018-11-21	11:47:00	-2904	2518	0.00201168	3.23162	0.0912439
MW4@10			1.84908	2231858000	0.0476715	0.00201513	0.00798985	2018-11-21	11:50:00	-3189	2484	0.00201193	3.35461	0.0798985
MW4@11			1.84712	2242868000	0.0376566	0.00201526	0.0085692	2018-11-21	11:53:00	-1969	2639	0.00201206	3.42033	0.085692
HKO14@01			1.89688	2350055000	0.0323553	0.00202936	0.00854161	2018-11-21	12:40:00	2776	471	0.00202623	10.4099	0.0854161	-0.0774588
HKO14@2			1.89805	2354262000	0.040105	0.00202154	0.00747941	2018-11-21	12:43:00	2769	620	0.00201842	6.51715	0.0747941	-0.0748787
HKO14@3			1.90079	2357259000	0.0493587	0.00202069	0.00638151	2018-11-21	12:46:00	2576	586	0.00201757	6.09848	0.0638151	-0.0722985
HKO14@4			1.9029	2354145000	0.0516244	0.00202109	0.00862776	2018-11-21	12:49:00	2135	636	0.00201798	6.30172	0.0862776	-0.0697184
HKO14@5			1.90767	2356417000	0.0331215	0.00202062	0.0075025	2018-11-21	12:52:00	1994	653	0.00201751	6.07027	0.075025	-0.0671382
HKO14@6			1.90243	2345072000	0.0376206	0.00202074	0.00709144	2018-11-21	12:55:00	1537	711	0.00201763	6.13211	0.0709144	-0.0645581
HKO14@7			1.89523	2350063000	0.0612245	0.00201968	0.00660524	2018-11-21	12:58:00	1041	581	0.00201656	5.60489	0.0660524	-0.0619779
RNZ285@01			1.89563	2363558000	0.0502527	0.00202252	0.00693664	2018-11-21	13:02:00	4124	-102	0.0020194	7.02445	0.0693664	-0.0585377
RNZ285@2			1.89375	2389574000	0.190264	0.00202659	0.00870341	2018-11-21	13:05:00	1982	-214	0.00202346	9.05163	0.0870341	-0.0559575
RNZ285@3			1.89922	2362254000	0.0461937	0.00202133	0.00571344	2018-11-21	13:08:00	1836	-66	0.00201821	6.43558	0.0571344	-0.0533774
RNZ285@4			1.89602	2357006000	0.0478859	0.00202748	0.00788881	2018-11-21	13:11:00	1699	-218	0.00202435	9.50145	0.0788881	-0.0507972
RNZ285@5			1.89563	2355379000	0.0555412	0.00202771	0.00754343	2018-11-21	13:14:00	1543	-6	0.00202458	9.61656	0.0754343	-0.0482171
RNZ285@6			1.89641	2354012000	0.0429917	0.00202892	0.00734787	2018-11-21	13:17:00	1390	-254	0.00202579	10.2246	0.0734787	-0.0456369
RNZ285@7			1.89617	2343237000	0.0321339	0.00202539	0.0100458	2018-11-21	13:20:00	1363	-128	0.00202227	8.46751	0.100458	-0.0430568
RNZ285@8			1.89234	2346324000	0.0309041	0.00202238	0.00827058	2018-11-21	13:23:00	740	-236	0.00201926	6.97031	0.0827058	-0.0404766
RNZ285@9			1.88827	2343341000	0.0581589	0.00202281	0.00726358	2018-11-21	13:26:00	-404	-70	0.00201969	7.19049	0.0726358	-0.0378965
RNZ285@10			1.88522	2355034000	0.0480154	0.00202758	0.0109438	2018-11-21	13:29:00	2763	-66	0.00202446	9.56722	0.109438	-0.0353163
RJM-RJ8G@01			1.88647	2351455000	0.0518388	0.00201834	0.00748079	2018-11-21	13:33:00	-38	-1057	0.00201523	4.96925	0.0748079	-0.0318761
RJM-RJ8G@2			1.88663	2346622000	0.0352374	0.0020186	0.00815528	2018-11-21	13:36:00	-260	-1195	0.00201548	5.0998	0.0815528	-0.029296
RJM-RJ8G@3			1.88835	2337793000	0.0343106	0.00201805	0.00745591	2018-11-21	13:39:00	-410	-1025	0.00201493	4.82802	0.0745591	-0.0267158
RJM-RJ8G@4			1.88545	2329694000	0.0365014	0.0020184	0.00878643	2018-11-21	13:42:00	-578	-1045	0.00201528	5.00388	0.0878643	-0.0241357
RJM-RJ8G@5			1.88217	2328560000	0.0451572	0.0020184	0.00776699	2018-11-21	13:45:00	-1446	-1325	0.00201529	5.00995	0.07767	-0.0215555
RJM-RJ8G@7			1.86762	2309895000	0.0279854	0.00201807	0.00968128	2018-11-21	14:03:00	1536	-6082	0.00201496	4.86061	0.0968128	-0.0060746
RJM-RJ8G@6			1.88358	2335036000	0.0427987	0.00201803	0.0108744	2018-11-21	14:07:00	-2305	-912	0.00201492	4.84463	0.108744	-0.0026344
RJM-RJ8G@8			1.86418	2310122000	0.03673	0.00201826	0.00894378	2018-11-21	14:10:00	-2454	-1066	0.00201515	4.96074	0.0894378	-5.4246e-05
RJM-RJ8G@9			1.86332	2297405000	0.0294504	0.00201801	0.00938937	2018-11-21	14:13:00	-3338	-912	0.0020149	4.83983	0.0938937	0.00252591
HKO16@01			1.84673	2333522000	0.0412529	0.00202357	0.00667683	2018-11-21	14:18:00	3678	-2178	0.00202045	7.61265	0.0667683	0.00682616
HKO16@2			1.84822	2321782000	0.0437138	0.00202314	0.00839879	2018-11-21	14:21:00	3563	-2157	0.00202002	7.39813	0.0839879	0.00940631
HKO16@3			1.84462	2330708000	0.0257018	0.00202248	0.00928183	2018-11-21	14:24:00	3285	-2326	0.00201936	7.07406	0.0928183	0.0119865
HKO16@4			1.84274	2312877000	0.0310771	0.00202353	0.00650158	2018-11-21	14:27:00	3190	-2447	0.00202041	7.59798	0.0650158	0.0145666
HKO16@5			1.83805	2309453000	0.0298969	0.0020233	0.00518025	2018-11-21	14:30:00	2842	-2052	0.00202018	7.48852	0.0518026	0.0171468
HKO16@6			1.83343	2306746000	0.028864	0.00202318	0.00673946	2018-11-21	14:33:00	2565	-2205	0.00202006	7.42986	0.0673946	0.0197269
HKO16@7			1.82881	2298471000	0.0273196	0.00202313	0.00849772	2018-11-21	14:36:00	2422	-2105	0.00202001	7.40953	0.0849772	0.0223071
HKO16@8			1.82764	2301772000	0.0279213	0.00202357	0.00587218	2018-11-21	14:39:00	2361	-2217	0.00202045	7.62872	0.0587218	0.0248872
HKO16@9			1.82686	2291277000	0.0279691	0.00202271	0.00704416	2018-11-21	14:42:00	2196	-2152	0.00201959	7.20506	0.0704416	0.0274674
HKO16@10			1.82115	2283091000	0.0422157	0.00202297	0.00521049	2018-11-21	14:45:00	2181	-2050	0.00201985	7.33561	0.0521049	0.0300475
RNZ261@01			1.80558	2272223000	0.0373523	0.00202656	0.00870263	2018-11-21	14:48:00	4739	-3464	0.00202343	9.12428	0.0870262	0.0326277
RNZ261@2			1.80409	2273648000	0.0521101	0.00202726	0.00521578	2018-11-21	14:51:00	4603	-3321	0.00202414	9.4784	0.0521578	0.0352078
RNZ261@3			1.80738	2306081000	0.0562388	0.002031	0.00687644	2018-11-21	14:54:00	4449	-3380	0.00202786	11.3403	0.0687644	0.037788
RNZ261@4			1.82084	2322929000	0.0393056	0.00202529	0.00918005	2018-11-21	14:58:00	4052	-3493	0.00202217	8.50349	0.0918005	0.0412282
RNZ261@5			1.81919	2293149000	0.0410188	0.00202649	0.00729558	2018-11-21	15:01:00	3692	-3578	0.00202336	9.10061	0.0729558	0.0438083
RNZ261@6			1.82029	2285255000	0.0189276	0.00202787	0.00829163	2018-11-21	15:03:00	3609	-3472	0.00202474	9.79246	0.0829163	0.0455284
RNZ261@7			1.80511	2272690000	0.0395988	0.00202785	0.00650463	2018-11-21	15:06:00	3480	-3494	0.00202472	9.78409	0.0650464	0.0481086
RNZ261@8			1.80104	2272275000	0.0297193	0.00202621	0.00614565	2018-11-21	15:10:00	3422	-3286	0.00202309	8.97092	0.0614565	0.0515488
RNZ261@9			1.78383	2255288000	0.0362803	0.00202631	0.00822807	2018-11-21	15:28:00	2538	-3564	0.00202318	9.0337	0.0822807	0.0670297
RNZ261@10			1.78321	2242592000	0.0281916	0.00202595	0.00746072	2018-11-21	15:31:00	2284	-3570	0.00202283	8.86101	0.0746072	0.0696099
RNZ261@11			1.7789	2237514000	0.0382124	0.00202653	0.00644481	2018-11-21	15:34:00	2032	-3568	0.00202341	9.15239	0.0644481	0.07219
RNZ296@01			1.7775	2254016000	0.0377324	0.00202198	0.00816981	2018-11-21	15:38:00	2656	-5212	0.00201886	6.88575	0.0816981	0.0756302
RNZ296@2			1.78039	2259122000	0.0757048	0.00202241	0.00667763	2018-11-21	15:41:00	2708	-5398	0.00201929	7.10344	0.0667763	0.0782104
RNZ296@3			1.7987	2294177000	0.0537514	0.00202152	0.00843962	2018-11-21	15:44:00	2761	-5523	0.0020184	6.66435	0.0843962	0.0807905
RNZ296@4			1.8181	2296408000	0.0415262	0.00202173	0.00779976	2018-11-21	15:47:00	2260	-5255	0.00201861	6.7715	0.0779976	0.0833707
RNZ296@5			1.82318	2304048000	0.0373334	0.00202161	0.00819707	2018-11-21	15:50:00	1375	-5146	0.00201849	6.71233	0.0819707	0.0859508
RNZ296@6			1.79987	2269381000	0.0417864	0.00202144	0.0067315	2018-11-21	15:53:00	1189	-5555	0.00201832	6.63325	0.067315	0.088531
RNZ296@7			1.82811	2313563000	0.0329583	0.00202267	0.0060502	2018-11-21	15:56:00	1105	-5315	0.00201955	7.2463	0.060502	0.0911111
RNZ296@8			1.82514	2260240000	0.053817	0.00202143	0.00871403	2018-11-21	15:59:00	304	-5409	0.00201832	6.63443	0.0871403	0.0936913
RNZ296@9			1.81153	2286518000	0.0461162	0.00202177	0.00671451	2018-11-21	16:02:00	-19	-5100	0.00201865	6.80481	0.0671451	0.0962714
KP3@01			1.81325	2292724000	0.0765343	0.00201569	0.00622024	2018-11-21	16:05:00	-848	-5421	0.00201258	3.78045	0.0622024	0.0988516
KP3@2			1.81497	2273011000	0.0315632	0.00201593	0.00628924	2018-11-21	16:09:00	-1850	-4497	0.00201282	3.90439	0.0628924	0.102292
KP3@3			1.81309	2275182000	0.0683026	0.00201631	0.0095235	2018-11-21	16:12:00	-2004	-4624	0.0020132	4.09469	0.095235	0.104872
KP3@4			1.81333	2301345000	0.154805	0.00201493	0.0078753	2018-11-21	16:15:00	-2039	-4449	0.00201182	3.41112	0.078753	0.107452
KP3@5			1.81067	2234233000	0.0828951	0.0020149	0.00634755	2018-11-21	16:18:00	-2962	-3410	0.00201179	3.39727	0.0634755	0.110032
GL5@01			1.80597	2259908000	0.0361175	0.00199752	0.00959787	2018-11-21	16:23:00	3460	1318	0.00199443	-5.25451	0.0959787	0.114333
GL5@2			1.80808	2258072000	0.0369559	0.0019916	0.0100582	2018-11-21	16:25:00	3289	1308	0.00198853	-8.19708	0.100582	0.116053
GL5@3			1.81419	2255475000	0.0412291	0.0019909	0.00741195	2018-11-21	16:28:00	3137	1700	0.00198783	-8.54604	0.0741195	0.118633
GL5@4			1.8127	2249009000	0.0357356	0.00199636	0.00938885	2018-11-21	16:31:00	2756	1714	0.00199328	-5.82574	0.0938885	0.121213
GL5@5			1.81137	2256802000	0.0423391	0.0019951	0.00810174	2018-11-21	16:34:00	2589	1612	0.00199202	-6.45005	0.0810174	0.123793
GL5@6			1.80339	2237805000	0.04087	0.00199906	0.0109931	2018-11-21	16:37:00	2638	1358	0.00199598	-4.47217	0.109931	0.126373
GL5@7			1.80167	2246078000	0.046473	0.00199375	0.00807562	2018-11-21	16:40:00	2902	1379	0.00199067	-7.11661	0.0807562	0.128953
GL5@8			1.80542	2244872000	0.0485272	0.00199644	0.00958476	2018-11-21	16:43:00	2323	1677	0.00199336	-5.7716	0.0958476	0.131534
15NZ10@01			1.85471	2354385000	0.0238257	0.0020191	0.00993945	2018-11-21	08:48:00	5649	-3972	0.00201618	5.45299	0.0993945	-0.0227834
15NZ10@2			1.8472	2353656000	0.0424646	0.0020189	0.00831461	2018-11-21	08:51:00	5018	-3733	0.00201597	5.354	0.0831461	-0.019186
15NZ10@3			1.84634	2335540000	0.0324964	0.00201809	0.00891625	2018-11-21	08:54:00	4043	-3986	0.00201517	4.95722	0.0891625	-0.0155886
15NZ10@4			1.84243	2337665000	0.0384543	0.00201882	0.00715236	2018-11-21	08:57:00	3474	-3876	0.00201589	5.32086	0.0715236	-0.0119913
15NZ10@5			1.84164	2334016000	0.0269313	0.00201815	0.00794931	2018-11-21	09:00:00	2987	-3878	0.00201523	4.99131	0.0794931	-0.00839388
15NZ10@6			1.83194	2322193000	0.0306245	0.00201804	0.00713005	2018-11-21	09:04:00	1874	-3979	0.00201512	4.94431	0.0713005	-0.00359738
15NZ10@7			1.82889	2325920000	0.0232192	0.00201758	0.00750254	2018-11-21	09:07:00	912	-3788	0.00201466	4.71983	0.0750254	4.44089e-16
15NZ10@8			1.82616	2301543000	0.0286097	0.0020191	0.00519455	2018-11-21	09:10:00	1106	-3916	0.00201618	5.47937	0.0519455	0.00359738
15NZ10@9			1.82217	2289441000	0.0262522	0.00201902	0.0078059	2018-11-21	09:13:00	-406	-3926	0.0020161	5.44213	0.078059	0.00719475
15NZ10@10			1.81685	2273304000	0.0296562	0.0020187	0.010467	2018-11-21	09:16:00	-1981	-3784	0.00201578	5.28587	0.10467	0.0107921
15NZ10@11			1.80879	2272424000	0.0347776	0.00201888	0.00946363	2018-11-21	09:20:00	-2226	-3830	0.00201596	5.3823	0.0946363	0.0155886
15NZ69@01			1.80957	2270284000	0.0591394	0.00202005	0.00661291	2018-11-21	09:24:00	4067	-48	0.00201713	5.96874	0.0661291	0.0203851
15NZ69@2			1.80707	2294924000	0.0303689	0.00202041	0.00932339	2018-11-21	09:27:00	3640	-134	0.00201749	6.15211	0.0932339	0.0239825
15NZ69@3			1.80355	2255191000	0.03392	0.00202052	0.0065885	2018-11-21	09:30:00	3519	-483	0.00201759	6.2075	0.065885	0.0275799
15NZ69@4			1.79979	2269289000	0.0383591	0.00202001	0.00908754	2018-11-21	09:33:00	2510	-413	0.00201708	5.95662	0.0908754	0.0311773
15NZ69@5			1.79846	2261291000	0.0364087	0.00202007	0.00936457	2018-11-21	09:36:00	2124	-466	0.00201714	5.9906	0.0936457	0.0347746
15NZ69@6			1.79815	2257636000	0.0362033	0.00202075	0.0079916	2018-11-21	09:39:00	1926	-344	0.00201783	6.33531	0.079916	0.038372
15NZ69@7			1.79627	2249988000	0.0340982	0.00201939	0.00939389	2018-11-21	09:42:00	1585	-115	0.00201647	5.66116	0.0939389	0.0419694
15NZ60@01			1.7861	2263474000	0.0386495	0.00201836	0.00752631	2018-11-21	09:46:00	2461	536	0.00201544	5.15353	0.0752631	0.0467659
15NZ60@2			1.78571	2252474000	0.0376915	0.00201873	0.00642551	2018-11-21	09:49:00	2885	459	0.00201581	5.34288	0.0642551	0.0503633
15NZ60@3			1.78399	2247809000	0.0260287	0.00201842	0.00606864	2018-11-21	09:52:00	3806	494	0.0020155	5.18961	0.0606864	0.0539606
15NZ60@4			1.7807	2236215000	0.0387861	0.00201863	0.00928926	2018-11-21	09:55:00	5024	448	0.00201571	5.30077	0.0928926	0.057558
15NZ60@5			1.77679	2218897000	0.0432977	0.00201872	0.0079336	2018-11-21	09:58:00	5629	443	0.0020158	5.3452	0.079336	0.0611554
2018-08-29
BP76172@1			1.87568	2399687000	0.0224965	0.00201577	0.00973341	2018-08-29	15:21:00	143	-554	0.00201269	3.73693	0.0973341
BP76172@02			1.86973	2407927000	0.0231185	0.0020155	0.00556918	2018-08-29	15:24:00	205	-574	0.00201243	3.60448	0.0556918
BP76172@03			1.87278	2402600000	0.057516	0.0020157	0.00743131	2018-08-29	15:27:00	127	-75	0.00201263	3.70357	0.0743131
BP76172@04			1.87826	2401380000	0.0413956	0.00201576	0.00650495	2018-08-29	15:30:00	114	35	0.00201269	3.73295	0.0650495
BP76172@05			1.88561	2386832000	0.0123429	0.00201593	0.00847318	2018-08-29	15:33:00	-440	240	0.00201285	3.8166	0.0847318
BP76172@06			1.8684	2381849000	0.0191354	0.00201574	0.00738911	2018-08-29	15:35:00	-434	293	0.00201267	3.72448	0.0738911
BP76172@07			1.87059	2395047000	0.0369012	0.00201585	0.00509686	2018-08-29	15:38:00	-498	-24	0.00201278	3.77826	0.0509686
BP76172@08			1.88279	2386579000	0.0292215	0.00201527	0.00961979	2018-08-29	15:41:00	-492	-93	0.0020122	3.49095	0.0961979
BP76172@09			1.86253	2376789000	0.0208995	0.00201605	0.00998261	2018-08-29	15:44:00	-607	552	0.00201297	3.87685	0.0998261
BP76172@10			1.85698	2380959000	0.0867762	0.00201558	0.00999114	2018-08-29	15:47:00	-630	550	0.0020125	3.64282	0.0999114
BP76172@11			1.87513	2399598000	0.022365	0.00201536	0.00727461	2018-08-29	15:50:00	-653	543	0.00201229	3.53576	0.0727461
BP76172@12			1.88952	2424535000	0.0243419	0.00201554	0.00720843	2018-08-29	15:52:00	6	96	0.00201247	3.6239	0.0720843
BP76172@13			1.89469	2400280000	0.0402029	0.00201619	0.00722155	2018-08-29	15:55:00	-13	45	0.00201311	3.94657	0.0722155
BP76172@14			1.87474	2386483000	0.0464143	0.00201548	0.00840664	2018-08-29	15:58:00	-206	1378	0.0020124	3.59253	0.0840664
BP76172@15			1.87216	2383971000	0.0266016	0.00201531	0.00615299	2018-08-29	16:01:00	-227	1368	0.00201224	3.51186	0.0615299
BP76172@16			1.86253	2365362000	0.0283203	0.00201552	0.0108809	2018-08-29	16:04:00	-250	1356	0.00201245	3.61444	0.108809
BP76172@17			1.86222	2340710000	0.0168458	0.00201638	0.00805465	2018-08-29	16:07:00	0	1753	0.00201331	4.04466	0.0805465
BP76172@18			1.84024	2326874000	0.092662	0.00201504	0.00723214	2018-08-29	16:10:00	-6	1808	0.00201197	3.37543	0.0723214
													max. 1se:	0.125683
													mean 1se:	0.0804911

## Sheet: S2. Lu-Hf-U-Pb - unknowns
Sample	spot age	± 2 se	178Hf/177Hf	± 2 se	180Hf/177Hf	± 2 se	176Hf/177Hf	± 2 se	176Lu/177Hf	± 2 se	ɛHf(T1)	± 2 se	T DM (2)
P84150
RT_P84150 - 1	531.2	7.4	1.46713	0.00019	1.88682	0.00012	0.282783	2.4e-05	0.00243	0.00013	10.9282	0.849708	718.531
RT_P84150 - 2	309	15	1.46727	0.00012	1.88687	9.4e-05	0.282908	2.4e-05	0.00146	0.00012	10.9329	0.849285	542.285
RT_P84150 - 3	477.6	5.9	1.46725	0.00012	1.88668	0.00013	0.2828	2.5e-05	0.001584	2.9e-05	10.6823	0.885006	691.875
RT_P84150 - 4	475.6	4.4	1.46716	0.00013	1.88685	0.00011	0.282784	3e-05	0.001903	1.3e-05	9.97239	1.062	735.771
RT_P84150 - 5	517.4	6.3	1.46719	0.00015	1.88672	0.00012	0.282808	2.9e-05	0.00187	0.00011	11.7183	1.0267	656.928
RT_P84150 - 6	486.2	6.4	1.46705	0.00011	1.88674	0.0001	0.282768	2.5e-05	0.001888	5.2e-05	9.63512	0.885023	765.757
RT_P84150 - 7	484	8.4	1.46724	0.00013	1.88694	8.9e-05	0.282778	2.9e-05	0.000947	4.8e-05	10.2449	1.02662	724.964
RT_P84150 - 8	429.6	6.8	1.46718	0.00012	1.88688	0.00012	0.282824	3e-05	0.001777	2e-05	10.4514	1.06189	668.666
RT_P84150 - 9	523.2	8	1.46719	0.00013	1.88682	9.8e-05	0.282796	2.7e-05	0.002137	2e-05	11.3236	0.955904	686.84
RT_P84150 - 10	460.7	6.4	1.46707	0.00013	1.88673	0.00011	0.282806	2.9e-05	0.001423	1.9e-05	10.5827	1.02657	684.874
RT_P84150 - 11	501.3	4.9	1.46721	0.00012	1.88681	7.9e-05	0.282752	2.1e-05	0.002411	4.4e-05	9.21434	0.743444	804.641
RT_P84150 - 12	496	7.2	1.46723	0.00015	1.88683	0.00012	0.282775	2.3e-05	0.002047	9.3e-05	10.0381	0.814239	747.713
RT_P84150 - 13	487.3	7.3	1.46716	0.00013	1.88674	0.00011	0.282788	1.8e-05	0.002023	2.5e-05	10.3228	0.637218	722.59
RT_P84150 - 14	500.9	5.8	1.46731	0.00012	1.88693	0.00011	0.282784	2.6e-05	0.00232	0.00013	10.3691	0.920454	730.383
RT_P84150 - 15	470	10	1.46728	0.00011	1.88673	0.00011	0.282785	3.3e-05	0.001888	6.9e-05	9.89399	1.16819	736.358
RT_P84150 - 16	506	12	1.46717	0.00016	1.8868	0.00014	0.282765	2.1e-05	0.001027	1.6e-05	10.2375	0.743452	742.851
RT_P84150 - 17	496.3	6.3	1.46729	0.00012	1.88689	0.00011	0.282771	3.1e-05	0.002027	4.6e-05	9.90938	1.09745	756.192
RT_P84150 - 18	488.6	8.1	1.46727	0.00018	1.88683	0.0001	0.282767	3.1e-05	0.001792	7e-05	9.68168	1.09743	764.676
RT_P84150 - 19	486.5	6.7	1.4673	0.00016	1.88687	0.00014	0.282775	2.9e-05	0.002213	5.1e-05	9.7843	1.02663	756.443
RT_P84150 - 20	493.8	8.1	1.46721	0.00014	1.88697	0.00012	0.28276	3e-05	0.001409	7e-05	9.66989	1.06205	769.547
RT_P84150 - 21	486	5.3	1.46729	0.00015	1.88686	8.8e-05	0.28277	2.9e-05	0.002303	2.7e-05	9.56778	1.02663	769.909
RT_P84150 - 22	493.2	6.5	1.46727	0.00016	1.88683	0.0001	0.282798	2.6e-05	0.001616	2.1e-05	10.9345	0.920438	688.055
RT_P84150 - 23	501.1	6.4	1.46709	0.00019	1.88685	0.00011	0.282777	3.2e-05	0.002409	2.1e-05	10.0959	1.13287	748.046
RT_P84150 - 24	508.3	9.5	1.46722	0.00013	1.88685	0.0001	0.282792	2.8e-05	0.001394	7.2e-05	11.1196	0.991275	688.136
RT_P84150 - 25	466.5	7.2	1.46716	0.00017	1.8869	9.8e-05	0.282798	3e-05	0.001998	4.5e-05	10.246	1.06198	711.039
P89667
RT_P89667 - 1	347.3	4.7	1.4672	0.00015	1.88688	8.2e-05	0.282674	1.9e-05	0.001513	4.9e-05	3.45869	0.672408	1049.59
RT_P89667 - 2	390.2	5.2	1.46727	0.00016	1.8868	0.00011	0.282581	2.3e-05	0.001513	3.5e-05	1.08333	0.814046	1234.32
RT_P89667 - 3	352.6	3.7	1.46738	0.00019	1.88681	7.5e-05	0.282668	2.5e-05	0.00184	0.00024	3.28306	0.884758	1064.95
RT_P89667 - 4	375	11	1.467	0.00013	1.8868	7.7e-05	0.282602	2.5e-05	0.001365	1.9e-05	1.53875	0.884802	1193.4
RT_P89667 - 5	356.3	2.8	1.46717	0.00016	1.88678	9.2e-05	0.282608	2.7e-05	0.00147	2.1e-05	1.32521	0.955547	1192.11
RT_P89667 - 6	351.9	3.1	1.46705	0.00013	1.88679	9.1e-05	0.282588	2.9e-05	0.001099	3.2e-05	0.609905	1.02632	1233.93
RT_P89667 - 7	367.6	3.1	1.46724	0.00015	1.88687	7.6e-05	0.282536	2.7e-05	0.000589	1.2e-05	-0.766695	0.955571	1333.48
RT_P89667 - 8	353.5	3.6	1.46725	0.00015	1.88689	0.0001	0.282745	2.9e-05	0.00753	0.00031	4.69372	1.02632	975.989
RT_P89667 - 9	358.7	4	1.46711	0.00013	1.88679	8.7e-05	0.282728	3e-05	0.001447	8.4e-05	5.62887	1.06172	920.578
RT_P89667 - 10	364	6.7	1.46723	0.00013	1.88678	0.00012	0.282824	2.9e-05	0.000901	1.8e-05	9.27163	1.02635	692.24
RT_P89667 - 11	359.9	3.7	1.46718	0.00013	1.88682	9.4e-05	0.282714	2.8e-05	0.00481	0.00016	4.35666	0.990945	1002.5
RT_P89667 - 12	357.2	6.4	1.46725	0.00012	1.88684	0.00011	0.282507	2.7e-05	0.001951	4.9e-05	-2.34392	0.955549	1424.84
RT_P89667 - 13	372.5	5.8	1.46724	0.00014	1.88669	0.0001	0.282732	2.4e-05	0.001655	3.6e-05	6.01444	0.849406	906.951
RT_P89667 - 14	341.5	4.7	1.46707	0.00016	1.88688	8.6e-05	0.282582	3.3e-05	0.001376	6.7e-05	0.110072	1.16785	1257.32
RT_P89667 - 15	363.3	4.2	1.46716	0.00013	1.88685	0.00012	0.282771	2.6e-05	0.00415	0.00023	6.59807	0.920171	862.453
RT_P89667 - 16	370.9	4.8	1.46712	0.00012	1.88677	0.00012	0.282639	2.4e-05	0.001246	7e-05	2.78956	0.849403	1110.8
RT_P89667 - 17	374.6	5.5	1.46729	0.0001	1.8869	0.00011	0.282574	1.9e-05	0.000754	2.4e-05	0.690957	0.672449	1246.8
RT_P89667 - 18	365.2	5.3	1.46724	9e-05	1.88678	8.8e-05	0.282703	2.1e-05	0.000412	2e-05	5.13381	0.743218	957.256
RT_P89667 - 19	383.2	2.8	1.46727	0.00012	1.88687	9.5e-05	0.282505	2.6e-05	0.00052	1.9e-05	-1.50369	0.920211	1392.42
RT_P89667 - 20	383.1	6	1.46723	9.4e-05	1.8868	0.00011	0.282708	2.5e-05	0.000984	6.1e-05	5.56096	0.884819	944.244
P89321
RT_P89321 - 1	366.9	9.5	1.46721	0.00013	1.88672	8.9e-05	0.282732	2.5e-05	0.0002607	2.9e-06	6.23452	0.884786	888.485
RT_P89321 - 2	363	10	1.46713	0.00013	1.88685	0.00011	0.282704	2.7e-05	0.000452	2.2e-05	5.11098	0.955561	956.965
RT_P89321 - 3	357	11	1.46712	0.00014	1.8868	9.4e-05	0.282707	2.9e-05	0.0003764	4.3e-06	5.10267	1.02633	952.737
RT_P89321 - 4	332.3	8	1.46725	0.00012	1.88692	9e-05	0.282719	2.1e-05	0.0002441	2.3e-06	5.0105	0.743163	939.022
RT_P89321 - 5	357.1	6.2	1.46721	0.00013	1.88702	0.00015	0.28266	3.1e-05	0.001111	1.6e-05	3.26761	1.09711	1069.5
RT_P89321 - 6	352.2	9.8	1.46724	0.00014	1.88683	0.00013	0.282714	2.8e-05	0.000606	1.2e-05	5.19067	0.990928	943.33
RT_P89321 - 7	363.3	7.4	1.4672	0.00015	1.88665	0.00013	0.282721	2.8e-05	0.000722	1.2e-05	5.65421	0.990953	922.61
RT_P89321 - 8	359.5	8.5	1.46719	0.00015	1.88681	0.00011	0.282726	3.4e-05	0.000811	2.5e-05	5.72679	1.20329	914.975
RT_P89321 - 9	355.7	8.5	1.4672	9.6e-05	1.88685	0.0001	0.282725	3.1e-05	0.000723	2.3e-05	5.62923	1.09711	918.177
RT_P89321 - 10	281	13	1.46724	0.00011	1.88675	0.00011	0.282714	2.7e-05	0.000458	1.1e-05	3.65625	0.955386	984.46
RT_P89321 - 11	358.5	6.8	1.46711	0.00012	1.88676	0.00012	0.282744	3.1e-05	0.000953	2.5e-05	6.30825	1.09711	877.127
RT_P89321 - 12	144	16	1.46727	0.00012	1.88676	0.00014	0.282742	3.5e-05	0.000208	2.2e-05	1.65884	1.23809	1002.48
RT_P89321 - 13	361.1	6.4	1.46725	0.00013	1.88683	0.00012	0.282703	2.6e-05	0.000996	2.1e-05	4.90343	0.920166	968.669
RT_P89321 - 14	363.4	7.3	1.4672	0.00015	1.88686	0.00012	0.282701	2.8e-05	0.0007515	7.1e-06	4.94147	0.990953	968.072
RT_P89321 - 15	362.5	8.8	1.4672	0.00017	1.88683	8e-05	0.282727	2.6e-05	0.0006804	3.4e-06	5.85905	0.920169	908.927
RT_P89321 - 16	361	10	1.4672	0.00015	1.88691	8.8e-05	0.282721	2.5e-05	0.0003101	9.9e-06	5.70246	0.884775	917.714
RT_P89321 - 17	348.5	8.3	1.46725	0.00015	1.88687	0.00013	0.282688	2.7e-05	0.000571	1.9e-05	4.19738	0.95553	1003.6
RT_P89321 - 18	349.5	7.3	1.46717	0.00012	1.88691	0.00014	0.282694	3.1e-05	0.000979	1.3e-05	4.33717	1.09709	995.498
RT_P89321 - 19	274	18	1.46714	0.00016	1.88685	0.00011	0.282759	3.3e-05	0.000208	1.1e-05	5.13979	1.16768	884.561
RT_P89321 - 20	353.8	9.6	1.4672	0.00015	1.88687	0.00011	0.282687	3.2e-05	0.0002683	2.8e-06	4.34947	1.13249	998.126
P84143
RT_P84143 - 1	238.1	8.2	1.46714	0.00014	1.88693	9.7e-05	0.282794	2.3e-05	0.00149	1.4e-05	5.37998	0.81377	840.796
RT_P84143 - 2	416	16	1.46726	0.00015	1.88684	0.00013	0.282789	3.2e-05	0.001168	1.9e-05	9.09204	1.13265	744.921
RT_P84143 - 3	449	18	1.46723	0.00015	1.88682	0.00012	0.282785	3.3e-05	0.001583	6.7e-05	9.5405	1.16813	742.36
RT_P84143 - 4	315	11	1.46695	0.00013	1.88682	0.00014	0.28283	3.2e-05	0.00219	0.00013	8.14858	1.1324	725.206
RT_P84143 - 5	384	11	1.46731	0.00017	1.88684	0.00014	0.282797	3.2e-05	0.001674	3.3e-05	8.55476	1.13257	753.928
RT_P84143 - 6	397	11	1.46713	0.00012	1.88684	0.00012	0.282756	3.1e-05	0.001314	1.5e-05	7.47492	1.09721	833.21
RT_P84143 - 7	417	11	1.46706	0.00016	1.88677	0.0001	0.282794	3.2e-05	0.00278	0.00013	8.84469	1.13265	761.533
RT_P84143 - 8	474	12	1.46707	0.00014	1.88689	0.00015	0.282784	3e-05	0.001478	1.5e-05	10.0723	1.062	728.107
RT_P84143 - 9	460	11	1.46722	0.00017	1.88697	0.00012	0.282785	2.5e-05	0.001275	3.8e-05	9.86952	0.884971	730.007
RT_P84143 - 10	466	15	1.46724	0.00015	1.8869	0.00011	0.282816	3.1e-05	0.001688	2.8e-05	10.9686	1.09738	664.337
RT_P84143 - 11	389	13	1.46726	0.00018	1.88678	0.00014	0.28276	3.2e-05	0.001959	7.7e-05	7.27802	1.13258	839.439
RT_P84143 - 12	315.6	8.6	1.46708	0.00017	1.88684	0.00014	0.282847	4.1e-05	0.001669	3.9e-05	8.87165	1.45088	679.469
RT_P84143 - 13	330.4	9.8	1.46721	0.00017	1.88689	0.00011	0.282807	3e-05	0.001498	4.1e-05	7.80797	1.06166	759.167
RT_P84143 - 14	385.7	9.2	1.46721	0.00012	1.88681	0.00011	0.282759	3.3e-05	0.002631	3.3e-05	7.00119	1.16797	854.491
RT_P84143 - 15	457	12	1.46704	0.00013	1.88671	9.8e-05	0.282761	3.2e-05	0.001646	2.1e-05	8.84271	1.13276	793.338
RT_P84143 - 16	435	14	1.46717	0.00014	1.88688	8.4e-05	0.282787	3.1e-05	0.0014054	9.6e-06	9.36358	1.0973	742.596
RT_P84143 - 17	383.4	6.2	1.46716	0.00012	1.88679	0.0001	0.282814	2.8e-05	0.002507	4.8e-05	8.93188	0.990997	729.341
RT_P84143 - 18	467.9	9.7	1.46728	0.00014	1.88679	0.00011	0.282788	2.5e-05	0.00211	0.0001	9.88679	0.884986	735.156
RT_P84143 - 19	463	7.4	1.46724	0.00011	1.88677	0.00011	0.282785	2.6e-05	0.002438	8.1e-05	9.57681	0.920376	751.121
RT_P84143 - 20	417	8.8	1.46719	0.00016	1.88694	0.00012	0.282799	2.3e-05	0.001712	2.4e-05	9.31712	0.814095	731.313
RT_P84143 - 21	434	12	1.46725	0.00013	1.88691	0.00014	0.282757	2.7e-05	0.00249	0.00013	7.96787	0.955713	831.04
RT_P84143 - 22	130.3	3.6	1.46718	0.00015	1.88683	0.00014	0.282942	2.7e-05	0.001054	2.8e-05	8.35757	0.955065	565.381
P74756
RT_P74756 - 1	346	5.5	1.46728	0.00014	1.88681	0.00011	0.282528	2.5e-05	0.001725	2.3e-05	-1.78459	0.884745	1380.65
RT_P74756 - 2	1088	15	1.46715	0.00013	1.88689	9.6e-05	0.282217	2.2e-05	0.001188	5.1e-05	3.44266	0.779878	1636.67
RT_P74756 - 3	348.9	3.2	1.46716	0.00011	1.88688	0.00014	0.282574	2.3e-05	0.001933	4.9e-05	-0.143295	0.813971	1279.22
RT_P74756 - 4	344.1	7	1.4672	0.00013	1.88689	9e-05	0.282558	2.5e-05	0.0007622	2.9e-06	-0.543567	0.884741	1300.73
RT_P74756 - 5	772	12	1.4671	0.00011	1.88676	0.0001	0.282369	2.6e-05	0.001077	1.3e-05	1.98926	0.921015	1479.28
RT_P74756 - 6	354.6	7.5	1.46718	9.8e-05	1.88682	0.00011	0.282291	3e-05	0.001145	1.7e-05	-9.85351	1.06171	1894.54
RT_P74756 - 7	2643	37	1.46703	0.00013	1.88683	0.00012	0.280951	2.3e-05	0.000776	2.3e-05	-6.17886	0.818257	3468.59
RT_P74756 - 8	361.8	5.9	1.46725	0.00012	1.88677	0.00011	0.282563	2.8e-05	0.0007569	1.3e-06	0.0212251	0.99095	1279.04
RT_P74756 - 9	337.3	5.5	1.46717	0.00014	1.88684	0.00012	0.282544	3.1e-05	0.00083	0.00013	-1.20264	1.09706	1336.99
RT_P74756 - 10	391	18	1.46722	0.00013	1.88685	0.00014	0.281816	7.2e-05	0.000943	2.6e-05	-25.8277	2.54832	2913.4
RT_P74756 - 11	352.3	6.9	1.4671	0.00011	1.88679	8.7e-05	0.282426	2.5e-05	0.000854	3.3e-05	-5.05746	0.884758	1591.9
RT_P74756 - 12	1316	26	1.46724	0.00011	1.88678	8.6e-05	0.28218	3e-05	0.001268	3.7e-05	7.06608	1.06402	1585.48
RT_P74756 - 13	355.7	7.3	1.46711	0.00016	1.88682	8.7e-05	0.282458	3.2e-05	0.001333	5.1e-05	-3.9639	1.1325	1525.77
RT_P74756 - 14	337.4	4.6	1.46719	0.00017	1.88692	0.00012	0.28253	3.9e-05	0.00399	0.00071	-2.40258	1.38018	1412.83
RT_P74756 - 15	330	7.3	1.46715	0.00012	1.88668	0.00011	0.28255	2.4e-05	0.0007581	6.8e-06	-1.13361	0.849325	1326.83
RT_P74756 - 16	2123	16	1.46727	0.00018	1.88688	9.5e-05	0.28125	2.2e-05	0.000451	2e-05	-6.91853	0.781732	3107.37
P51290
RT_P51290 - 1	364.8	8	1.46709	0.00014	1.88683	0.0001	0.282602	2.5e-05	0.001154	2.4e-05	1.37099	0.884782	1195.95
RT_P51290 - 2	371.6	6.7	1.46717	0.00013	1.88688	0.00013	0.282566	3.4e-05	0.00069	1.5e-05	0.358021	1.20332	1265.5
RT_P51290 - 3	366.2	7	1.46716	0.00015	1.88686	0.0001	0.282564	2.8e-05	0.0008151	2.1e-06	0.138623	0.990959	1275.1
RT_P51290 - 4	369.8	5.2	1.46706	0.00014	1.88685	0.00014	0.282649	3e-05	0.00219	0.00013	2.88832	1.06175	1103.66
RT_P51290 - 5	398.6	5	1.46712	9.1e-05	1.88677	9.5e-05	0.282571	2.5e-05	0.001465	8.6e-05	0.921527	0.884849	1251.23
RT_P51290 - 6	378.4	4.5	1.46709	0.00015	1.88678	0.00011	0.282564	2.8e-05	0.001477	3.3e-05	0.238678	0.990986	1278.45
RT_P51290 - 7	170	5.6	1.46702	0.00014	1.8868	0.00011	0.282359	3.5e-05	0.00545	0.00035	-11.9044	1.23816	1875.92
RT_P51290 - 8	367.8	3.5	1.46714	0.00011	1.88682	9.6e-05	0.282576	2e-05	0.001271	1.4e-05	0.487043	0.707831	1254.32
RT_P51290 - 9	384.2	8	1.46724	0.00013	1.88671	9.2e-05	0.28246	2.5e-05	0.00125	1.9e-05	-3.26034	0.884821	1504.06
RT_P51290 - 10	371.8	4.7	1.46726	0.00012	1.88689	0.00011	0.28243	3e-05	0.00095	3.2e-05	-4.51499	1.06176	1573.24
RT_P51290 - 11	419.1	5.7	1.46709	0.00011	1.88678	0.00014	0.282505	2.6e-05	0.001342	2.8e-05	-0.941667	0.920285	1385.39
RT_P51290 - 12	475.3	7	1.46718	0.00013	1.88678	0.00011	0.282446	2.1e-05	0.0005773	6.9e-06	-1.58088	0.743401	1470.34
RT_P51290 - 13	374.4	4.8	1.46708	0.00012	1.88691	9.6e-05	0.282569	2.6e-05	0.001909	3.5e-05	0.222886	0.920193	1276.27
RT_P51290 - 14	374.6	3.9	1.46715	0.00015	1.88681	0.0001	0.282535	2.6e-05	0.001981	4e-05	-0.99411	0.920194	1353.4
RT_P51290 - 15	398.3	7.3	1.46718	0.00016	1.88683	0.0001	0.28255	3.2e-05	0.001094	6.4e-05	0.269847	1.13261	1292.26
RT_P51290 - 16	363.6	3.9	1.46717	0.00013	1.88671	9.1e-05	0.282545	2.7e-05	0.001433	1.5e-05	-0.739474	0.955562	1328.58
RT_P51290 - 17	389.4	4.8	1.46707	0.00015	1.88699	0.00011	0.282574	1.9e-05	0.001107	4e-05	0.923342	0.672472	1243.82
RT_P51290 - 18	362.7	4.1	1.46717	0.00017	1.88686	0.00011	0.282575	3.6e-05	0.0011359	7.2e-06	0.374445	1.27408	1257.4
RT_P51290 - 19	573.7	6.9	1.46712	0.00015	1.88695	0.00011	0.282375	2.8e-05	0.001465	1.4e-05	-2.26443	0.99142	1591.51
RT_P51290 - 20	362.4	5.4	1.46711	0.00016	1.88695	0.00011	0.282586	3.1e-05	0.001152	3.2e-05	0.753399	1.09712	1233.17
P80531
RT_80531 - 1	367	10	1.46721	0.00016	1.88687	0.00013	0.282612	3.3e-05	0.000498	4.3e-05	1.93202	1.16792	1162.12
RT_80531 - 2	361.6	7.2	1.46732	0.00014	1.88685	0.00013	0.282608	3.2e-05	0.0005687	2.2e-06	1.65457	1.13251	1175.43
RT_80531 - 3	364.1	8.8	1.46716	0.00012	1.88692	0.0001	0.282596	2.6e-05	0.000544	3e-05	1.29078	0.920172	1200.47
RT_80531 - 4	363	10	1.46716	0.00012	1.88669	0.00015	0.282541	3.6e-05	0.0008146	8.8e-06	-0.745048	1.27408	1328.46
RT_80531 - 5	362	8.1	1.46713	0.00011	1.88676	0.00012	0.282606	2.7e-05	0.000582	1.9e-05	1.58939	0.955559	1179.88
RT_80531 - 6	370.2	9.3	1.46718	0.00013	1.88681	0.0001	0.282597	2.3e-05	0.000482	2.5e-05	1.47556	0.81401	1193.6
RT_80531 - 7	363	12	1.4672	0.00017	1.88677	0.00013	0.282548	3.1e-05	0.00122	0.00021	-0.594877	1.09713	1318.96
RT_80531 - 8	369	11	1.46727	0.00015	1.88682	0.00017	0.282582	3.6e-05	0.000716	1.2e-05	0.860993	1.2741	1231.59
RT_80531 - 9	393.6	9.6	1.46724	0.00015	1.88681	0.00012	0.282598	3e-05	0.000627	1.9e-05	1.98894	1.06181	1179.61
RT_80531 - 10	366	11	1.46714	0.00014	1.88682	0.00013	0.282603	3e-05	0.00053	1.2e-05	1.58371	1.06174	1183.42
RT_80531 - 11	365	10	1.46714	0.00013	1.88679	0.00013	0.282631	3.8e-05	0.00071	2.7e-05	2.5091	1.34487	1123.93
RT_80531 - 12	356.2	9.4	1.46722	0.00014	1.88685	0.00014	0.282575	3e-05	0.000953	1.6e-05	0.277263	1.06172	1258.4
RT_80531 - 13	361	7.2	1.46716	0.00016	1.88685	0.00014	0.282517	3.9e-05	0.001193	5.1e-05	-1.72861	1.38025	1389.02
RT_80531 - 14	373	10	1.46717	0.00015	1.88688	0.00014	0.282583	2.9e-05	0.0004063	2.7e-06	1.06051	1.02637	1222.12
RT_80531 - 15	366	13	1.46723	0.00014	1.88691	0.00011	0.282626	2.8e-05	0.000405	1.6e-05	2.42804	0.990959	1129.86
RT_80531 - 16	380	13	1.46722	0.00014	1.88693	0.00014	0.282626	3.1e-05	0.000496	2.3e-05	2.71442	1.09717	1122.79
RT_80531 - 17	371.6	8.1	1.46722	0.00014	1.88685	0.00014	0.282559	3.1e-05	0.001041	2.7e-05	0.0237943	1.09715	1286.65
P71401
RT_P71401 - 1	121.7	3.1	1.46718	0.00014	1.88671	0.0001	0.282675	3.1e-05	0.000652	2.1e-05	-1.23988	1.09654	1168.16
RT_P71401 - 2	123	3.5	1.46723	0.00013	1.88683	0.00012	0.28267	3.1e-05	0.0005663	8.1e-06	-1.38142	1.09654	1178.13
RT_P71401 - 3	123.7	2.9	1.4671	0.00014	1.88675	0.0001	0.282684	3.2e-05	0.0004647	5.3e-06	-0.862598	1.13191	1145.91
RT_P71401 - 4	121.6	3.9	1.46723	0.00014	1.88678	9.3e-05	0.282659	2.6e-05	0.000546	6.2e-06	-1.79949	0.919675	1203.41
RT_P71401 - 5	123	3.3	1.46727	0.00016	1.88686	0.0001	0.282676	2.8e-05	0.000585	7.6e-06	-1.17071	0.990422	1164.82
RT_P71401 - 6	123.4	3.5	1.46722	0.00012	1.887	0.00012	0.282652	3e-05	0.0005435	6.8e-06	-2.00752	1.06117	1217.97
RT_P71401 - 7	131.2	4.2	1.46711	0.00013	1.88684	0.0001	0.282653	3.3e-05	0.0004733	8.7e-06	-1.7954	1.1673	1210.78
RT_P71401 - 8	120.4	3.2	1.46713	0.00016	1.88698	0.0001	0.282669	2.8e-05	0.000849	1.1e-05	-1.49614	0.990416	1183.31
RT_P71401 - 9	119.2	3.2	1.46722	0.00014	1.88676	0.0001	0.282655	2.4e-05	0.0006161	5.1e-06	-1.999	0.848926	1214.09
RT_P71401 - 10	124.5	3.5	1.4672	0.00013	1.88691	0.00011	0.282651	2.8e-05	0.000535	1.6e-05	-2.01813	0.990425	1219.51
RT_P71401 - 11	122.6	2.9	1.46717	0.00015	1.88689	0.0001	0.282667	2.8e-05	0.00085	2.4e-05	-1.51928	0.990421	1186.52
RT_P71401 - 12	120.1	2.7	1.46715	8.9e-05	1.88682	9.8e-05	0.282642	2.6e-05	0.0006209	3.8e-06	-2.43957	0.919672	1242.6
RT_P71401 - 13	134.7	5.2	1.46707	0.00016	1.88677	0.00011	0.28266	3.2e-05	0.0003843	1.7e-06	-1.46312	1.13194	1192.58
RT_P71401 - 14	121.4	3.2	1.46723	0.00011	1.88692	0.00011	0.282652	2.4e-05	0.0006698	4.7e-06	-2.06141	0.84893	1219.78
RT_P71401 - 15	122.5	3.7	1.46719	0.00015	1.88689	0.00011	0.282662	2.3e-05	0.0004574	7.6e-06	-1.66651	0.81356	1195.73
RT_P71401 - 16	122.6	3.1	1.46711	0.00016	1.88692	0.00013	0.28266	2.5e-05	0.00065	5.2e-06	-1.75067	0.884305	1201.12
RT_P71401 - 17	123.2	3.5	1.46722	0.00015	1.88676	0.00011	0.282653	2.7e-05	0.0004679	2.5e-06	-1.97036	0.95505	1215.46
RT_P71401 - 18	128.5	3.4	1.4672	0.00012	1.88683	0.00012	0.282652	2.9e-05	0.000764	9e-05	-1.91468	1.02581	1216.16
RT_P71401 - 19	125.5	2.7	1.46726	0.00014	1.88691	0.00012	0.282665	2.2e-05	0.00082	1.7e-05	-1.52468	0.778193	1189.16
RT_P71401 - 20	142.7	6.4	1.46718	0.00015	1.8869	0.0001	0.282633	3.1e-05	0.000853	1.7e-05	-2.28652	1.09659	1250.9
RT_P71401 - 21	121.3	4.2	1.46728	0.00012	1.88675	8.9e-05	0.282678	3.2e-05	0.0004221	8.3e-06	-1.12405	1.13191	1160.52
RT_P71401 - 22	118.5	3	1.46717	0.00016	1.88688	0.00012	0.282669	2.7e-05	0.000854	1.3e-05	-1.53771	0.95504	1184.42
RT_P71401 - 23	120.2	6.1	1.46707	0.00019	1.88677	0.00014	0.282735	4.3e-05	0.000953	3.2e-05	0.825813	1.521	1036.34
17NZ42
RT_17NZ42 - 1	342.6	4.3	1.46729	0.00018	1.88691	0.00011	0.282699	3.5e-05	0.001735	1.4e-05	4.19269	1.23863	999.215
RT_17NZ42 - 2	337.7	5.2	1.46691	0.0002	1.88687	0.00012	0.282725	2.5e-05	0.001886	6.5e-05	4.97515	0.884729	945.554
RT_17NZ42 - 3	343.9	4.7	1.46727	0.00015	1.88686	0.00012	0.282698	3.2e-05	0.001218	1.7e-05	4.30271	1.13247	993.25
RT_17NZ42 - 4	342.2	5.1	1.46717	0.0002	1.88695	0.00013	0.282709	2.5e-05	0.001269	2.5e-05	4.64381	0.884738	970.206
RT_17NZ42 - 5	336.4	6	1.46714	0.00015	1.88678	8.4e-05	0.282679	3e-05	0.00288	0.00033	3.0982	1.06167	1063.85
RT_17NZ42 - 6	342	4.3	1.46719	0.00014	1.88697	8.7e-05	0.282671	2.7e-05	0.001737	8e-05	3.18862	0.955516	1062.55
RT_17NZ42 - 7	332.3	4.2	1.46717	0.00018	1.88691	0.00013	0.282723	2.7e-05	0.0014825	8.9e-06	4.87931	0.955496	947.371
RT_17NZ42 - 8	351.3	5.8	1.46715	0.00013	1.88683	9.7e-05	0.282709	2.3e-05	0.001337	3.9e-05	4.82373	0.813975	965.972
RT_17NZ42 - 9	339.9	6.3	1.46728	0.00015	1.88698	0.0001	0.282727	2.7e-05	0.001601	4.1e-05	5.15655	0.955512	935.751
RT_17NZ42 - 10	347.8	6.9	1.4672	0.00015	1.88687	0.00012	0.282732	2.5e-05	0.001528	8.4e-05	5.51852	0.884749	918.966
RT_17NZ42 - 11	344.5	6.2	1.46723	0.00017	1.88688	0.00013	0.282714	2.6e-05	0.000993	9.8e-05	4.93325	0.920132	953.611
RT_17NZ42 - 12	348.5	4.4	1.46731	0.00014	1.88685	9.3e-05	0.282696	2.8e-05	0.001421	1.4e-05	4.28414	0.99092	998.078
RT_17NZ42 - 13	338.4	4.3	1.46727	0.00016	1.88683	8e-05	0.282711	2.7e-05	0.001269	3.2e-05	4.63286	0.955509	967.889
RT_17NZ42 - 14	339.4	4.5	1.46718	0.00019	1.88683	0.00014	0.282698	2.9e-05	0.002207	8.5e-05	3.98329	1.02629	1009.99
RT_17NZ42 - 15	339.4	5.6	1.4671	0.00016	1.88689	6.2e-05	0.282698	2.8e-05	0.002807	4.5e-05	3.84831	0.9909	1018.57
RT_17NZ42 - 16	343.2	4.6	1.46717	0.00016	1.88695	0.00013	0.282743	2.9e-05	0.001628	4.8e-05	5.7869	1.0263	898.225
RT_17NZ42 - 17	350.1	5.6	1.46723	0.00014	1.88686	7.9e-05	0.282731	2.8e-05	0.001573	6.2e-05	5.52178	0.990924	920.582
RT_17NZ42 - 18	332.1	8.3	1.46704	0.00016	1.88678	0.00012	0.282729	2.7e-05	0.00225	0.00023	4.91845	0.955495	944.722
RT_17NZ42 - 19	338.9	5	1.46719	0.0002	1.8869	0.00012	0.282715	4.2e-05	0.002044	4.6e-05	4.61108	1.48635	969.671
RT_17NZ42 - 20	349.3	6.2	1.46721	0.00015	1.88687	9.1e-05	0.282727	2.6e-05	0.001179	4.5e-05	5.4544	0.920142	924.239
RT_17NZ42 - 21	332.1	5.7	1.46721	0.00015	1.88684	9.8e-05	0.282706	2.7e-05	0.001203	1.1e-05	4.33495	0.955495	981.843
RT_17NZ42 - 22	340.1	6.1	1.46724	0.00019	1.88693	0.00011	0.282706	3.1e-05	0.002237	1.9e-05	4.27426	1.09707	992.046
RT_17NZ42 - 23	348.5	4.8	1.46737	0.00015	1.88693	0.0001	0.282696	2e-05	0.002527	4.5e-05	4.02864	0.7078	1014.32
RT_17NZ42 - 24	335.1	6.9	1.4672	0.00012	1.88682	0.00012	0.282737	3.1e-05	0.002382	5.5e-05	5.2348	1.09706	926.964
RT_17NZ42 - 25	339.1	6.2	1.46722	0.00016	1.88672	0.00014	0.282702	2.9e-05	0.001226	2.7e-05	4.33907	1.02629	987.132
17NZ44
RT_17NZ44 - 1	355.3	8.8	1.46705	0.0002	1.88696	0.00011	0.282691	2.8e-05	0.001126	7.2e-05	4.32227	0.990935	1001.04
RT_17NZ44 - 2	309.9	6.2	1.46724	0.00012	1.88696	0.00014	0.282738	3.3e-05	0.002437	4.8e-05	4.73571	1.16777	938.747
RT_17NZ44 - 3	348.6	8.8	1.4671	0.00016	1.88681	0.00013	0.282681	3.4e-05	0.00135	0.00013	3.77184	1.20326	1030.73
RT_17NZ44 - 4	321.8	6.5	1.46719	0.00017	1.88697	0.0001	0.282714	3.1e-05	0.001491	4.5e-05	4.33472	1.09702	973.69
RT_17NZ44 - 5	333.7	6.4	1.46724	0.00013	1.88679	0.0001	0.282745	2.6e-05	0.001801	2.9e-05	5.61734	0.92011	901.494
RT_17NZ44 - 6	339.5	7.5	1.46711	0.00017	1.88691	0.00014	0.282731	3.1e-05	0.00234	0.00012	5.1233	1.09707	937.551
RT_17NZ44 - 7	326	5.7	1.46719	0.00015	1.88676	0.00014	0.282717	3.2e-05	0.00284	0.00015	4.23913	1.13242	983.1
RT_17NZ44 - 8	346.3	5.2	1.46721	0.00016	1.8868	0.0001	0.282661	2.9e-05	0.0012509	6.5e-06	3.03744	1.02631	1075.56
RT_17NZ44 - 9	362.9	7.8	1.46717	0.00013	1.88681	0.00013	0.282705	3.1e-05	0.0009516	7.6e-06	5.02396	1.09713	962.425
RT_17NZ44 - 10	314	3.7	1.4672	0.00015	1.88686	0.0001	0.2827	2.6e-05	0.00272	0.00012	3.41707	0.920069	1025.83
RT_17NZ44 - 11	295.4	5.8	1.46723	0.00017	1.88684	9.2e-05	0.282669	3e-05	0.00276	0.0002	1.93051	1.06157	1105.43
RT_17NZ44 - 12	351.4	6	1.46731	0.00014	1.88691	0.00013	0.282659	2.9e-05	0.00193	5e-05	2.91822	1.02632	1087.17
RT_17NZ44 - 13	336.3	7.6	1.46715	0.00018	1.88675	9.5e-05	0.282746	3.8e-05	0.001852	1.8e-05	5.69636	1.34478	898.522
RT_17NZ44 - 14	254.8	4.6	1.46718	0.00015	1.88688	0.00011	0.282697	2.4e-05	0.004105	6e-05	1.86273	0.849182	1077.51
RT_17NZ44 - 15	339	6.5	1.46707	0.00011	1.88682	0.00011	0.282732	3.4e-05	0.002007	6.5e-05	5.22311	1.20323	930.8
RT_17NZ44 - 16	329.5	5.4	1.46728	0.00016	1.88685	0.0001	0.282719	3e-05	0.0026	4.4e-05	4.43391	1.06166	973.488
RT_17NZ44 - 17	319.1	4.8	1.46719	0.00013	1.88695	0.00012	0.282692	3.2e-05	0.001216	2.4e-05	3.5567	1.13241	1021.01
RT_17NZ44 - 18	339.6	6.7	1.46705	0.00019	1.8869	0.00011	0.282707	2.8e-05	0.001503	3.4e-05	4.46444	0.9909	979.555
RT_17NZ44 - 19	360	7.9	1.46717	0.00014	1.88684	0.00011	0.282681	2.1e-05	0.001797	3.5e-05	3.90979	0.743209	1031
RT_17NZ44 - 20	243.1	4.7	1.46707	0.00017	1.88679	0.00013	0.282709	3.2e-05	0.00402	0.00012	2.07192	1.13221	1054.96
17NZ46
RT_17NZ46 - 1	335.1	8.8	1.46712	0.00012	1.8868	0.0001	0.282703	2.9e-05	0.001405	3.3e-05	4.24857	1.02628	989.716
RT_17NZ46 - 2	340.3	7	1.46723	0.00023	1.88694	0.00013	0.282695	4.2e-05	0.001313	2.4e-05	4.09757	1.48635	1003.44
RT_17NZ46 - 3	349.1	7.1	1.46723	0.00015	1.88691	0.00011	0.282704	2.9e-05	0.001012	2.9e-05	4.67476	1.02631	973.707
RT_17NZ46 - 4	349.8	8.4	1.46718	0.00014	1.88691	9.6e-05	0.282708	3.3e-05	0.001534	3.3e-05	4.71045	1.16787	971.991
RT_17NZ46 - 5	379.1	9.1	1.46694	0.00016	1.88678	0.00012	0.282742	2.5e-05	0.000689	5.4e-05	6.75159	0.884811	865.184
RT_17NZ46 - 6	345.8	9.6	1.46716	0.00011	1.88679	0.00011	0.282694	2.4e-05	0.000873	1.6e-05	4.28117	0.849355	996.126
RT_17NZ46 - 7	337	7.4	1.46719	0.00019	1.88689	9.3e-05	0.28269	3.6e-05	0.001614	3.4e-05	3.78251	1.27401	1020.85
RT_17NZ46 - 8	349	5.5	1.46725	0.00013	1.88684	0.00011	0.282703	2.8e-05	0.001212	1.1e-05	4.59093	0.990921	978.961
RT_17NZ46 - 9	286	4.2	1.46723	0.00017	1.88692	0.00011	0.282652	2.8e-05	0.003268	8.4e-05	1.04013	0.990782	1154.4
RT_17NZ46 - 10	334.1	8.6	1.46721	0.00013	1.88684	0.00012	0.282695	3e-05	0.0007301	4e-06	4.09349	1.06167	998.783
RT_17NZ46 - 11	349.8	7.6	1.46706	0.00017	1.88681	0.00011	0.282697	3e-05	0.001261	5.5e-05	4.38447	1.0617	992.728
RT_17NZ46 - 12	353.5	8.3	1.46726	0.00013	1.88682	0.00012	0.282687	2.3e-05	0.0009148	6.3e-06	4.19131	0.813979	1007.95
RT_17NZ46 - 13	351.8	5.6	1.46705	0.00013	1.88686	0.00011	0.282754	3.1e-05	0.001445	8.6e-05	6.40184	1.0971	865.851
RT_17NZ46 - 14	314.7	4.9	1.46715	0.00014	1.8869	0.00012	0.282696	2.6e-05	0.001581	5.3e-05	3.5274	0.920071	1019.38
RT_17NZ46 - 15	351	7.3	1.46715	0.00013	1.88691	0.00012	0.282689	3.1e-05	0.001037	5.3e-05	4.17929	1.0971	1006.73
RT_17NZ46 - 16	352.6	8.6	1.46721	0.00015	1.88687	0.00014	0.28272	2.5e-05	0.001297	1.4e-05	5.25028	0.884758	939.852
RT_17NZ46 - 17	316.3	3.9	1.46716	0.00018	1.88681	0.00011	0.282662	3.1e-05	0.002957	7.4e-05	2.06989	1.09701	1113.17
RT_17NZ46 - 18	319.1	8.2	1.46722	0.00014	1.88684	0.00011	0.282704	2.8e-05	0.00222	0.00012	3.76905	0.990855	1007.51
RT_17NZ46 - 19	346.6	7.3	1.46696	0.00015	1.88684	0.00011	0.282731	3.4e-05	0.00178	0.00011	5.39963	1.20326	925.586
RT_17NZ46 - 20	343.2	4.4	1.46721	0.00014	1.88688	8.4e-05	0.282684	2.5e-05	0.0014255	4.8e-06	3.74498	0.88474	1028.15
RT_17NZ46 - 21	363.1	4.3	1.46717	0.00013	1.88684	0.00011	0.282672	2e-05	0.001406	2.3e-05	3.751	0.707823	1043.55
RT_17NZ46 - 22	357.4	6.6	1.46719	0.00011	1.8868	0.00014	0.282682	2.3e-05	0.001194	7.4e-05	4.03303	0.813986	1021.1
17NZ84
RT_17NZ84 - 1	359.9	5	1.46721	0.00015	1.88674	7.8e-05	0.282623	2.4e-05	0.001299	4.2e-06	1.97382	0.849382	1153.84
RT_17NZ84 - 2	375.7	6.3	1.46712	0.00015	1.88679	9.8e-05	0.282702	2.6e-05	0.001399	1.8e-05	5.08451	0.920196	968.717
RT_17NZ84 - 3	355.1	3.3	1.46723	0.00013	1.88685	6.7e-05	0.282643	2.5e-05	0.001625	2.2e-05	2.50174	0.884763	1116.54
RT_17NZ84 - 4	377.6	9.1	1.4672	0.00016	1.88673	0.00012	0.282653	2.6e-05	0.000799	1.8e-05	3.54126	0.9202	1068.37
RT_17NZ84 - 5	354.1	3.2	1.46721	0.00012	1.88674	0.00012	0.282647	2.5e-05	0.002781	3.3e-05	2.35066	0.884761	1125.34
RT_17NZ84 - 6	358.6	4.6	1.46709	0.00013	1.88688	8.5e-05	0.282647	1.7e-05	0.00155	6.5e-05	2.73559	0.601644	1104.48
RT_17NZ84 - 7	356.6	3.4	1.46714	0.00015	1.88681	8.5e-05	0.282657	2.6e-05	0.002738	1.1e-05	2.766	0.920157	1100.96
RT_17NZ84 - 8	357.2	6.5	1.46713	0.00012	1.88676	0.00013	0.282667	2.4e-05	0.00118	1.5e-05	3.50117	0.849377	1054.75
RT_17NZ84 - 9	346.3	3.6	1.46721	0.00018	1.88685	0.0001	0.282604	3e-05	0.003761	5.7e-05	0.444026	1.06169	1239.99
RT_17NZ84 - 10	367.8	4.5	1.4672	0.00013	1.88681	8.8e-05	0.28265	3e-05	0.001034	1.1e-05	3.16381	1.06175	1084.58
RT_17NZ84 - 11	350.9	3.4	1.46716	0.00015	1.88688	0.00011	0.282642	2.6e-05	0.00302	7.3e-05	2.05251	0.920145	1141.71
RT_17NZ84 - 12	375	17	1.46714	0.00018	1.88685	0.00013	0.282679	2.8e-05	0.000793	7.5e-05	4.40617	0.990979	1011.33
RT_17NZ84 - 13	358.6	4.8	1.46711	0.00013	1.88669	9.6e-05	0.282597	2.2e-05	0.001566	3.9e-05	0.962246	0.778598	1216.93
RT_17NZ84 - 14	345.1	2.4	1.46721	0.00014	1.8868	0.00012	0.282654	2.3e-05	0.00202	0.00024	2.58796	0.813964	1103.14
RT_17NZ84 - 15	353.5	3.6	1.46716	0.00018	1.88679	0.0001	0.282643	2.7e-05	0.002549	1.2e-05	2.25117	0.955541	1131.17
RT_17NZ84 - 16	350.5	7.8	1.46719	0.00014	1.8869	9.3e-05	0.282703	2.5e-05	0.001617	1.5e-05	4.52915	0.884754	984.08
RT_17NZ84 - 17	364.2	3.7	1.46702	0.00014	1.88689	7.7e-05	0.282656	2.5e-05	0.001241	9.6e-05	3.24815	0.884781	1076.37
RT_17NZ84 - 18	363.5	6.7	1.46718	0.00013	1.88679	0.00011	0.282618	2.4e-05	0.001978	2.9e-05	1.7106	0.849389	1173.39
RT_17NZ84 - 19	346.3	2.8	1.4672	0.00016	1.88694	8.7e-05	0.282648	3.3e-05	0.00357	2e-05	2.04502	1.16786	1138.54
RT_17NZ84 - 20	351.4	3.9	1.46715	0.00017	1.88685	0.00013	0.28265	3.2e-05	0.00281	0.00011	2.39472	1.13249	1120.4
RT_17NZ84 - 21	358.1	3.6	1.46712	0.00021	1.88686	0.0001	0.282624	3.1e-05	0.003075	2.6e-05	1.5489	1.09711	1179.36
RT_17NZ84 - 22	348.7	7.7	1.46732	0.00013	1.88686	0.00012	0.282643	2.6e-05	0.001098	1.7e-05	2.48741	0.920141	1112.38
RT_17NZ84 - 23	352.8	3.7	1.46723	0.00011	1.88689	7.2e-05	0.282652	2.7e-05	0.001026	1.6e-05	2.91142	0.955539	1088.71
17NZ87
RT_17NZ87 - 1	282	6.1	1.46713	0.00018	1.88693	0.00014	0.282734	2.7e-05	0.00621	0.00012	3.31155	0.955388	1007.15
RT_17NZ87 - 2	286.2	3.9	1.4671	0.00016	1.88673	0.00014	0.282699	3.8e-05	0.00812	0.00011	1.78741	1.34463	1107.2
RT_17NZ87 - 3	300	16	1.46718	0.00013	1.88679	0.00014	0.282835	2.7e-05	0.000955	2.9e-05	8.25763	0.955427	706.349
RT_17NZ87 - 4	284.4	5.4	1.46703	0.00017	1.88675	0.00015	0.282749	3.4e-05	0.004777	3.8e-05	4.15596	1.20309	955.396
RT_17NZ87 - 5	286.7	5.6	1.4672	0.00016	1.88681	0.00011	0.282769	2.6e-05	0.003283	8.8e-05	5.19144	0.920013	891.346
RT_17NZ87 - 6	244.6	6.6	1.46722	0.00015	1.88701	0.00016	0.282785	3e-05	0.002102	5.2e-05	5.101	1.06145	863.71
RT_17NZ87 - 7	289	12	1.46717	0.00015	1.88686	0.00012	0.28285	3.2e-05	0.001171	8.5e-06	8.50832	1.13233	681.611
RT_17NZ87 - 8	284.3	4.6	1.46713	0.00012	1.88693	0.00012	0.282775	2.2e-05	0.0025391	8.7e-06	5.49549	0.778468	870.084
RT_17NZ87 - 9	285.8	7.9	1.46718	0.00015	1.88685	0.00012	0.282818	2.8e-05	0.00272	0.00015	7.01376	0.990781	774.504
RT_17NZ87 - 10	281.2	4.6	1.46726	0.00013	1.88685	0.00013	0.282777	2.6e-05	0.002986	6.5e-05	5.41903	0.920002	872.494
17NZ94
RT_17NZ94 - 1	339.3	5.3	1.46724	0.00015	1.88685	0.0001	0.282632	3.1e-05	0.00262	9.4e-05	1.55263	1.09707	1164.21
RT_17NZ94 - 2	377	10	1.46708	0.00016	1.88686	0.0001	0.282718	3.1e-05	0.001361	2.4e-05	5.68816	1.09716	931.307
RT_17NZ94 - 3	354.2	3.8	1.46727	0.00016	1.88683	0.00012	0.282613	4e-05	0.002985	1.7e-05	1.10154	1.41562	1204.61
RT_17NZ94 - 4	356.5	8.9	1.46722	0.0002	1.88689	9.9e-05	0.282663	3.5e-05	0.001407	2.6e-05	3.29086	1.23867	1067.55
RT_17NZ94 - 5	334.3	5.3	1.46732	0.00012	1.88698	0.00011	0.282636	2.5e-05	0.002197	7.5e-05	1.6849	0.884722	1151.86
RT_17NZ94 - 6	352	6.6	1.46714	0.00012	1.88691	0.00014	0.282678	3.2e-05	0.001709	1.8e-05	3.65485	1.13249	1040.86
RT_17NZ94 - 7	348.5	5.2	1.46721	0.00018	1.88693	0.00013	0.282713	2.4e-05	0.00277	0.0001	4.57413	0.84936	979.633
RT_17NZ94 - 8	331.2	6.5	1.46709	0.00012	1.88679	0.00013	0.282683	2.8e-05	0.001283	1.5e-05	3.48406	0.990882	1035.22
RT_17NZ94 - 9	341.4	3.3	1.46717	0.00014	1.88672	7.9e-05	0.282634	2.6e-05	0.003423	1.3e-05	1.48496	0.920125	1170.16
RT_17NZ94 - 10	346.5	7.7	1.46713	0.00013	1.88685	0.00013	0.282691	3.2e-05	0.001558	9e-06	4.03291	1.13248	1012.47
RT_17NZ94 - 11	339.8	5.4	1.46709	0.00014	1.88689	9.2e-05	0.282672	3.3e-05	0.001427	4.9e-05	3.2472	1.16785	1057.08
RT_17NZ94 - 12	340.8	9.8	1.46722	0.00014	1.88677	0.0001	0.282693	2.9e-05	0.001003	1.9e-05	4.10755	1.02629	1003.2
RT_17NZ94 - 13	328.8	8.5	1.46714	0.00016	1.88691	0.00011	0.282737	2.7e-05	0.001351	1.1e-05	5.32864	0.955488	915.995
RT_17NZ94 - 14	355.3	3.8	1.46712	0.00018	1.88682	6.8e-05	0.282612	2.8e-05	0.001862	6.7e-05	1.35306	0.990935	1189.55
RT_17NZ94 - 15	339.5	6.6	1.46727	0.00015	1.88691	0.00011	0.282684	2.3e-05	0.000847	2.2e-05	3.79596	0.813954	1021.98
17NZ96
RT_17NZ96 - 1	305	4	1.46707	0.00021	1.88692	0.00013	0.282704	3.2e-05	0.00703	0.00016	2.50291	1.13237	1076.73
RT_17NZ96 - 2	278.6	6.6	1.46709	0.00023	1.88699	0.00012	0.282685	3.8e-05	0.00385	0.00019	1.95134	1.34461	1090.78
RT_17NZ96 - 3	310.5	3.9	1.46716	0.00018	1.88687	0.00012	0.282667	3.5e-05	0.00621	0.00018	1.45943	1.23854	1147.27
RT_17NZ96 - 4	295.4	8.2	1.46711	0.00015	1.88673	0.00012	0.282715	3.4e-05	0.004822	9.4e-05	3.15473	1.20312	1027.74
RT_17NZ96 - 5	285.2	5	1.46726	0.00012	1.88688	0.00012	0.282677	2.5e-05	0.00224	3.9e-05	2.10284	0.884625	1086.41
RT_17NZ96 - 6	283.4	5.3	1.46661	0.00021	1.88684	0.00012	0.282769	3.4e-05	0.00182	0.00011	5.39959	1.20309	875.477
RT_17NZ96 - 7	301.8	4	1.46719	0.00017	1.88679	0.0001	0.282718	2.7e-05	0.00196	4.7e-05	3.95556	0.95543	981.937
RT_17NZ96 - 8	307.4	4.5	1.46734	0.00017	1.88679	9.8e-05	0.282683	2.9e-05	0.00157	0.00014	2.91423	1.02622	1052.53
RT_17NZ96 - 9	305.6	2.7	1.4671	0.00015	1.88685	4.4e-05	0.282668	1.7e-05	0.001828	2.8e-05	2.29287	0.601572	1090.54
RT_17NZ96 - 10	326.4	3.7	1.46739	0.00015	1.88686	9.7e-05	0.282687	2.9e-05	0.00189	0.00022	3.39116	1.02626	1037.31
RT_17NZ96 - 11	313.5	8.1	1.46702	0.0002	1.88685	0.00012	0.282708	4.7e-05	0.00431	0.00023	3.35961	1.6632	1029.08
RT_17NZ96 - 12	292	5.5	1.46718	0.00017	1.88686	0.00013	0.282678	2.8e-05	0.006018	8.4e-05	1.5491	0.990795	1126.91
RT_17NZ96 - 13	327.7	3.7	1.46709	0.00013	1.88689	0.00011	0.282708	2.3e-05	0.00425	0.00022	3.64919	0.813932	1021.95
RT_17NZ96 - 14	254.2	7.1	1.46714	0.00016	1.88699	0.00013	0.282707	3e-05	0.00384	0.00027	2.24941	1.06148	1052.51
RT_17NZ96 - 15	303.8	6.3	1.46709	0.00019	1.88699	0.00015	0.282763	3.8e-05	0.00318	0.0002	5.34445	1.34469	895.165
OU49226
RT_OU49226 - 1	354.8	9.7	1.46712	0.00017	1.88691	9.5e-05	0.28244	3e-05	0.001151	2.9e-05	-4.57743	1.06172	1563.68
RT_OU49226 - 2	353.1	6	1.46721	0.00013	1.88691	0.00011	0.282414	2.9e-05	0.001056	5.7e-05	-5.51201	1.02632	1621.11
RT_OU49226 - 3	348	3.7	1.46725	0.00015	1.88677	0.00011	0.282456	2.9e-05	0.000852	2e-05	-4.0889	1.02631	1527.53
RT_OU49226 - 4	345.6	7.5	1.4672	0.00015	1.88691	0.00011	0.282443	3e-05	0.000958	6.2e-05	-4.62549	1.06169	1559.4
RT_OU49226 - 5	361.2	9	1.46715	0.00012	1.88681	0.00011	0.282412	2.4e-05	0.001116	4.5e-05	-5.42192	0.849384	1621.88
RT_OU49226 - 6	537	9.6	1.46716	0.00013	1.88683	0.0001	0.282318	3.1e-05	0.00243	0.00011	-5.41428	1.09755	1760.88
RT_OU49226 - 7	353.7	6.6	1.46717	0.00014	1.88682	8.8e-05	0.282438	2.8e-05	0.000627	4.9e-05	-4.54907	0.990932	1561.02
RT_OU49226 - 8	372	14	1.4669	0.00019	1.88693	0.00012	0.282434	3.3e-05	0.00119	0.00012	-4.42828	1.16793	1567.94
RT_OU49226 - 9	345.6	8.2	1.46722	0.00011	1.88683	9.7e-05	0.282421	2.7e-05	0.000987	3.4e-05	-5.41071	0.955524	1608.79
RT_OU49226 - 10	340.7	6.6	1.4671	0.00016	1.8869	0.00011	0.282444	2.1e-05	0.00267	0.00035	-5.08302	0.743177	1584.3
RT_OU49226 - 11	564	12	1.46724	0.00016	1.88699	9e-05	0.282342	2.7e-05	5.1e-05	1e-05	-3.1111	0.955991	1637.24
RT_OU49226 - 12	695	13	1.46721	0.00017	1.88688	0.00011	0.282388	3.4e-05	0.001015	4.4e-05	1.01176	1.2042	1480.34
RT_OU49226 - 13	799	18	1.46713	0.00015	1.88676	0.00011	0.282432	3.7e-05	0.001007	2.5e-05	4.84785	1.31076	1318.9
RT_OU49226 - 14	531	11	1.46717	0.00016	1.88682	0.00012	0.282407	3.3e-05	0.000987	3.2e-05	-1.87907	1.16835	1533.33
RT_OU49226 - 15	344.5	5.3	1.46717	0.00014	1.88678	0.0001	0.282413	2.2e-05	0.001657	1.7e-05	-5.87067	0.778573	1636.83
RT_OU49226 - 16	346.2	9.6	1.46715	0.00017	1.88676	0.00012	0.282425	2.8e-05	0.001296	8.8e-05	-5.32706	0.990915	1604.01
RT_OU49226 - 17	469.2	9.8	1.46723	0.00017	1.88687	8.6e-05	0.282391	2.2e-05	0.000773	7.9e-06	-3.72309	0.77879	1600.65
RT_OU49226 - 18	356	6.7	1.46718	0.00012	1.88686	0.00011	0.282437	2.6e-05	0.0008876	9e-06	-4.59555	0.920156	1565.77
RT_OU49226 - 19	338.5	4.4	1.46723	0.00013	1.88692	8.5e-05	0.282418	2.8e-05	0.000954	1.6e-05	-5.66336	0.990898	1619.04
RT_OU49226 - 20	787.6	8.8	1.46725	0.00015	1.88691	0.0001	0.281913	2.9e-05	0.000738	2e-05	-13.6461	1.02732	2474.87
P52355
RT_P52355 - 1	325.1	5.1	1.46723	0.00019	1.8869	8e-05	0.28228	3.1e-05	0.001861	4.7e-05	-11.033	1.09703	1944.82
RT_P52355 - 2	396	5.3	1.46721	0.00013	1.88684	9.9e-05	0.282287	2.8e-05	0.001109	3.8e-05	-9.09243	0.991025	1879.79
RT_P52355 - 3	337.6	5.2	1.4672	0.00014	1.88696	9.6e-05	0.282281	3e-05	0.000984	1.4e-05	-10.5379	1.06167	1923.82
RT_P52355 - 4	429.8	5.1	1.46717	0.00017	1.88685	0.0001	0.282337	3.1e-05	0.0006989	4.1e-06	-6.47498	1.09729	1742.5
RT_P52355 - 5	370.6	7.3	1.46724	0.00019	1.88677	0.00012	0.282306	3.1e-05	0.0010124	8.7e-06	-8.94495	1.09714	1850.39
RT_P52355 - 6	361.2	5.5	1.46707	0.00017	1.88685	7.8e-05	0.282352	3e-05	0.001015	1.7e-05	-7.52119	1.06173	1753.7
RT_P52355 - 7	372	4.1	1.46715	0.00014	1.88691	7.8e-05	0.282313	2.5e-05	0.001443	1.4e-05	-8.7731	0.884797	1840.74
RT_P52355 - 8	381.8	6.1	1.46714	0.00013	1.88676	0.00012	0.282311	3.2e-05	0.001209	1.7e-05	-8.57512	1.13256	1836.12
RT_P52355 - 9	367.6	3.8	1.46719	0.00016	1.88688	8.2e-05	0.282299	3.2e-05	0.00103	1.8e-05	-9.26197	1.13253	1867.85
RT_P52355 - 10	355.5	4	1.46715	0.00015	1.8868	9e-05	0.282273	2.6e-05	0.002629	1.9e-05	-10.8209	0.920154	1955.72
RT_P52355 - 11	372.6	6.4	1.46716	0.00015	1.88699	9.4e-05	0.282292	3.7e-05	0.001472	4.7e-05	-9.51066	1.3095	1887.38
RT_P52355 - 12	333.6	4.4	1.46713	0.00013	1.88681	8e-05	0.282299	2e-05	0.001123	2.6e-05	-10.0183	0.707777	1888.16
RT_P52355 - 13	377	5.1	1.46717	0.00015	1.88682	9.2e-05	0.282319	3.1e-05	0.001116	1.8e-05	-8.37211	1.09716	1819.59
RT_P52355 - 14	372.7	4.8	1.46716	0.00017	1.88672	0.0001	0.282336	2.8e-05	0.00149	1.9e-05	-7.95573	0.990974	1790.08
RT_P52355 - 15	376.2	7.8	1.46721	0.00014	1.88686	9.9e-05	0.282314	2.6e-05	0.000975	1.1e-05	-8.53117	0.920197	1828.92
RT_P52355 - 16	375.2	5.8	1.46716	0.00014	1.88672	0.00011	0.282336	2.7e-05	0.001471	2.1e-05	-7.89764	0.955587	1788.42
RT_P52355 - 17	373.4	5	1.46722	0.00016	1.88682	0.00011	0.282315	2.9e-05	0.001402	2.1e-05	-8.66223	1.02637	1834.9
RT_P52355 - 18	518.5	8.6	1.46713	0.00012	1.88678	8.3e-05	0.281946	3.5e-05	0.000356	1.6e-05	-18.2548	1.23912	2547.69
RT_P52355 - 19	781	8.7	1.46718	0.00014	1.88684	7.1e-05	0.282347	2e-05	0.0005193	8.8e-06	1.69656	0.708488	1504.97
P45412
RT_P45412 - 1	406.4	6	1.46718	0.00018	1.88679	9.8e-05	0.282392	3.3e-05	0.00087	1.4e-05	-5.0868	1.16802	1636.68
RT_P45412 - 2	368.4	5	1.46709	0.00014	1.88689	9.4e-05	0.282378	2.3e-05	0.001334	8.9e-05	-6.52297	0.814006	1696.78
RT_P45412 - 3	1082	11	1.46718	0.00012	1.88688	9.8e-05	0.282195	2.5e-05	0.00109	0.00014	2.6023	0.886213	1685.36
RT_P45412 - 4	398.9	6.1	1.46721	0.00015	1.88681	9.7e-05	0.282361	2.7e-05	0.000919	5.5e-05	-6.36033	0.955638	1710.77
RT_P45412 - 5	424	12	1.46722	0.00016	1.88678	6.8e-05	0.282418	2.9e-05	0.000624	2.2e-05	-3.71387	1.02648	1564.22
RT_P45412 - 6	377.3	4.4	1.46709	0.00014	1.88678	7.4e-05	0.282302	3.2e-05	0.000172	1.5e-05	-8.73112	1.13255	1842.32
RT_P45412 - 7	1654	18	1.46725	0.00015	1.88682	9.7e-05	0.281911	3e-05	0.00132	5.2e-05	4.91116	1.06484	1989.16
RT_P45412 - 8	366.1	4.7	1.46718	0.0002	1.88682	8.4e-05	0.282325	2.6e-05	0.00043	5.9e-05	-8.22863	0.920176	1801.94
RT_P45412 - 9	426.8	5.6	1.46711	0.00014	1.88678	9.9e-05	0.28233	2.3e-05	0.000451	3.4e-05	-6.71826	0.814113	1755.39
RT_P45412 - 10	1060	12	1.46721	0.00013	1.88681	9.1e-05	0.282227	2.8e-05	0.001084	2.9e-05	3.25783	0.992509	1626.32
RT_P45412 - 11	380.6	5.6	1.4673	0.00015	1.8869	0.00011	0.282371	2.5e-05	0.000708	1.2e-05	-6.35097	0.884814	1695.66
RT_P45412 - 12	450.9	7.9	1.46713	0.00015	1.88682	0.0001	0.282365	2.8e-05	0.0002594	4.7e-06	-4.89004	0.991147	1659.61
RT_P45412 - 13	494.4	6.6	1.46722	0.00012	1.88691	9.3e-05	0.282276	2.7e-05	0.000788	2.2e-05	-7.24771	0.955842	1842.27
RT_P45412 - 14	1075	23	1.46713	0.00017	1.88686	0.0001	0.282027	2.7e-05	0.0007211	7.1e-06	-3.24156	0.957094	2049.89
RT_P45412 - 15	699	10	1.4672	0.00016	1.88685	9.6e-05	0.282211	2.1e-05	0.001596	5.8e-05	-5.44018	0.743775	1890.91
P89318
P89318 - 1	313.4	5.5	1.46719	0.00012	1.88691	0.00012	0.282675	2.6e-05	0.000809	8.4e-06	2.91691	0.920068	1057.12
P89318 - 2	621	22	1.46731	0.00015	1.88684	0.00011	0.2824	2.7e-05	0.000643	3.5e-05	-0.0237459	0.956114	1487.34
P89318 - 3	326	4	1.46721	0.00014	1.88693	0.0001	0.28265	2.7e-05	0.001223	1.7e-05	2.21746	0.955482	1111.5
P89318 - 4	326.5	4.4	1.46728	0.00015	1.88665	9.2e-05	0.282657	2.9e-05	0.0012695	5.2e-06	2.46588	1.02626	1096.14
P89318 - 5	315.8	6	1.46728	0.00014	1.88684	0.00011	0.282627	2e-05	0.001261	2.1e-05	1.17605	0.707748	1169.43
P89318 - 6	326.4	4.3	1.46723	0.00014	1.88677	9.7e-05	0.282672	3.2e-05	0.0011311	3.2e-06	3.02449	1.13242	1060.6
P89318 - 7	330	4	1.46724	9.9e-05	1.88683	0.00012	0.282676	2.5e-05	0.0010901	5.8e-06	3.25274	0.884714	1048.96
P89318 - 8	391.3	5.9	1.46721	0.00012	1.88681	0.00011	0.282497	2.5e-05	0.000963	2.2e-05	-1.72348	0.884835	1412.73
P89318 - 9	535.4	8.4	1.46726	0.00012	1.88689	8.3e-05	0.282025	5.6e-05	0.000373	3.1e-05	-15.0895	1.98267	2364.65
P89318 - 10	995.2	9.1	1.46721	0.00012	1.88692	0.00011	0.282206	2.6e-05	0.0010329	7.7e-06	1.12583	0.92148	1710.53
P89318 - 11	314.8	4.4	1.46729	0.00012	1.88691	8.6e-05	0.282662	2.1e-05	0.001118	1e-05	2.42294	0.743134	1089.58
P89318 - 12	337.3	6.2	1.46724	0.00015	1.88686	8.2e-05	0.282658	2.1e-05	0.000985	5e-05	2.79707	0.743171	1083.68
P89318 - 13	323.6	5.8	1.46727	0.00014	1.8868	0.00012	0.282652	2.9e-05	0.001347	2.5e-05	2.20998	1.02625	1110.07
P89318 - 14	619	15	1.46718	0.00014	1.8868	0.0001	0.282404	2.5e-05	0.00051	0.00012	0.12856	0.885287	1476.12
P89318 - 15	320.6	5.1	1.46728	0.00013	1.88687	0.0001	0.282627	2.5e-05	0.001745	3.2e-05	1.1764	0.884695	1173.22
P89318 - 16	316.7	7.7	1.46736	0.00014	1.88703	0.0001	0.282651	3.6e-05	0.000864	1.3e-05	2.12801	1.27395	1109.8
P89318 - 17	308.6	5.7	1.4672	0.00014	1.88691	0.00011	0.282681	3e-05	0.001173	2.9e-05	2.95018	1.06161	1051.2
P89318 - 18	326	3.4	1.46729	0.00015	1.88685	9.7e-05	0.282604	1.9e-05	0.002354	1.8e-05	0.345255	0.672376	1230.14
P89318 - 19	318.5	5.2	1.46734	0.00017	1.88685	0.00014	0.282663	2.9e-05	0.001309	2.3e-05	2.49791	1.02624	1087.76
P89318 - 20	272	10	1.46735	0.00012	1.88681	0.0001	0.282619	2.8e-05	0.00142	0.0001	-0.0766628	0.990751	1213.98
P89318 - 21	308.9	6.2	1.46736	0.00015	1.88693	0.00011	0.282639	2.6e-05	0.00127	2.8e-05	1.45055	0.920059	1146.56
P89318 - 22	313.1	4.7	1.46725	0.00015	1.88686	8e-05	0.282656	2.5e-05	0.00145	0.00014	2.10503	0.88468	1108.4
P89318 - 23	325.7	3.2	1.46734	0.00015	1.88688	9.5e-05	0.282635	2e-05	0.001544	5.3e-05	1.61089	0.707764	1149.73
P89318 - 24	321.1	6.6	1.4673	0.00011	1.88692	0.00012	0.282648	2.9e-05	0.001041	3.7e-05	2.07993	1.02625	1116.34
P89318 - 25	326.4	6.3	1.46714	0.00013	1.88694	9.4e-05	0.282662	3.2e-05	0.001081	7.7e-05	2.68145	1.13242	1082.38
P52253
P52253 - 1	112.6	2.1	1.46718	0.00015	1.88683	0.00011	0.282505	2.7e-05	0.001465	7.2e-05	-7.51194	0.955028	1555.59
P52253 - 2	460	18	1.46726	0.00014	1.88688	0.00011	0.282442	3.3e-05	0.00139	0.00015	-2.3074	1.16816	1504.08
P52253 - 3	108.8	3.2	1.46721	0.00016	1.88673	0.00012	0.282485	2.5e-05	0.001643	7.1e-05	-8.31291	0.884278	1602.76
P52253 - 4	115.4	4.2	1.46713	0.00016	1.8868	9.8e-05	0.28254	3.7e-05	0.001257	1.8e-05	-6.19857	1.30875	1475.41
P52253 - 5	181	13	1.46725	0.00015	1.88676	8.9e-05	0.282451	3.4e-05	0.000348	3.3e-05	-7.83392	1.20281	1630.15
P52253 - 6	762	27	1.46731	0.00012	1.88687	7.9e-05	0.282337	2.7e-05	0.001196	9.3e-05	0.577095	0.956417	1560.92
P52253 - 7	110.3	2.8	1.46724	0.00013	1.88688	9.7e-05	0.28248	2.9e-05	0.001574	3.7e-05	-8.45304	1.02577	1612.73
P52253 - 8	110.3	4.2	1.46721	0.00011	1.88688	0.00011	0.282549	3.2e-05	0.0013299	9.8e-06	-5.99463	1.13188	1458.55
P52253 - 9	115.6	5.2	1.46734	0.00013	1.88683	0.0001	0.282545	2.7e-05	0.001087	1.7e-05	-6.00444	0.955034	1463.38
P52253 - 10	114.9	6.3	1.46727	0.00015	1.8868	9.4e-05	0.282588	2.9e-05	0.0002006	1.3e-06	-4.43118	1.02578	1363.93
P52253 - 11	152.6	9.4	1.467	0.00015	1.88675	0.0001	0.282558	3e-05	0.000588	1.4e-05	-4.69821	1.06124	1410.69
P52253 - 12	535	11	1.4673	0.00015	1.88691	0.00012	0.282299	2.1e-05	7.46e-05	8.9e-06	-5.29143	0.7435	1751.57
P52253 - 13	1367	34	1.46723	0.00011	1.88695	9.8e-05	0.282225	3.1e-05	0.000696	2.1e-05	10.3073	1.09962	1418.1
P52253 - 14	114.5	2.9	1.4673	0.00017	1.88683	0.00015	0.282454	2.6e-05	0.001482	7.7e-05	-9.27681	0.91966	1667.63
P52253 - 15	123.7	6	1.46672	0.00029	1.88704	0.00011	0.282627	4.1e-05	0.00084	0.00012	-2.90951	1.45026	1275.09
P52253 - 16	133.5	6.7	1.46722	0.00014	1.88674	0.00011	0.282578	2.3e-05	0.000897	2.7e-05	-4.43535	0.81358	1378.97
P52253 - 17	542.4	9.7	1.46721	0.00016	1.8868	7.4e-05	0.282358	3e-05	0.001077	6.3e-05	-3.39818	1.06216	1638.22
P52253 - 18	110.8	3.1	1.46727	0.00015	1.88675	9.3e-05	0.282478	3.1e-05	0.001729	1.9e-05	-8.52455	1.09651	1617.6
P52253 - 19	546.9	7.2	1.46721	0.00017	1.88688	9.1e-05	0.282346	2.7e-05	0.0008263	1.2e-06	-3.63425	0.955955	1656.67
P52253 - 20	112	3.5	1.46735	0.00016	1.88693	0.0001	0.282491	3e-05	0.001198	4e-05	-8.00012	1.06114	1585.71
P45394
P45394 - 1	364.4	5	1.46723	0.00013	1.88687	0.00011	0.282457	2.8e-05	0.00151	1.3e-05	-3.85539	0.990955	1525.84
P45394 - 2	365.1	3.9	1.46728	0.00015	1.88684	0.0001	0.282444	3.1e-05	0.00226	1e-05	-4.48209	1.09713	1565.86
P45394 - 3	522	15	1.46713	0.00014	1.88692	8.5e-05	0.282392	2.3e-05	0.000306	7.4e-05	-2.36989	0.814286	1557.19
P45394 - 4	374.4	6.1	1.46714	0.00014	1.88685	0.00011	0.282501	2.8e-05	0.001414	8.3e-05	-2.06088	0.990977	1420.62
P45394 - 5	367.2	5.2	1.46733	0.00015	1.88694	0.00011	0.282428	2.4e-05	0.001702	2.3e-05	-4.86874	0.849396	1591.85
P45394 - 6	366.8	5.5	1.4673	0.00016	1.88684	9.7e-05	0.282439	2.4e-05	0.001449	3.7e-05	-4.42638	0.849395	1563.7
P45394 - 7	371.7	7.8	1.46723	0.00013	1.88682	0.00011	0.282432	2.4e-05	0.000766	2.5e-05	-4.40103	0.849404	1565.99
P45394 - 8	369.6	4.9	1.46729	0.00014	1.88682	9e-05	0.282413	2.2e-05	0.001481	8.6e-05	-5.29454	0.778617	1620.54
P45394 - 9	367.2	5.9	1.46741	0.00015	1.88689	0.0001	0.282438	3.1e-05	0.001376	4.1e-05	-4.43545	1.09714	1564.59
P45394 - 10	374.6	7.8	1.46712	0.00016	1.8868	0.0001	0.282467	3.2e-05	0.001319	1.4e-05	-3.23634	1.13255	1494.93
P45394 - 11	372	5.3	1.46728	0.00015	1.88686	9.6e-05	0.282467	2.4e-05	0.001538	3.9e-05	-3.34618	0.849405	1499.79
P45394 - 12	374.3	4.1	1.46731	0.00015	1.88682	9.3e-05	0.282442	2.2e-05	0.001649	8.7e-05	-4.20948	0.778625	1556
P45394 - 13	531	16	1.46734	0.00016	1.88683	9.1e-05	0.282413	3.4e-05	0.000779	5.2e-05	-1.59327	1.20375	1515.28
P45394 - 14	953	20	1.46709	0.00016	1.88691	0.00011	0.282263	2.9e-05	0.00072	6.1e-05	2.41877	1.02771	1595.12
P45394 - 15	367.4	5.4	1.46722	0.00011	1.88678	8.8e-05	0.282483	2.5e-05	0.00064	2.7e-05	-2.65926	0.884787	1452.83
P45394 - 16	375.2	4.9	1.46722	0.00012	1.88694	0.0001	0.282467	2.7e-05	0.001504	9.1e-05	-3.26948	0.955587	1497.49
P45394 - 17	372.3	4	1.46721	0.00014	1.88678	9.8e-05	0.282489	2.3e-05	0.001806	3.8e-05	-2.62732	0.814013	1454.7
P45394 - 18	396.2	7.9	1.46729	0.00016	1.8869	7.4e-05	0.282408	2.2e-05	0.001922	4.1e-05	-5.0191	0.778663	1624.33
P45394 - 19	394	13	1.46728	0.00013	1.88688	0.00013	0.282465	2.9e-05	0.001216	1.7e-05	-2.86354	1.02641	1486.82
P45394 - 20	364.2	4.7	1.4673	0.00015	1.88693	8.8e-05	0.282455	3.1e-05	0.001692	1.6e-05	-3.97439	1.09713	1533.18
P64999
P64999 - 1	372.6	9.8	1.46729	0.00011	1.88694	0.00011	0.282403	3.2e-05	0.001131	7.2e-05	-5.49792	1.13254	1635.71
P64999 - 2	359.6	7.9	1.4672	0.00016	1.88697	0.00012	0.28242	2.4e-05	0.001195	2.7e-05	-5.19218	0.849381	1606.16
P64999 - 3	369.2	5.1	1.46725	0.0001	1.8868	0.00011	0.282467	2.8e-05	0.001768	5.1e-05	-3.46219	0.990966	1504.88
P64999 - 4	344.2	4.7	1.46727	0.00016	1.88683	8.8e-05	0.282457	2.5e-05	0.0019754	7.3e-06	-4.39254	0.884742	1543.63
P64999 - 5	346	3.7	1.46728	0.00014	1.88685	9.1e-05	0.28245	2.5e-05	0.001848	1.9e-05	-4.57321	0.884745	1556.43
P64999 - 6	351	7.3	1.46719	0.00017	1.88693	0.00011	0.282449	3.1e-05	0.001577	5.2e-05	-4.44001	1.0971	1552.02
P64999 - 7	349.2	5.4	1.46725	0.00011	1.8868	0.00012	0.282449	1.9e-05	0.001587	3.1e-05	-4.48064	0.672411	1553.14
P64999 - 8	342.2	4.7	1.4673	0.00017	1.88676	7.3e-05	0.282448	2.4e-05	0.0017021	8.5e-06	-4.69109	0.849348	1560.83
P64999 - 9	340.5	5.3	1.46726	0.00015	1.88686	8.5e-05	0.282458	1.5e-05	0.001569	1.4e-05	-4.3432	0.530841	1537.59
P64999 - 10	345.9	4.7	1.46725	0.00018	1.88683	8.3e-05	0.28241	3.4e-05	0.0033	0.00012	-6.32383	1.20325	1666.41
P64999 - 11	344.1	5.6	1.46729	0.00017	1.88689	0.00012	0.282456	2.9e-05	0.001372	4.9e-05	-4.2924	1.0263	1537.25
P64999 - 12	344.7	6.6	1.46722	0.00015	1.88699	9.2e-05	0.28246	2.6e-05	0.001263	8.3e-05	-4.11308	0.920132	1526.43
P64999 - 13	354	11	1.46729	0.00013	1.88685	9.2e-05	0.282464	2.7e-05	0.001367	7.7e-05	-3.79601	0.955542	1513.85
P64999 - 14	347.6	9.2	1.46728	0.00015	1.88685	0.00013	0.282437	2.6e-05	0.001612	1.6e-05	-4.94513	0.920138	1581.1
P64999 - 15	501	12	1.46732	0.00013	1.88703	8.5e-05	0.282348	2.7e-05	0.0009716	3.2e-06	-4.61547	0.955856	1682.07
P64999 - 16	346.3	6.8	1.4672	0.00012	1.88682	0.00011	0.282426	2.6e-05	0.001869	3e-05	-5.42105	0.920136	1610
P64999 - 17	342.5	6.1	1.46724	0.00015	1.88679	9.7e-05	0.28246	2.9e-05	0.001632	4.5e-05	-4.24414	1.0263	1532.94
P64999 - 18	358	13	1.46715	0.00013	1.88686	8.5e-05	0.282453	2.6e-05	0.0011578	4e-06	-4.04993	0.92016	1533.01
P64999 - 19	348	12	1.46721	0.00012	1.88686	9.9e-05	0.282509	2.4e-05	0.001161	7.4e-05	-2.28451	0.849359	1413.79
P64999 - 20	345.1	6.8	1.46717	0.00014	1.88686	0.00012	0.282488	3.3e-05	0.00183	2.8e-05	-3.24327	1.16786	1471.95
P64999 - 21	348.7	7.8	1.46716	0.00013	1.88692	0.00012	0.282451	2.2e-05	0.001475	3.7e-05	-4.39461	0.77858	1547.33
P64999 - 22	346.7	8.2	1.46724	0.00011	1.88679	0.00012	0.282453	2.2e-05	0.001596	5.4e-05	-4.39435	0.778577	1545.73
P64999 - 23	777	40	1.4672	0.00012	1.8868	7.3e-05	0.281896	6.1e-05	0.00097	0.00012	-14.6018	2.16087	2525.99
P64999 - 24	346.9	4.2	1.46721	0.00011	1.88692	9.7e-05	0.282441	2.2e-05	0.00258	0.00013	-5.04105	0.778577	1586.58
P64999 - 25	340.9	4.3	1.46735	0.00016	1.88687	8.1e-05	0.282434	2.6e-05	0.00204	0.00017	-5.29045	0.920124	1597.5
P38707
P38707 - 1	320.9	4.6	1.46733	0.00012	1.88695	9.9e-05	0.282616	2.9e-05	0.001968	1.4e-05	0.746066	1.02625	1200.71
P38707 - 2	321.3	7.2	1.46724	0.00018	1.88693	0.0001	0.282591	2.8e-05	0.001366	4e-05	-0.00204268	0.99086	1248.38
P38707 - 3	323.8	3.4	1.46724	0.00014	1.88677	8.1e-05	0.282633	2.8e-05	0.001188	1e-05	1.57601	0.990865	1150.43
P38707 - 4	317.6	5.3	1.46724	0.00016	1.88689	0.00013	0.282606	3.1e-05	0.001729	5.7e-05	0.373106	1.09701	1221.71
P38707 - 5	326.6	5.7	1.46726	0.00013	1.88694	0.00012	0.282588	2.4e-05	0.002149	1.3e-05	-0.164124	0.849319	1262.84
P38707 - 6	324	5.5	1.4673	0.00013	1.88689	9.6e-05	0.282628	2.1e-05	0.001352	4.7e-05	1.36817	0.743149	1163.76
P38707 - 7	325.3	8	1.46708	0.00015	1.88688	6.7e-05	0.282635	3.2e-05	0.001512	3.3e-05	1.60927	1.13242	1149.51
P38707 - 8	330.6	4.6	1.46738	0.00013	1.88692	0.0001	0.282574	3.3e-05	0.00245	0.00014	-0.641885	1.16782	1296.23
P38707 - 9	322.8	3.3	1.46724	0.00011	1.88681	0.0001	0.282607	2.4e-05	0.002642	4.5e-05	0.323346	0.849311	1228.98
P38707 - 10	324.2	4.6	1.46709	0.00012	1.88694	0.00012	0.282641	2.7e-05	0.00201	0.00012	1.69113	0.955478	1143.45
P38707 - 11	325.6	6.2	1.4673	0.00014	1.8869	0.00013	0.282592	2.4e-05	0.001446	1.2e-05	0.108215	0.849317	1244.82
P38707 - 12	331.4	4.5	1.46724	9.6e-05	1.88691	7.5e-05	0.282558	2.5e-05	0.002337	2.3e-05	-1.16672	0.884716	1330.04
P38707 - 13	309.7	6.1	1.46719	0.00012	1.88688	8.8e-05	0.2826	2.4e-05	0.00196	0.00012	-0.053946	0.849286	1242.46
P38707 - 14	325.9	4.1	1.46724	0.00012	1.88697	9.5e-05	0.282624	2.5e-05	0.001907	3.4e-05	1.14748	0.884705	1179.25
P38707 - 15	299	13	1.46704	0.00012	1.8869	8.5e-05	0.282669	2.5e-05	0.001327	2.6e-05	2.28815	0.884652	1085.6
P38707 - 16	318.7	5.2	1.46725	0.00011	1.88682	9.8e-05	0.282565	2.3e-05	0.001773	2.4e-05	-1.06378	0.813916	1313.45
P38707 - 17	331.9	4.3	1.46722	0.0001	1.88681	0.00011	0.28259	1.8e-05	0.002154	2.6e-05	0.016364	0.636996	1255.63
P38707 - 18	320	5	1.46723	0.00014	1.88687	0.00011	0.282601	3.1e-05	0.0014082	8e-06	0.315034	1.09702	1227.29
P38707 - 19	317.7	3.5	1.46732	0.00014	1.88695	7.9e-05	0.2826	2.3e-05	0.001771	4.8e-05	0.154057	0.813914	1235.65
P38707 - 20	334	7.1	1.4672	0.00014	1.88688	0.00011	0.282562	2e-05	0.001609	6.2e-05	-0.809976	0.707777	1309.55
P38707 - 21	326.6	7.2	1.46721	0.00015	1.88681	9.7e-05	0.282621	2.9e-05	0.001305	1.3e-05	1.18637	1.02626	1177.35
P38707 - 22	308.7	3.2	1.46726	0.00014	1.88683	0.00011	0.282616	2.4e-05	0.001927	6.8e-05	0.497969	0.849285	1206.74
P38707 - 23	323.8	4.4	1.46723	0.00013	1.88687	9.5e-05	0.282615	2.6e-05	0.001581	1.7e-05	0.854699	0.920089	1196.13
P38707 - 24	335	10	1.46702	0.00014	1.88687	0.0001	0.282616	2.8e-05	0.001138	1.7e-05	1.22687	0.99089	1181.44
P38707 - 25	326.5	6.3	1.46718	0.00013	1.88675	0.00012	0.282592	2.9e-05	0.001166	2.1e-05	0.188037	1.02626	1240.48
P89642
P89642 - 1	362.9	6.8	1.46727	0.00014	1.88691	0.00011	0.282435	3.1e-05	0.00128	3.8e-05	-4.61067	1.09713	1572.2
P89642 - 2	350.2	7.2	1.46727	0.00016	1.88677	0.00012	0.282463	2.7e-05	0.001025	3.1e-05	-3.83343	0.955534	1513.19
P89642 - 3	354.6	5.2	1.46731	0.00013	1.88693	0.0001	0.282464	2.5e-05	0.001456	2.2e-05	-3.80407	0.884762	1514.83
P89642 - 4	355	11	1.46725	0.00017	1.88689	0.00012	0.282432	2.4e-05	0.000723	2.6e-05	-4.75551	0.849372	1575.05
P89642 - 5	350	15	1.46723	0.00014	1.88695	9.8e-05	0.28247	3.3e-05	0.000384	3.1e-05	-3.44131	1.16787	1488.32
P89642 - 6	352	4.4	1.46715	0.00013	1.88692	7.4e-05	0.282445	2.3e-05	0.001692	1.8e-05	-4.58712	0.813976	1562.07
P89642 - 7	1195	62	1.46716	0.00015	1.88698	8.1e-05	0.282056	4.7e-05	0.00053	3.3e-05	0.606513	1.66651	1901.25
P89642 - 8	370	14	1.46732	8.3e-05	1.88694	9.9e-05	0.282399	3.1e-05	0.001022	4.6e-05	-5.66888	1.09714	1644.39
P89642 - 9	363.5	6.4	1.46722	0.00014	1.88671	8.6e-05	0.28245	2.3e-05	0.001119	1.4e-05	-4.0281	0.813997	1536
P89642 - 10	345.4	5.1	1.46729	0.00015	1.88689	9.8e-05	0.282401	2.5e-05	0.00143	2.3e-05	-6.22427	0.884744	1659.76
P89642 - 11	348.9	5.4	1.46722	0.00012	1.88684	0.0001	0.282476	2.9e-05	0.0011861	2.2e-06	-3.43877	1.02631	1487.29
P89642 - 12	354.2	6.3	1.46721	0.00014	1.88697	0.00011	0.282441	2.6e-05	0.001925	7.1e-05	-4.73672	0.920152	1573.23
P89642 - 13	348.2	7	1.4673	0.00014	1.88687	9.3e-05	0.282458	2.5e-05	0.001009	2.7e-05	-4.05	0.884749	1525.24
P89642 - 14	349.4	9.3	1.46727	0.0001	1.88686	9.8e-05	0.282486	2.9e-05	0.000905	1.1e-05	-3.00899	1.02631	1460.6
P89642 - 15	356.2	9.1	1.46717	0.00013	1.88688	8.2e-05	0.282517	3.1e-05	0.000868	6.9e-05	-1.75532	1.09711	1386.89
P89642 - 16	641	13	1.46738	0.00013	1.88686	0.00014	0.282379	2.6e-05	0.001084	3e-05	-0.514481	0.920744	1534.24
P89642 - 17	391	24	1.46707	0.00015	1.88684	0.00011	0.282466	2.5e-05	0.000762	8.2e-05	-2.77507	0.884834	1478.86
P89642 - 18	361	12	1.46722	0.00018	1.8868	0.00013	0.282418	3.5e-05	0.000847	6.4e-05	-5.14951	1.23868	1604.59
P89642 - 19	343	6.5	1.46712	0.00016	1.88681	0.00012	0.282497	3e-05	0.001247	6.5e-05	-2.83657	1.06169	1444.65
P89642 - 20	924	18	1.46714	0.00012	1.88675	0.00013	0.282343	2.8e-05	0.00109	0.0001	4.38334	0.992203	1447.28
P89642 - 21	348.6	6	1.46726	0.00013	1.88691	0.00011	0.282458	2e-05	0.001424	7.4e-05	-4.13723	0.7078	1531.05
P89642 - 22	353	6.6	1.46727	0.00016	1.88692	0.0001	0.282455	2.6e-05	0.001572	7.7e-05	-4.18392	0.920149	1537.48
P89642 - 23	342	7.2	1.46726	0.00014	1.88682	0.00011	0.282458	2.8e-05	0.001123	6.3e-05	-4.21016	0.990906	1530.4
P89645
P89645 - 1	398.8	7.5	1.46716	0.00017	1.88685	7.7e-05	0.282513	2.4e-05	0.000948	9.8e-05	-0.990291	0.849456	1372.36
P89645 - 2	695	19	1.46734	0.00013	1.88686	9.1e-05	0.282415	2.6e-05	0.000957	5.8e-05	1.99486	0.920855	1418
P89645 - 3	390.3	5.8	1.46716	9.8e-05	1.88699	7.7e-05	0.282491	2.2e-05	0.00192	0.00023	-2.20528	0.778653	1442.35
P89645 - 4	367.8	6.7	1.4672	0.00011	1.88689	8.6e-05	0.282611	2.4e-05	0.001373	4.9e-05	1.70087	0.849397	1177.41
P89645 - 5	376.8	6.1	1.46712	0.00012	1.887	9.2e-05	0.282597	3.1e-05	0.00118	9e-05	1.44663	1.09716	1200.67
P89645 - 6	786	23	1.46719	0.0001	1.88686	0.00015	0.282283	3.8e-05	0.001096	5.6e-05	-0.761604	1.34614	1664.66
P89645 - 7	375.2	4.4	1.46717	0.00012	1.8868	7.5e-05	0.282581	2.9e-05	0.002657	5.6e-05	0.478366	1.02637	1260.74
P89645 - 8	366.4	6.2	1.46714	0.00011	1.88685	0.00011	0.282588	2.7e-05	0.000911	2.5e-05	0.969082	0.955568	1222.68
P89645 - 9	990	20	1.46722	0.00013	1.88686	0.00011	0.28192	6.3e-05	0.001133	9.2e-05	-9.19068	2.23279	2356.77
P89645 - 10	494	13	1.4672	0.00013	1.88682	0.00011	0.282377	3e-05	0.0003258	9.1e-06	-3.52929	1.06205	1608.11
P89645 - 11	406	12	1.46733	0.00013	1.88678	0.00011	0.282485	3.3e-05	0.00138	0.00024	-1.94117	1.16802	1438.14
P89645 - 12	498	23	1.46721	0.00013	1.88691	0.00011	0.28246	2.8e-05	0.000955	8.7e-05	-0.710249	0.991252	1433.31
P89645 - 13	422	24	1.46708	9.6e-05	1.88676	0.00011	0.28205	0.0001	0.000512	7.6e-05	-16.7521	3.53958	2377.85
P89645 - 14	352.8	6.9	1.46729	0.00014	1.88696	0.00014	0.282704	3.1e-05	0.000551	4.1e-05	4.86281	1.0971	964.675
P89645 - 15	677	27	1.46728	0.00011	1.8868	9.4e-05	0.282397	3.1e-05	0.001269	7.2e-05	0.823214	1.0979	1478.04
P89645 - 16	365.9	4	1.46713	0.00012	1.8869	0.0001	0.282503	2.2e-05	0.00314	0.00028	-2.59081	0.77861	1447.32
P89645 - 17	903	11	1.46729	0.00011	1.88688	0.00011	0.282092	4.3e-05	0.001101	6.9e-06	-4.97688	1.52367	2023.27
P89645 - 18	371.3	8.7	1.46713	0.00013	1.88681	0.0001	0.282512	3.2e-05	0.00201	0.00016	-1.88468	1.13254	1407.04
P89645 - 19	362.5	4.4	1.46729	0.00012	1.88677	0.00011	0.282494	2.6e-05	0.001185	2.8e-05	-2.50836	0.920169	1439.42
P89645 - 20	396	15	1.46717	0.00013	1.88668	0.00012	0.282417	2.6e-05	0.000634	1.5e-05	-4.36648	0.920238	1583.1
P89645 - 21	571	20	1.4672	0.0001	1.88675	0.00012	0.282459	3e-05	0.00077	7e-05	0.915595	1.06223	1388.25
P89645 - 22	398	11	1.46722	0.00013	1.88681	0.00011	0.2825	2.5e-05	0.00062	0.00011	-1.38122	0.884848	1396.43
P89645 - 23	376.3	7.6	1.4673	0.00014	1.88693	0.00011	0.28273	2.1e-05	0.000825	6.2e-05	6.23158	0.743236	896.123
P89645 - 24	409	14	1.46723	0.00011	1.88682	9.9e-05	0.282441	2.8e-05	0.000962	2.1e-05	-3.32078	0.991054	1527.55
P89645 - 25	397	10	1.46718	0.00011	1.88686	0.0001	0.282535	2.7e-05	0.0033	0.00061	-0.870063	0.955634	1363.33
P70787
P70787 - 1	370.2	4.1	1.46719	9.1e-05	1.88684	8.5e-05	0.282492	2.7e-05	0.001178	7.9e-05	-2.41141	0.955576	1439.41
P70787 - 2	355.4	3	1.46722	0.00014	1.88689	9.4e-05	0.282507	2.2e-05	0.002657	8.1e-05	-2.54814	0.778592	1436.3
P70787 - 3	351.2	4.7	1.46735	0.00013	1.88679	6.7e-05	0.282501	2.5e-05	0.000692	2.4e-05	-2.38942	0.884755	1422.95
P70787 - 4	359.8	7.6	1.46729	0.00012	1.88686	9.6e-05	0.282527	2.6e-05	0.00104	1.2e-05	-1.36407	0.920163	1365.04
P70787 - 5	372.8	6.9	1.46707	0.00016	1.88683	7.7e-05	0.282563	3.3e-05	0.00199	0.00031	-0.0432277	1.16793	1291.85
P70787 - 6	369.1	4.9	1.46706	0.0001	1.8869	0.0001	0.282514	2.2e-05	0.001396	5.2e-05	-1.70987	0.778616	1394.26
P70787 - 7	368.8	4.3	1.46719	0.00011	1.88678	0.0001	0.282497	2.1e-05	0.00058	0.0001	-2.11841	0.743224	1419.81
P70787 - 8	365.8	8.3	1.4672	0.00015	1.88697	9.8e-05	0.282512	3e-05	0.001036	2.7e-05	-1.76403	1.06174	1395.06
P70787 - 9	374.8	6.2	1.46717	0.00013	1.88684	0.0001	0.282529	2.5e-05	0.001018	1.1e-05	-0.962926	0.884802	1351.59
P70787 - 10	376.8	8.2	1.46718	0.00013	1.88692	9.9e-05	0.282544	3e-05	0.00129	0.00012	-0.456646	1.06177	1321.17
P70787 - 11	343.9	4.1	1.46708	0.0001	1.88681	8.9e-05	0.28248	2.1e-05	0.003603	9.1e-05	-3.9559	0.743182	1515.9
P70787 - 12	363.5	3.9	1.46726	8.6e-05	1.88683	0.00011	0.282525	2.4e-05	0.00193	0.00011	-1.56922	0.849389	1380.93
P70787 - 13	373.8	8.4	1.46724	0.00015	1.88689	0.00011	0.282455	2.5e-05	0.001296	9e-05	-3.67252	0.8848	1521.78
P70787 - 14	383.7	6.2	1.46721	0.00011	1.88703	9.7e-05	0.282536	2e-05	0.001064	4.9e-05	-0.533925	0.707856	1331.53
P70787 - 15	362.7	3.7	1.46717	0.00011	1.88692	0.00011	0.282475	2.8e-05	0.001754	6.8e-05	-3.3133	0.990952	1490.34
P70787 - 16	357.3	3.9	1.46734	0.00019	1.88679	8.5e-05	0.282564	2.9e-05	0.001378	4.5e-05	-0.188818	1.02633	1288.76
P70787 - 17	351.5	3.6	1.46727	9.8e-05	1.88684	0.0001	0.282535	1.8e-05	0.002991	7.3e-05	-1.71528	0.637024	1380.64
P70787 - 18	366.3	6.4	1.46705	0.00013	1.88674	0.00011	0.282557	2.6e-05	0.00191	0.00015	-0.372849	0.920177	1307.54
P70787 - 19	358.5	5.1	1.46713	0.00012	1.88683	9.6e-05	0.282471	2.3e-05	0.000726	2.2e-05	-3.29948	0.813988	1486.13
P70787 - 20	371.9	5.7	1.46713	0.00012	1.88688	0.00012	0.282516	2.6e-05	0.000734	1.9e-05	-1.41585	0.920188	1377.91
P70787 - 21	363.8	3.2	1.46716	0.00012	1.88679	0.0001	0.282496	1.9e-05	0.001804	7.6e-05	-2.55885	0.672433	1443.64
P70787 - 22	369.2	4.9	1.46713	0.00012	1.88681	9e-05	0.282486	2.2e-05	0.001028	1e-05	-2.6086	0.778616	1451.06
P70787 - 23	384	10	1.46724	0.00013	1.88688	9.7e-05	0.282548	2.7e-05	0.000632	1.7e-05	0.00729465	0.955606	1297.53
P70787 - 24	383.1	6.8	1.46716	0.00013	1.88682	8.6e-05	0.282432	3e-05	0.00255	0.00014	-4.60528	1.06178	1587.89
P70787 - 25	374.3	6.8	1.46725	0.00012	1.88684	7.9e-05	0.282511	2.7e-05	0.00071	3.7e-05	-1.53438	0.955585	1387.3
P89631
P89631 - 1	347.1	9.6	1.46712	0.00012	1.88687	9.6e-05	0.282397	2.7e-05	0.000564	1.7e-05	-6.13023	0.955527	1655.2
P89631 - 2	342.8	7.6	1.46711	0.00012	1.88698	9.1e-05	0.282397	2.9e-05	0.000648	2.1e-05	-6.24372	1.0263	1658.92
P89631 - 3	351.5	6.3	1.46713	0.00014	1.88687	0.00011	0.282378	3e-05	0.0007974	9.1e-06	-6.76042	1.06171	1698.27
P89631 - 4	356	8.1	1.46693	9.5e-05	1.88702	0.0001	0.282431	2.4e-05	0.000423	1.3e-05	-4.69824	0.849374	1572.24
P89631 - 5	353.6	6	1.46719	0.00012	1.88693	0.00014	0.282382	2.3e-05	0.0006562	4.9e-06	-6.53997	0.813979	1686.09
P89631 - 6	357.5	8.5	1.46726	0.00013	1.88699	0.00012	0.282379	3.4e-05	0.000708	2.6e-05	-6.57302	1.20328	1691.27
P89631 - 7	356.9	8.3	1.46722	9e-05	1.88682	0.0001	0.282392	2.8e-05	0.00062	2.9e-06	-6.10524	0.990939	1661.41
P89631 - 8	357	11	1.46712	0.0001	1.88675	0.00011	0.282384	2.8e-05	0.0003173	3e-06	-6.31453	0.990939	1674.64
P89631 - 9	365	13	1.46708	0.00011	1.8869	8.9e-05	0.2824	3e-05	0.000668	1.9e-05	-5.65613	1.06174	1639.62
P89631 - 10	358.1	6.9	1.4672	0.00014	1.88678	9.8e-05	0.282379	2.5e-05	0.00095	6.8e-05	-6.61735	0.884769	1694.53
P89631 - 11	354.8	7.7	1.46722	0.00012	1.88671	0.00011	0.282404	2.8e-05	0.0006287	7.8e-06	-5.72864	0.990934	1636.08
P89631 - 12	351.4	9.5	1.46725	0.00011	1.88691	0.00011	0.282377	2.5e-05	0.000546	1.6e-05	-6.73942	0.884756	1696.87
P89631 - 13	351.9	8	1.46719	0.00013	1.88684	0.0001	0.282367	2.5e-05	0.001224	2.2e-05	-7.24051	0.884757	1728.71
P89631 - 14	346.5	5.6	1.46727	0.00013	1.88688	0.0001	0.282387	2.2e-05	0.001259	3.5e-05	-6.65693	0.778577	1687.8
P89631 - 15	353.5	5.8	1.46723	0.00011	1.88696	0.0001	0.282392	2e-05	0.000524	1.4e-05	-6.15728	0.707808	1661.98
P89631 - 16	344	12	1.46715	0.0001	1.88668	0.00011	0.282378	2.2e-05	0.000757	7e-05	-6.9147	0.778572	1701.99
P89631 - 17	352.5	8.4	1.46723	0.00014	1.88684	0.0001	0.282383	3.2e-05	0.001032	3.8e-05	-6.61648	1.13249	1690.02
P89631 - 18	343	13	1.46718	0.00013	1.88692	0.00013	0.282388	2.6e-05	0.000537	2.7e-05	-6.53261	0.920129	1677.22
P89631 - 19	350.6	7.1	1.46711	0.00013	1.88683	0.00013	0.282396	3.2e-05	0.00079	2.4e-05	-6.14129	1.13249	1658.67
P89631 - 20	343.5	6.8	1.46716	9.4e-05	1.88679	9.5e-05	0.282394	2.1e-05	0.001136	5.9e-05	-6.44567	0.743182	1672.15
P89631 - 21	354.4	8.5	1.46709	0.00011	1.8868	0.00012	0.282402	2.5e-05	0.0005413	4.5e-06	-5.78765	0.884762	1639.47
P89631 - 22	348.6	7.8	1.46723	0.00013	1.88701	0.0001	0.282382	2.3e-05	0.00099	1.6e-05	-6.72658	0.81397	1693.84
P73926
P73926 - 1	485.8	8.8	1.46716	0.00014	1.88683	0.00012	0.28279	2.9e-05	0.001892	2.8e-05	10.4042	1.02663	716.186
P73926 - 2	480.5	6.9	1.46718	0.00017	1.88687	0.0001	0.282803	3e-05	0.002025	4.5e-05	10.7098	1.06201	692.407
P73926 - 3	513	7.1	1.46712	0.00013	1.88674	9.5e-05	0.282824	2.4e-05	0.001855	5.5e-05	12.1965	0.849673	622.743
P73926 - 4	487.5	8.4	1.46714	0.00014	1.8868	0.00014	0.282826	3.1e-05	0.002003	6.1e-05	11.6787	1.09743	635.806
P73926 - 5	466.8	8.2	1.46712	0.00014	1.88677	0.00012	0.282818	2.5e-05	0.001624	1.5e-05	11.0762	0.884984	658.067
P73926 - 6	486.8	6.9	1.46719	0.00012	1.8868	0.00011	0.282813	2.7e-05	0.002057	2.6e-05	11.1862	0.955826	666.843
P73926 - 7	488.8	7.8	1.46723	0.00014	1.88689	0.00012	0.282798	2.5e-05	0.0022307	8.2e-06	10.641	0.885028	703.385
P73926 - 8	490.2	6.4	1.46725	0.00012	1.88674	0.00011	0.282837	2.6e-05	0.001765	3.5e-05	12.2025	0.920432	604.315
P73926 - 9	481.8	6.7	1.46716	0.00012	1.88691	0.00012	0.282811	2.3e-05	0.002429	5.6e-05	10.8911	0.814213	681.809
P73926 - 10	484.2	7.5	1.46725	0.00012	1.88686	0.0001	0.282788	2.8e-05	0.002123	1.4e-05	10.2252	0.991221	726.383
P73926 - 11	488	10	1.46718	0.00013	1.88694	0.00014	0.282809	2.8e-05	0.001587	3.8e-05	11.2222	0.991229	665.487
P73926 - 12	481.2	7.6	1.46716	0.00012	1.88688	0.00011	0.282788	3.6e-05	0.002216	7e-05	10.1325	1.27442	729.95
P73926 - 13	475.9	8.1	1.46714	0.00012	1.88688	0.0001	0.282793	2.7e-05	0.001562	2.5e-05	10.4051	0.955803	708.292
P73926 - 14	515	11	1.4671	0.00013	1.8868	0.00011	0.282826	2.5e-05	0.000984	6.1e-05	12.6077	0.88508	597.917
P73926 - 15	488.7	9	1.46716	0.00014	1.88686	9.4e-05	0.282804	3.2e-05	0.001964	1.5e-05	10.9378	1.13284	684.277
P73926 - 16	482.4	9.5	1.46718	8.8e-05	1.88681	0.0001	0.282794	2.4e-05	0.002256	4.7e-05	10.3572	0.849615	716.503
P73926 - 17	479.9	6	1.46715	0.00011	1.88683	0.00012	0.282826	2.8e-05	0.002187	8.1e-05	11.4597	0.991211	643.841
P73926 - 18	482.4	6.5	1.4671	0.00015	1.88684	0.00012	0.282818	3e-05	0.0019048	9.7e-06	11.3193	1.06202	654.826
P73926 - 19	487.4	6.7	1.46715	0.00019	1.88687	0.0001	0.282789	2.8e-05	0.002302	5.9e-05	10.27	0.991228	726.051
P73926 - 20	458.1	8.4	1.46701	0.00019	1.88697	0.00013	0.282807	2.9e-05	0.00251	0.00013	10.2318	1.02656	705.301
P73926 - 21	516.2	7.8	1.46729	0.00011	1.88688	0.0001	0.28281	2.1e-05	0.002371	8.5e-05	11.5919	0.743469	664.09
P73926 - 22	480	8	1.46711	0.00012	1.88694	9.6e-05	0.282806	3e-05	0.001522	7.5e-05	10.9657	1.06201	675.603
P73926 - 23	483.9	8	1.46719	0.00011	1.88692	0.00011	0.282784	3e-05	0.001902	1.1e-05	10.1483	1.06202	731.072
P73926 - 24	492	8.5	1.46729	0.00011	1.88691	0.00011	0.282821	2.7e-05	0.002004	4.2e-05	11.5963	0.955837	644.653
P73926 - 25	493.9	6.8	1.46718	0.00014	1.88687	9.3e-05	0.282795	2.4e-05	0.0021	2e-05	10.6845	0.849637	704.634
P73926 - 26	487	8.8	1.46712	0.00014	1.88675	0.00011	0.282821	3.6e-05	0.002251	3.3e-05	11.4109	1.27444	652.589
P73926 - 27	487.9	6.9	1.46714	0.00011	1.88678	0.00013	0.282815	2.7e-05	0.002309	8.7e-05	11.1986	0.955828	666.923
P73926 - 28	481.6	6.6	1.46719	0.00015	1.88681	0.00011	0.282818	2.3e-05	0.002032	3.7e-05	11.2617	0.814213	657.887
P73926 - 29	486	10	1.46711	0.00012	1.88681	0.00011	0.282816	2.6e-05	0.001485	2.3e-05	11.4602	0.920423	648.64
P73926 - 30	499	10	1.46711	9.9e-05	1.88701	0.00013	0.282808	3.1e-05	0.001653	2.3e-05	11.4001	1.09746	662.781
P76687
P76687 - 1	117.2	1.8	1.46725	0.00011	1.88684	8e-05	0.282773	2.4e-05	6.87e-05	3e-06	2.17363	0.848922	948.562
P76687 - 2	326.8	3.6	1.46718	0.00012	1.8868	0.0001	0.282687	2.2e-05	0.001817	6.5e-05	3.4154	0.778542	1036.09
P76687 - 3	115.5	1.3	1.46717	8.8e-05	1.88682	7.6e-05	0.282764	1.9e-05	5.344e-05	1.4e-07	1.81872	0.672061	969.713
P76687 - 4	248.6	4	1.46728	0.00012	1.8869	8.8e-05	0.282676	2.2e-05	0.001673	6.8e-05	1.39863	0.778406	1102.01
P76687 - 5	312.8	3.3	1.46717	0.00012	1.88684	8.2e-05	0.282694	2.3e-05	0.0020361	6.5e-06	3.32186	0.813905	1030.93
P76687 - 6	303.8	5	1.4672	0.00011	1.88676	0.00012	0.28268	2.7e-05	0.00303	0.00019	2.43756	0.955435	1079.93
P76687 - 7	123.4	4.6	1.46717	0.00012	1.8868	8.8e-05	0.282782	2.1e-05	7.7e-05	1.5e-05	2.62893	0.742817	924.606
P76687 - 8	289.4	5.6	1.46719	0.00014	1.88685	0.0001	0.282698	3.2e-05	0.001946	2.5e-05	2.9898	1.13233	1033.45
P76687 - 9	118.1	1.7	1.46723	0.00012	1.88682	8.8e-05	0.282782	3.1e-05	0.0003368	7.6e-06	2.49102	1.09653	929.147
P76687 - 10	278.1	4.2	1.46719	0.00016	1.88672	0.00013	0.282665	2.7e-05	0.00369	0.00012	1.26324	0.95538	1134
P76687 - 11	320.8	6.7	1.46718	0.00012	1.88688	0.0001	0.282684	2.4e-05	0.00194	2.8e-05	3.15629	0.849308	1047.79
P76687 - 12	307.1	5.5	1.46728	0.00014	1.88678	0.00011	0.282709	2.4e-05	0.001829	7e-05	3.7752	0.849282	997.603
P76687 - 13	283.7	4.5	1.46703	0.00012	1.88678	9.5e-05	0.282696	3.2e-05	0.001603	7.9e-05	2.86361	1.13232	1036.94
P76687 - 14	320.5	6.3	1.46708	0.00016	1.88695	0.0001	0.282684	3e-05	0.00149	0.00017	3.24555	1.06163	1041.88
P76687 - 15	191.9	4.8	1.46716	0.00012	1.88684	9.4e-05	0.282749	1.5e-05	0.000438	4e-05	2.93723	0.530665	959.424
P76687 - 16	145.3	1.7	1.4671	0.00011	1.8867	0.00013	0.282699	2.3e-05	0.00336	0.0002	-0.136368	0.813601	1117.16
P76687 - 17	116.4	1.7	1.46721	0.00011	1.88681	7.7e-05	0.282785	2.4e-05	6.25e-05	2.8e-06	2.58081	0.848921	922.101
P76687 - 18	251.3	7.6	1.46708	0.00022	1.88689	0.00011	0.282698	3e-05	0.00147	0.00012	2.26804	1.06147	1049.03
P76687 - 19	229.2	6.6	1.46717	0.00011	1.88692	8.9e-05	0.282739	2.4e-05	0.001192	8.5e-05	3.28956	0.849134	966.657
P76687 - 20	268.8	5.4	1.46689	0.00018	1.88687	9.8e-05	0.28267	2.6e-05	0.00233	0.00012	1.49754	0.919976	1111.77
P89649
P89649 - 1	123.9	7	1.46713	0.00011	1.88685	0.00011	0.282711	2.6e-05	0.000812	1.7e-05	0.0683895	0.919679	1087.21
P89649 - 2	141.8	5.3	1.46717	0.00014	1.88681	0.00012	0.282689	2.3e-05	0.001103	1.4e-05	-0.348546	0.813595	1127.8
P89649 - 3	125.5	2.4	1.46723	0.00011	1.88677	9.9e-05	0.282708	2.3e-05	0.002016	4.5e-05	-0.102907	0.813566	1099.32
P89649 - 4	121.8	3.6	1.46719	0.00013	1.88675	8.3e-05	0.282684	2.7e-05	0.001268	4.5e-05	-0.968955	0.955047	1151.12
P89649 - 5	128.8	3.3	1.46709	0.00011	1.88682	8.2e-05	0.282695	2.2e-05	0.00139	0.0001	-0.440444	0.778199	1123.28
P89649 - 6	122.8	2.3	1.46724	0.00014	1.88681	9.1e-05	0.282697	2.8e-05	0.0015919	7.2e-06	-0.514015	0.990422	1123.17
P89649 - 7	125.3	2.7	1.4673	0.00012	1.88679	8.6e-05	0.282689	3e-05	0.002473	3.7e-05	-0.817024	1.06117	1144.3
P89649 - 8	130.4	4.3	1.46711	0.00012	1.88685	8.9e-05	0.282694	2e-05	0.001285	3.4e-05	-0.432648	0.707456	1124.06
P89649 - 9	120.7	2.4	1.46725	0.00011	1.88691	0.0001	0.282712	3.5e-05	0.001575	6.2e-05	-0.0265743	1.23802	1090.68
P89649 - 10	124.5	2.2	1.46698	0.00016	1.88689	9.3e-05	0.282667	1.9e-05	0.00195	0.00013	-1.56865	0.672074	1191.14
P89649 - 11	118.9	1.3	1.46712	0.00015	1.88679	9.1e-05	0.282692	2.3e-05	0.002777	6.7e-05	-0.866653	0.813554	1142.36
P89649 - 12	121.4	1.8	1.4672	0.00011	1.88676	0.00011	0.282684	2.6e-05	0.002427	2e-05	-1.07054	0.919674	1157.22
P89649 - 13	128.4	1.6	1.46737	0.00018	1.88687	7.3e-05	0.282611	2.9e-05	0.002587	6.9e-05	-3.5219	1.02581	1317.41
P89649 - 14	120.8	3.9	1.46727	0.00015	1.88684	0.00011	0.282682	2.3e-05	0.001443	5.1e-05	-1.07507	0.813557	1157.03
P89649 - 15	122.8	1.8	1.46715	0.00013	1.88684	0.00012	0.282693	2.4e-05	0.001935	1.5e-05	-0.68336	0.848933	1133.87
P89649 - 16	126.2	3.6	1.46711	0.00016	1.88685	9.7e-05	0.282709	2.6e-05	0.0027	7.7e-05	-0.109973	0.919684	1100.32
P89649 - 17	120.4	1.3	1.46727	0.00015	1.88679	0.00013	0.282671	2.6e-05	0.002903	6.2e-05	-1.5889	0.919672	1189.16
P89649 - 18	120	1.6	1.46712	0.00014	1.88696	0.00012	0.282685	3.2e-05	0.003172	4.2e-05	-1.12316	1.1319	1159.43
P89649 - 19	121.8	1.8	1.4672	0.00014	1.88681	0.0001	0.282669	2.8e-05	0.00331	0.00012	-1.66397	0.990419	1195.01
P89649 - 20	119.6	2.1	1.46719	0.00011	1.88691	0.00012	0.282673	2.2e-05	0.001818	5.6e-05	-1.44861	0.778183	1179.67
P70659
P70659 - 1	357.7	4	1.46717	0.00018	1.88694	8.7e-05	0.282445	2.6e-05	0.001797	3.4e-05	-4.4911	0.920159	1560.55
P70659 - 2	344.3	9.4	1.46725	0.00019	1.8869	0.0001	0.28244	2.9e-05	0.000802	2.3e-05	-4.72426	1.0263	1564.59
P70659 - 3	361.4	9.9	1.46702	0.00013	1.88682	0.0001	0.282489	2.6e-05	0.001127	4e-05	-2.69513	0.920167	1450.33
P70659 - 4	354.5	4.4	1.46721	0.00018	1.88683	6.7e-05	0.282422	2.1e-05	0.001873	1.3e-05	-5.3906	0.7432	1614.59
P70659 - 5	343.5	4.4	1.46725	0.00016	1.88681	8.9e-05	0.282464	3e-05	0.001435	1.4e-05	-4.03648	1.06169	1520.66
P70659 - 6	361	7.9	1.46718	0.00012	1.88695	9.8e-05	0.282453	2.9e-05	0.000899	2.1e-05	-3.92327	1.02634	1527.42
P70659 - 7	354.3	6.6	1.46721	0.00018	1.88684	0.00012	0.282454	3.5e-05	0.001376	2.7e-05	-4.14559	1.23867	1536.1
P70659 - 8	352.7	6.1	1.46711	0.00016	1.887	0.00014	0.282404	2.6e-05	0.001553	9.7e-05	-5.99077	0.920149	1650.89
P70659 - 9	350.6	4.5	1.46717	0.00013	1.8869	7.3e-05	0.282445	2.9e-05	0.0014213	3.2e-06	-4.5539	1.02631	1558.87
P70659 - 10	360.2	5.7	1.46715	0.00016	1.88687	7.7e-05	0.282437	2.9e-05	0.001434	3.1e-05	-4.63468	1.02634	1571.57
P70659 - 11	357	6.5	1.46711	0.00015	1.88692	9.2e-05	0.282507	2.3e-05	0.001498	4.2e-05	-2.24092	0.813986	1418.18
P70659 - 12	349.4	6.2	1.46715	0.00012	1.88691	0.0001	0.282446	2.2e-05	0.0014666	4.6e-06	-4.55467	0.778582	1557.96
P70659 - 13	364	8.3	1.46717	0.00012	1.88681	0.0001	0.282453	2.7e-05	0.001007	3.8e-05	-3.8841	0.955563	1527.33
P70659 - 14	346.9	6.8	1.46732	0.00012	1.88679	0.0001	0.282425	2.9e-05	0.00153	0.00011	-5.36584	1.02631	1607
P70659 - 15	345.8	4.9	1.46725	0.00018	1.88693	0.00011	0.282449	3.3e-05	0.0014225	4.8e-06	-4.51529	1.16786	1552.63
P70659 - 16	344.9	6.1	1.46717	0.00014	1.88681	7.5e-05	0.28244	2.1e-05	0.001388	5.4e-05	-4.84516	0.743184	1572.67
P70659 - 17	354.1	6.8	1.46721	0.00014	1.88681	0.00013	0.282464	2.7e-05	0.00136	0.00013	-3.79222	0.955542	1513.69
P70659 - 18	346.7	7	1.46717	0.00017	1.88682	8.9e-05	0.282464	3e-05	0.001125	6.6e-05	-3.89682	1.0617	1514.4
P70659 - 19	345.4	5.8	1.46717	0.00014	1.88673	0.0001	0.282448	2.5e-05	0.001553	2.5e-05	-4.58911	0.884744	1556.95
P70659 - 20	343.9	3.3	1.46711	0.00015	1.88678	0.00011	0.282402	3e-05	0.002767	1.3e-05	-6.52572	1.06169	1677.5
P70659 - 21	352.8	4.8	1.46713	0.00015	1.88696	7e-05	0.282426	2.2e-05	0.0018	0.00015	-5.26782	0.778588	1605.52
P70659 - 22	344.1	3.3	1.46718	0.00014	1.88692	7.2e-05	0.282403	2.6e-05	0.0031	0.00011	-6.56219	0.920131	1679.95
P70659 - 23	346.2	6.9	1.46724	0.00013	1.88688	0.0001	0.282453	2.9e-05	0.001258	4.8e-05	-4.32742	1.0263	1541.12
P73940
P73940 - 1	413	16	1.46716	0.00012	1.88679	0.00012	0.282444	2.5e-05	0.0006703	3.1e-06	-3.04777	0.884878	1513.51
P73940 - 2	353.9	5.7	1.46732	9.9e-05	1.88681	9.8e-05	0.282395	2e-05	0.001661	7.5e-05	-6.30906	0.707809	1671.83
P73940 - 3	348.3	7.2	1.46716	0.00017	1.88689	8.3e-05	0.282461	2.7e-05	0.000888	8.1e-05	-3.91373	0.95553	1516.74
P73940 - 4	359.2	8.5	1.46709	0.00018	1.88687	0.00014	0.28249	3.3e-05	0.000846	1.3e-05	-2.64033	1.1679	1445.13
P73940 - 5	343	5.2	1.46717	0.00012	1.88692	8.4e-05	0.282446	2.2e-05	0.0012737	7.8e-06	-4.64751	0.778571	1558.72
P73940 - 6	350	5	1.46725	0.00011	1.88671	0.0001	0.28239	2.5e-05	0.0015538	8.3e-06	-6.54393	0.884753	1683.48
P73940 - 7	351.1	5.9	1.4672	0.00011	1.8869	9.7e-05	0.282496	2.7e-05	0.001416	4.3e-05	-2.73707	0.955536	1444.8
P73940 - 8	336	4	1.46722	0.00013	1.88685	0.0001	0.282369	1.9e-05	0.001692	7.5e-05	-7.616	0.672391	1739.64
P73940 - 9	345.6	8	1.46713	0.00015	1.88699	8.7e-05	0.282463	2.5e-05	0.000641	1.2e-05	-3.84508	0.884744	1510.27
P73940 - 10	363.2	6.9	1.46717	0.0002	1.88689	0.00011	0.282463	4e-05	0.001216	2.2e-05	-3.59786	1.41565	1508.66
P73940 - 11	354.5	6.8	1.46724	0.00015	1.88682	8.4e-05	0.282436	2.1e-05	0.001054	5.8e-05	-4.70267	0.7432	1571.32
P73940 - 12	357.8	5.4	1.46724	0.00014	1.88686	9.9e-05	0.282376	3.1e-05	0.000757	3.6e-05	-6.68426	1.09711	1698.49
P73940 - 13	356	7.6	1.46715	0.00016	1.88677	7.5e-05	0.28246	3.2e-05	0.001299	2.1e-05	-3.87866	1.1325	1520.64
P73940 - 14	351.5	5.7	1.46726	0.00014	1.88679	8.5e-05	0.282414	2.2e-05	0.001549	3.2e-05	-5.6615	0.778585	1629.24
P73940 - 15	347.8	6.6	1.46717	0.00014	1.88689	9.9e-05	0.28238	3.3e-05	0.00157	0.00014	-6.94842	1.16787	1707.13
P73940 - 16	343.8	5.2	1.46726	0.00011	1.88692	0.00011	0.282453	2.7e-05	0.001779	3.6e-05	-4.49774	0.95552	1549.93
P73940 - 17	339.4	4.9	1.46728	0.00012	1.88686	0.00014	0.282461	2.5e-05	0.001282	1.1e-05	-4.19588	0.884732	1527.44
P73940 - 18	342	6.5	1.46716	0.00013	1.88693	9.4e-05	0.282447	2.2e-05	0.001329	7.3e-05	-4.64614	0.778569	1557.84
P73940 - 19	356.3	7.1	1.46706	0.00014	1.88685	0.00011	0.282458	2.4e-05	0.001427	4.7e-05	-3.97323	0.849375	1526.83
P73940 - 20	340.9	7.2	1.46718	0.00014	1.88679	0.00011	0.282464	2.3e-05	0.000913	3.2e-05	-3.97412	0.813956	1514.67
P73940 - 21	342.7	6.4	1.46718	0.00016	1.88694	0.00012	0.282447	3.4e-05	0.00155	0.00012	-4.68133	1.20324	1560.61
P73940 - 22	326.8	6.2	1.4673	0.00013	1.88689	9.8e-05	0.282421	2.6e-05	0.00155	0.00012	-5.94006	0.920095	1627.14
P75836
P75836 - 1	377.1	3.7	1.4672	0.00011	1.88689	9.1e-05	0.282709	2.9e-05	0.001874	3.6e-05	5.24349	1.02638	959.705
P75836 - 2	387.4	4.8	1.46732	0.00012	1.8869	9e-05	0.282716	3.1e-05	0.001608	7.6e-05	5.77718	1.09719	933.878
P75836 - 3	472.1	5.1	1.46721	0.00012	1.88688	0.00012	0.282693	2.9e-05	0.00218	0.00014	6.59014	1.02659	949.161
P75836 - 4	490.8	8.5	1.46712	0.00016	1.88695	0.00015	0.28271	2.9e-05	0.00211	0.00031	7.6069	1.02664	899.08
P75836 - 5	420	5.2	1.46717	0.00017	1.88681	9.9e-05	0.28269	2.8e-05	0.00211	5.5e-05	5.41187	0.991079	982.983
P75836 - 6	366.7	6.6	1.46715	0.00014	1.88691	0.0001	0.282708	2.6e-05	0.0011254	6.2e-06	5.17045	0.920178	956.112
P75836 - 7	453.2	4.1	1.46716	0.00012	1.88701	0.00011	0.282647	2.7e-05	0.002237	3.5e-05	4.54853	0.955754	1064.25
P75836 - 8	486.9	7.9	1.46716	0.00016	1.88677	9.9e-05	0.282709	2.9e-05	0.00193	9.7e-05	7.54771	1.02663	899.771
P75836 - 9	511.6	8.3	1.46717	0.0002	1.88683	8.5e-05	0.282703	2.9e-05	0.00199	0.00018	7.83721	1.02668	900.839
P75836 - 10	416.4	4.6	1.46721	0.00014	1.88688	6.9e-05	0.282676	2.7e-05	0.001801	6e-05	4.92615	0.955675	1011.05
P75836 - 11	448.9	4.6	1.46715	0.00013	1.88678	9.6e-05	0.282655	2.2e-05	0.00511	0.00029	3.88588	0.778755	1102.98
P75836 - 12	476.8	5.8	1.46715	0.00013	1.88688	0.00012	0.282709	3.1e-05	0.00201	0.00017	7.30889	1.09741	907.02
P75836 - 13	424	10	1.46702	0.00017	1.8869	0.0001	0.282728	3e-05	0.001135	5.1e-05	7.11514	1.06188	877.565
P75836 - 14	466.8	6.3	1.46725	0.00015	1.88689	0.00015	0.282675	3.4e-05	0.001738	4.8e-05	5.97881	1.20358	983.941
P75836 - 15	448.8	6.2	1.46711	0.00016	1.88672	0.00015	0.282714	2.7e-05	0.001462	9.2e-05	7.05901	0.955745	900.792
P75836 - 16	458.7	8.2	1.46722	0.00015	1.88691	0.0001	0.2827	3.7e-05	0.0007	1e-05	7.00764	1.30975	911.912
P75836 - 17	463.4	3.9	1.46713	0.00016	1.88682	6.7e-05	0.282687	2.1e-05	0.002923	6.1e-05	5.96684	0.743381	982.01
P75836 - 18	476	13	1.46721	0.00019	1.8869	0.00017	0.282687	3.4e-05	0.00168	0.00013	6.61751	1.2036	950.505
P75836 - 19	469.2	4.5	1.4672	0.00014	1.88679	0.00011	0.282648	2.8e-05	0.002583	6.6e-05	4.81085	0.991188	1060.23
P75836 - 20	457	8	1.4673	0.00014	1.88684	0.00013	0.282674	2.8e-05	0.000798	3.1e-05	6.02025	0.991161	973.536
P75836 - 21	455.2	7.8	1.46722	0.00013	1.88688	0.00015	0.282675	3e-05	0.00193	0.0003	5.67427	1.06195	994.158
P75836 - 22	456.2	7.5	1.46718	0.0002	1.8869	0.00014	0.282684	3.2e-05	0.001625	8.8e-05	6.10633	1.13275	967.416
P75836 - 23	493.2	8.2	1.46724	0.00018	1.88678	0.00012	0.282689	3.3e-05	0.001452	9.8e-05	7.1294	1.16825	931.465
P75836 - 24	298.1	5	1.46708	0.00015	1.88697	9e-05	0.282672	3.1e-05	0.00329	0.00018	1.98733	1.09697	1103.97
P75836 - 25	464.6	7.6	1.46722	0.00012	1.88684	0.00013	0.28273	2.8e-05	0.001838	7.9e-05	7.84816	0.991178	862.923
P75836 - 26	474.2	7.1	1.46728	0.00012	1.88688	0.00012	0.282668	1.9e-05	0.001328	3.6e-05	6.01738	0.672599	987.344
P75836 - 27	476	10	1.46724	0.00014	1.887	0.00013	0.282671	3.1e-05	0.001101	1.7e-05	6.23407	1.0974	974.956
P75836 - 28	454.2	6.1	1.46724	0.00014	1.88696	0.00013	0.282682	3.3e-05	0.001825	4.1e-05	5.93259	1.16815	976.905
P75836 - 29	495	11	1.46729	0.00015	1.88691	0.00014	0.282695	3.1e-05	0.001175	5.2e-05	7.47149	1.09745	911.052
P75836 - 30	478.7	8.3	1.46728	0.00013	1.8869	0.00013	0.282693	2.1e-05	0.001616	5.3e-05	6.90776	0.743407	934.126
OU84922b
OU84922b - 1	293.4	6.9	1.46726	0.00013	1.88683	0.00012	0.28273	2.8e-05	0.0014198	2.1e-06	4.30855	0.990798	952.832
OU84922b - 2	295.3	4.9	1.46728	0.00015	1.88677	9.2e-05	0.282725	3.5e-05	0.0010188	6.3e-06	4.2507	1.2385	958.018
OU84922b - 3	278.3	4.8	1.46713	0.00015	1.88694	0.00012	0.282695	3.4e-05	0.0010272	2.2e-06	2.81958	1.20307	1035.45
OU84922b - 4	306.7	4.1	1.46719	0.00014	1.88678	0.00012	0.282732	4.3e-05	0.001449	1.6e-05	4.65787	1.52163	941.162
OU84922b - 5	303.8	4.7	1.46725	0.00017	1.88691	0.00012	0.282718	4e-05	0.0012534	3.5e-06	4.13984	1.41546	971.807
OU84922b - 6	314.2	6	1.46714	0.00017	1.88683	0.00015	0.282763	4.5e-05	0.00201	2.9e-05	5.79839	1.59243	874.501
OU84922b - 7	306.1	6	1.46716	0.00016	1.88686	0.00011	0.282664	3.4e-05	0.002078	1.3e-05	2.11118	1.20315	1102.46
OU84922b - 8	303.2	5.6	1.46721	0.00011	1.88697	0.0001	0.282709	4e-05	0.001573	3e-05	3.74426	1.41546	996.476
OU84922b - 9	312.3	6.3	1.4673	0.00013	1.88699	0.00013	0.282707	4.7e-05	0.001632	2.7e-05	3.85502	1.6632	996.655
OU84922b - 10	301.6	5.4	1.46724	0.00018	1.88688	0.00011	0.28272	3.6e-05	0.0011947	8.1e-06	4.17504	1.27391	967.825
OU84922b - 11	304.7	5.2	1.46727	0.00013	1.88687	9.8e-05	0.282748	3.7e-05	0.001534	5.9e-05	5.16414	1.3093	907.358
OU84922b - 12	310.3	5.9	1.46711	0.00015	1.887	0.00012	0.282698	3.8e-05	0.001131	1.7e-05	3.59704	1.34471	1011.46
OU84922b - 13	307.3	5.3	1.46717	0.00014	1.88684	0.00012	0.282707	3.5e-05	0.0014465	7.5e-06	3.78653	1.23854	997.042
OU49115
OU49115 - 1	354	10	1.46724	0.00014	1.88687	0.00013	0.282791	3.7e-05	0.0005917	3.8e-06	7.95861	1.30945	768.25
OU49115 - 2	360.5	8.9	1.46718	0.00014	1.88686	0.00014	0.282825	4.7e-05	0.00078	2.7e-05	9.25973	1.66337	690.228
OU49115 - 3	357.2	8.5	1.46726	0.00016	1.88694	0.00013	0.282814	5.1e-05	0.00069	1.4e-05	8.81963	1.80493	715.761
OU49115 - 4	362	12	1.46719	0.00014	1.88692	0.00012	0.282885	6.2e-05	0.001161	2.1e-05	11.3245	2.19425	559.16
OU49115 - 5	359.4	8.2	1.46719	0.00011	1.88674	0.00011	0.282824	3.6e-05	0.00084	1.4e-05	9.18601	1.27407	694.073
OU49115 - 6	361.1	8.4	1.46711	0.00011	1.88684	0.00011	0.282799	3.8e-05	0.000502	2.1e-05	8.41923	1.34486	744.446
OU49115 - 7	356.5	6.3	1.4671	0.00011	1.88683	0.00013	0.282834	3.8e-05	0.000438	2.6e-06	9.57167	1.34484	667.1
OU49115 - 8	360.5	8.7	1.46706	0.00011	1.8868	0.00011	0.282827	3.7e-05	0.000945	3.7e-05	9.29108	1.30947	688.223
OU49115 - 9	362.5	4.3	1.46712	0.00012	1.88695	0.00014	0.28281	4.9e-05	0.0007109	5.1e-06	8.78918	1.73416	721.907
OU49115 - 10	363.3	6.5	1.46705	0.0001	1.88684	0.00011	0.282784	4.7e-05	0.0013	4.1e-05	7.74463	1.66339	789.286
OU49115 - 11	362.2	7.3	1.46712	0.00012	1.88681	0.00011	0.282825	3.3e-05	0.000704	2.5e-05	9.31513	1.16791	688.031
OU49115 - 12	361.2	4.8	1.46711	0.00012	1.88678	0.00012	0.282783	4.8e-05	0.000968	8.5e-05	7.74359	1.69877	787.688
OU49115 - 13	362.6	6.1	1.46712	0.00011	1.88693	9.4e-05	0.282837	4.6e-05	0.001873	4.7e-05	9.46756	1.62799	678.595
OU49115 - 14	350.6	5.1	1.46716	0.00011	1.88686	0.00015	0.28281	4e-05	0.000654	1.1e-05	8.54184	1.41561	728.29
OU49115 - 15	360.8	7.1	1.46712	0.00011	1.88693	0.00015	0.282819	4.9e-05	0.001611	9.5e-05	8.85516	1.73416	716.341
OU49115 - 16	358.3	5.2	1.46711	8.7e-05	1.88671	0.00013	0.282773	3.8e-05	0.000664	5e-05	7.39889	1.34485	807.397
OU49115 - 17	364.7	6.6	1.46711	9.8e-05	1.88691	0.00014	0.28278	4.3e-05	0.001121	4e-05	7.67646	1.52183	794.749
OU49115 - 18	364.8	6.3	1.46707	0.0001	1.88682	0.00015	0.282824	4.2e-05	0.000705	1.4e-05	9.33645	1.48643	688.727
OU49115 - 19	379.8	8.3	1.46708	0.00011	1.88676	0.00012	0.282845	3.6e-05	0.000719	3.2e-05	10.4048	1.27413	632.212
OU49115 - 20	356.9	7.3	1.46711	9.7e-05	1.88687	0.00014	0.282791	2.8e-05	0.000537	1e-05	8.03528	0.990939	765.651
P45423
P45423 - 1	367.2	5.4	1.46717	7e-05	1.88679	0.0001	0.282681	3.5e-05	0.001331	6.1e-05	4.17564	1.2387	1019.8
P45423 - 2	375.9	6.6	1.46714	0.00011	1.88675	0.00011	0.28261	3.8e-05	0.001008	2.3e-05	1.93018	1.3449	1169.3
P45423 - 3	302.9	9.4	1.46721	0.0001	1.88684	0.0001	0.282661	2.9e-05	0.000511	3.6e-05	2.25246	1.02621	1090.96
P45423 - 4	364.5	6.1	1.46714	8.7e-05	1.8869	0.00011	0.282621	3.7e-05	0.001177	1.5e-05	2.03139	1.30948	1153.84
P45423 - 5	370	5.4	1.46712	0.00011	1.88681	0.00011	0.282648	3.7e-05	0.001037	1.5e-05	3.13998	1.30949	1087.84
P45423 - 6	363.8	5	1.46712	0.00012	1.88662	0.00011	0.282625	4e-05	0.001515	3.2e-05	2.07632	1.41565	1150.43
P45423 - 7	372.4	6	1.46702	0.00014	1.88694	8.7e-05	0.282658	3.1e-05	0.001114	8.5e-05	3.5269	1.09715	1065.16
P45423 - 8	371.7	5.3	1.46711	0.00014	1.8869	0.00014	0.282649	4.7e-05	0.00133	0.0001	3.14	1.66342	1089.19
P45423 - 9	380.3	7.1	1.46709	7.9e-05	1.88689	8.9e-05	0.28261	3.8e-05	0.000948	2.4e-05	2.04076	1.34492	1165.77
P45423 - 10	371	5.4	1.4671	0.00013	1.88684	0.0001	0.282671	3e-05	0.000839	2e-05	4.02437	1.06175	1032.43
P45423 - 11	371.1	6.1	1.4672	0.00011	1.88674	0.0001	0.282625	3.6e-05	0.000819	4.6e-05	2.40345	1.2741	1135.47
P45423 - 12	385.2	7.1	1.46712	0.00013	1.88683	8.5e-05	0.282648	2.9e-05	0.00061	2.4e-05	3.57854	1.02639	1072.03
P45423 - 13	371.6	6.4	1.46721	0.00011	1.8868	0.00012	0.282675	3.4e-05	0.001069	3.2e-05	4.12235	1.20332	1026.68
P45423 - 14	370.3	5.4	1.46713	9.5e-05	1.88679	0.00013	0.28265	3.7e-05	0.001316	3.4e-05	3.14876	1.30949	1087.52
P45423 - 15	365.6	4.9	1.46718	9.2e-05	1.88672	0.00011	0.282662	2.8e-05	0.001148	2.1e-05	3.51319	0.990958	1060.64
P45423 - 16	370.5	6.4	1.46705	0.00013	1.88674	0.00012	0.28266	3.4e-05	0.0008008	3.3e-06	3.63354	1.20332	1056.88
P45423 - 17	375.7	6.5	1.46717	0.00012	1.88664	8.9e-05	0.282635	4e-05	0.001039	1.2e-05	2.80292	1.41569	1113.76
P45423 - 18	376.8	5	1.46702	0.00012	1.88679	0.00012	0.282643	3.8e-05	0.00142	0.00014	3.0147	1.34491	1101.19
P45423 - 19	571	7.2	1.46721	0.0001	1.88688	0.00014	0.28249	3.9e-05	0.000981	2.8e-05	1.93316	1.3809	1323.73
P45423 - 20	390.3	6.8	1.46709	0.00011	1.88679	0.00011	0.282669	3.2e-05	0.000704	2.2e-05	4.40949	1.13259	1023.24
OU85069
OU85069 - 1	349	10	1.46704	0.00013	1.88676	9.4e-05	0.28272	3.2e-05	0.0011193	8e-06	5.21401	1.13248	939.308
OU85069 - 2	334.6	3	1.46707	0.00012	1.88681	8e-05	0.282699	3e-05	0.001812	5.3e-05	4.00605	1.06167	1004.74
OU85069 - 3	343.9	7.3	1.46707	0.00011	1.88678	0.00012	0.282737	3.7e-05	0.0008533	9.7e-06	5.76605	1.30942	900.108
OU85069 - 4	347	3.2	1.46705	0.00012	1.88684	0.0001	0.282712	3.2e-05	0.00211	4.1e-05	4.65978	1.13248	972.995
OU85069 - 5	334.3	3.7	1.46721	9.6e-05	1.88688	9.1e-05	0.282699	3.6e-05	0.001233	5.6e-06	4.12799	1.274	996.748
OU85069 - 6	349.2	4	1.4672	0.00011	1.88674	0.00012	0.282707	4.4e-05	0.001449	2.1e-05	4.68194	1.55716	973.33
OU85069 - 7	341.6	3.9	1.46706	0.00013	1.88696	0.00011	0.282714	4.1e-05	0.00134	1.2e-05	4.79177	1.45097	960.315
OU85069 - 8	341.9	3.4	1.46713	0.00014	1.88686	8.9e-05	0.282706	4.2e-05	0.001129	2.3e-05	4.56291	1.48636	975.114
OU85069 - 9	342.1	4.8	1.46708	0.00012	1.88673	0.00011	0.282721	3.4e-05	0.001633	1.8e-05	4.98379	1.20324	948.492
OU85069 - 10	336.1	3.9	1.46716	0.0001	1.88687	9.5e-05	0.282731	4e-05	0.00151	4.6e-05	5.23748	1.41556	927.586
OU85069 - 11	344	4.5	1.46711	0.00016	1.88685	0.00012	0.282705	3e-05	0.0013372	6.2e-06	4.52542	1.06169	979.164
OU85069 - 12	341.5	2.9	1.46716	8.5e-05	1.88686	0.00011	0.28268	2.9e-05	0.001184	1.7e-05	3.6217	1.02629	1034.64
OU85069 - 13	345	3.5	1.46711	0.00015	1.88673	8.8e-05	0.282734	4.4e-05	0.001464	1.3e-05	5.54419	1.55715	915.112
OU85069 - 14	348.7	4.4	1.46698	0.00014	1.88685	0.00011	0.282723	4.9e-05	0.00142	0.0001	5.24418	1.73411	937.149
OU85069 - 15	345.5	3.6	1.46716	0.00012	1.88681	9.9e-05	0.282749	3.7e-05	0.0012446	3.5e-06	6.13597	1.30942	877.805
OU85069 - 16	346.8	3.3	1.46706	9.3e-05	1.88679	9.8e-05	0.282712	3.7e-05	0.001257	4.4e-05	4.85168	1.30943	960.626
OU85069 - 17	516	16	1.46703	0.00012	1.88687	9.7e-05	0.282733	4.2e-05	0.001288	2.6e-05	9.23278	1.48694	815.097
OU85069 - 18	341.1	3.3	1.46711	0.00015	1.88683	9.2e-05	0.282717	3.9e-05	0.001612	3.3e-05	4.82571	1.38019	957.759
OU85069 - 19	341.1	2.9	1.46708	0.00015	1.88683	0.00012	0.282732	3.3e-05	0.001375	1.2e-05	5.41014	1.16785	920.557
OU85069 - 20	355.7	5.6	1.46703	0.00015	1.88678	0.00011	0.282725	3.9e-05	0.0012197	7.6e-06	5.5121	1.38023	925.637
OU85069 - 21	349.8	7.8	1.46712	0.00012	1.88682	0.00012	0.282756	3.9e-05	0.001066	1.7e-05	6.5177	1.38021	856.878
OU85069 - 22	343.3	3.6	1.46716	0.00013	1.88695	0.00013	0.282735	4.4e-05	0.001542	3.9e-05	5.52548	1.55714	914.956
OU85069 - 23	344	3.2	1.46714	0.00011	1.88699	9.6e-05	0.282703	3.8e-05	0.001507	3e-05	4.41592	1.34481	986.129
OU85069 - 24	343.2	3.2	1.46713	0.00011	1.88685	9.4e-05	0.282736	2.7e-05	0.001516	5.9e-05	5.56465	0.955519	912.382
OU85069 - 25	345.8	3.8	1.46709	0.00011	1.8867	8.4e-05	0.282761	3.4e-05	0.001251	1.9e-05	6.56564	1.20325	850.651
OU49153
OU49153 - 1	226.1	5.1	1.46713	0.00014	1.88686	0.0001	0.282892	4.2e-05	0.000687	1.6e-05	8.71166	1.48597	618.745
OU49153 - 2	231.2	3.7	1.46706	9.8e-05	1.88676	0.00011	0.282881	4.7e-05	0.001146	2.3e-05	8.36367	1.66289	645.027
OU49153 - 3	230.6	4.6	1.46711	0.00011	1.88677	0.00012	0.28289	3.7e-05	0.0007686	6.9e-06	8.72678	1.30909	621.347
OU49153 - 4	232.8	5.4	1.46714	0.00013	1.88677	0.00011	0.282873	2.8e-05	0.0006529	9.5e-06	8.1911	0.990664	657.321
OU49153 - 5	228.1	3.7	1.46719	0.0001	1.88681	0.00013	0.282884	3.4e-05	0.001221	1.8e-05	8.39169	1.20294	640.779
OU49153 - 6	227.4	5.6	1.46703	0.00012	1.88682	0.0001	0.282893	2.9e-05	0.0006282	3.5e-06	8.7843	1.02603	615.133
OU49153 - 7	235.6	5.8	1.46686	0.00016	1.88686	0.00013	0.282885	3.7e-05	0.00055	1.2e-05	8.69298	1.3091	627.472
OU49153 - 8	230.1	3.4	1.46705	0.00012	1.88678	0.0001	0.282878	3.9e-05	0.001329	1.5e-05	8.20595	1.37985	654.231
OU49153 - 9	228.5	3	1.46712	0.00012	1.88675	0.00012	0.28292	3.6e-05	0.0006912	2.9e-06	9.75413	1.2737	553.975
OU49153 - 10	230.6	4.3	1.46708	0.00012	1.8868	0.00011	0.282925	3.9e-05	0.000814	2e-05	9.95818	1.37985	542.579
OU49153 - 11	228.1	5	1.46709	9.3e-05	1.88703	0.00011	0.282869	3.3e-05	0.000896	4.1e-05	7.91006	1.16756	671.543
OU49153 - 12	232.1	5.4	1.46709	0.0001	1.88686	0.00011	0.282884	2.4e-05	0.0004547	1.6e-06	8.59543	0.849139	630.932
OU49153 - 13	225.8	3.8	1.46715	0.0001	1.88696	0.00013	0.282901	3.4e-05	0.0013763	1.2e-06	8.9205	1.20293	605.157
OU49153 - 14	227.3	3.2	1.4671	9.8e-05	1.88683	0.0001	0.282886	3.4e-05	0.0012081	3e-06	8.44719	1.20293	636.598
OU49153 - 15	229.1	3.9	1.46711	0.00011	1.88684	0.0001	0.282871	3.6e-05	0.000828	4.3e-05	8.01284	1.2737	665.772
OU84955
OU84955 - 1	310.2	4.5	1.46719	0.00017	1.8868	0.00011	0.282785	3.4e-05	0.0011077	9.5e-06	6.67834	1.20316	815.244
OU84955 - 2	311.2	6.4	1.46695	0.00019	1.88688	0.00012	0.282855	4e-05	0.001789	1.7e-05	9.03655	1.41548	665.437
OU84955 - 3	302.6	3.9	1.46717	0.00011	1.88689	0.00014	0.282775	4.1e-05	0.00131	2.7e-05	6.11972	1.45084	844.83
OU84955 - 4	301.3	3.6	1.46712	0.00013	1.88688	0.00012	0.282773	3.6e-05	0.001548	5.6e-05	5.97353	1.27391	853.114
OU84955 - 5	300.2	3.9	1.46703	8.7e-05	1.88685	0.00012	0.282767	3.3e-05	0.001676	5.5e-05	5.71232	1.16774	868.883
OU84955 - 6	299.6	3.9	1.46709	0.00016	1.88682	0.0001	0.282824	3.5e-05	0.001817	7.4e-05	7.68861	1.23851	742.375
OU84955 - 7	304.8	3.3	1.46717	0.00012	1.88695	0.00011	0.28278	3.1e-05	0.001783	4.3e-05	6.24836	1.09698	838.375
OU84955 - 8	297.4	2.7	1.46714	0.00014	1.88685	0.0001	0.282773	4.7e-05	0.002077	6e-05	5.78621	1.66314	861.957
OU84955 - 9	297.6	2.6	1.4671	0.00012	1.88675	0.00011	0.282758	4.2e-05	0.001522	7.3e-05	5.36903	1.48621	888.684
OU84955 - 10	302	4.4	1.46707	9.7e-05	1.8868	7.9e-05	0.282807	3.9e-05	0.001723	2e-05	7.15657	1.38007	778.237
OU84955 - 11	310.8	6.2	1.46708	0.00012	1.88675	0.00011	0.282746	3.9e-05	0.001555	2.8e-05	5.21909	1.38009	908.697
OU84955 - 12	287.6	3.9	1.46711	9.1e-05	1.88676	0.00013	0.282783	3.7e-05	0.001594	5.1e-05	6.02674	1.30925	838.861
OU84955 - 13	308.1	3.2	1.4672	8.2e-05	1.88683	9.3e-05	0.282782	3.7e-05	0.0018074	7.8e-06	6.38397	1.30931	832.348
OU84955 - 14	302.1	4.5	1.46709	0.00011	1.88675	9.2e-05	0.282784	3.5e-05	0.00176	0.00012	6.3374	1.23852	830.559
OU84955 - 15	307.3	4.3	1.46708	0.00012	1.88692	0.0001	0.282765	3.6e-05	0.001403	2.6e-05	5.84782	1.27392	865.881
OU84955 - 16	363.7	4.6	1.46704	0.00014	1.88684	9.2e-05	0.282673	3.6e-05	0.000788	3.5e-05	3.94827	1.27408	1031.48
OU84955 - 17	311.5	5.1	1.4671	0.00013	1.8868	0.00012	0.282825	4.3e-05	0.001353	5.7e-05	8.07128	1.52164	727.37
OU84955 - 18	309.6	5.5	1.46708	0.00013	1.88686	0.00013	0.282806	3.7e-05	0.00163	0.00011	7.30135	1.30932	775.022
OU84955 - 19	303.9	3	1.46701	0.00011	1.8868	9.9e-05	0.282824	4.1e-05	0.002136	3.1e-05	7.71525	1.45085	744.083
OU84955 - 20	301.6	5.1	1.46709	0.00012	1.8867	9.8e-05	0.282797	4.1e-05	0.001268	1.4e-05	6.88514	1.45084	795.235
OU84955 - 21	309	4.9	1.46711	9.9e-05	1.88684	0.0001	0.282786	4.2e-05	0.001379	8.3e-05	6.63225	1.48625	817.231
OU84955 - 22	304	4.6	1.46703	0.00013	1.88686	9e-05	0.282805	3.5e-05	0.001801	6e-05	7.11247	1.23853	782.635
OU84955 - 23	319.4	7.7	1.46708	0.00014	1.88685	0.00011	0.282767	3.5e-05	0.000726	2.3e-05	6.32095	1.23857	845.324
OU84955 - 24	301.7	5.3	1.4671	0.00013	1.88677	0.00012	0.282793	3.6e-05	0.001557	4.2e-05	6.68798	1.27391	807.889
OU84955 - 25	311.7	4.5	1.46715	0.00011	1.8868	0.0001	0.282812	4.1e-05	0.001809	8.8e-05	7.52136	1.45087	762.645
OU49124
OU49124 - 1	289.8	3.8	1.46718	0.00011	1.88687	9.9e-05	0.28257	3.8e-05	0.000951	1.1e-05	-1.3401	1.34464	1307.98
OU49124 - 2	339.9	3	1.46714	0.00011	1.88685	8.3e-05	0.282588	2.5e-05	0.0011	2.3e-05	0.350305	0.884733	1240.84
OU49124 - 3	350.8	4.2	1.46714	0.00013	1.88677	9.6e-05	0.282549	3.7e-05	0.000633	1e-05	-0.685725	1.30944	1315.03
OU49124 - 4	276.8	5.5	1.46713	0.00016	1.88675	9.8e-05	0.282601	2.4e-05	0.000433	2e-05	-0.430064	0.849224	1240.14
OU49124 - 5	341.9	3.2	1.46707	0.00011	1.88696	9.8e-05	0.282561	3.4e-05	0.0012043	4.3e-06	-0.585625	1.20324	1301.64
OU49124 - 6	349.1	4.9	1.46712	0.00013	1.8867	0.0001	0.282568	3.4e-05	0.000966	1.2e-05	-0.127645	1.20326	1278.39
OU49124 - 7	318.5	3.6	1.46703	0.00013	1.88684	9.8e-05	0.282558	3.4e-05	0.001361	8e-05	-1.22877	1.20318	1323.72
OU49124 - 8	380.3	4	1.46713	0.00013	1.88675	7.9e-05	0.282525	3.7e-05	0.001242	2.5e-05	-1.04175	1.30952	1360.94
OU49124 - 9	331.6	3.2	1.46703	0.00013	1.88667	0.00012	0.282613	4.9e-05	0.001254	3.2e-05	1.02182	1.73404	1191.74
OU49124 - 10	264.1	2.9	1.4671	0.00012	1.88681	9.2e-05	0.282544	2.9e-05	0.001021	3.7e-06	-2.82941	1.02612	1381.56
OU49124 - 11	122.5	8.2	1.46713	0.00013	1.88682	0.00012	0.282666	3.1e-05	5.39e-06	4.8e-07	-1.48841	1.09654	1184.49
OU49124 - 12	316.6	5.1	1.4671	0.00011	1.88664	7.9e-05	0.282595	2.5e-05	0.00067	1.2e-05	0.184831	0.884687	1232.83
OU49124 - 13	242.7	3.7	1.4671	0.00014	1.88686	9e-05	0.282581	3.1e-05	0.000961	1.4e-05	-1.97324	1.09683	1310.56
OU49124 - 14	356.6	3.8	1.4671	0.00012	1.88686	8.8e-05	0.282529	3.1e-05	0.00131	0.00014	-1.42642	1.09711	1366.44
OU49124 - 15	308	7.5	1.4672	0.00015	1.88683	0.00013	0.282614	4.2e-05	0.00176	4.7e-05	0.446542	1.48625	1209.44
OU49124 - 16	304.8	7	1.46709	0.00014	1.88682	9.4e-05	0.282588	3.6e-05	0.00098	0.0001	-0.383694	1.27392	1259.43
OU49124 - 17	243.4	7	1.46699	0.00013	1.8868	0.00011	0.282659	3.4e-05	0.000459	7e-05	0.882583	1.20298	1130.57
OU49124 - 18	349.8	5.5	1.46711	0.00012	1.88688	0.00013	0.282532	3e-05	0.001302	6e-05	-1.46441	1.0617	1363.44
OU49124 - 19	343	2.3	1.46709	0.00013	1.88682	9.1e-05	0.282589	3.6e-05	0.001648	8.8e-05	0.3281	1.27402	1244.71
OU49124 - 20	341.3	3.1	1.46706	0.00013	1.88678	0.00013	0.282604	4.7e-05	0.001411	3.1e-05	0.876436	1.6633	1208.64
OU49124 - 21	303.2	2.7	1.46717	0.00012	1.88688	9.4e-05	0.282562	3.6e-05	0.001724	9.9e-05	-1.48787	1.27391	1327.95
OU49124 - 22	254	3.4	1.46705	0.00011	1.88684	9e-05	0.282556	3.2e-05	0.000984	1.1e-05	-2.61695	1.13224	1360.15
OU49124 - 23	350.9	3.7	1.4671	0.00015	1.88678	0.00012	0.28258	3.3e-05	0.001337	1.5e-05	0.249804	1.16788	1255.93
OU49124 - 24	349.7	2.5	1.46712	0.00016	1.8868	0.00012	0.282604	4e-05	0.001386	2.6e-05	1.06206	1.4156	1203.55
OU49124 - 25	353.7	4.5	1.46703	0.0001	1.88681	9.4e-05	0.282575	2.9e-05	0.0009963	2.6e-06	0.212822	1.02632	1260.49
P76448
P76448 - 1	334.6	4.2	1.46719	0.00011	1.88686	0.00013	0.282721	3.3e-05	0.0009079	1.9e-06	4.9851	1.16783	942.462
P76448 - 2	338.2	6.1	1.46707	0.0001	1.88681	0.0001	0.282704	4.7e-05	0.001	1.3e-05	4.44113	1.66329	979.927
P76448 - 3	342.8	5.9	1.46712	0.00013	1.88689	0.00012	0.282707	3.2e-05	0.000885	1.1e-05	4.67319	1.13247	968.812
P76448 - 4	344.5	6.7	1.46705	0.00016	1.88683	0.00013	0.282755	4.4e-05	0.0008485	1.6e-06	6.41723	1.55715	859.083
P76448 - 5	339.8	6.2	1.46705	9.7e-05	1.88676	9.5e-05	0.28268	3.2e-05	0.0007121	9.7e-06	3.69133	1.13246	1028.87
P76448 - 6	351	8.6	1.46712	8.6e-05	1.8868	0.0001	0.282734	4.4e-05	0.000714	1.1e-05	5.847	1.55717	900.579
P76448 - 7	345.4	5.7	1.46717	8.4e-05	1.88677	0.00012	0.282743	3.1e-05	0.001286	6.4e-05	5.912	1.09708	891.998
P76448 - 8	350.1	6.6	1.46716	0.00013	1.88688	0.00011	0.28274	3.6e-05	0.000694	4.9e-05	6.04429	1.27404	887.294
P76448 - 9	341.8	9.1	1.46714	0.00012	1.88684	0.00014	0.282697	3.1e-05	0.000732	1.6e-05	4.33219	1.09707	989.71
P76448 - 10	358.9	6.4	1.46709	0.0002	1.88681	0.00013	0.282702	4.7e-05	0.001472	9.9e-05	4.70704	1.66337	979.422
P76448 - 11	339	6.2	1.46718	0.00014	1.88693	0.00012	0.282706	3.7e-05	0.000863	2.4e-05	4.56004	1.3094	972.998
P76448 - 12	344.2	6.3	1.46715	0.00012	1.88686	9.4e-05	0.282741	3e-05	0.001351	4.7e-05	5.80059	1.06169	898.145
P76448 - 13	347	6.7	1.4671	0.00013	1.88683	0.0001	0.282724	4.4e-05	0.0008017	5.9e-06	5.38539	1.55715	926.81
P76448 - 14	341.4	4.7	1.46712	0.00013	1.88677	9.4e-05	0.282737	3.4e-05	0.0008444	1.9e-06	5.71359	1.20324	901.468
P76448 - 15	345.5	5.9	1.46713	0.00017	1.88677	9.5e-05	0.282689	3.4e-05	0.000948	4.3e-05	4.08051	1.20325	1008.65
P76448 - 16	345	5.2	1.46714	0.00012	1.8868	0.00013	0.282664	3.8e-05	0.0010303	9.9e-06	3.16609	1.34481	1066.36
P76448 - 17	342.3	7.6	1.4671	0.00014	1.8869	0.00012	0.282688	4.4e-05	0.0008465	6.1e-06	3.99864	1.55714	1011.32
P76448 - 18	340.3	5.6	1.4672	0.00014	1.88676	0.00013	0.282722	3.5e-05	0.001193	2.3e-05	5.08015	1.23863	940.932
P76448 - 19	346.3	6.1	1.46713	0.00011	1.88679	9e-05	0.28272	3.4e-05	0.0007975	5.3e-06	5.22952	1.20325	936.179
P76448 - 20	330.6	4.5	1.46699	0.00012	1.88682	0.00012	0.282701	3.5e-05	0.000855	2.3e-05	4.20194	1.2386	989.112
P76448 - 21	346.1	6.8	1.46713	0.00015	1.88699	0.00011	0.282721	3.5e-05	0.0009221	2.6e-06	5.23196	1.23864	935.866
P76448 - 22	346	5.5	1.46714	0.00013	1.88688	0.00012	0.282707	3.7e-05	0.0009945	5.8e-06	4.71772	1.30942	968.516
P76448 - 23	342.9	5.5	1.46716	0.00012	1.88683	0.00011	0.282724	4.1e-05	0.001089	4.5e-05	5.23062	1.45097	933.414
P76448 - 24	341.7	6	1.46705	0.00015	1.8869	0.00012	0.282698	4.4e-05	0.001182	3e-05	4.26347	1.55714	994.001
P76448 - 25	349.7	6.8	1.46709	0.00013	1.88667	0.00012	0.282753	4.2e-05	0.001299	3.2e-05	6.35535	1.48638	867.15
18NF575
18NF575 - 1	340.9	6.6	1.46708	0.0001	1.88674	0.00013	0.282754	3.6e-05	0.0007408	6.5e-06	6.32772	1.27402	861.936
18NF575 - 2	342.7	5.5	1.46711	0.00012	1.88685	0.0001	0.282752	3.3e-05	0.001169	1e-05	6.19903	1.16785	871.566
18NF575 - 3	328.5	4	1.46711	9.5e-05	1.88696	9.5e-05	0.282736	4e-05	0.001282	1.4e-05	5.30184	1.41554	917.463
18NF575 - 4	341.9	4.6	1.46715	0.00012	1.88689	0.00014	0.282752	2.7e-05	0.001462	5e-05	6.11537	0.955516	876.264
18NF575 - 5	346.1	4.9	1.46707	0.00011	1.88694	0.00012	0.282779	3.8e-05	0.001461	9.1e-05	7.16094	1.34481	812.915
18NF575 - 6	337.1	4.4	1.46703	0.00015	1.88679	0.0001	0.28274	3.6e-05	0.001148	1.1e-05	5.65822	1.27401	901.586
18NF575 - 7	343.8	4	1.46694	0.00013	1.88685	0.00012	0.282757	3.2e-05	0.00141	3.1e-05	6.34479	1.13247	863.146
18NF575 - 8	331	5.4	1.46722	0.00012	1.88689	0.00011	0.282768	3.4e-05	0.001522	6.5e-05	6.43537	1.20321	847.225
18NF575 - 9	326	4.4	1.46681	0.00017	1.88702	0.00014	0.282779	6.3e-05	0.001824	3.2e-05	6.6527	2.22946	829.404
18NF575 - 10	342.7	4.7	1.46712	0.00012	1.8869	9.5e-05	0.282756	3.6e-05	0.00155	2.3e-05	6.25404	1.27402	868.059
18NF575 - 11	334.2	3.4	1.46713	0.00014	1.8869	0.00011	0.282747	4.3e-05	0.001418	6.9e-05	5.78353	1.52172	891.305
18NF575 - 12	338	4.9	1.46715	0.00012	1.88681	0.00011	0.282786	3e-05	0.0013864	8.1e-06	7.25214	1.06168	800.675
18NF575 - 13	340.7	4.7	1.46711	0.00013	1.88682	0.00013	0.282767	3.7e-05	0.00082	2.8e-05	6.76553	1.30941	833.861
18NF575 - 14	334.4	3.9	1.4671	0.00015	1.88682	9.4e-05	0.282752	3.8e-05	0.0012813	4.9e-06	5.99505	1.34478	877.986
18NF575 - 15	354.9	7	1.46702	0.00015	1.88677	0.00011	0.282767	3.4e-05	0.000423	1.2e-05	7.16871	1.20328	819.394
18NF575 - 16	338.8	3.4	1.46691	0.00012	1.8867	0.00011	0.282806	3.8e-05	0.001995	8.1e-05	7.84041	1.34479	763.754
18NF575 - 17	348.8	5.9	1.46719	0.00015	1.88674	0.00011	0.282699	4.5e-05	0.001625	4.5e-05	4.34957	1.59255	994.155
18NF575 - 18	368.8	9.4	1.46702	0.00012	1.88679	8.9e-05	0.282711	2.9e-05	0.000977	3.1e-05	5.35831	1.02636	945.815
18NF575 - 19	362	5.8	1.46701	9.9e-05	1.88678	0.00012	0.282757	4.4e-05	0.001068	3.4e-05	6.8168	1.55721	847.473
18NF575 - 20	357.3	5.5	1.46712	0.00015	1.88671	9.9e-05	0.282798	3.6e-05	0.001226	3.8e-05	8.12861	1.27407	760.005
18NF575 - 21	343.4	3.5	1.46713	0.00011	1.88683	7.3e-05	0.282754	3.4e-05	0.00157	3.4e-05	6.19364	1.20325	872.464
18NF575 - 22	341	4.1	1.46713	0.00014	1.88681	0.00012	0.282711	3.6e-05	0.001582	2.9e-05	4.61803	1.27402	970.894
18NF575 - 23	342.8	3.1	1.46704	9.7e-05	1.88683	0.00011	0.282747	3.5e-05	0.001785	2.2e-05	5.88427	1.23863	891.704
18NF575 - 24	319.9	3.9	1.46704	0.00012	1.88678	0.00013	0.282782	3.6e-05	0.001802	1.3e-05	6.6346	1.27396	825.723
18NF575 - 25	340.6	4.6	1.46716	0.00018	1.88685	8.3e-05	0.282732	4.1e-05	0.00141	0.0001	5.39152	1.45096	921.346
P61003
P61003 - 1	342.3	3.4	1.46699	0.00014	1.88679	0.00017	0.282647	5.8e-05	0.00466	0.00016	1.68243	2.05259	1158.36
P61003 - 2	339.7	5.1	1.46713	0.00014	1.88682	0.00011	0.282681	3.6e-05	0.00124	0.00011	3.60567	1.27402	1034.23
P61003 - 3	343.1	3.5	1.46712	0.00015	1.88675	0.00013	0.282638	5.1e-05	0.00347	0.00023	1.64995	1.80487	1161.05
P61003 - 4	339.9	3.3	1.46714	0.00012	1.88676	0.00014	0.282648	4.6e-05	0.003205	8.5e-05	1.99942	1.62791	1136.36
P61003 - 5	340.9	4.8	1.46713	0.00012	1.88678	0.00012	0.282618	3.7e-05	0.0004451	7.6e-06	1.58158	1.30941	1163.64
P61003 - 6	338.3	4.4	1.46708	0.0001	1.88694	0.00013	0.282588	3.9e-05	0.00132	0.00011	0.266398	1.38018	1244.88
P61003 - 7	345.5	4.2	1.46706	0.00015	1.88684	0.00012	0.282636	4e-05	0.000998	6.9e-05	2.1934	1.41559	1128.49
P61003 - 8	352.5	5.3	1.46703	0.00014	1.88683	9.1e-05	0.282617	3.2e-05	0.001051	1.7e-05	1.66041	1.13249	1167.85
P61003 - 9	344.4	3.9	1.4671	0.0001	1.88679	0.00013	0.282658	4.6e-05	0.00179	0.00013	2.76732	1.62793	1091.2
P61003 - 10	339.1	4.4	1.46711	0.00016	1.88682	0.00013	0.282602	4.8e-05	0.001852	8.9e-05	0.659447	1.69868	1220.64
P61003 - 11	351.7	6.2	1.4669	0.00013	1.88684	0.0001	0.28264	2.5e-05	0.000367	3.5e-05	2.61654	0.884756	1106.56
P61003 - 12	340	5	1.46716	0.00014	1.88678	0.00012	0.282602	3.3e-05	0.000369	3.3e-05	1.01265	1.16785	1198.98
P61003 - 13	374.5	9.4	1.46706	0.00011	1.88678	0.00013	0.282623	4.5e-05	0.001111	2.3e-05	2.33433	1.59264	1142.55
P61003 - 14	343.5	2.9	1.46714	0.00013	1.88675	0.00011	0.28269	4.1e-05	0.00219	0.00017	3.78967	1.45097	1025.55
P61003 - 15	348.5	4.6	1.4671	0.00012	1.88693	0.00013	0.282637	2.5e-05	0.000751	5.7e-05	2.35091	0.88475	1120.88
P61003 - 16	356	6.1	1.46694	0.00014	1.88694	0.00013	0.282617	3.3e-05	0.001099	9.7e-05	1.72487	1.16789	1166.54
P61003 - 17	338.1	4	1.46716	0.00012	1.88688	0.00011	0.28268	4.1e-05	0.001816	8.7e-05	3.40676	1.45096	1045.6
P61003 - 18	331.5	4.3	1.46706	0.00012	1.88671	0.00012	0.282641	3.6e-05	0.0005631	7.8e-06	2.16235	1.27399	1119.36
P61003 - 19	339.6	3.8	1.46706	0.00014	1.88692	0.00012	0.282647	5.3e-05	0.00333	0.0001	1.92983	1.87563	1140.53
P61003 - 20	340.2	3.5	1.46714	9.4e-05	1.88693	0.00011	0.282651	2.2e-05	0.00117	0.00021	2.57053	0.778566	1100.36
P57098
P57098 - 1	129.4	3.2	1.46702	0.00015	1.88683	0.0001	0.282896	4.3e-05	0.0007485	8.2e-06	6.73715	1.52103	668.08
P57098 - 2	317.4	3.7	1.46718	0.00012	1.88687	8.5e-05	0.282798	3.9e-05	0.003202	8.7e-05	6.85347	1.38011	809.782
P57098 - 3	129.9	2.4	1.46709	0.00017	1.88675	0.00011	0.282914	4.3e-05	0.000963	2.7e-05	7.36632	1.52103	628.348
P57098 - 4	130.2	2.9	1.46715	0.00011	1.88691	0.00012	0.282874	4.1e-05	0.001535	2.7e-05	5.90865	1.45028	721.512
P57098 - 5	125.3	2.6	1.46726	0.00014	1.88682	0.00015	0.28281	4.7e-05	0.001668	3.7e-05	3.52973	1.6625	868.932
P57098 - 6	349.3	4.5	1.46706	0.00012	1.88677	0.00011	0.282748	3.9e-05	0.00145	2.2e-05	6.13484	1.38021	880.889
P57098 - 7	127.9	2.6	1.46706	0.00013	1.88678	8.6e-05	0.282861	4.4e-05	0.000943	1.9e-05	5.45002	1.55639	748.891
P57098 - 8	315.7	6.1	1.46719	0.00013	1.88674	0.00013	0.282729	3.2e-05	0.000539	3.9e-05	4.93445	1.1324	930.7
P57098 - 9	325.3	3.4	1.46716	0.00012	1.88678	0.00012	0.282756	3.8e-05	0.001942	4e-05	5.79854	1.34475	883.292
P57098 - 10	335.5	6.5	1.46729	0.00014	1.88689	0.00011	0.282766	3.6e-05	0.000341	1e-05	6.72323	1.274	832.436
P57098 - 11	327.2	3.2	1.46709	0.00011	1.88678	0.00011	0.282763	4e-05	0.0012049	5.5e-06	6.2461	1.41553	856.279
P57098 - 12	308.7	4.3	1.46715	0.00012	1.88688	0.00012	0.282785	6e-05	0.00258	0.00038	6.34478	2.12321	835.321
P57098 - 13	141.8	3.6	1.46705	0.00013	1.8869	0.00013	0.282885	3.7e-05	0.000631	4.1e-05	6.62896	1.30883	684.819
P57098 - 14	120.6	2.3	1.46708	0.00014	1.88688	0.0001	0.282891	3.4e-05	0.00107	0.0001	6.34316	1.20265	686.209
P57098 - 15	127.1	1.2	1.46712	0.00011	1.88681	0.00011	0.28294	3.4e-05	0.003289	8.8e-05	8.02999	1.20267	583.763
P57098 - 16	326.5	3.9	1.46721	0.00013	1.88691	0.00015	0.282724	6.7e-05	0.003213	4.6e-05	4.41636	2.37101	972.225
P57098 - 17	287.2	7.8	1.46702	0.00012	1.887	0.00014	0.282756	3.8e-05	0.001878	1.4e-05	5.0088	1.34464	903.367
P57098 - 18	235.3	5	1.4671	0.00011	1.88679	0.0001	0.282791	3.3e-05	0.000428	5.2e-05	5.37958	1.16758	838.6
P57098 - 19	309	4.5	1.46712	0.00011	1.88695	0.00011	0.282723	3.2e-05	0.001716	2.9e-05	4.33388	1.13238	963.593
P57098 - 20	127.1	2.9	1.46714	0.00013	1.88678	0.00013	0.282858	3.7e-05	0.001247	3.1e-05	5.30105	1.30878	757.738
P57098 - 21	121.8	2.2	1.467	0.00017	1.88677	0.00013	0.282875	4.2e-05	0.00207	0.00019	5.72254	1.48563	726.698
P57098 - 22	319.9	5.1	1.46699	0.00012	1.88699	0.00013	0.28276	5.2e-05	0.002167	8.1e-05	5.77869	1.84016	880.275
P57098 - 23	318.8	3.7	1.46716	0.00011	1.88681	0.00011	0.282751	3e-05	0.001541	6.4e-05	5.56945	1.06163	892.731
OU49137
OU49137 - 1	346.2	5.7	1.46724	0.0001	1.88677	0.00014	0.282707	3.8e-05	0.001144	6e-05	4.68775	1.34481	970.581
OU49137 - 2	341.9	5.1	1.46709	0.00013	1.88694	0.00013	0.282737	4.5e-05	0.001337	7e-05	5.61285	1.59253	908.281
OU49137 - 3	334.6	3.6	1.46712	0.00013	1.88692	0.00011	0.282778	4.4e-05	0.001722	3e-05	6.82173	1.55711	825.441
OU49137 - 4	349.2	5.2	1.46707	0.00013	1.88684	0.00011	0.28273	2.8e-05	0.001211	6e-05	5.551	0.990922	918.007
OU49137 - 5	340.4	4.6	1.467	0.00012	1.88668	0.00011	0.282724	4.2e-05	0.001613	4.1e-05	5.05832	1.48635	942.401
OU49137 - 6	338	5.1	1.46709	0.00012	1.88676	0.00011	0.282783	4e-05	0.001681	5.2e-05	7.07997	1.41557	811.661
OU49137 - 7	337.8	4.5	1.46712	0.00012	1.88683	0.0001	0.282738	3e-05	0.0014609	9.4e-06	5.53249	1.06167	910.149
OU49137 - 8	339.6	4.4	1.46721	0.00011	1.88677	0.00013	0.282761	3.9e-05	0.0014936	9.4e-06	6.37757	1.38018	857.727
OU49137 - 9	330.7	6.7	1.46704	0.00011	1.88699	0.00012	0.28277	4.3e-05	0.000717	3.1e-05	6.67617	1.52171	831.633
OU49137 - 10	338.7	4.1	1.46696	0.00017	1.88672	0.00011	0.282752	4.3e-05	0.001237	3.1e-05	6.09745	1.52174	874.869
OU49137 - 11	332.5	4.8	1.46716	0.00017	1.88694	0.00012	0.282766	5.3e-05	0.002514	2e-05	6.17799	1.8756	864.821
OU49137 - 12	328.5	3.9	1.46715	0.00011	1.8869	0.00012	0.282781	3.9e-05	0.00172	0.00012	6.79896	1.38015	822.058
OU49137 - 13	345.7	4	1.46702	0.00014	1.88675	0.00011	0.282734	4e-05	0.001571	1.1e-05	5.53463	1.41559	916.275
OU49137 - 14	340.8	5.1	1.46711	0.00014	1.88661	0.0001	0.282748	3.8e-05	0.00138	0.00012	5.96881	1.3448	884.732
OU49137 - 15	328.9	3.8	1.46712	0.00014	1.88672	0.00014	0.282768	3.4e-05	0.001513	2e-05	6.39251	1.20321	848.293
OU49137 - 16	329.5	4.4	1.4672	0.00011	1.88679	0.00012	0.282758	4.7e-05	0.001513	8.2e-05	6.05144	1.66326	870.508
OU49137 - 17	333.9	6	1.4669	0.00017	1.88684	0.00011	0.282765	4.8e-05	0.00122	0.00013	6.45792	1.69866	848.086
OU49137 - 18	352.9	6	1.46705	0.00013	1.88675	0.00013	0.282757	3.7e-05	0.000996	8.8e-05	6.63659	1.30944	851.754
P70217
P70217 - 1	348.5	4.6	1.4672	0.00014	1.88686	0.00012	0.282453	3.9e-05	0.001296	1e-05	-4.28675	1.38021	1540.38
P70217 - 2	393.1	7.6	1.46709	0.00011	1.88684	0.00011	0.282496	3.3e-05	0.001247	8.1e-05	-1.79382	1.16799	1418.6
P70217 - 3	734	17	1.46712	0.00016	1.88687	0.00013	0.282262	4e-05	0.000775	4.4e-05	-2.48218	1.41683	1732.23
P70217 - 4	364.9	6.4	1.46712	0.00011	1.88686	9.6e-05	0.282496	3.4e-05	0.000899	7.6e-05	-2.31664	1.2033	1429.23
P70217 - 5	354.3	6	1.46702	0.00011	1.88677	0.00012	0.282512	4.3e-05	0.001344	1e-05	-2.08543	1.52179	1406.23
P70217 - 6	360.1	4.4	1.46713	0.00013	1.8868	0.00011	0.282499	3.2e-05	0.001476	6.2e-05	-2.45261	1.13251	1434
P70217 - 7	339.3	4	1.46717	9.9e-05	1.8869	0.00011	0.28249	5.4e-05	0.0024	1.8e-05	-3.42317	1.91102	1478.69
P70217 - 8	459	4.8	1.46708	0.00016	1.88676	0.0001	0.282427	3.9e-05	0.001365	3.9e-05	-2.85223	1.38055	1537.66
P70217 - 9	344.2	2.6	1.46715	0.00013	1.88677	0.00011	0.282502	3.7e-05	0.001649	6.2e-05	-2.72553	1.30942	1438.6
P70217 - 10	339.4	3.2	1.46716	0.00011	1.88685	0.0001	0.282516	3e-05	0.001433	4.8e-05	-2.28344	1.06168	1406.9
P70217 - 11	344.5	8.6	1.4671	0.00013	1.88684	0.0001	0.28251	3.4e-05	0.00102	1.9e-05	-2.29241	1.20325	1411.51
P70217 - 12	344.3	3	1.46708	0.00013	1.88674	0.00011	0.282494	3.4e-05	0.002415	6.5e-05	-3.18134	1.20325	1467.42
P70217 - 13	334.2	2.9	1.46712	0.00013	1.88678	0.00011	0.28248	5.4e-05	0.002801	1.7e-05	-3.97164	1.911	1509.19
P70217 - 14	340.1	2.8	1.467	0.00011	1.88679	0.00012	0.282564	5e-05	0.002406	6.3e-05	-0.789122	1.76947	1313.08
P70217 - 15	936.6	8.8	1.46709	0.00016	1.88673	7.9e-05	0.282298	3.2e-05	0.000735	5.1e-05	3.28648	1.13398	1527.02
P70217 - 16	324.5	3.7	1.46715	0.00015	1.88682	9.5e-05	0.282559	4.7e-05	0.00263	1.7e-05	-1.33772	1.66324	1335.36
P70217 - 17	360	2.5	1.46702	0.00011	1.88681	9.5e-05	0.282557	3.8e-05	0.00246	0.00011	-0.636926	1.34485	1319.24
P70217 - 18	346.8	6.3	1.46713	0.0001	1.88692	0.0001	0.282501	4.1e-05	0.001531	2.5e-05	-2.67857	1.45098	1437.7
P70217 - 19	346.6	5	1.4671	0.00013	1.88665	9.1e-05	0.282472	3.1e-05	0.000484	1.3e-05	-3.46859	1.09709	1487.34
P70217 - 20	350.9	4.6	1.46711	0.00014	1.88672	7.5e-05	0.282521	4.4e-05	0.002313	5.9e-05	-2.06525	1.55717	1402.25
P70217 - 21	341.2	3.2	1.46703	0.00015	1.88682	0.00013	0.282491	5e-05	0.003056	2.1e-05	-3.49674	1.76947	1484.83
P70217 - 22	341.5	5.4	1.46715	0.00011	1.88679	0.0001	0.282511	4.1e-05	0.001675	1.3e-05	-2.47026	1.45097	1420.35
P89666
P89666 - 1	123.5	2.1	1.4672	0.00013	1.8869	0.00011	0.282761	5e-05	0.001664	5.9e-05	1.75875	1.76861	979.867
P89666 - 2	126.6	2.8	1.46715	0.00015	1.88681	0.00011	0.282795	3.3e-05	0.000979	1.6e-05	3.0843	1.16729	898.248
P89666 - 3	123.2	3.7	1.4672	0.00011	1.88686	0.00012	0.282742	3e-05	0.000792	1.4e-05	1.15137	1.06117	1018.11
P89666 - 4	129.6	3.8	1.46708	0.00011	1.88675	0.00015	0.282749	3.8e-05	0.000846	1.8e-05	1.53336	1.34416	998.995
P89666 - 5	291.5	8	1.46717	0.00013	1.88677	0.00011	0.282734	3.1e-05	0.000985	4.5e-05	4.49342	1.09695	939.568
P89666 - 6	124.3	2.1	1.46713	9.2e-05	1.88667	0.00013	0.282754	3.7e-05	0.002027	2.4e-05	1.49823	1.30878	997.012
P89666 - 7	123.5	1.9	1.46706	0.00011	1.88672	0.00011	0.282805	3.3e-05	0.00088	1.8e-05	3.37915	1.16728	877.066
P89666 - 8	124.5	3.8	1.46703	9e-05	1.88683	0.00014	0.282819	4.2e-05	0.000751	2.6e-05	3.90665	1.48564	844.352
P89666 - 9	126.6	2.5	1.46706	0.00011	1.88673	0.00011	0.28277	4.5e-05	0.001064	2.4e-05	2.19287	1.59176	954.807
P89666 - 10	124.9	2.7	1.46715	0.00014	1.88687	0.00011	0.282805	3.7e-05	0.001238	6.4e-05	3.37992	1.30878	878.129
P89666 - 11	129.3	4.3	1.46703	0.00014	1.88692	0.00012	0.282805	4.6e-05	0.001398	2.2e-05	3.46053	1.62714	876.503
P89666 - 12	127.1	2.4	1.46719	0.00015	1.88687	0.0001	0.282809	4.3e-05	0.001489	6.1e-05	3.54746	1.52102	869.235
P89666 - 13	125.1	3.4	1.46696	0.00014	1.88678	0.00015	0.282798	4.5e-05	0.001205	7.1e-05	3.13933	1.59176	893.564
P89666 - 14	146.4	6.4	1.46704	0.00016	1.88672	0.00011	0.28275	4.3e-05	0.000536	3e-05	1.96316	1.52108	985.095
P89666 - 15	127.6	3	1.46706	0.00015	1.88691	0.00011	0.282769	4.4e-05	0.00133	0.00014	2.1566	1.55639	957.901
P89666 - 16	123.1	2.7	1.46709	0.00012	1.88686	0.00012	0.282792	4.7e-05	0.00234	0.00027	2.79182	1.66249	914.033
P89666 - 17	129.6	3.5	1.46712	0.00014	1.88683	7.8e-05	0.282763	3.5e-05	0.000565	4.6e-05	2.05266	1.23805	966.08
P89666 - 18	131.4	5	1.46703	0.00015	1.88675	0.00011	0.282853	4.1e-05	0.00146	0.00019	5.19783	1.45029	767.721
P89666 - 19	127.1	3.7	1.46715	0.00015	1.88667	8.5e-05	0.28271	3.8e-05	0.001042	3.5e-05	0.0831422	1.34416	1088.82
P89666 - 20	130.3	4.8	1.4671	0.00011	1.88687	0.00012	0.282748	3.7e-05	0.001082	4.1e-05	1.49283	1.30879	1002.12
P89666 - 21	124.2	2.8	1.46718	0.00011	1.88689	0.00012	0.282806	4.2e-05	0.001512	3.5e-05	3.37779	1.48564	877.708
P89666 - 22	126.7	3.4	1.46707	0.00011	1.88682	0.00012	0.282753	3.7e-05	0.00088	1.7e-05	1.60911	1.30878	991.892
P77085
P77085 - 1	318.8	2.3	1.46704	0.00011	1.88672	0.00011	0.282731	3.7e-05	0.0020611	6.1e-06	4.75182	1.30934	944.779
P77085 - 2	313	2.3	1.46709	0.00013	1.8868	0.00012	0.282695	4.4e-05	0.002326	2.2e-05	3.30131	1.55704	1032.39
P77085 - 3	263.3	3.3	1.46704	9.6e-05	1.88677	0.00011	0.28272	3.6e-05	0.001807	2.9e-05	3.2437	1.2738	996.626
P77085 - 4	330.1	2.9	1.46712	0.00011	1.88694	0.00012	0.282675	3.6e-05	0.001851	2.9e-05	3.05305	1.27399	1061.72
P77085 - 5	286.4	5.3	1.46713	0.00013	1.88686	0.0001	0.282727	3.4e-05	0.001679	1.4e-05	4.00352	1.20309	966.673
P77085 - 6	271.4	3.2	1.46707	0.00012	1.88678	0.00011	0.282708	3.5e-05	0.001355	6.1e-05	3.07137	1.23844	1013.99
P77085 - 7	278	4.5	1.46705	0.00016	1.88673	6.3e-05	0.282709	3.3e-05	0.001546	3.9e-05	3.21295	1.16769	1010.24
P77085 - 8	331.5	3.8	1.46712	0.00011	1.88675	0.0001	0.282729	2.9e-05	0.00201	0.00015	4.95866	1.02627	941.687
P77085 - 9	345.2	3	1.46717	0.00016	1.88695	0.0001	0.282709	3.3e-05	0.001636	9.2e-05	4.62436	1.16786	973.821
P77085 - 10	293.8	3.3	1.46717	0.0001	1.88668	0.00011	0.282719	3.1e-05	0.002276	9.3e-05	3.76121	1.09696	987.943
P77085 - 11	311.2	3.6	1.46712	0.00014	1.88683	8.5e-05	0.282736	3.4e-05	0.00179	0.00011	4.82529	1.20316	934.078
P77085 - 12	317.3	3	1.46708	0.00012	1.88684	8.8e-05	0.282696	3.6e-05	0.001926	1.1e-05	3.51021	1.27395	1022.53
P77085 - 13	287.2	2.4	1.46708	0.00018	1.88688	0.0001	0.282728	4.8e-05	0.00278	0.00011	3.84642	1.69849	977.293
P77085 - 14	311.7	2.3	1.46706	0.00014	1.88688	8.2e-05	0.28275	3.5e-05	0.002574	4e-05	5.16936	1.23855	912.577
P77085 - 15	269.2	2.2	1.46713	0.00013	1.88683	9.5e-05	0.282704	3.7e-05	0.0028663	9.7e-06	2.61328	1.3092	1041.33
P77085 - 16	312.2	3.3	1.46704	0.00014	1.88698	0.00011	0.282713	4.1e-05	0.001723	9.1e-05	4.04639	1.45087	984.411
P77085 - 17	272.2	2.8	1.467	0.00013	1.88675	7.9e-05	0.28278	3.3e-05	0.002029	1.9e-05	5.51464	1.16767	859.269
P77085 - 18	297.1	4.8	1.46703	0.00013	1.88678	0.0001	0.282709	4.4e-05	0.001365	7.7e-05	3.65536	1.55698	997.287
P77085 - 19	167.6	4.2	1.46716	0.00012	1.88679	9.7e-05	0.282743	3.4e-05	0.000935	1.5e-05	2.1357	1.20277	990.987
P77085 - 20	117.1	2.3	1.46718	0.00012	1.88685	0.00011	0.282764	3.2e-05	0.000967	2.6e-05	1.78352	1.1319	973.214
P77085 - 21	286.8	4.7	1.46712	0.00013	1.88678	8.2e-05	0.282788	4.3e-05	0.001703	4.5e-05	6.16594	1.52156	829.356
P77085 - 22	258.6	4.9	1.46708	0.00011	1.88674	0.00012	0.282713	3.6e-05	0.001462	2.6e-05	2.95587	1.27378	1011.17
P77085 - 23	291.8	3.2	1.46703	0.00013	1.88687	0.00011	0.282759	5.7e-05	0.001994	1.8e-05	5.18951	2.01697	895.513
P77085 - 24	119.9	2.6	1.46716	0.00015	1.88686	0.00011	0.282782	4.2e-05	0.0012631	5.7e-06	2.45723	1.48562	932.72
P77085 - 25	296.9	3.7	1.46711	9e-05	1.88679	0.00012	0.282703	3.6e-05	0.001914	3.3e-05	3.33077	1.27389	1017.75
OU50098
OU50098 - 1	366.6	7.5	1.46719	0.00017	1.88693	0.00012	0.282486	3.9e-05	0.0006417	8.6e-06	-2.57104	1.38027	1446.63
OU50098 - 2	360.4	3.4	1.46705	0.00014	1.8869	0.00011	0.282421	3.2e-05	0.001096	2.2e-05	-5.1159	1.13251	1602
OU50098 - 3	378	5.1	1.46701	0.00013	1.88674	9.8e-05	0.282475	3.5e-05	0.001596	5.7e-05	-2.94962	1.23873	1479.55
OU50098 - 4	379.2	4.8	1.46707	0.00017	1.88682	0.00013	0.282552	5.7e-05	0.000699	1.5e-05	0.0267036	2.01737	1292.5
OU50098 - 5	789	25	1.46713	0.00012	1.88679	0.00011	0.282199	3.4e-05	0.001759	5.7e-05	-4.0204	1.20445	1872.79
OU50098 - 6	366.6	5.1	1.46711	0.00013	1.88682	9.6e-05	0.282453	3.4e-05	0.001262	2.3e-05	-3.88973	1.20331	1529.75
OU50098 - 7	372.6	4.4	1.46717	0.00013	1.88682	8.5e-05	0.282404	2.9e-05	0.001064	1.5e-05	-5.44597	1.02637	1632.44
OU50098 - 8	347.3	3.4	1.46712	0.0001	1.8868	9.5e-05	0.282409	2.6e-05	0.00187	1.8e-05	-6.00182	0.920138	1647.29
OU50098 - 9	425.9	6.7	1.46712	0.00014	1.88683	8.9e-05	0.282451	3.6e-05	0.00125	0.00012	-2.68097	1.27426	1500.61
OU50098 - 10	369.6	4.1	1.46709	0.00013	1.88679	9e-05	0.282419	3e-05	0.000424	6e-05	-4.82316	1.06175	1590.89
OU50098 - 11	411	4.4	1.46709	0.00011	1.88686	0.00012	0.28241	3.5e-05	0.001013	5e-05	-4.38848	1.23882	1596.39
OU50098 - 12	406.3	5.2	1.46712	0.00011	1.88679	9.7e-05	0.282434	2.7e-05	0.000961	6.8e-05	-3.62693	0.955654	1544.7
OU50098 - 13	385.5	7.5	1.46714	0.00013	1.88683	9.2e-05	0.2824	2.9e-05	0.000685	2.7e-05	-5.2115	1.02639	1627.94
OU50098 - 14	403.5	8.6	1.46706	0.00013	1.88685	9.7e-05	0.28239	3.7e-05	0.000737	3.4e-05	-5.18516	1.30959	1640.57
OU50098 - 15	1048	11	1.4671	0.00013	1.88674	8.2e-05	0.282307	3.9e-05	0.001252	1.7e-05	5.71239	1.38239	1460.53
OU50098 - 16	559	4.7	1.4671	0.00014	1.88677	0.00012	0.282371	2.4e-05	2.324e-05	6.8e-07	-2.18601	0.849761	1574.91
OU50098 - 17	367.5	4.5	1.4671	0.00013	1.88674	8.4e-05	0.282442	3.6e-05	0.001246	1.6e-05	-4.25578	1.27409	1553.51
OU50098 - 18	356.3	2.4	1.46702	0.00013	1.88684	7.5e-05	0.282347	3.7e-05	0.002015	2.5e-05	-8.04048	1.30945	1782.37
OU50098 - 19	365.1	4.7	1.4671	0.00014	1.88673	0.0001	0.282428	3.3e-05	0.001165	1.1e-05	-4.78329	1.16791	1584.81
OU50098 - 20	374.5	5.1	1.46704	0.00012	1.8869	0.0001	0.282414	2.9e-05	0.000588	1.5e-05	-4.93274	1.02637	1601.67
OU50098 - 21	373.9	5.7	1.46718	0.00013	1.88687	9.6e-05	0.282402	3.7e-05	0.000882	1.3e-05	-5.4435	1.3095	1633.32
OU50098 - 22	376.6	6.7	1.46702	0.00012	1.8868	9.3e-05	0.282355	3.1e-05	0.000667	2.6e-05	-6.9945	1.09716	1732.89
OU50098 - 23	373.9	3.9	1.46709	0.00014	1.88686	0.0001	0.282465	4.1e-05	0.001301	2.5e-05	-3.31769	1.45107	1499.5
OU50098 - 24	495	21	1.46706	0.00019	1.8868	0.00014	0.282258	4.1e-05	0.000632	6.7e-05	-7.82054	1.45147	1878.67
OU50098 - 25	388.1	4.3	1.46713	0.00012	1.88685	7.5e-05	0.28242	4e-05	0.001261	5.8e-05	-4.59496	1.41573	1591.21
P71392
P71392 - 1	344	11	1.46737	0.00014	1.88701	9.3e-05	0.282662	4.3e-05	0.0007437	9.8e-06	3.13899	1.52175	1067.29
P71392 - 2	360	12	1.46739	0.00011	1.88707	9.9e-05	0.282617	3.4e-05	0.000508	2.1e-05	1.95241	1.20329	1155.28
P71392 - 3	370.9	9.5	1.46732	0.00012	1.8869	9.5e-05	0.282664	3.1e-05	0.000817	2.8e-05	3.77985	1.09715	1047.9
P71392 - 4	351.5	9.2	1.46737	0.00014	1.88701	9.1e-05	0.282682	3.4e-05	0.000933	3.6e-05	3.96662	1.20327	1020.65
P71392 - 5	360.3	9.2	1.46737	9.9e-05	1.887	8.3e-05	0.282631	3.3e-05	0.000828	1.4e-05	2.37805	1.1679	1128.52
P71392 - 6	362	13	1.46741	0.00013	1.88706	0.00013	0.282607	3.5e-05	0.000562	2.2e-05	1.62958	1.23869	1177.33
P71392 - 7	372	12	1.46742	0.00014	1.88698	9e-05	0.282615	3e-05	0.0002638	3.3e-06	2.20611	1.06176	1148.7
P71392 - 8	359	10	1.46737	8.8e-05	1.88695	8.8e-05	0.282615	2e-05	0.000318	6e-06	1.90484	0.707817	1157.5
P71392 - 9	367	12	1.46732	0.00012	1.88694	8.8e-05	0.282642	3.1e-05	0.000679	3.9e-05	2.94972	1.09714	1097.54
P71392 - 10	359	13	1.46742	8.5e-05	1.88705	7.6e-05	0.282625	3.4e-05	0.0003612	8.6e-06	2.24846	1.20329	1135.71
P71392 - 11	372	13	1.46738	0.00012	1.88689	0.00013	0.282647	3.7e-05	0.000466	1.3e-05	3.28877	1.3095	1079.97
P71392 - 12	373	11	1.46737	0.00012	1.88698	0.00011	0.28265	2.5e-05	0.0005498	9.2e-06	3.39628	0.884799	1073.94
P71392 - 13	356.3	9.6	1.46742	9.6e-05	1.88702	7.7e-05	0.282567	2.3e-05	0.00065	3.3e-05	0.0678805	0.813984	1271.73
P71392 - 14	362	12	1.46735	0.00013	1.88691	9.7e-05	0.282646	3.1e-05	0.000545	2.3e-05	3.01391	1.09712	1089.5
P71392 - 15	369	11	1.46736	0.0001	1.88698	0.0001	0.282647	3.3e-05	0.0005989	7.7e-06	3.1901	1.16792	1083.86
P76172
P76172 - 1	160.7	4.7	1.4673	8.2e-05	1.88695	9.3e-05	0.282918	2.6e-05	0.001672	7.9e-05	8.09867	0.919755	606.037
P76172 - 2	156.5	2.2	1.46738	0.00012	1.88695	0.00012	0.282925	4.3e-05	0.001139	3.7e-05	8.31256	1.52112	589.043
P76172 - 3	153.9	3.6	1.46738	0.00014	1.88688	6.7e-05	0.282915	3e-05	0.001048	1.8e-05	7.91213	1.06124	612.554
P76172 - 4	159.2	4.5	1.46728	9.3e-05	1.88697	0.00011	0.282912	2.9e-05	0.000997	2.5e-05	7.92574	1.02588	615.89
P76172 - 5	153.4	3.5	1.46744	0.00011	1.88685	9.3e-05	0.282952	3.3e-05	0.001124	5.9e-05	9.20249	1.16736	529.706
P76172 - 6	158.7	4.7	1.46737	0.00016	1.88696	9.4e-05	0.282909	5.2e-05	0.00176	0.00013	7.72872	1.8395	628.071
P76172 - 7	150.4	2.6	1.46737	0.00014	1.88691	9.6e-05	0.282945	3e-05	0.001526	3.1e-05	8.85029	1.06123	549.843
P76172 - 8	167.5	6.4	1.46742	0.00015	1.88702	9.2e-05	0.282924	4.4e-05	0.001009	1.6e-05	8.52834	1.55653	583.984
P76172 - 9	163.5	4.7	1.4674	0.00017	1.88696	8.9e-05	0.282908	3.6e-05	0.001078	1.4e-05	7.86843	1.27351	622.96
P76172 - 10	156.2	3.5	1.46738	0.00012	1.88703	0.00013	0.282931	3.8e-05	0.001669	2.1e-05	8.4636	1.34424	579.156
P76172 - 11	156	2.9	1.46739	0.00014	1.88695	9e-05	0.282942	3.3e-05	0.0009958	8.4e-06	8.91795	1.16737	549.961
P76172 - 12	158	3.4	1.46741	0.0001	1.88689	0.00011	0.282974	3.1e-05	0.000983	3.1e-05	10.0945	1.09662	476.281
P76172 - 13	157.4	3.3	1.46746	0.0002	1.8869	0.00012	0.282931	4.8e-05	0.00167	0.00015	8.4889	1.698	578.492
P76172 - 14	155.9	3.1	1.46739	0.00012	1.8869	9.4e-05	0.282919	4.1e-05	0.001	1.3e-05	8.10173	1.45037	602.033
P76172 - 15	160	3.7	1.46737	0.00013	1.88696	0.0001	0.282883	3.7e-05	0.001267	1.6e-05	6.88858	1.30888	682.707
P76172 - 16	158.2	4.1	1.4675	0.00013	1.88703	0.00011	0.282944	3.9e-05	0.001045	4.5e-05	9.03111	1.37962	544.471
P76172 - 17	154.5	3.5	1.46744	0.00015	1.88694	8.9e-05	0.282962	3.5e-05	0.0012397	7.5e-06	9.5681	1.23811	507.193
P76172 - 18	161.7	4.1	1.4674	0.00013	1.88694	9.1e-05	0.282914	3.7e-05	0.00101	5.6e-05	8.04914	1.30888	609.993
P76172 - 19	154.3	4.7	1.46737	0.00015	1.88686	9e-05	0.282938	4.2e-05	0.00098	2.1e-05	8.74132	1.48574	559.902
P76172 - 20	150.3	3.9	1.46737	0.00012	1.88695	0.00012	0.282911	3.9e-05	0.0009969	2.1e-06	7.69803	1.3796	623.366
P75293
P75293 - 1	337.9	5.9	1.46726	0.00014	1.88703	0.00012	0.282783	5e-05	0.002699	9.7e-05	6.84986	1.76946	826.262
P75293 - 2	335.7	4.7	1.46738	0.00015	1.88686	0.00011	0.282744	5.2e-05	0.002131	3.9e-05	5.55083	1.84023	907.316
P75293 - 3	343.6	5	1.46735	0.00017	1.88707	0.00011	0.282768	4.9e-05	0.002321	1.6e-05	6.52231	1.73409	851.67
P75293 - 4	320.1	4.6	1.46739	0.00017	1.88693	9.2e-05	0.282732	3.2e-05	0.001865	2.8e-05	4.85607	1.13241	939.177
P75293 - 5	327.1	4.1	1.46737	0.00011	1.88699	0.00011	0.282738	3.9e-05	0.001705	9.1e-06	5.25082	1.38014	919.601
P75293 - 6	336.4	5.2	1.46736	0.00012	1.88685	0.00011	0.28272	4e-05	0.001188	1.1e-05	4.9264	1.41556	947.625
P75293 - 7	319.8	4.3	1.46734	0.00011	1.88701	0.0001	0.28267	4.1e-05	0.002281	5.5e-05	2.56754	1.4509	1084.37
P75293 - 8	332	5.4	1.46738	0.00011	1.88706	0.00011	0.282718	4.4e-05	0.001666	5.9e-05	4.65559	1.5571	961.369
P75293 - 9	313.9	4.4	1.46738	0.00011	1.88693	0.0001	0.28274	4e-05	0.001788	1.3e-05	5.02436	1.41549	923.551
P75293 - 10	337.9	4.3	1.46742	0.00013	1.88685	0.00012	0.282702	4.3e-05	0.003861	6.7e-05	3.72309	1.52173	1025.34
P75293 - 11	337.2	5.7	1.46733	0.00014	1.88693	8.3e-05	0.28276	4.4e-05	0.00201	0.0001	6.1755	1.55712	868.705
P75293 - 12	326.9	9.7	1.46717	0.00017	1.887	0.00013	0.282777	4.5e-05	0.002668	7.7e-05	6.4181	1.59247	845.076
P75293 - 13	334.6	5.6	1.46727	0.00013	1.8869	7.2e-05	0.282743	3.8e-05	0.001727	6.9e-05	5.58201	1.34478	904.458
P75293 - 14	339.7	5.6	1.46742	0.00014	1.88693	0.0001	0.282746	5.1e-05	0.00161	0.00013	5.82266	1.80485	893.171
P75293 - 15	329.7	9	1.46695	0.00013	1.88706	0.00012	0.282785	3.3e-05	0.001219	6.2e-05	7.07544	1.16782	805.372
P75293 - 16	344.1	7.6	1.46724	0.00012	1.88698	0.00014	0.282782	3.7e-05	0.00284	0.00019	6.9098	1.30942	827.353
P75293 - 17	353.8	9.1	1.46731	0.00012	1.887	0.00011	0.282754	3.5e-05	0.000867	3.4e-05	6.5802	1.23866	856.063
P75293 - 18	331.5	3.8	1.46743	0.0001	1.88698	9.2e-05	0.282737	2.8e-05	0.001873	4.4e-05	5.27187	0.990882	921.75
P75293 - 19	366.4	8	1.46732	0.00014	1.88684	0.00013	0.282764	3.2e-05	0.001548	1.7e-05	7.04322	1.13253	836.514
P75293 - 20	334.1	3.9	1.4673	9.6e-05	1.88687	9.7e-05	0.282765	3.7e-05	0.001634	2e-05	6.37055	1.30939	853.815
P75293 - 21	339	10	1.46734	0.00014	1.88697	0.00012	0.282776	2.6e-05	0.001042	1.4e-05	6.99707	0.920121	817.743
P75290
P75290 - 1	138	6	1.46731	0.00014	1.88692	0.00011	0.282919	3.7e-05	0.0006677	4.1e-06	7.74529	1.30882	610.589
P75290 - 2	140.9	8.4	1.46743	0.00014	1.88693	0.00014	0.282933	2.9e-05	0.000642	1.3e-05	8.30621	1.02584	577.072
P75290 - 3	137.9	5.4	1.46739	0.00014	1.88687	9.9e-05	0.282919	2.7e-05	0.0006654	2.6e-06	7.74332	0.955082	610.636
P75290 - 4	142.2	8	1.46746	0.00011	1.88705	0.00011	0.282903	3.3e-05	0.0005513	2.4e-06	7.28192	1.16733	643.493
P75290 - 5	135	5.2	1.46738	0.00016	1.8871	0.00011	0.282925	3.6e-05	0.0007297	5.8e-06	7.88653	1.27343	599.192
P75290 - 6	138.5	7.2	1.46731	0.00015	1.88686	9.2e-05	0.282882	3.4e-05	0.0006958	6.1e-06	6.44481	1.2027	693.938
P75290 - 7	135.2	7.8	1.4673	0.00012	1.8869	0.00013	0.282907	2.7e-05	0.0007097	3.5e-06	7.25596	0.955076	639.595
P75290 - 8	133.3	6.5	1.46736	0.00011	1.88695	9.6e-05	0.282913	4.5e-05	0.0006841	3.4e-06	7.42905	1.59179	627.043
P75290 - 9	137.5	7.7	1.46737	0.00011	1.88693	0.00012	0.282902	3.4e-05	0.0006924	5.4e-06	7.13079	1.20269	649.405
P75290 - 10	132.6	5.5	1.46736	0.00015	1.88708	9.1e-05	0.282849	3.2e-05	0.000977	1.2e-05	5.12423	1.13194	773.357
P75290 - 11	135.1	6.5	1.46739	0.00012	1.88707	9.6e-05	0.2829	3.5e-05	0.0007814	2.3e-06	6.99976	1.23806	655.858
P75290 - 12	144.9	7.6	1.46736	0.00014	1.88689	0.00011	0.282957	3.4e-05	0.0006474	8.5e-06	9.24204	1.20271	520.434
P75290 - 13	133.8	6.7	1.46732	0.0001	1.88696	7.9e-05	0.2829	3.9e-05	0.001022	1.4e-05	6.95021	1.37955	657.986
P75290 - 14	137.1	6.6	1.46726	0.00019	1.88696	9.2e-05	0.2829	4.5e-05	0.000891	1.7e-05	7.03332	1.5918	655.305
P75290 - 15	137.8	6.9	1.46734	0.00014	1.88698	9e-05	0.282897	3.9e-05	0.000782	1.3e-05	6.9523	1.37956	661.027
P75290 - 16	144.8	6.2	1.46734	0.00015	1.88702	0.00011	0.282876	3.3e-05	0.0006963	3.1e-06	6.36988	1.16734	703.713
P75290 - 17	135.8	9	1.46735	0.00013	1.8869	0.00012	0.282917	3.3e-05	0.000631	3.8e-05	7.62983	1.16732	616.213
P75290 - 18	143	6.5	1.46733	0.00013	1.88699	0.00011	0.282889	3.3e-05	0.000727	1.5e-05	6.78759	1.16734	675.657
P75290 - 19	137.9	7.2	1.4674	0.00014	1.88699	9.8e-05	0.282885	3.2e-05	0.000886	1.5e-05	6.52051	1.13195	688.637
P75290 - 20	141.7	5.6	1.46732	0.00015	1.88696	0.0001	0.282896	2.3e-05	0.000654	2.2e-05	7.01373	0.813595	660.204
P51298
P51298 - 1	124.3	6.2	1.46725	0.00014	1.88701	0.0001	0.282864	2.7e-05	0.0003124	4.3e-06	5.53009	0.955053	740.935
P51298 - 2	122.4	3.5	1.46732	0.00014	1.88695	0.00011	0.282854	3.8e-05	0.000796	8.4e-05	5.09535	1.34414	767.098
P51298 - 3	121.8	3.7	1.4673	0.00018	1.88681	0.0001	0.282856	3.5e-05	0.00043	1.8e-05	5.18253	1.23802	761.074
P51298 - 4	123.4	4.3	1.4673	0.00019	1.8869	9.7e-05	0.282833	3.7e-05	0.0004355	2e-06	4.40367	1.30877	811.887
P51298 - 5	119.5	5.7	1.46736	0.00015	1.88703	8.8e-05	0.282806	3.4e-05	0.0003409	2.7e-06	3.37045	1.20265	874.442
P51298 - 6	121.1	3.9	1.46726	0.00014	1.88692	8.7e-05	0.282862	2.7e-05	0.0004018	2.8e-06	5.38165	0.955046	747.845
P51298 - 7	124.6	4.4	1.46732	0.00012	1.88693	0.00011	0.282834	3.4e-05	0.0004063	9.7e-06	4.4678	1.20266	808.762
P51298 - 8	121.6	5.5	1.46732	0.00017	1.88692	0.0001	0.282824	2.8e-05	0.000403	1.7e-05	4.0484	0.990419	833.041
P51298 - 9	123.2	5.3	1.46727	0.00017	1.88695	0.00012	0.282854	3.9e-05	0.000618	2.2e-05	5.12723	1.37952	765.705
P51298 - 10	131.7	5.7	1.46726	0.00018	1.88689	0.00012	0.282863	5.3e-05	0.0008022	3.7e-06	5.61523	1.87476	741.389
P51298 - 11	118.8	2.1	1.4673	0.00016	1.88695	8.7e-05	0.282877	3.6e-05	0.00022235	6.9e-07	5.87575	1.27339	714.559
P51298 - 12	118.4	5	1.46729	0.00014	1.887	7.3e-05	0.282856	3.7e-05	0.000262	1.8e-05	5.121	1.30876	762.291
P51298 - 13	127.1	6.5	1.46734	0.00016	1.88695	0.00012	0.282865	3.1e-05	0.0002588	5.1e-06	5.6317	1.09655	736.689
P51298 - 14	123	5.5	1.46736	0.00011	1.88695	0.00013	0.282845	3.9e-05	0.0003843	2.8e-06	4.82352	1.37952	784.869
P51298 - 15	125.1	4.9	1.46728	0.00012	1.88702	0.00011	0.282854	2.9e-05	0.0002904	1.3e-06	5.19583	1.0258	762.847
P51298 - 16	128.3	5	1.46722	0.00016	1.8869	0.00011	0.282837	3.4e-05	0.0003773	5.8e-06	4.65772	1.20267	799.622
P51298 - 17	127.2	3.6	1.46732	0.00012	1.88687	0.0001	0.282889	3.1e-05	0.0003166	3.3e-06	6.47799	1.09655	682.855
P51298 - 18	126.8	6.8	1.46726	0.00015	1.887	0.0001	0.282885	2.9e-05	0.000422	3.4e-05	6.31885	1.0258	692.68
P51298 - 19	122.8	5.3	1.46726	0.00013	1.88691	6.6e-05	0.282832	4e-05	0.0002877	3.3e-06	4.36712	1.41489	813.734
P51298 - 20	125.5	4.2	1.46728	0.00014	1.88693	0.00012	0.282882	3.7e-05	0.000595	6.6e-05	6.1698	1.30878	701.145
P51298 - 21	122.2	5.6	1.46726	0.00016	1.88695	0.00011	0.282805	3.6e-05	0.000501	2.8e-05	3.3816	1.2734	875.878
OU49230
OU49230 - 1	146.9	2.5	1.4673	0.00012	1.88698	0.0001	0.282861	2.7e-05	0.001491	1.4e-05	5.80785	0.955101	741.187
OU49230 - 2	155.5	5.2	1.46721	0.00015	1.88693	0.00013	0.282893	4.1e-05	0.002318	6.9e-05	7.03779	1.45037	669.62
OU49230 - 3	148.6	3.2	1.46728	0.00015	1.88685	9.8e-05	0.282877	3.8e-05	0.0014	0.00011	6.41895	1.34422	703.601
OU49230 - 4	149.2	4.2	1.46736	0.00011	1.88695	8.8e-05	0.282849	2.7e-05	0.000993	3.1e-05	5.48144	0.955106	763.797
OU49230 - 5	149.9	5	1.46729	0.00014	1.887	0.00011	0.282807	3e-05	0.0009602	6.7e-06	4.01409	1.06123	857.688
OU49230 - 6	150.3	4	1.46731	0.00018	1.88678	0.00012	0.282863	3.9e-05	0.001311	5.7e-05	5.96884	1.3796	733.631
OU49230 - 7	150	3.3	1.46728	0.00015	1.88683	8.8e-05	0.282863	3.8e-05	0.001333	1.5e-05	5.96024	1.34422	733.941
OU49230 - 8	154	8.2	1.46716	0.00015	1.887	0.00014	0.282857	3.6e-05	0.000791	7.6e-05	5.88873	1.27349	741.67
OU49230 - 9	154.9	3.9	1.46734	0.00014	1.88692	0.00012	0.282836	3.6e-05	0.00122	1.1e-05	5.12148	1.27349	791.232
OU49230 - 10	144.3	3.3	1.46719	0.00014	1.88683	0.00012	0.282912	3.3e-05	0.001214	7.3e-05	7.58304	1.16734	625.945
OU49230 - 11	149.3	4.5	1.46738	0.00012	1.8869	9.1e-05	0.282852	2.8e-05	0.001257	4.9e-05	5.56366	0.99048	758.642
OU49230 - 12	142.8	4.6	1.46735	0.0002	1.88693	0.00012	0.282892	4.2e-05	0.001185	3e-05	6.8461	1.4857	671.767
OU49230 - 13	148.3	2.8	1.46717	0.00011	1.88695	8.7e-05	0.282791	4.2e-05	0.00122	2.1e-05	3.38803	1.48572	896.192
OU49230 - 14	148.1	2.9	1.46724	0.00015	1.8869	0.0001	0.282883	4.3e-05	0.001406	1.1e-05	6.61994	1.52109	690.393
OU49230 - 15	141.5	5	1.46728	0.00016	1.88692	9.3e-05	0.282856	3.5e-05	0.000873	1.8e-05	5.57392	1.23808	751.797
OU49230 - 16	147.7	3	1.46733	0.00013	1.88698	9.5e-05	0.282874	3.6e-05	0.001583	3.2e-05	6.27575	1.27347	712.013
OU49230 - 17	159.4	5.1	1.46731	0.00018	1.88692	0.0001	0.282876	3.4e-05	0.001173	3.2e-05	6.63801	1.20275	698.208
OU49230 - 18	151.8	6.5	1.46719	0.00017	1.88682	0.00011	0.282861	3.1e-05	0.000802	1.5e-05	5.98129	1.09661	734.028
OU49230 - 19	162.5	5.1	1.46723	0.00015	1.8869	9.6e-05	0.282874	4e-05	0.001267	3.7e-05	6.62379	1.41501	701.574
OU49230 - 20	150.8	4.2	1.46719	0.00016	1.88691	0.00012	0.28287	4.9e-05	0.00271	0.00012	6.08763	1.73335	726.46
OU49230 - 21	152	3.8	1.46728	0.00013	1.88691	0.00011	0.282882	4.8e-05	0.001635	3.4e-05	6.64476	1.69798	691.906
OU49230 - 22	150.3	3.5	1.46727	0.00011	1.88686	0.00013	0.282874	3.6e-05	0.001321	4.2e-05	6.35696	1.27348	708.901
OU49230 - 23	151.4	3.8	1.46732	0.00013	1.88696	0.00011	0.282875	3.3e-05	0.0012107	5e-06	6.42691	1.16736	705.316
OU49230 - 24	155.2	4.3	1.46723	0.00012	1.88701	0.0001	0.282862	3.5e-05	0.00104	1.4e-05	6.06614	1.23812	731.321
OU49230 - 25	145.1	3.1	1.46718	0.0001	1.8869	6.8e-05	0.282855	3e-05	0.001362	1.2e-05	5.56969	1.06122	754.924
OU49126
OU49126 - 1	158.4	7.2	1.46741	0.00017	1.88693	8.6e-05	0.2829	2.9e-05	0.0005608	3.4e-06	7.52965	1.02588	640.539
OU49126 - 2	124.2	4	1.46731	0.00012	1.88695	9e-05	0.282906	3.3e-05	0.000537	3.6e-05	6.99508	1.16729	647.506
OU49126 - 3	124.4	4	1.46727	0.00014	1.88688	0.00012	0.282921	3.4e-05	0.0007641	4.5e-06	7.51137	1.20266	614.728
OU49126 - 4	130.8	3.8	1.46734	0.00015	1.88695	0.00011	0.282895	3.3e-05	0.000643	2.6e-05	6.74137	1.1673	668.922
OU49126 - 5	130.1	4.6	1.46723	0.00015	1.88686	0.0001	0.282886	2.3e-05	0.0006329	1.8e-06	6.4086	0.813574	689.579
OU49126 - 6	128.8	2.9	1.46728	0.00013	1.88689	9.6e-05	0.282911	2.7e-05	0.000721	1.4e-05	7.25703	0.955062	634.448
OU49126 - 7	128.1	3.6	1.46731	0.00016	1.88702	0.00011	0.282912	3.6e-05	0.000699	3.5e-05	7.27902	1.27341	632.49
OU49126 - 8	139	5.7	1.46734	0.00016	1.88694	0.0001	0.282916	3.7e-05	0.000562	1.2e-05	7.67071	1.30882	616.143
OU49126 - 9	148.4	3.1	1.46734	0.00011	1.88699	6.7e-05	0.282867	3e-05	0.000632	2.1e-05	6.13632	1.06123	721.453
OU49126 - 10	134	4	1.46723	0.00014	1.88686	9.7e-05	0.282968	3.5e-05	0.0005161	9.9e-06	9.40472	1.23806	501.382
OU49126 - 11	127.2	3.4	1.46732	0.00019	1.887	9.5e-05	0.282908	3.6e-05	0.0004855	3.8e-06	7.13587	1.27341	640.907
OU49126 - 12	128.8	3.8	1.46732	0.00011	1.88693	0.0001	0.282888	2.5e-05	0.000672	2.9e-05	6.44763	0.884317	686.06
OU49126 - 13	128.9	3.7	1.46726	0.00016	1.88687	6.6e-05	0.282925	3.3e-05	0.000693	1.8e-05	7.75681	1.1673	602.633
OU49126 - 14	125.2	2.9	1.46733	0.00016	1.88705	0.0001	0.28287	2.9e-05	0.000865	4.4e-05	5.71643	1.0258	729.786
OU49126 - 15	126.9	3.5	1.46729	0.00013	1.88692	9.5e-05	0.282896	2.7e-05	0.000553	2.3e-05	6.69915	0.955058	668.519
OU49126 - 16	131.1	4.4	1.46735	0.00014	1.88689	0.0001	0.282928	3e-05	0.000616	1.6e-05	7.91757	1.06119	594.116
OU49126 - 17	131	4.7	1.4673	0.00013	1.8869	0.00011	0.282877	3.7e-05	0.0005998	6.1e-06	6.11277	1.3088	709.144
OU49126 - 18	126.2	3.4	1.4673	0.00013	1.88695	8.7e-05	0.282899	3.1e-05	0.000672	2.6e-05	6.78001	1.09655	662.808
OU49126 - 19	125.7	3.8	1.46725	0.00014	1.88684	8.1e-05	0.282932	2.7e-05	0.000634	1.1e-05	7.93956	0.955056	588.427
OU49126 - 20	131.8	4.9	1.46723	0.00019	1.88681	0.00011	0.282914	3.7e-05	0.0005312	4.9e-06	7.44504	1.3088	624.833
OU49126 - 21	128	3.8	1.46728	0.00012	1.88688	8e-05	0.282904	3.5e-05	0.000722	5.2e-05	6.99191	1.23804	650.724
OU49126 - 22	130.1	3.6	1.46727	0.00014	1.88699	0.00012	0.282871	3.5e-05	0.000759	1.1e-05	5.86716	1.23805	724.075
P62455
P62455 - 1	318	16	1.46719	0.0001	1.88687	0.00011	0.282832	3.2e-05	0.00101	1.5e-05	8.53069	1.1324	703.168
P62455 - 2	284.7	9.7	1.46727	0.00012	1.88687	0.00012	0.282785	3.6e-05	0.001438	3.4e-05	6.06524	1.27386	834.108
P62455 - 3	287.3	9.2	1.46725	0.00016	1.88685	9.4e-05	0.282863	3.6e-05	0.001339	2.3e-05	8.8997	1.27387	655.245
P62455 - 4	294	10	1.46723	0.00013	1.88686	0.00013	0.282853	3.8e-05	0.001321	1.6e-05	8.69306	1.34466	673.766
P62455 - 5	346	25	1.46726	0.00016	1.88692	8e-05	0.282843	3.9e-05	0.001401	3.1e-05	9.43751	1.3802	667.366
P62455 - 6	293	11	1.46736	0.00015	1.88695	0.00011	0.282827	3.6e-05	0.001305	1.4e-05	7.75468	1.27388	732.924
P62455 - 7	313	10	1.46723	0.00014	1.88691	0.00013	0.282852	5e-05	0.002552	4.2e-05	8.81023	1.76936	681.335
P62455 - 8	292	11	1.46733	0.00015	1.8869	0.00011	0.282805	3.7e-05	0.0010179	1.8e-06	7.01026	1.30926	779.643
P62455 - 9	284.4	9.9	1.46729	0.00016	1.88692	0.0001	0.282796	4.6e-05	0.001254	2.7e-05	6.48273	1.62771	807.26
P62455 - 10	290	8.7	1.4673	0.00014	1.88689	0.00011	0.282818	4.1e-05	0.0011195	5.2e-06	7.40744	1.4508	752.713
P62455 - 11	295.4	9.3	1.46723	0.00018	1.88685	9.7e-05	0.282823	4.3e-05	0.001251	1.8e-05	7.67523	1.52159	739.9
P62455 - 12	289	11	1.46727	0.00011	1.88688	0.00012	0.28282	3.2e-05	0.001221	2.3e-05	7.43719	1.13233	750.022
P62455 - 13	291.6	8.9	1.46723	0.00017	1.88697	0.00015	0.282785	4.8e-05	0.001593	4.2e-05	6.1828	1.6985	832.088
P62455 - 14	293.1	9.2	1.46731	0.00014	1.88688	0.00014	0.282745	4.5e-05	0.001207	3.5e-05	4.87423	1.59235	916.61
P62455 - 15	319	11	1.46741	0.00013	1.88684	0.00013	0.282789	3.8e-05	0.00183	3.9e-05	6.85736	1.34473	810.802
P62455 - 16	279.3	6	1.46729	0.00011	1.88685	0.00013	0.282913	5.2e-05	0.002857	7.2e-05	10.2165	1.84	564.641
P62455 - 17	283.3	6.4	1.46699	0.00016	1.88698	0.00011	0.282789	4.7e-05	0.002322	5.1e-05	6.01097	1.66309	836.456
P62455 - 18	309	15	1.46711	0.00013	1.88701	0.00012	0.28277	6.2e-05	0.002552	4e-05	5.8259	2.19399	868.626
P62455 - 19	307	11	1.46732	0.00017	1.88691	0.00011	0.282795	4.7e-05	0.00092	2.3e-06	7.00124	1.66318	792.11
P62455 - 20	306	11	1.46723	0.00015	1.88704	0.00013	0.282805	3.8e-05	0.0014731	5.6e-06	7.22124	1.34469	777.281
P62455 - 21	296.6	8.6	1.46739	0.00014	1.88682	0.00011	0.282781	4.7e-05	0.001919	1.4e-05	6.08357	1.66314	842.376
P62455 - 22	349	20	1.46728	0.00015	1.88689	0.00013	0.282801	4.2e-05	0.001418	4.2e-05	8.01149	1.48638	760.91
P62455 - 23	299	12	1.46733	0.00015	1.88695	0.00012	0.282843	3.9e-05	0.001108	4.7e-05	8.48871	1.38006	690.791
P62078
P62078 - 1	180	4.8	1.46732	0.00017	1.8868	0.00012	0.282932	4.2e-05	0.0007568	4.3e-06	9.11157	1.48582	556.618
P62078 - 2	175.6	6	1.46721	0.00012	1.88683	0.00011	0.282887	4.5e-05	0.000815	3e-05	7.41702	1.59194	661.373
P62078 - 3	175.2	4.5	1.46725	0.00012	1.88687	0.00013	0.282937	3.5e-05	0.001078	3.7e-05	9.14666	1.23817	550.568
P62078 - 4	176	6.7	1.46725	0.00011	1.88697	0.00012	0.282883	2.8e-05	0.0007414	2.7e-06	7.29278	0.990539	669.618
P62078 - 5	176	5.6	1.46722	0.00015	1.88688	0.00012	0.28289	3.5e-05	0.001128	1.6e-05	7.4954	1.23817	656.689
P62078 - 6	169.9	4.5	1.46714	9.8e-05	1.88692	8.5e-05	0.282911	3.5e-05	0.001455	2.7e-05	8.0702	1.23816	615.154
P62078 - 7	172.3	4.7	1.46731	0.00012	1.88698	8.7e-05	0.282949	4.1e-05	0.001134	3.6e-05	9.50224	1.45042	525.525
P62078 - 8	172.5	6.3	1.46724	0.00012	1.88688	9.3e-05	0.282882	3.2e-05	0.0006461	8.4e-06	7.19202	1.13204	673.27
P62078 - 9	172.9	7.2	1.46731	0.00014	1.88691	9.2e-05	0.282915	3.5e-05	0.000547	1.4e-05	8.37951	1.23817	597.777
P62078 - 10	170.3	6.3	1.46714	0.00015	1.88692	0.00012	0.282914	4.9e-05	0.000676	1.6e-05	8.27261	1.73342	602.543
P62078 - 11	170.3	3.4	1.46732	0.00013	1.88695	0.00011	0.282937	3.6e-05	0.00193	0.00014	8.94499	1.27353	559.576
P62078 - 12	170.7	5.6	1.4673	0.00012	1.88709	9.9e-05	0.282872	3.5e-05	0.00064	1e-05	6.79962	1.23816	696.87
P62078 - 13	178.6	6.6	1.46729	0.00011	1.88688	0.00012	0.282896	3.3e-05	0.000598	2.6e-05	7.82628	1.16743	637.631
P62078 - 14	176.4	5.3	1.46719	0.00012	1.88683	9.4e-05	0.282906	3.4e-05	0.000588	1.5e-05	8.13306	1.2028	616.296
P62078 - 15	178.7	6.4	1.4672	0.00011	1.88695	0.0001	0.282936	2.9e-05	0.0004889	5.9e-06	9.25643	1.02592	546.324
P62078 - 16	173.6	5.3	1.4673	0.00016	1.88692	0.0001	0.282918	3.5e-05	0.000955	3.7e-05	8.45412	1.23817	593.565
P62078 - 17	172.2	5.4	1.46728	0.00012	1.88694	0.00011	0.282903	3.1e-05	0.000495	2.2e-05	7.94558	1.09666	624.937
P62078 - 18	178	6.6	1.46734	0.00013	1.88701	0.0001	0.282907	3.4e-05	0.0005794	4.8e-06	8.20448	1.2028	613.003
P62078 - 19	175.6	4.5	1.46719	8.8e-05	1.88698	0.00011	0.282874	2.9e-05	0.000641	7.2e-05	6.97734	1.02591	689.424
P62078 - 20	175.6	6.1	1.46728	0.00013	1.88684	0.00011	0.282899	3.4e-05	0.000319	9.2e-06	7.89916	1.2028	630.598
OU49118
OU49118 - 1	162.4	3.1	1.46729	0.00011	1.88684	8e-05	0.282741	4e-05	0.001061	2.3e-05	1.93886	1.41501	999.34
OU49118 - 2	159.4	5.2	1.46725	0.00014	1.88695	0.0001	0.282688	3.7e-05	0.0005879	2.5e-06	0.0491811	1.30888	1116.63
OU49118 - 3	165.3	6.3	1.46729	0.00013	1.88697	0.00011	0.282719	4e-05	0.000849	4e-05	1.2463	1.41502	1045.53
OU49118 - 4	161.1	3.5	1.46711	0.00015	1.88702	0.00013	0.28279	4.7e-05	0.00247	0.00025	3.49407	1.66264	899.618
OU49118 - 5	157.8	5.1	1.46733	0.00015	1.8869	0.0001	0.282717	4.1e-05	0.00129	7.4e-05	0.966787	1.45037	1057.28
OU49118 - 6	165.4	4.8	1.46732	0.00018	1.88697	0.00012	0.282659	3.9e-05	0.0007479	2.7e-06	-0.862998	1.37965	1179.06
OU49118 - 7	160.3	5.1	1.46719	0.00013	1.8869	0.00012	0.282701	3.9e-05	0.000665	7.4e-06	0.520565	1.37963	1087.51
OU49118 - 8	163.9	5.1	1.46726	0.00015	1.88695	0.00013	0.282707	4.2e-05	0.0005802	1.2e-06	0.82056	1.48577	1071.38
OU49118 - 9	163.7	7	1.46717	0.00014	1.88695	0.00012	0.282772	4.4e-05	0.0007628	8.9e-06	3.09582	1.55652	926.972
OU49118 - 10	170.2	8.6	1.46728	0.00013	1.88686	0.00012	0.282753	3.5e-05	0.000996	1.1e-05	2.53887	1.23816	967.478
OU49118 - 11	160.4	5.1	1.46732	0.00012	1.88681	0.00012	0.282733	3.4e-05	0.0008107	3.3e-06	1.63929	1.20276	1016.74
OU49118 - 12	161.9	4.6	1.46731	0.00012	1.88691	0.00011	0.282734	3.2e-05	0.0007192	4.7e-06	1.71705	1.13201	1013
OU49118 - 13	163.9	3.1	1.46729	0.00012	1.8869	0.00013	0.282682	2.8e-05	0.001146	6.6e-05	-0.125167	0.990512	1131.23
OU49118 - 14	162.6	4.8	1.46722	0.00012	1.88694	8.6e-05	0.282722	3.2e-05	0.000728	1.2e-05	1.30685	1.13201	1039.55
OU49118 - 15	166.5	8.2	1.46727	0.00015	1.88687	0.00012	0.282705	3.2e-05	0.0006966	3.8e-06	0.793871	1.13202	1075.14
OU49118 - 16	169.6	4	1.46727	0.00012	1.88692	0.00013	0.282684	3.4e-05	0.000757	6.1e-06	0.111786	1.20278	1120.77
OU49118 - 17	162.8	4	1.46724	0.00011	1.88687	0.00012	0.282723	3.5e-05	0.0007512	7e-06	1.34409	1.23814	1037.35
OU49118 - 18	1483	15	1.46739	0.00014	1.88689	9.8e-05	0.282153	4.6e-05	0.00304	0.00014	8.01712	1.63212	1656.18
OU49118 - 19	167.5	5.6	1.46732	0.00013	1.88691	0.00012	0.282632	4.6e-05	0.000829	3.7e-05	-1.78143	1.62728	1238.73
OU49118 - 20	327	10	1.46706	0.00018	1.88686	0.00011	0.282667	4.2e-05	0.0005653	3.9e-06	2.98312	1.48631	1063.7
P75283
P75283 - 1	133.6	3.6	1.46744	0.00018	1.88697	0.00014	0.282871	5.3e-05	0.00267	0.00053	5.77449	1.87477	732.756
P75283 - 2	134.1	2.7	1.46735	0.00013	1.88696	7.6e-05	0.282794	6.3e-05	0.00613	0.00031	2.7542	2.2285	925.154
P75283 - 3	135.5	4.7	1.46722	0.00019	1.88702	0.00013	0.282845	4.1e-05	0.002573	7.4e-05	4.90241	1.4503	789.773
P75283 - 4	138.7	5.1	1.46729	0.00018	1.88695	0.00014	0.282885	5.9e-05	0.00258	9.1e-05	6.38248	2.08703	698.069
P75283 - 5	134.6	3.4	1.46729	0.00015	1.88684	0.00013	0.28286	6.3e-05	0.00415	0.00026	5.27415	2.22851	765.404
P75283 - 6	129.4	2.9	1.46727	0.00015	1.887	0.00011	0.282871	5e-05	0.00438	0.00017	5.54212	1.76864	744.218
P75283 - 7	133.7	3.1	1.46739	0.00014	1.88699	8.9e-05	0.282948	4.1e-05	0.002579	9.7e-05	8.50831	1.4503	558.449
P75283 - 8	138	3.9	1.4672	0.00016	1.88701	0.00014	0.28289	4.2e-05	0.00296	9.9e-05	6.51028	1.48568	689.368
P75283 - 9	130.2	3.5	1.46727	0.00012	1.88702	0.00012	0.282849	6.7e-05	0.00535	0.00037	4.6959	2.36998	798.702
P75283 - 10	131	3.3	1.46728	0.00013	1.88703	9.7e-05	0.282886	4.6e-05	0.003365	8.6e-05	6.19161	1.62715	704.121
P75283 - 11	133	2.9	1.46721	0.00012	1.88688	0.00012	0.282939	4.5e-05	0.0042	0.00032	8.033	1.59179	588.253
P75283 - 12	130.4	3.1	1.46723	0.00015	1.88695	0.00016	0.282885	4.6e-05	0.0045	0.00034	6.04635	1.62715	712.899
P75283 - 13	132.6	3.1	1.46742	0.00017	1.887	0.00011	0.282838	6.6e-05	0.004163	9.9e-05	4.45578	2.33462	815.877
P75283 - 14	132.5	2.7	1.4672	0.00014	1.88688	0.00011	0.282885	6.9e-05	0.0062	0.00041	5.93789	2.44073	721.475
P75283 - 15	132.5	2.4	1.46728	0.00012	1.88697	9.9e-05	0.282844	5.1e-05	0.004893	6.8e-05	4.60211	1.80402	806.493
P75283 - 16	134	3.4	1.46734	0.00012	1.88684	0.00013	0.282831	5e-05	0.0031	0.00011	4.32966	1.76865	825.008
P75283 - 17	135.1	3.5	1.4672	0.00013	1.8871	0.00011	0.282875	4.2e-05	0.001138	9.5e-05	6.08358	1.48567	714.258
P75283 - 18	132.1	3.1	1.46718	0.00012	1.88694	0.00014	0.282944	7.1e-05	0.00552	0.00018	8.07703	2.51148	584.727
P75283 - 19	136.7	5.6	1.46731	0.00016	1.88688	0.0001	0.28287	5e-05	0.00133	0.00012	5.92377	1.76866	725.708
P75283 - 20	139.5	5.9	1.46719	0.00013	1.88691	9.8e-05	0.282879	3.4e-05	0.00113	5.4e-05	6.32044	1.2027	702.658
P63993
P63993 - 1	127.6	5.7	1.46721	0.00014	1.88687	0.00011	0.282861	3.4e-05	0.0005238	7.5e-06	5.4789	1.20267	746.814
P63993 - 2	120.2	6.7	1.46733	0.00018	1.88688	0.00011	0.28287	3.1e-05	0.0004368	2.4e-06	5.64205	1.09653	730.552
P63993 - 3	127.8	6.9	1.46727	0.00015	1.88695	9.6e-05	0.282877	3.5e-05	0.00046959	6.6e-07	6.05382	1.23804	710.36
P63993 - 4	126.7	4.4	1.46734	0.00016	1.88686	9.4e-05	0.282874	3e-05	0.0004048	2.9e-06	5.92899	1.06118	717.438
P63993 - 5	128.2	7.1	1.46736	0.00012	1.88685	0.00012	0.282882	3.6e-05	0.0004865	8.7e-06	6.23803	1.27341	698.941
P63993 - 6	131	5.5	1.46732	0.00015	1.88691	9.2e-05	0.282852	3.3e-05	0.0006509	1.7e-06	5.22402	1.1673	765.736
P63993 - 7	123.3	5.7	1.4673	0.00013	1.88705	9.7e-05	0.28288	2.8e-05	0.0003905	1.6e-06	6.06764	0.990423	705.908
P63993 - 8	124.8	4.7	1.46714	0.00013	1.88703	0.00011	0.282868	3.6e-05	0.000554	5.1e-06	5.66267	1.2734	732.891
P63993 - 9	133.4	4.3	1.4671	0.00013	1.88686	8e-05	0.282874	3.2e-05	0.0003552	3.1e-06	6.08069	1.13194	713.093
P63993 - 10	128.8	5.2	1.46728	0.00014	1.88698	0.00012	0.282885	3.5e-05	0.000484	2.6e-05	6.35752	1.23804	691.803
P63993 - 11	129	6.1	1.46727	0.00014	1.88681	9.3e-05	0.282898	2.8e-05	0.0004117	2.1e-06	6.82792	0.990435	661.975
P63993 - 12	124.1	4.9	1.46727	0.00015	1.88693	0.00012	0.282851	3.9e-05	0.0007165	7.2e-06	5.03269	1.37952	772.435
P63993 - 13	125.6	5.3	1.46715	0.00014	1.88692	8.1e-05	0.282891	3.4e-05	0.0004377	4.6e-06	6.50341	1.20266	679.965
P63993 - 14	127.1	5.6	1.46727	0.00012	1.88686	0.00011	0.282868	3.7e-05	0.0005825	5.1e-06	5.71062	1.30878	731.664
P63993 - 15	134.5	5.6	1.46725	0.00016	1.88688	8.5e-05	0.282873	3e-05	0.0004269	2.8e-06	6.06317	1.06119	715.082
P63993 - 16	122.6	8.1	1.46731	0.00017	1.88685	0.0001	0.282855	3.6e-05	0.0003451	6.6e-06	5.17162	1.2734	762.404
P63993 - 17	128.9	6.3	1.4673	0.00015	1.88695	0.00011	0.282845	3.1e-05	0.0004145	9.8e-06	4.95073	1.09655	781.46
P63993 - 18	137.1	7.8	1.46722	0.00014	1.88701	0.00016	0.282829	3.4e-05	0.0004112	2e-06	4.56531	1.20269	812.485
P63993 - 19	130.5	6.7	1.46722	0.00014	1.887	9.1e-05	0.282893	3e-05	0.0003778	1.3e-06	6.68696	1.06118	672.153
P63993 - 20	128.2	4.4	1.46727	0.00016	1.8868	8e-05	0.282866	3.8e-05	0.0003983	3.3e-06	5.67954	1.34416	734.515
P63993 - 21	123	6	1.46729	0.00014	1.88688	0.0001	0.282844	3e-05	0.00040619	7.3e-07	4.78636	1.06117	787.232
P63993 - 22	128.5	6.5	1.46731	0.00012	1.88693	0.00012	0.282908	2.9e-05	0.0004293	1.9e-06	7.16916	1.02581	639.815
P65148
P65148 - 1	119.1	2.2	1.46724	0.00012	1.88693	9.2e-05	0.2827	3.8e-05	0.00142	1.1e-05	-0.472747	1.34413	1117.62
P65148 - 2	120.9	2.1	1.46727	0.00012	1.88691	0.0001	0.282706	3.3e-05	0.00093	1.8e-05	-0.183011	1.16728	1100.73
P65148 - 3	123	3.3	1.4672	0.00017	1.88694	9.1e-05	0.282697	4.5e-05	0.001067	9.2e-05	-0.467092	1.59175	1120.36
P65148 - 4	116.4	2.4	1.46726	0.00016	1.88689	0.00011	0.282622	3e-05	0.001487	4.9e-05	-3.2944	1.06115	1293.55
P65148 - 5	133.3	6.6	1.4673	0.00018	1.88705	0.00011	0.282666	3.5e-05	0.000924	2.2e-05	-1.32923	1.23806	1183.02
P65148 - 6	120.7	2.8	1.46718	0.00013	1.88687	0.00012	0.282697	3.8e-05	0.001752	5e-05	-0.571279	1.34414	1125.12
P65148 - 7	122.9	2.1	1.46743	0.00015	1.88697	8e-05	0.282662	3.9e-05	0.000911	2.6e-05	-1.6946	1.37952	1197.82
P65148 - 8	124.2	3.3	1.46731	0.00012	1.8869	0.00011	0.282681	2.8e-05	0.00066	1.8e-05	-0.973787	0.990425	1153.34
P65148 - 9	121.5	2.1	1.46727	0.00016	1.88702	9.8e-05	0.282657	4.3e-05	0.000985	4.8e-05	-1.90769	1.521	1210.16
P65148 - 10	119.6	2.2	1.46728	0.00016	1.88694	7.5e-05	0.282678	2.4e-05	0.001109	3.5e-05	-1.21569	0.848927	1164.96
P65148 - 11	122.2	2.7	1.46716	0.00018	1.88692	0.00012	0.282701	4.1e-05	0.001227	6e-05	-0.355756	1.45026	1112.69
P65148 - 12	113.5	3.3	1.46711	0.00018	1.88683	0.0001	0.28272	4.3e-05	0.001165	5.2e-05	0.134557	1.52097	1074.77
P65148 - 13	121.5	2.1	1.46735	0.00017	1.88681	8.5e-05	0.282665	3.6e-05	0.001193	1.1e-05	-1.64142	1.2734	1193.35
P65148 - 14	129.9	6.3	1.46722	0.00014	1.88684	8.6e-05	0.282519	6e-05	0.001305	1.7e-05	-6.63529	2.12237	1514.35
P65148 - 15	122.3	3.1	1.4673	0.00015	1.88695	9e-05	0.282632	3.6e-05	0.00136	0.0001	-2.80505	1.2734	1267.39
P65148 - 16	120.7	2.4	1.46735	0.00013	1.88692	9.6e-05	0.282613	3.6e-05	0.00154	0.0001	-3.52561	1.27339	1311.53
P65148 - 17	116.8	2	1.46728	0.00011	1.88687	8.6e-05	0.282668	4.3e-05	0.00201	0.00017	-1.69918	1.52098	1193.26
P65148 - 18	127.3	5.4	1.46741	0.00014	1.88689	8.3e-05	0.282689	3.5e-05	0.0007982	7.5e-06	-0.63485	1.23804	1134.38
P65148 - 19	419.4	8.1	1.46735	0.00014	1.88707	0.00012	0.282381	4.8e-05	0.001625	8.4e-05	-5.40302	1.69899	1666.88
P65148 - 20	116.4	2.2	1.4671	0.00017	1.88681	9.9e-05	0.282669	7.5e-05	0.00698	0.00087	-2.05463	2.65288	1215.38
P65148 - 21	124.7	2.2	1.46713	0.00014	1.88674	0.00012	0.282711	3.8e-05	0.001464	3.3e-05	0.0319963	1.34415	1090.15
P65148 - 22	120.1	1.8	1.46722	0.00017	1.88686	8.6e-05	0.282729	3.2e-05	0.0011165	6.8e-06	0.598437	1.1319	1050.66
OU49114
OU49114 - 1	125.2	5.7	1.46729	0.00015	1.88684	9.2e-05	0.282758	3.2e-05	0.0003953	4.6e-06	1.7936	1.13192	979.008
OU49114 - 2	126.8	5.6	1.46728	0.00016	1.88688	0.0001	0.28278	3.5e-05	0.000595	2.8e-05	2.59023	1.23804	929.762
OU49114 - 3	132.2	6.5	1.46715	0.00014	1.88687	8.9e-05	0.282797	3.7e-05	0.000633	6.2e-06	3.30627	1.3088	888.602
OU49114 - 4	127.8	5.3	1.46725	0.00017	1.88688	0.00014	0.282753	4.2e-05	0.0007731	2.1e-06	1.64197	1.48565	990.683
OU49114 - 5	121.7	6	1.4672	0.00014	1.88695	0.00012	0.282767	4.8e-05	0.0004062	1.8e-06	2.03413	1.69786	960.981
OU49114 - 6	139.5	8	1.46728	0.00015	1.88682	9.4e-05	0.282792	2.8e-05	0.0003538	1.6e-06	3.31455	0.990458	893.872
OU49114 - 7	127.1	9.1	1.46731	0.00014	1.8869	0.0001	0.282763	3.3e-05	0.0004236	1.1e-06	2.00986	1.16729	966.808
OU49114 - 8	123.6	6.6	1.46727	0.00013	1.88694	8.7e-05	0.282758	4.1e-05	0.000832	1.8e-05	1.72274	1.45026	982.229
OU49114 - 9	124.5	6.1	1.46728	0.00015	1.88687	9.7e-05	0.282732	3.6e-05	0.0004024	3.8e-06	0.857947	1.2734	1037.72
OU49114 - 10	121.4	5.2	1.46716	0.00014	1.88678	9.3e-05	0.282787	4.6e-05	0.0007141	5.8e-06	2.71027	1.62712	917.857
OU49114 - 11	134.7	7.9	1.4672	0.00017	1.88679	0.00011	0.282802	4e-05	0.000499	4e-05	3.54965	1.41493	875.13
OU49114 - 12	128.3	5.2	1.46723	0.00016	1.88704	0.0001	0.282791	3.8e-05	0.0004103	5.8e-06	3.02778	1.34416	903.186
OU49114 - 13	128.5	6.1	1.46725	0.00012	1.88693	0.00012	0.2828	4.1e-05	0.0007692	2.8e-06	3.32003	1.45028	884.79
OU49114 - 14	127.3	6.7	1.46728	0.00013	1.88698	0.0001	0.282773	3.9e-05	0.0004444	5.6e-06	2.36622	1.37953	944.369
OU49114 - 15	122.1	5.9	1.46734	0.00019	1.88695	0.00012	0.282758	4e-05	0.0008827	2.8e-06	1.68611	1.41489	983.359
OU49114 - 16	123.5	5.1	1.46731	0.00011	1.88698	0.00011	0.282758	2.7e-05	0.00068	1.2e-05	1.73298	0.955051	981.5
OU49114 - 17	125.4	5.8	1.46734	0.0001	1.88689	0.00011	0.282747	3.1e-05	0.0006534	7.1e-06	1.3875	1.09654	1004.9
OU49114 - 18	124.3	7.2	1.46723	0.00015	1.88689	8.3e-05	0.282802	3.3e-05	0.000567	1.4e-05	3.31609	1.16729	881.706
OU49114 - 19	124.8	5.2	1.46715	0.00013	1.88677	0.00011	0.282765	3.6e-05	0.0007504	1e-06	2.00311	1.2734	965.409
OU49114 - 20	135.4	7.9	1.46725	0.00018	1.88692	0.00012	0.282796	4.2e-05	0.0004958	6e-06	3.35304	1.48567	888.172
OU49114 - 21	122.5	7.1	1.46718	0.00018	1.88694	0.00011	0.282764	3.9e-05	0.0005784	8.3e-06	1.93165	1.37951	968.113
OU49114 - 22	126.9	5.9	1.46721	0.00014	1.88687	9e-05	0.282759	3.8e-05	0.000341	1.6e-05	1.8709	1.34416	975.459
P64865
P64865 - 1	130.1	5	1.46737	0.00016	1.88689	0.00013	0.282857	4.5e-05	0.00105	1.1e-05	5.34691	1.59177	757.2
P64865 - 2	127.9	3.2	1.4673	0.00013	1.88683	9.6e-05	0.282862	2.1e-05	0.000794	1.8e-05	5.49799	0.742825	745.837
P64865 - 3	128.9	5.6	1.4673	0.00014	1.887	0.00011	0.282894	4.3e-05	0.000588	1.3e-05	6.66921	1.52103	672.015
P64865 - 4	128.4	6.8	1.46728	0.00018	1.88698	0.00011	0.282885	3.5e-05	0.000595	1.3e-05	6.33932	1.23804	692.645
P64865 - 5	128.6	5.6	1.46726	0.00014	1.8869	0.00011	0.282891	3.5e-05	0.0005034	8.7e-06	6.56372	1.23804	678.502
P64865 - 6	130.3	3.7	1.46727	0.00016	1.88691	0.00012	0.282869	4e-05	0.0003644	2.5e-06	5.83477	1.41491	726.297
P64865 - 7	128.5	4.8	1.46723	0.00014	1.88692	0.00011	0.282877	3e-05	0.000765	1.8e-05	6.04408	1.06118	711.536
P64865 - 8	128.4	5.1	1.46729	0.00014	1.88693	0.00011	0.282835	3.2e-05	0.000381	1.3e-05	4.58886	1.13192	804.081
P64865 - 9	127.6	5.1	1.46725	0.00016	1.88704	0.00012	0.28287	3.7e-05	0.000863	5.5e-05	5.76863	1.30879	728.366
P64865 - 10	132.6	4	1.46724	0.00017	1.88695	0.00012	0.282837	4.9e-05	0.001327	1.7e-05	4.66907	1.73328	802.314
P64865 - 11	136.5	5.2	1.46723	0.00012	1.8869	0.00011	0.282878	2.9e-05	0.000709	2.2e-05	6.25853	1.02583	704.222
P64865 - 12	132.2	7	1.46711	0.00016	1.88696	0.0001	0.282867	3.6e-05	0.0005	2.2e-05	5.794	1.27343	730.402
P64865 - 13	136.2	6.1	1.46713	0.00018	1.88699	0.00014	0.282872	4e-05	0.0004705	2.4e-06	6.06123	1.41493	716.555
P64865 - 14	130.4	4.2	1.46722	0.00014	1.88678	0.00011	0.282834	3.2e-05	0.00079	3.6e-05	4.56222	1.13193	807.362
P64865 - 15	133.7	5	1.46723	0.00014	1.8869	0.00011	0.282876	3.2e-05	0.000753	7.4e-05	6.12288	1.13194	710.643
P64865 - 16	133	5.5	1.46719	0.00014	1.88697	9.7e-05	0.282859	3.7e-05	0.000545	1.5e-05	5.5246	1.3088	748.191
P64865 - 17	135.2	4.8	1.46735	0.00014	1.88691	9.6e-05	0.282864	3.6e-05	0.0006135	4.1e-06	5.74351	1.27343	735.998
P64865 - 18	134	5.5	1.46738	0.00013	1.88691	0.0001	0.282847	3.5e-05	0.0007334	7.5e-06	5.10532	1.23806	775.672
P64865 - 19	129.5	6.2	1.46725	0.00013	1.88695	0.0001	0.282872	3.6e-05	0.0007644	5.1e-06	5.88902	1.27342	722.207
P64865 - 20	132.7	5	1.46723	0.00022	1.88695	9.8e-05	0.282853	3.1e-05	0.0004423	5.2e-06	5.3148	1.09656	761.308
P64865 - 21	133	4.9	1.46727	0.00022	1.88695	9.4e-05	0.2829	4e-05	0.001021	2.3e-05	6.93303	1.41492	658.447
P64865 - 22	134.4	5.2	1.46725	0.00017	1.88689	0.00011	0.282875	2.7e-05	0.0006649	2.3e-06	6.11057	0.955074	711.983
P64865 - 23	129	4.8	1.46724	0.00012	1.88699	0.0001	0.282899	4.4e-05	0.000853	1.3e-05	6.82565	1.5564	662.12
P75062
P75062 - 1	375	20	1.46728	0.00016	1.88682	9.5e-05	0.282453	5.5e-05	0.00057	4.8e-05	-3.53699	1.94657	1514.19
P75062 - 2	113	3.7	1.46724	0.00013	1.88685	9.7e-05	0.282731	3.4e-05	0.0004259	9.6e-06	0.568122	1.20263	1046.94
P75062 - 3	119.1	4.7	1.46726	0.00014	1.88677	8.6e-05	0.282752	2.6e-05	0.000343	2.6e-05	1.4514	0.91967	995.85
P75062 - 4	113.4	2.8	1.46735	0.00017	1.88689	0.00013	0.282706	3.2e-05	0.0004645	9.5e-06	-0.310276	1.13189	1102.82
P75062 - 5	117.1	3.9	1.46729	0.00014	1.88701	0.00011	0.282712	3.4e-05	0.000365	1.6e-05	-0.00920598	1.20264	1086.72
P75062 - 6	114.6	4.5	1.46722	0.00013	1.88689	9.2e-05	0.282702	3.2e-05	0.0005847	5.2e-06	-0.434555	1.13189	1111.63
P75062 - 7	124.5	4.3	1.46734	0.00016	1.88689	0.00012	0.282806	4.2e-05	0.0005728	9.5e-06	3.46147	1.48564	872.632
P75062 - 8	113.8	5	1.46731	0.00015	1.88684	0.00011	0.282734	4.3e-05	0.0004139	9.4e-06	0.692704	1.52097	1039.69
P75062 - 9	119.7	4.5	1.46737	0.00014	1.88686	0.00011	0.28272	4.1e-05	0.000708	5.1e-05	0.303817	1.45025	1068.98
P75062 - 10	113.4	3.9	1.46738	0.00019	1.88713	8.2e-05	0.282669	3.8e-05	0.000586	1.7e-05	-1.62813	1.34412	1186.08
P75062 - 11	113.2	2.7	1.46731	0.00014	1.88701	0.00011	0.282703	3.9e-05	0.000618	2e-05	-0.432263	1.37949	1110.37
P75062 - 12	118.7	3.6	1.4673	0.00013	1.88695	0.00011	0.282698	2.8e-05	0.0004166	8e-06	-0.473267	0.990413	1117.34
P75062 - 13	118.5	2.8	1.46721	0.00011	1.88684	0.00011	0.282695	2.7e-05	0.000581	2.6e-05	-0.596655	0.95504	1124.98
P75062 - 14	120.8	4.2	1.46718	0.00013	1.88687	9.9e-05	0.282674	3.5e-05	0.000489	1.7e-05	-1.28186	1.23802	1170.09
P75062 - 15	117.8	5.9	1.46727	0.00016	1.8869	0.00012	0.282701	3.1e-05	0.0003098	3.6e-06	-0.3786	1.09653	1110.64
P75062 - 16	114.2	3.4	1.4672	0.00014	1.8869	0.00011	0.282727	3.1e-05	0.000476	3e-05	0.4492	1.09652	1055.42
P75062 - 17	113.1	4.8	1.46721	0.00017	1.88702	9.4e-05	0.28269	3e-05	0.000235	1e-05	-0.865638	1.06114	1137.68
P75062 - 18	126.8	6.8	1.46728	0.00016	1.88688	0.00011	0.282706	3.6e-05	0.0002901	2.9e-06	-0.00177549	1.27341	1093.96
P75062 - 19	128.4	5.3	1.46732	0.00015	1.88695	0.00012	0.28272	3.9e-05	0.0004728	9.7e-06	0.513212	1.37953	1062.64
P75062 - 20	112.1	4.5	1.46719	0.00018	1.88693	0.00011	0.282684	2.9e-05	0.000582	3.2e-05	-1.12566	1.02577	1153.32
OU81999
OU81999 - 1	121.7	4.6	1.46726	0.00013	1.88685	0.00012	0.282889	3.3e-05	0.00033	1.1e-05	6.35566	1.16728	686.286
OU81999 - 2	119.2	3.8	1.4674	0.00015	1.88703	0.0001	0.282836	3.1e-05	0.000474	5.6e-05	4.41451	1.09653	807.863
OU81999 - 3	122.1	5.1	1.46743	0.00012	1.88702	9.9e-05	0.28284	3.6e-05	0.000421	4.5e-05	4.62389	1.2734	796.851
OU81999 - 4	116.9	2.9	1.46727	0.00015	1.88695	9.3e-05	0.282905	4.2e-05	0.001497	4.6e-05	6.72565	1.48561	658.892
OU81999 - 5	121.4	4.7	1.46733	0.00015	1.88691	0.00011	0.282859	3.3e-05	0.000298	2.8e-05	5.29046	1.16728	753.888
OU81999 - 6	125.5	5.7	1.46725	0.00013	1.88688	0.0001	0.282831	3.1e-05	0.0003589	3.4e-06	4.3854	1.09654	814.716
OU81999 - 7	119.5	3.7	1.46724	0.00012	1.8868	0.00012	0.282859	3.2e-05	0.0007169	9.2e-06	5.21546	1.1319	757.153
OU81999 - 8	120.4	4.4	1.46725	0.00017	1.88675	0.00012	0.282893	4.1e-05	0.000726	1.6e-05	6.43698	1.45025	680.072
OU81999 - 9	121.6	5.1	1.46739	0.00015	1.88696	9.4e-05	0.282848	3.2e-05	0.0004428	6.1e-06	4.89413	1.13191	779.265
OU81999 - 10	118	5	1.46726	0.00012	1.88693	0.0001	0.282849	3.7e-05	0.0003816	3.8e-06	4.85524	1.30876	778.882
OU81999 - 11	120.5	5	1.4672	0.00014	1.88694	9.4e-05	0.282854	3.8e-05	0.000581	1.4e-05	5.0712	1.34414	767.126
OU81999 - 12	119.4	5	1.46726	0.00014	1.88687	0.00011	0.282866	4.5e-05	0.0004185	2e-06	5.48444	1.59174	739.952
OU81999 - 13	118.6	4.4	1.46733	0.00012	1.88696	0.00011	0.282846	4.1e-05	0.000587	3.3e-06	4.74621	1.45025	786.293
OU81999 - 14	134.8	9.3	1.46731	0.00017	1.88685	0.00014	0.282897	3.7e-05	0.000392	1.1e-05	6.92183	1.30881	660.59
OU81999 - 15	123.2	4.1	1.46737	0.00015	1.88703	8.9e-05	0.282833	3.3e-05	0.0004603	2.5e-06	4.39726	1.16728	812.136
OU81999 - 16	119.4	4.9	1.46729	0.00015	1.88698	7.1e-05	0.282887	3.4e-05	0.000482	3.3e-06	6.22224	1.20265	692.962
OU81999 - 17	120.4	3.7	1.46727	0.00018	1.887	0.00011	0.282886	4.7e-05	0.000826	2.1e-05	6.18142	1.66248	696.357
OU81999 - 18	121.4	3.8	1.46719	0.00011	1.88697	0.00012	0.282904	3e-05	0.0003517	8.5e-06	6.87789	1.06116	652.757
OU81999 - 19	118.9	4	1.4672	0.00017	1.88686	0.00012	0.282881	3.1e-05	0.000743	4.1e-05	5.97852	1.09653	708.092
OU81999 - 20	118.6	4.7	1.4672	0.00014	1.88697	9.7e-05	0.282856	4.2e-05	0.00092	0.00015	5.07382	1.48562	765.451
OU81999 - 21	121.3	4.8	1.46729	0.00018	1.88685	0.00011	0.282847	3.5e-05	0.0004327	6.4e-06	4.85298	1.23802	781.645
OU81999 - 22	119.9	4.9	1.46731	0.00016	1.88689	8.9e-05	0.282873	3.1e-05	0.0003989	1.8e-06	5.74459	1.09653	723.785
OU81999 - 23	137.9	6.5	1.46728	0.00016	1.88682	0.00014	0.282887	3.1e-05	0.000432	2.7e-05	6.63266	1.09658	681.488
OU81999 - 24	122.8	4.7	1.46721	0.00017	1.88697	0.00013	0.282857	4.6e-05	0.000824	4.1e-05	5.20788	1.62712	760.254
OU81999 - 25	118.9	3.3	1.46725	0.00015	1.88695	0.00012	0.282905	4.3e-05	0.00131	0.00016	6.78288	1.52099	656.831
OU49210
OU49210 - 1	124.8	1.5	1.4672	0.00014	1.88698	9.8e-05	0.282764	3.7e-05	0.001308	1.5e-05	1.92173	1.30878	970.569
OU49210 - 2	126.5	1.5	1.46734	0.00014	1.88687	8e-05	0.282825	3e-05	0.00066	1.2e-05	4.17	1.06117	829.203
OU49210 - 3	125.7	1.8	1.46727	0.00013	1.88694	9.4e-05	0.28282	2.3e-05	0.0011497	6.1e-06	3.93499	0.813566	843.504
OU49210 - 4	125.1	1.8	1.46727	0.00017	1.88693	8.9e-05	0.282812	3.2e-05	0.001039	9.8e-05	3.64827	1.13192	861.244
OU49210 - 5	128.3	1.8	1.46723	0.00018	1.88698	0.00011	0.282842	3.8e-05	0.000912	1.7e-05	4.78922	1.34416	791.258
OU49210 - 6	124.3	1.8	1.46732	0.00014	1.88685	0.00011	0.282803	3.4e-05	0.001113	3.9e-05	3.30659	1.20266	882.309
OU49210 - 7	125.4	1.8	1.46736	0.00014	1.88689	0.00011	0.282766	3.3e-05	0.000842	5e-05	2.04394	1.16729	963.297
OU49210 - 8	127.1	1.6	1.46725	0.0002	1.88679	8.6e-05	0.282821	3.7e-05	0.001098	3.9e-05	4.00479	1.30878	840.18
OU49210 - 9	127.6	1.8	1.4674	0.00014	1.88693	0.0001	0.282802	3.4e-05	0.001095	3.3e-05	3.34372	1.20267	882.571
OU49210 - 10	124	1.7	1.46733	0.00017	1.8868	0.00011	0.282805	3.9e-05	0.001214	2.2e-05	3.3626	1.37952	878.514
OU49210 - 11	124.4	1.9	1.46723	0.00014	1.88692	9.1e-05	0.282804	3.3e-05	0.001371	7.3e-05	3.32289	1.16729	881.353
OU49210 - 12	124.6	1.5	1.46731	0.00013	1.88694	0.0001	0.282768	3.9e-05	0.001122	5.1e-05	2.07427	1.37952	960.739
OU49210 - 13	125.2	1.4	1.46714	0.00014	1.88685	0.00012	0.282836	4.4e-05	0.001326	7e-05	4.4756	1.55639	808.742
OU49210 - 14	124.9	1.5	1.46735	0.00013	1.88694	0.0001	0.282803	3.9e-05	0.000926	2.8e-05	3.33494	1.37952	880.985
OU49210 - 15	128.3	1.8	1.46727	0.00013	1.88688	0.0001	0.282832	3.4e-05	0.001153	2.3e-05	4.41505	1.20267	815.053
OU49210 - 16	126	1.6	1.46725	0.00014	1.8869	0.0001	0.28281	3.1e-05	0.000966	2.5e-05	3.60301	1.09655	864.833
OU49210 - 17	125.4	1.4	1.4673	0.00017	1.887	0.0001	0.282811	3.8e-05	0.001338	5e-05	3.59457	1.34415	864.893
OU49210 - 18	124.5	1.6	1.46729	0.00015	1.8869	9.4e-05	0.2828	3.9e-05	0.001642	1e-05	3.16123	1.37952	891.697
OU49210 - 19	123.7	1.6	1.46723	0.00014	1.88692	7.1e-05	0.282783	3.7e-05	0.000665	1.1e-05	2.62287	1.30877	925.229
OU49210 - 20	128.1	2.2	1.46726	0.00016	1.88692	0.0001	0.282799	3.5e-05	0.000916	5.7e-05	3.26353	1.23804	888.06
P58446
RT_P58446 - 1	119.7	5.3	1.46723	0.00012	1.88698	0.00011	0.28289	2.8e-05	0.00048	1.5e-05	6.33509	0.990415	686.009
RT_P58446 - 2	120.5	5.1	1.46729	0.00016	1.88707	0.00013	0.282864	3.1e-05	0.00059	5.3e-05	5.42421	1.09653	744.66
RT_P58446 - 3	126.8	5	1.46708	0.00015	1.88695	9.3e-05	0.282899	2.4e-05	0.000386	1.5e-05	6.81708	0.84894	660.92
RT_P58446 - 4	123	5.6	1.46726	0.00012	1.88685	0.00013	0.282902	3.1e-05	0.000462	3.5e-05	6.83341	1.09654	656.863
RT_P58446 - 5	123	5.5	1.46723	0.00017	1.88679	0.00011	0.282899	2.5e-05	0.0002867	8.8e-06	6.74155	0.884305	662.72
RT_P58446 - 6	128.7	7.4	1.4672	0.00017	1.88695	0.0001	0.282853	3.3e-05	0.000414	1.1e-05	5.22936	1.1673	763.571
RT_P58446 - 7	127.9	6	1.46721	0.00019	1.8868	0.00012	0.28291	3.2e-05	0.000569	1.7e-05	7.21491	1.13192	636.421
RT_P58446 - 8	123.2	6.2	1.46725	0.00013	1.88688	9.9e-05	0.282866	2.7e-05	0.0004147	5.2e-06	5.56826	0.95505	737.633
RT_P58446 - 9	120.8	6.6	1.46735	0.0002	1.88692	0.0001	0.28287	2.8e-05	0.0003541	5e-06	5.66184	0.990417	729.769
RT_P58446 - 10	122.8	6.3	1.46713	0.00017	1.88674	9.6e-05	0.282897	2.7e-05	0.0004228	1.1e-06	6.65534	0.955049	668.058
RT_P58446 - 11	121.5	6.2	1.46734	0.00018	1.88692	0.00011	0.282873	3e-05	0.0004286	4e-06	5.77738	1.06116	722.967
RT_P58446 - 12	124.7	5.8	1.46724	0.00019	1.88686	0.00016	0.282886	3.5e-05	0.0005779	7.6e-06	6.29521	1.23803	692.519
RT_P58446 - 13	122.9	5.2	1.46719	0.00018	1.88692	9.8e-05	0.282857	3.7e-05	0.000528	5.7e-05	5.23411	1.30877	758.665
RT_P58446 - 14	127.7	5.4	1.46726	0.00014	1.88686	0.00012	0.282888	2.9e-05	0.0003921	8e-06	6.44727	1.02581	685.21
RT_P58446 - 15	121.5	5.6	1.46728	0.00022	1.88704	0.00012	0.282889	3.7e-05	0.000796	2.8e-05	6.31382	1.30877	688.794
RT_P58446 - 16	122.4	5.7	1.46727	0.00016	1.8869	0.00012	0.282879	3.1e-05	0.000759	9.1e-05	5.98265	1.09654	710.608
RT_P58446 - 17	131.5	6.8	1.46727	0.00017	1.88671	0.00011	0.282881	2.8e-05	0.0004718	9.8e-06	6.27632	0.990441	699.12
RT_P58446 - 18	122.5	5.6	1.4674	0.00015	1.88694	0.00011	0.282862	2.9e-05	0.000652	4.3e-05	5.39216	1.02579	748.287
RT_P58446 - 19	124.7	8.2	1.46726	0.00016	1.88695	0.00011	0.282875	3.5e-05	0.000536	1.3e-05	5.90957	1.23803	717.088
RT_P58446 - 20	123.1	5.1	1.46727	0.00015	1.88683	0.00011	0.282885	2.8e-05	0.000689	1.8e-05	6.2158	0.990422	696.309
RT_P58446 - 21	126.2	5.5	1.46721	0.00014	1.88694	8.6e-05	0.282866	3.2e-05	0.0003894	3.5e-06	5.6363	1.13192	735.681
RT_P58446 - 22	128.1	7.1	1.46724	0.00014	1.88696	0.00014	0.2829	2.2e-05	0.000479	1e-05	6.87318	0.778198	658.375
RT_P58446 - 23	134.6	7.3	1.46726	0.00018	1.88678	0.00011	0.282875	3.1e-05	0.0003374	5.6e-06	6.14408	1.09657	710.007
18MS25B
RT_18MS25B - 1	55	24	1.46724	0.00017	1.88681	7.7e-05	0.282973	3.3e-05	0.000373	1.7e-05	7.85628	1.16711	537.63
RT_18MS25B - 2	75.3	5.5	1.46739	0.00011	1.88681	0.00012	0.28299	2.4e-05	0.001234	3.3e-05	8.861	0.848843	489.568
RT_18MS25B - 3	129.3	9	1.46721	0.00019	1.88685	8e-05	0.282968	2.5e-05	0.000816	1.4e-05	9.27604	0.884318	505.883
RT_18MS25B - 4	107	33	1.46734	0.00018	1.88686	0.00013	0.282972	3e-05	0.00098	6.9e-05	8.92161	1.06113	510.85
RT_18MS25B - 5	88	26	1.46728	0.00018	1.88686	8.5e-05	0.282998	2.7e-05	0.0008081	3.9e-06	9.44082	0.954976	462.575
RT_18MS25B - 6	88	19	1.46726	0.00015	1.88696	0.0001	0.282976	2.6e-05	0.001005	2.4e-05	8.65124	0.919606	513.052
RT_18MS25B - 7	231	32	1.46732	0.00017	1.88686	8.3e-05	0.282958	2.7e-05	0.000639	6.7e-05	11.1612	0.95528	465.831
RT_18MS25B - 8	76.1	5.5	1.46734	0.00016	1.88688	8.9e-05	0.28296	2.7e-05	0.001041	1.1e-05	7.82678	0.95495	556.262
RT_18MS25B - 9	82.9	6.7	1.46731	0.00018	1.88685	0.00011	0.28298	3.1e-05	0.001802	8.5e-05	8.63901	1.09644	509.786
RT_18MS25B - 10	76.6	5	1.4673	0.00026	1.88688	0.00012	0.283041	3.4e-05	0.00151	0.00033	10.6787	1.20253	374.3
RT_18MS25B - 11	241	51	1.46694	0.00019	1.88694	6.9e-05	0.283022	2.8e-05	0.00169	0.00027	13.4769	0.990682	325.102
RT_18MS25B - 12	75.1	2.2	1.4672	0.00017	1.88681	6.7e-05	0.282963	2.7e-05	0.0005313	9.4e-06	7.93663	0.954948	548.455
RT_18MS25B - 13	84	11	1.46733	0.00026	1.88687	8.1e-05	0.28301	2.8e-05	0.001043	2.8e-05	9.76537	0.990336	438.639
RT_18MS25B - 14	91	22	1.46733	0.00021	1.88684	9e-05	0.282985	2.9e-05	0.000422	3.6e-05	9.06937	1.02572	488.708
RT_18MS25B - 15	80.3	6.2	1.46745	0.00019	1.8868	0.00011	0.282967	2.8e-05	0.002157	6.7e-05	8.10565	0.990328	541.791
RT_18MS25B - 16	66.2	5.8	1.46739	0.00019	1.88682	7.9e-05	0.282977	2.5e-05	0.0011	0.00011	8.21216	0.884194	523.798
RT_18MS25B - 17	80	10	1.46754	0.0002	1.88689	8.9e-05	0.282951	3.1e-05	0.001109	3.5e-05	7.58891	1.09643	574.54
RT_18MS25B - 18	76.3	2.9	1.46753	0.00031	1.88679	5.8e-05	0.28294	4.2e-05	0.000635	3e-05	7.14419	1.48548	599.976
RT_18MS25B - 19	79	4.8	1.46722	0.00013	1.88688	0.00014	0.283048	3e-05	0.00256	0.00014	10.9224	1.06106	360.589
RT_18MS25B - 20	70	15	1.46723	0.00019	1.88692	8.7e-05	0.282996	2.8e-05	0.001056	6e-05	8.96791	0.990305	478.528
15NZ67
RT_15NZ67 - 1	219.1	5.2	1.46717	0.00017	1.88691	9e-05	0.282892	2.7e-05	0.000704	1e-05	8.55624	0.955254	623.127
RT_15NZ67 - 2	234.2	7.6	1.46712	0.00019	1.88696	0.00012	0.282861	2.9e-05	0.000422	2.1e-05	7.83296	1.02605	681.304
RT_15NZ67 - 3	234.9	6.9	1.46727	0.00016	1.8868	0.00014	0.282891	3.1e-05	0.0004373	2.2e-06	8.90743	1.09681	613.208
RT_15NZ67 - 4	233.7	8.1	1.46718	0.00017	1.88691	0.00012	0.282885	3.5e-05	0.000627	2e-05	8.63937	1.23833	629.392
RT_15NZ67 - 5	239	12	1.46731	0.00016	1.8868	0.00012	0.282909	3.6e-05	0.00043	1.7e-05	9.63574	1.27373	569.875
RT_15NZ67 - 6	228.4	8.5	1.46721	0.00017	1.88683	0.00012	0.282894	2.3e-05	0.000588	2.1e-05	8.84765	0.813752	611.876
RT_15NZ67 - 7	201	10	1.46727	0.00017	1.88676	0.00011	0.282902	3.2e-05	0.0002453	3.8e-06	8.57587	1.13211	607.518
RT_15NZ67 - 8	226.1	5.6	1.46722	0.00013	1.88689	0.00011	0.282904	2.5e-05	0.000747	2.9e-05	9.12724	0.884508	592.175
RT_15NZ67 - 9	210.9	4.6	1.46733	0.00017	1.88688	7.6e-05	0.282922	3.2e-05	0.0005607	7.7e-06	9.45857	1.13213	558.931
RT_15NZ67 - 10	225.1	6.7	1.46721	0.00013	1.88687	0.00011	0.282884	2.7e-05	0.000766	4.7e-05	8.395	0.955267	638.189
RT_15NZ67 - 11	228.7	8	1.46734	0.00014	1.88693	0.00011	0.282909	2.4e-05	0.0004089	6.9e-06	9.41205	0.849133	576.021
RT_15NZ67 - 12	229.9	8.7	1.46737	0.00018	1.88684	0.00011	0.282889	2.8e-05	0.0007167	7.3e-06	8.68404	0.990658	623.524
RT_15NZ67 - 13	235.2	7.5	1.46724	0.00016	1.88686	0.0001	0.28289	2.4e-05	0.000676	2.3e-05	8.84149	0.849145	617.662
RT_15NZ67 - 14	242.6	6	1.46731	0.00016	1.88686	0.00011	0.282914	2.8e-05	0.000756	1.7e-05	9.8396	0.990686	559.683
RT_15NZ67 - 15	234.2	8.6	1.46733	0.00014	1.8869	0.0001	0.282885	2.4e-05	0.0004483	8e-06	8.67802	0.849143	627.318
RT_15NZ67 - 16	231.7	8.4	1.46727	0.00014	1.88695	8.9e-05	0.282894	2.2e-05	0.0004788	8.3e-06	8.93674	0.778377	608.797
RT_15NZ67 - 17	240.6	7.1	1.4671	0.00012	1.88697	0.00011	0.282883	2.9e-05	0.0006479	5.4e-06	8.71636	1.02606	629.942
RT_15NZ67 - 18	235.3	8.3	1.46727	0.0002	1.8869	9.7e-05	0.282893	3.1e-05	0.000669	5.6e-05	8.95091	1.09681	610.746
RT_15NZ67 - 19	229.8	8.9	1.46721	0.00017	1.88687	0.00013	0.282905	3e-05	0.000557	1.7e-05	9.27224	1.06142	585.836
RT_15NZ67 - 20	232.7	9.5	1.46725	0.00017	1.88689	0.00013	0.282932	2.6e-05	0.000329	1.8e-05	10.3263	0.919902	520.675
18MS505A
RT_18MS505A - 1	178.7	3.6	1.46715	0.00016	1.88685	0.00011	0.282908	2.8e-05	0.000796	3.8e-06	8.22958	0.990545	611.955
RT_18MS505A - 2	180.6	3.9	1.46724	0.00018	1.88677	0.00014	0.282973	3.1e-05	0.001122	5.7e-05	10.5315	1.09668	466.225
RT_18MS505A - 3	149.6	5.5	1.46724	0.00015	1.88681	9.7e-05	0.282903	3.3e-05	0.000654	3.4e-05	7.43384	1.16735	639.672
RT_18MS505A - 4	175.5	7.6	1.46722	0.00016	1.88693	0.00011	0.282897	2.7e-05	0.0002853	6.9e-06	7.83011	0.955161	634.927
RT_18MS505A - 5	173.6	5.5	1.46724	0.00016	1.88688	0.00014	0.282918	2.6e-05	0.000666	2.5e-05	8.48731	0.919781	591.444
RT_18MS505A - 6	170.8	8.1	1.46726	0.00021	1.88681	0.00014	0.282944	3e-05	0.000479	3.7e-05	9.36706	1.06128	532.982
RT_18MS505A - 7	175.5	4.3	1.46721	0.00017	1.8869	0.00013	0.282919	3e-05	0.001034	6.4e-05	8.52146	1.06129	590.769
RT_18MS505A - 8	176.1	4.2	1.46722	0.00015	1.88678	0.00011	0.282932	3.4e-05	0.0005676	4.7e-06	9.04865	1.2028	557.548
RT_18MS505A - 9	174.6	3.8	1.4673	0.00019	1.8869	0.00011	0.282895	3.2e-05	0.0005029	2.6e-06	7.71434	1.13204	641.604
RT_18MS505A - 10	172.1	6.7	1.46734	0.00015	1.88693	0.00011	0.282919	3.7e-05	0.0002733	6.7e-06	8.53464	1.30892	587.23
RT_18MS505A - 11	177.5	4.7	1.46728	0.00016	1.88689	0.00012	0.282926	3.5e-05	0.0008471	8.5e-06	8.83425	1.23818	572.366
RT_18MS505A - 12	134.8	6	1.46724	0.00016	1.88684	0.00013	0.282923	3.4e-05	0.000415	2e-05	7.83948	1.20269	602.037
RT_18MS505A - 13	170.7	4.3	1.46727	0.00013	1.88695	0.00011	0.282926	3.2e-05	0.000737	2e-05	8.69897	1.13203	575.618
RT_18MS505A - 14	178.2	4.6	1.46724	0.00013	1.88682	0.00013	0.282919	2.6e-05	0.000456	2.2e-05	8.64793	0.919791	584.83
RT_18MS505A - 15	176.6	5.1	1.46714	0.00015	1.88681	0.00012	0.282912	3e-05	0.000631	3.3e-05	8.34467	1.06129	602.937
RT_18MS505A - 16	176.3	3.7	1.46719	0.00012	1.8869	0.00012	0.282898	2.9e-05	0.000457	1.1e-06	7.86314	1.02592	633.453
RT_18MS505A - 17	144.2	3.5	1.46727	0.00021	1.88687	0.00012	0.282892	3e-05	0.0007834	1.8e-06	6.91447	1.06122	668.518
RT_18MS505A - 18	172.3	4.2	1.46725	0.00015	1.88694	0.00011	0.282902	3.8e-05	0.00046	1e-05	7.91638	1.34429	626.88
RT_18MS505A - 19	175.9	4.8	1.46724	0.00017	1.88677	8.2e-05	0.282921	3.7e-05	0.00040608	7.8e-07	8.67393	1.30893	581.343
RT_18MS505A - 20	177.6	6.1	1.46717	0.00019	1.88689	9.1e-05	0.282925	3.3e-05	0.000337	2.2e-05	8.86098	1.16743	570.736
18WA570
RT_18WA570 - 1	135	2.9	1.46717	0.00014	1.88681	8.4e-05	0.282925	2.9e-05	0.000801	2e-05	7.88017	1.02582	599.598
RT_18WA570 - 2	134.5	3	1.46715	0.00012	1.88695	9.6e-05	0.282908	2.6e-05	0.00089	0.0001	7.26004	0.919701	638.779
RT_18WA570 - 3	134	2.3	1.46726	0.00014	1.88689	0.00011	0.282895	2.9e-05	0.001951	3.1e-05	6.69534	1.02582	674.396
RT_18WA570 - 4	134	2.7	1.46732	0.00018	1.88698	0.00011	0.282925	3e-05	0.001467	4e-05	7.79942	1.06119	603.96
RT_18WA570 - 5	133	3	1.4673	0.00013	1.88684	8.5e-05	0.282913	3.6e-05	0.000729	3e-05	7.41856	1.27343	627.475
RT_18WA570 - 6	134.7	3.4	1.46728	0.00011	1.88687	0.0001	0.282909	2.9e-05	0.00067	1.8e-05	7.31935	1.02582	635.154
RT_18WA570 - 7	129.9	3.2	1.46721	0.00021	1.88675	9.7e-05	0.282943	2.9e-05	0.0010034	9.8e-06	8.38866	1.02581	563.078
RT_18WA570 - 8	133.9	4.8	1.46721	0.00014	1.88688	8.7e-05	0.28291	2.7e-05	0.0005444	2.7e-06	7.34838	0.955073	632.666
RT_18WA570 - 9	132.7	4.4	1.46716	0.00016	1.88684	0.00012	0.282929	2.7e-05	0.000658	6.3e-05	7.98422	0.95507	591.13
RT_18WA570 - 10	135.1	3.2	1.4672	0.00012	1.88696	0.00012	0.282907	2.7e-05	0.001447	8.9e-05	7.18791	0.955076	643.856
RT_18WA570 - 11	131.7	4.7	1.46716	0.00012	1.88681	0.00015	0.282904	3e-05	0.000344	1.6e-05	7.10542	1.06119	646.421
RT_18WA570 - 12	136	3.5	1.46732	0.00016	1.88684	9.9e-05	0.282938	3e-05	0.00123	3.4e-05	8.32317	1.0612	572.101
RT_18WA570 - 13	137.2	4.2	1.46718	0.00019	1.88682	9.2e-05	0.282904	3.5e-05	0.0004262	6.8e-06	7.21915	1.23807	643.53
RT_18WA570 - 14	135.5	3.7	1.4672	0.00015	1.8868	0.00013	0.282891	3.6e-05	0.00063	1.7e-05	6.70367	1.27344	675.056
RT_18WA570 - 15	131.8	3.4	1.4673	0.00013	1.88708	0.00013	0.282924	2.6e-05	0.001768	3.2e-05	7.69098	0.919696	609.137
18WA554A
RT_18WA554A - 1	124.1	7	1.46723	0.00018	1.88682	0.0001	0.282926	2.6e-05	0.000464	3.6e-05	7.70633	0.91968	602.047
RT_18WA554A - 2	125	7.1	1.46734	0.00019	1.8868	0.00011	0.282912	2.5e-05	0.0005531	6.8e-06	7.22351	0.884309	633.571
RT_18WA554A - 3	125.3	5.7	1.46716	0.00021	1.88685	0.00013	0.28294	3.6e-05	0.000513	2.1e-05	8.22382	1.27341	569.957
RT_18WA554A - 4	124.7	5.1	1.46725	0.00016	1.88694	0.00013	0.282871	3.1e-05	0.00063	3.6e-05	5.76033	1.09654	726.593
RT_18WA554A - 5	124.2	5.5	1.46727	0.00019	1.88683	9.6e-05	0.282921	3.1e-05	0.000676	1.9e-05	7.51425	1.09654	614.385
RT_18WA554A - 6	125.2	7.1	1.46721	0.00017	1.88678	7.7e-05	0.282901	3.2e-05	0.000612	8.6e-06	6.83391	1.13192	658.577
RT_18WA554A - 7	129.4	4.2	1.46725	0.00016	1.88684	0.0001	0.282908	2.5e-05	0.000885	1.1e-05	7.14995	0.884318	641.755
RT_18WA554A - 8	124.1	4.7	1.46721	0.00015	1.88686	0.00013	0.282927	2.4e-05	0.000641	2e-05	7.72718	0.848935	600.716
RT_18WA554A - 9	128.1	6	1.46723	0.00019	1.88683	0.0001	0.282903	2.9e-05	0.0005982	9.6e-06	6.9692	1.02581	652.252
RT_18WA554A - 10	121.8	4.7	1.46725	0.00018	1.88688	0.00013	0.282884	2.5e-05	0.00078	9e-06	6.14477	0.884303	699.803
RT_18WA554A - 11	125.9	5.6	1.46717	0.00021	1.88667	0.0001	0.282898	3.5e-05	0.0007256	9.7e-06	6.73364	1.23804	665.526
RT_18WA554A - 12	124.7	5.3	1.46726	0.00016	1.8868	9.4e-05	0.282894	3e-05	0.000592	2.2e-05	6.57703	1.06117	674.558
RT_18WA554A - 13	127.9	4.9	1.46724	0.00017	1.88691	0.00012	0.282875	3.5e-05	0.000769	3.3e-05	5.95995	1.23804	716.419
RT_18WA554A - 14	124.4	4.7	1.46726	0.00014	1.88685	0.0001	0.282872	3.2e-05	0.00079	2e-05	5.776	1.13191	725.357
RT_18WA554A - 15	131.6	9	1.46723	0.00018	1.88693	0.00011	0.282886	3.1e-05	0.000463	1.9e-05	6.45615	1.09656	687.739
RT_18WA554A - 16	133.3	8.3	1.46714	0.0002	1.88689	9.5e-05	0.28291	2.5e-05	0.00054	2e-05	7.33563	0.884326	633.004
RT_18WA554A - 17	124.5	5.9	1.46712	0.00015	1.88687	8.7e-05	0.282928	2.4e-05	0.000741	1.8e-05	7.76305	0.848936	598.743
RT_18WA554A - 18	125.6	5.2	1.46723	0.00016	1.88681	0.00012	0.282898	3.1e-05	0.0004994	5.8e-06	6.74589	1.09655	664.507
RT_18WA554A - 19	129.4	5.9	1.46722	0.00017	1.88659	0.00011	0.282932	4e-05	0.000649	1.2e-05	8.01908	1.41491	586.285
RT_18WA554A - 20	126.1	4.5	1.46715	0.00014	1.88681	0.00011	0.282927	3.2e-05	0.0006267	4.5e-06	7.77204	1.13192	599.439
18MS03A
RT_18MS03A - 1	132.2	3.3	1.46727	0.00014	1.88685	9.8e-05	0.282921	2.4e-05	0.0006769	6.1e-06	7.68867	0.848951	609.601
RT_18MS03A - 2	134.4	2.4	1.46728	0.0002	1.88667	0.00011	0.28296	3.1e-05	0.0007355	1.2e-06	9.11101	1.09657	520.482
RT_18MS03A - 3	135.8	3	1.46721	0.00012	1.88687	0.0001	0.282928	2.6e-05	0.0004229	4e-06	8.03763	0.919704	590.179
RT_18MS03A - 4	140.3	5.5	1.46722	0.00015	1.88681	0.00014	0.282915	3.3e-05	0.000532	3.3e-05	7.66658	1.16733	617.439
RT_18MS03A - 5	132.4	3.2	1.46726	0.00015	1.88684	8.2e-05	0.282921	2.7e-05	0.000527	2.1e-05	7.70616	0.95507	608.644
RT_18MS03A - 6	136.4	3.2	1.46732	0.00018	1.88692	0.00014	0.282908	2.9e-05	0.0006541	1.6e-06	7.3225	1.02582	636.302
RT_18MS03A - 7	132.7	4.1	1.46719	0.00017	1.8867	0.00012	0.282933	2.9e-05	0.0004089	4.8e-06	8.14757	1.02582	580.698
RT_18MS03A - 8	138.1	3.1	1.46726	0.00014	1.88687	0.0001	0.282927	2.1e-05	0.0006986	4.5e-06	8.02764	0.742842	592.642
RT_18MS03A - 9	128.8	3.7	1.46723	0.00014	1.88678	0.0001	0.282947	2.7e-05	0.0003195	7.8e-06	8.56464	0.955062	550.962
RT_18MS03A - 10	135.2	2.6	1.46722	0.00017	1.88681	0.00011	0.282916	2.3e-05	0.000595	2.1e-05	7.58457	0.813583	618.626
RT_18MS03A - 11	135.3	2.6	1.46723	0.00017	1.88676	0.00013	0.28292	2.7e-05	0.0003958	8.6e-06	7.74607	0.955076	608.397
RT_18MS03A - 12	134.5	3.6	1.46731	0.00015	1.88694	0.00011	0.2829	2.8e-05	0.0004506	2.6e-06	7.01614	0.990447	654.337
RT_18MS03A - 13	138.6	3.5	1.46718	0.00012	1.88675	9.4e-05	0.282945	3.4e-05	0.0003608	5.2e-06	8.70623	1.2027	549.689
RT_18MS03A - 14	136.2	3.1	1.46725	0.00018	1.8869	9.6e-05	0.282916	2.8e-05	0.0004572	3.4e-06	7.61885	0.990451	617.232
RT_18MS03A - 15	133.4	3.6	1.46723	0.00016	1.88684	0.00012	0.282908	3e-05	0.000469	1.1e-05	7.27334	1.06119	637.058
18WA573
RT_18WA573 - 1	163	13	1.4672	0.00017	1.88676	0.00013	0.282967	3.5e-05	0.000804	1.2e-05	9.97434	1.23814	487.939
RT_18WA573 - 2	152.6	2.5	1.46716	0.00018	1.88679	0.0001	0.28293	3.5e-05	0.000467	3.6e-05	8.47333	1.23811	575.678
RT_18WA573 - 3	157.1	5	1.46726	0.00018	1.8869	0.00013	0.282932	2.8e-05	0.001251	1.8e-05	8.56146	0.990497	573.617
RT_18WA573 - 4	148	12	1.46716	0.00015	1.88688	0.00011	0.282932	4.3e-05	0.000517	2.6e-05	8.43816	1.52109	574.276
RT_18WA573 - 5	156	14	1.46718	0.00016	1.88674	0.00013	0.282916	3.8e-05	0.0004063	1.5e-06	8.05903	1.34424	604.84
RT_18WA573 - 6	148	10	1.46719	0.0002	1.88655	0.00013	0.282963	3.6e-05	0.0005983	1.8e-06	9.5268	1.27347	504.679
RT_18WA573 - 7	149.1	9.6	1.46727	0.00016	1.88696	0.00013	0.28291	2.8e-05	0.000568	1.2e-05	7.67902	0.99048	623.627
RT_18WA573 - 8	148.2	6.9	1.4673	0.00021	1.88687	0.00011	0.282909	3.4e-05	0.000812	1.1e-05	7.60002	1.20272	627.955
RT_18WA573 - 9	156.2	5.7	1.4672	0.00018	1.88689	0.00012	0.282935	3.4e-05	0.0002913	1.7e-06	8.74743	1.20274	561.019
RT_18WA573 - 10	157.1	7.1	1.46722	0.00016	1.88677	0.00013	0.282879	3.1e-05	0.0008711	9.9e-06	6.72607	1.09662	690.769
RT_18WA573 - 11	155	11	1.46729	0.00016	1.88681	0.00011	0.282914	3.2e-05	0.00056	3.4e-05	7.95052	1.13199	610.976
RT_18WA573 - 12	154.5	8.7	1.46725	0.00012	1.88677	0.00012	0.282911	2.4e-05	0.000516	1.8e-05	7.83794	0.848993	617.767
RT_18WA573 - 13	158	11	1.46732	0.0002	1.8868	0.00013	0.282946	3e-05	0.000805	2.3e-05	9.12262	1.06125	538.462
RT_18WA573 - 14	137	11	1.46726	0.00017	1.88705	0.00014	0.282903	2.5e-05	0.0002982	6e-06	7.19097	0.884333	645.169
OU50089
RT_OU50089 - 1	361.2	6.9	1.4672	0.00013	1.88685	0.00013	0.282672	3e-05	0.001472	3.2e-05	3.69449	1.06173	1045.63
RT_OU50089 - 2	363.6	6.7	1.46719	0.00018	1.88703	0.00012	0.282655	3.7e-05	0.001186	4.2e-05	3.2131	1.30947	1078.12
RT_OU50089 - 3	353.4	4.7	1.46715	0.00017	1.88681	0.00011	0.282692	2.5e-05	0.00142	4.4e-05	4.24773	0.88476	1004.28
RT_OU50089 - 4	371.9	6.7	1.46723	0.00017	1.88671	0.00011	0.2827	3.1e-05	0.0014168	9.3e-06	4.92787	1.09715	975.675
RT_OU50089 - 5	359.9	6.4	1.4671	0.00017	1.88686	0.00016	0.282653	2.9e-05	0.001608	4.6e-05	2.96182	1.02634	1091.14
RT_OU50089 - 6	358.2	5.5	1.46722	0.00014	1.88679	0.00014	0.282696	3.1e-05	0.00171	0.00011	4.42321	1.09711	996.924
RT_OU50089 - 7	358.3	7.6	1.46729	0.0002	1.88705	9.9e-05	0.282674	3.2e-05	0.000959	4.1e-05	3.82513	1.1325	1035.03
RT_OU50089 - 8	364.9	6	1.46727	0.00015	1.88683	0.00011	0.282659	3.8e-05	0.001719	1.2e-05	3.25376	1.34487	1076.57
RT_OU50089 - 9	355.7	6.5	1.46728	0.00019	1.88698	0.00012	0.282682	3.1e-05	0.001456	3.3e-05	3.93459	1.09711	1026.01
RT_OU50089 - 10	355.7	6.5	1.4672	0.00018	1.88691	0.00012	0.282661	3.9e-05	0.001426	4.6e-05	3.19846	1.38023	1072.79
RT_OU50089 - 11	362.9	6.4	1.46721	0.00013	1.8868	0.00012	0.2826	2.8e-05	0.001099	2.4e-05	1.27242	0.990952	1200.69
RT_OU50089 - 12	363.8	8.4	1.46723	0.00014	1.88676	0.00011	0.282677	3.4e-05	0.00126	0.00014	3.97817	1.2033	1029.66
RT_OU50089 - 13	367.7	8	1.46726	0.00016	1.88695	0.00011	0.282641	3.2e-05	0.00117	0.00011	2.80996	1.13253	1106.97
RT_OU50089 - 14	355.6	6.5	1.46713	0.00015	1.88681	0.00016	0.282672	3.9e-05	0.001348	8.1e-05	3.604	1.38023	1046.94
RT_OU50089 - 15	358.4	5.8	1.46728	0.00017	1.88685	7.8e-05	0.282664	2.7e-05	0.001641	5.5e-05	3.31135	0.955551	1067.76
RT_OU50089 - 16	370.7	6.4	1.46718	0.00016	1.88687	9.3e-05	0.282659	3.3e-05	0.001377	2.7e-05	3.46089	1.16793	1068.01
RT_OU50089 - 17	373.9	5.4	1.46723	0.00018	1.88685	0.00011	0.282685	3.4e-05	0.001609	3e-05	4.39219	1.20333	1011.34
RT_OU50089 - 18	359.4	5.7	1.46725	0.00019	1.88698	0.00012	0.28268	3.1e-05	0.001767	4e-05	3.86884	1.09712	1033.12
RT_OU50089 - 19	363.3	7.7	1.46705	0.00014	1.88679	0.00012	0.282629	3.1e-05	0.001587	6.5e-05	2.18987	1.09713	1142.83
RT_OU50089 - 20	363.6	5.7	1.46732	0.00017	1.88681	0.00012	0.282647	3.1e-05	0.001437	3.6e-05	2.86946	1.09713	1099.94
P78002
RT_P78002 - 1	355.2	9.9	1.46705	0.00018	1.88671	0.00011	0.282438	3e-05	0.001036	4.3e-05	-4.6125	1.06172	1566.21
RT_P78002 - 2	335.7	6.5	1.4671	0.00016	1.88685	0.00013	0.282379	3.5e-05	0.0006	3e-05	-7.02551	1.23861	1702.36
RT_P78002 - 3	337.8	3.9	1.4673	0.00017	1.88688	0.00011	0.282399	2.6e-05	0.001327	2.1e-05	-6.43445	0.920118	1666.92
RT_P78002 - 4	349.1	5.8	1.46724	0.00017	1.88683	8.1e-05	0.282442	3e-05	0.001294	2.3e-05	-4.6627	1.0617	1564.52
RT_P78002 - 5	347.5	5.4	1.46714	0.00019	1.88676	9.1e-05	0.28238	3e-05	0.000933	1.9e-05	-6.80807	1.0617	1698.08
RT_P78002 - 6	348.2	6.3	1.46719	0.00015	1.88697	0.00011	0.282393	3.1e-05	0.001244	2.9e-05	-6.40459	1.09709	1673.31
RT_P78002 - 7	350.4	9.7	1.46725	0.00019	1.88687	0.00016	0.282381	2.6e-05	0.00144	0.00019	-6.82749	0.920144	1701.6
RT_P78002 - 8	349.3	8.4	1.46725	0.00015	1.88677	9.7e-05	0.282404	2.5e-05	0.000771	2.8e-05	-5.88212	0.884752	1641.36
RT_P78002 - 9	347.8	5.6	1.46717	0.00015	1.88688	0.00012	0.282407	2.4e-05	0.00122	1.6e-05	-5.9122	0.849359	1642.06
RT_P78002 - 10	324.6	3.1	1.46732	0.00016	1.88675	8.3e-05	0.282467	2.3e-05	0.001412	1.4e-05	-4.32936	0.813927	1524.09
RT_P78002 - 11	333.2	6.3	1.46717	0.00017	1.88679	0.00011	0.282409	3.2e-05	0.001065	7.3e-05	-6.12134	1.13244	1643.61
RT_P78002 - 12	356.5	7.9	1.46719	0.00018	1.88691	0.00012	0.282418	2.5e-05	0.000941	2.1e-05	-5.26972	0.884766	1608.58
RT_P78002 - 13	329	12	1.46719	0.00018	1.88679	9.3e-05	0.282362	4e-05	0.001048	9.9e-05	-7.87168	1.41554	1750.11
RT_P78002 - 14	322.9	4.6	1.46721	0.00016	1.887	0.00012	0.282392	2.8e-05	0.00134	0.00013	-7.00441	0.990863	1690.87
RT_P78002 - 15	346	10	1.46719	0.00018	1.88697	0.0001	0.282426	2.8e-05	0.00155	0.00019	-5.35422	0.990915	1605.56
RT_P78002 - 16	340	6.7	1.4671	0.00019	1.88699	0.0001	0.282408	3.6e-05	0.001394	5.8e-05	-6.08387	1.27402	1646.65
RT_P78002 - 17	349	7.3	1.46718	0.00017	1.88674	9.4e-05	0.282418	3.1e-05	0.000963	7.1e-05	-5.43763	1.09709	1613.18
RT_P78002 - 18	343.2	7.7	1.46718	0.0002	1.88679	0.00013	0.282427	3.4e-05	0.000505	2e-05	-5.14074	1.20325	1589.91
RT_P78002 - 19	346.3	6.5	1.46718	0.00016	1.88702	0.00012	0.282434	1.9e-05	0.00113	0.0001	-4.9683	0.672407	1581.53
RT_P78002 - 20	322	6.1	1.46718	0.00017	1.88676	0.00011	0.282438	3.1e-05	0.0008352	7e-06	-5.28813	1.09703	1582.35
P40375
RT_P40375 - 1	296.9	7.4	1.46723	0.00016	1.88684	0.0001	0.282717	3.3e-05	0.001926	7.1e-05	3.82382	1.16774	986.424
RT_P40375 - 2	359.9	6.5	1.46719	0.00016	1.88685	0.00014	0.282669	3.3e-05	0.001396	5.5e-05	3.57866	1.1679	1051.96
RT_P40375 - 3	359.4	4.7	1.46718	0.00017	1.88675	0.00012	0.282695	3.3e-05	0.001969	1.2e-05	4.35158	1.1679	1002.43
RT_P40375 - 4	355.5	4.3	1.46707	0.00015	1.88673	0.00012	0.282704	3.8e-05	0.001893	2e-05	4.60591	1.34484	983.161
RT_P40375 - 5	290.6	2.9	1.46717	0.00015	1.88684	9.8e-05	0.28267	2.8e-05	0.00228	6e-05	1.95995	0.990792	1099.75
RT_P40375 - 6	339.5	8.4	1.46706	0.00032	1.8869	0.00015	0.282747	4.3e-05	0.001264	9.2e-05	5.93165	1.52174	886.069
RT_P40375 - 7	323.6	5.8	1.46724	0.00011	1.88689	9.4e-05	0.282686	3e-05	0.00187	1.4e-05	3.30102	1.06164	1040.82
RT_P40375 - 8	326.6	5	1.46712	0.00011	1.88684	0.0001	0.282702	1.9e-05	0.002296	2.2e-05	3.83832	0.672377	1009.06
RT_P40375 - 9	353.4	4.7	1.4672	0.00012	1.88684	0.00012	0.282705	2.7e-05	0.001742	5.4e-05	4.63237	0.955541	979.813
RT_P40375 - 10	354.6	4.3	1.46726	0.00012	1.88687	0.0001	0.282688	2.3e-05	0.001734	4.6e-05	4.05805	0.813981	1017.29
RT_P40375 - 11	363.4	5.9	1.46726	0.00017	1.88684	0.00015	0.282717	3.3e-05	0.000911	7.1e-05	5.4693	1.16791	934.467
RT_P40375 - 12	345.9	5.1	1.46707	0.0002	1.88673	0.00012	0.282672	3.6e-05	0.00179	2.4e-05	3.29452	1.27403	1058.91
RT_P40375 - 13	357.2	5.5	1.467	0.00015	1.88675	0.00017	0.282729	3.9e-05	0.0016	0.00018	5.59593	1.38024	921.487
RT_P40375 - 14	362.1	5.3	1.46721	0.00017	1.88701	0.00014	0.282751	3.3e-05	0.00165	4.9e-05	6.4669	1.16791	869.866
RT_P40375 - 15	289.9	4.7	1.46711	0.0002	1.88674	9.3e-05	0.282708	3.2e-05	0.001592	3.8e-05	3.42215	1.13233	1006.39
RT_P40375 - 16	355	4.5	1.46717	0.00017	1.88687	0.00011	0.282702	3.4e-05	0.001455	1.6e-05	4.62766	1.20328	981.381
RT_P40375 - 17	236.9	8.1	1.46718	0.00015	1.88683	0.00012	0.282739	3.9e-05	0.001767	9e-05	3.36499	1.37987	967.976
RT_P40375 - 18	244.2	6.1	1.46716	0.00017	1.88693	0.00011	0.28268	3.4e-05	0.001728	2e-05	1.43802	1.20298	1096.02
RT_P40375 - 19	313	4.5	1.46725	0.0002	1.88695	0.00014	0.282691	3.6e-05	0.001763	2.2e-05	3.27653	1.27394	1033.96
RT_P40375 - 20	347.3	4.2	1.46725	0.00016	1.88692	0.00011	0.282709	2.6e-05	0.001571	5e-05	4.68399	0.920138	971.693
P89652
RT_P89652 - 1	370	8.1	1.46712	0.00015	1.88686	0.00014	0.28283	2.8e-05	0.001628	8.3e-05	9.43628	0.990968	686.459
RT_P89652 - 2	347.5	4.5	1.46733	0.00014	1.88676	0.00011	0.282808	2.9e-05	0.001245	4.4e-05	8.26694	1.02631	743.401
RT_P89652 - 3	352.4	4.8	1.46729	0.00017	1.88696	0.00012	0.282787	4e-05	0.00262	0.00049	7.30806	1.41561	808.519
RT_P89652 - 4	359.5	6.7	1.46694	0.00024	1.88686	0.00015	0.282864	4.4e-05	0.00121	0.00014	10.5156	1.5572	609.031
RT_P89652 - 5	953	27	1.46717	0.00017	1.88688	0.00012	0.282403	3.7e-05	0.001147	9.1e-05	7.10846	1.31121	1296.42
RT_P89652 - 6	368.5	9.7	1.46716	0.00011	1.88691	0.00017	0.28287	3.7e-05	0.001155	6.2e-05	10.9356	1.30949	589.248
RT_P89652 - 7	356	6.2	1.46706	0.00019	1.88673	0.00011	0.282836	3e-05	0.00202	0.0002	9.25805	1.06172	686.771
RT_P89652 - 8	371.2	6.1	1.46707	0.00019	1.8868	0.00011	0.282789	3.2e-05	0.001727	6e-05	7.9864	1.13254	780.105
RT_P89652 - 9	370.6	7.7	1.46715	0.00019	1.88704	0.00012	0.282871	3.6e-05	0.001545	2.7e-05	10.9205	1.2741	591.877
RT_P89652 - 10	357.6	6	1.46729	0.00015	1.88689	0.0001	0.282807	2.7e-05	0.00168	2.7e-05	8.34596	0.95555	746.355
RT_P89652 - 11	371	5.4	1.46721	0.00016	1.88683	0.0001	0.282822	3.1e-05	0.001294	1.3e-05	9.2566	1.09715	698.747
RT_P89652 - 12	366.2	5.8	1.4672	0.00016	1.88689	0.00011	0.282846	3.1e-05	0.001826	3.4e-05	9.87355	1.09713	655.461
RT_P89652 - 13	370.5	6.6	1.46725	0.00019	1.88681	9.6e-05	0.282843	2.8e-05	0.001032	4.2e-05	10.0534	0.990969	647.35
RT_P89652 - 14	360.2	5.8	1.46722	0.00013	1.88685	0.00012	0.282841	3e-05	0.001284	9.6e-05	9.69907	1.06173	661.877
RT_P89652 - 15	366.2	4.4	1.46713	0.0002	1.88705	0.00016	0.282884	4.2e-05	0.002077	7.3e-05	11.1575	1.48644	573.199
RT_P89652 - 16	357.9	5.5	1.4673	0.00013	1.88694	0.00016	0.28284	2.9e-05	0.002029	8.4e-05	9.43742	1.02633	676.8
RT_P89652 - 17	395.2	6.6	1.46726	0.00018	1.88688	0.0001	0.282821	2.7e-05	0.001176	5e-05	9.77296	0.95563	684.873
RT_P89652 - 18	358.4	4.5	1.46715	0.00017	1.88694	0.00014	0.282839	3.2e-05	0.002252	7.6e-05	9.35956	1.13251	682.178
RT_P89652 - 19	416	15	1.46711	0.00016	1.88679	0.00011	0.282692	3.7e-05	0.00089	0.00012	5.73541	1.30963	959.204
RT_P89652 - 20	369.3	4.3	1.46727	0.00018	1.88691	0.00013	0.282822	3.3e-05	0.001525	2e-05	9.16346	1.16792	703.359
RT_P89652 - 21	337.8	4.8	1.46736	0.00014	1.88693	9.1e-05	0.282749	3.1e-05	0.00203	0.00026	5.79436	1.09706	893.469
RT_P89652 - 22	359.4	4	1.46721	0.00018	1.88688	0.00012	0.282818	2.9e-05	0.001709	3.1e-05	8.7666	1.02634	720.894
RT_P89652 - 23	352.7	3.7	1.46738	0.00017	1.88686	9.1e-05	0.28278	3e-05	0.0023	0.00021	7.14134	1.06171	819.397
RT_P89652 - 24	357.2	4.3	1.46719	0.00015	1.88685	0.00012	0.282838	2.7e-05	0.00349	0.0002	9.00595	0.955549	703.846
RT_P89652 - 25	376.3	5.6	1.46717	0.00017	1.88695	0.00013	0.28283	3.1e-05	0.001634	2.1e-05	9.56894	1.09716	682.961
P89655
RT_P89655 - 1	358.5	5.5	1.46715	0.00013	1.88699	0.00012	0.282737	3.3e-05	0.001982	3.6e-05	5.81595	1.1679	908.502
RT_P89655 - 2	361.5	7.3	1.46716	0.00018	1.88674	0.00011	0.282792	3.5e-05	0.001153	6.9e-05	8.02428	1.23869	769.998
RT_P89655 - 3	368.6	6.2	1.46723	0.00018	1.8868	0.00011	0.282799	4.1e-05	0.001218	3.7e-05	8.40953	1.45106	751.009
RT_P89655 - 4	353	7.4	1.4671	0.00021	1.88679	0.00015	0.282782	3.5e-05	0.000982	5.5e-05	7.52679	1.23866	795.032
RT_P89655 - 5	362.2	8.7	1.46721	0.00015	1.88675	0.00014	0.282758	4.1e-05	0.001135	3.4e-05	6.84043	1.45103	846.124
RT_P89655 - 6	456.3	9.4	1.46719	0.00012	1.88687	0.00012	0.282789	3.2e-05	0.000587	2.8e-05	10.1397	1.13275	709.777
RT_P89655 - 7	349.4	5	1.46723	0.00016	1.88703	0.00016	0.282784	2.6e-05	0.001666	2e-05	7.36099	0.920142	802.763
RT_P89655 - 8	362.9	7.2	1.46724	0.00023	1.88686	0.0001	0.282835	3.4e-05	0.001453	3.1e-05	9.50417	1.2033	676.49
RT_P89655 - 9	365.7	7	1.46715	0.00016	1.8868	0.00013	0.282831	2.9e-05	0.001443	6.4e-05	9.42497	1.02635	683.776
RT_P89655 - 10	355.1	6.9	1.46729	0.00023	1.88695	0.00011	0.282777	4.2e-05	0.001693	1e-05	7.22806	1.4864	815.764
RT_P89655 - 11	360.2	6.2	1.46723	0.00016	1.88676	0.00012	0.282793	3.6e-05	0.001182	7.8e-05	8.02467	1.27407	768.944
RT_P89655 - 12	368.1	6.9	1.46717	0.00019	1.88684	0.0001	0.282782	3.2e-05	0.001536	1e-05	7.71948	1.13253	794.696
RT_P89655 - 13	359.4	7	1.46717	0.0002	1.88694	0.00011	0.282804	3.8e-05	0.000975	2.4e-05	8.44602	1.34485	741.387
RT_P89655 - 14	375	8.9	1.46719	0.00013	1.88689	0.00014	0.282785	3.6e-05	0.001464	5.1e-05	7.99089	1.27412	782.829
RT_P89655 - 15	359.7	5.7	1.46739	0.00014	1.88683	0.00017	0.282832	2.9e-05	0.001762	3.1e-05	9.25581	1.02634	689.845
RT_P89655 - 16	360.2	5.9	1.46719	0.00015	1.88674	0.00013	0.282833	2.9e-05	0.001611	7.4e-05	9.33786	1.02634	684.992
RT_P89655 - 17	366.5	6.3	1.46722	0.00017	1.88697	0.00013	0.282824	2.6e-05	0.00116	0.00012	9.26313	0.920177	694.765
RT_P89655 - 18	366.3	7.6	1.46725	0.00019	1.88675	9.9e-05	0.282789	3.2e-05	0.001506	3.4e-05	7.93608	1.13253	779.436
RT_P89655 - 19	364.8	7.2	1.4673	0.00015	1.88672	0.00012	0.282784	3.3e-05	0.001081	9.1e-05	7.82986	1.16791	785.032
RT_P89655 - 20	358.1	7.4	1.46714	0.00016	1.88683	0.00014	0.282799	2.7e-05	0.001353	3.1e-05	8.15109	0.955551	759.203
P57947
RT_P57947 - 1	383.8	6.3	1.46715	0.00017	1.88684	0.00013	0.282497	3.6e-05	0.00211	0.00016	-2.17831	1.27414	1435.49
RT_P57947 - 2	362.4	5	1.46719	0.00015	1.88685	0.00013	0.2826	2.8e-05	0.0008397	1e-06	1.32391	0.990951	1197.03
RT_P57947 - 3	370	4.1	1.46715	0.00019	1.88681	0.00011	0.28252	3.2e-05	0.000674	1.6e-05	-1.30111	1.13253	1369.15
RT_P57947 - 4	373.8	5.1	1.46711	0.00015	1.8868	0.00013	0.282603	2.6e-05	0.001461	3.6e-05	1.5246	0.920192	1193.35
RT_P57947 - 5	380.2	7	1.46712	0.00013	1.88668	0.00011	0.282455	2.9e-05	0.001431	2.1e-05	-3.56903	1.02638	1520.34
RT_P57947 - 6	377.3	9.2	1.46709	0.00012	1.88673	9.9e-05	0.282626	3.1e-05	0.000701	5.4e-05	2.60363	1.09716	1127.68
RT_P57947 - 7	383.4	5.5	1.46717	0.00015	1.88682	9.5e-05	0.28256	2.9e-05	0.001048	4.2e-05	0.313074	1.02639	1277.7
RT_P57947 - 8	370.4	4.6	1.46723	0.00014	1.8869	0.00011	0.282573	2.5e-05	0.001441	6.9e-05	0.395044	0.884793	1262.2
RT_P57947 - 9	370.7	4.1	1.46726	0.00017	1.88681	9.8e-05	0.282513	3.4e-05	0.00165	1.8e-05	-1.77341	1.20332	1399.54
RT_P57947 - 10	372.2	5.5	1.46732	0.00016	1.88679	0.00013	0.282607	3e-05	0.001141	2.8e-05	1.71092	1.06176	1180.27
RT_P57947 - 11	379.2	5.2	1.46712	0.00016	1.88686	9.3e-05	0.282466	2.2e-05	0.002317	8e-05	-3.4239	0.778634	1510.4
RT_P57947 - 12	373	6.8	1.46717	0.00012	1.88688	0.00011	0.282546	2.5e-05	0.000764	5e-05	-0.337462	0.884799	1310.62
RT_P57947 - 13	340.5	4.3	1.46706	0.00019	1.88685	0.0001	0.282544	2.9e-05	0.001713	5e-05	-1.33221	1.02629	1347.71
RT_P57947 - 14	375.1	7.9	1.46721	0.00012	1.88684	9.7e-05	0.282601	3.1e-05	0.000856	3.7e-05	1.6321	1.09716	1187.56
RT_P57947 - 15	384.4	7.7	1.46724	0.00017	1.88688	0.00012	0.282484	2.9e-05	0.001123	3.6e-05	-2.37424	1.02639	1448.33
RT_P57947 - 16	373.5	6.2	1.46715	0.00015	1.88681	0.00013	0.282635	3.4e-05	0.000816	2.5e-05	2.81047	1.20333	1111.54
RT_P57947 - 17	407.8	8.1	1.46717	0.00012	1.88681	0.00011	0.282383	3.4e-05	0.0003016	3.4e-06	-5.2211	1.20342	1646.24
RT_P57947 - 18	471	13	1.46705	8.3e-05	1.8868	0.00011	0.282317	2.2e-05	0.00061	0.00012	-6.25233	0.778794	1761.2
RT_P57947 - 19	396	12	1.46715	0.00011	1.88686	0.00012	0.282492	2.8e-05	0.000929	1.3e-05	-1.78943	0.991025	1420.62
RT_P57947 - 20	381	5.1	1.4672	0.00017	1.88681	9.6e-05	0.282579	2.8e-05	0.0009963	9e-06	0.9466	0.990992	1235.68
RT_P57947 - 21	399	11	1.46719	0.00017	1.88688	7.7e-05	0.282598	3.4e-05	0.000765	2.5e-05	2.07098	1.2034	1178.68
RT_P57947 - 22	373.1	5.4	1.46716	0.00012	1.88681	0.0001	0.282396	2.5e-05	0.002041	1.4e-05	-5.95999	0.884799	1665.15
RT_P57947 - 23	344	6.1	1.46719	0.00012	1.88679	0.00012	0.2826	2.8e-05	0.0010214	4.8e-06	0.881512	0.99091	1210.46
RT_P57947 - 24	355.3	7	1.46719	0.00016	1.88691	9.8e-05	0.28247	2.9e-05	0.00101	0.00013	-3.47171	1.02633	1494.45
RT_P57947 - 25	384.4	4.5	1.46712	0.00014	1.8869	8.6e-05	0.282537	2.7e-05	0.001341	7.8e-05	-0.553988	0.955607	1333.35
RT_P57947 - 26	359.2	6.3	1.46721	0.00016	1.88671	0.00012	0.282597	2.8e-05	0.001193	4.3e-05	1.06386	0.990944	1210.97
RT_P57947 - 27	419	13	1.46719	0.00011	1.88688	9.7e-05	0.282432	3.6e-05	0.001012	9.4e-05	-3.43596	1.27424	1542.74
RT_P57947 - 28	371	5	1.46711	0.00011	1.88694	7.9e-05	0.282574	2.6e-05	0.001086	1.9e-05	0.530603	0.920186	1254.1
RT_P57947 - 29	372.4	5.1	1.46717	0.00018	1.88689	0.0001	0.282579	2.6e-05	0.000972	2.8e-05	0.766001	0.920189	1240.3
P57930
RT_P57930 - 1	357	5.9	1.46726	0.00018	1.88678	0.0001	0.282525	2.9e-05	0.001022	1.5e-05	-1.49123	1.02633	1370.85
RT_P57930 - 2	364.2	4.1	1.4671	0.00013	1.88683	9.5e-05	0.282539	2.9e-05	0.000709	1.4e-05	-0.764161	1.02635	1330.62
RT_P57930 - 3	364.2	6.7	1.46712	0.00013	1.8868	0.00012	0.282446	3.2e-05	0.000908	2.4e-05	-4.1036	1.13252	1541.31
RT_P57930 - 4	399	10	1.46712	0.00013	1.8869	9.6e-05	0.282402	2.3e-05	0.000509	5e-05	-4.7985	0.814062	1612.67
RT_P57930 - 5	485	11	1.46717	0.00013	1.88685	0.00011	0.282302	3.4e-05	0.00078	2.9e-05	-6.53028	1.20363	1789.77
RT_P57930 - 6	363	5.2	1.46735	0.00017	1.88689	0.00012	0.282501	2.9e-05	0.00122	1.6e-05	-2.25826	1.02634	1424.04
RT_P57930 - 7	383.6	7.2	1.46718	0.00016	1.88692	0.00012	0.282519	3.2e-05	0.000832	4.4e-05	-1.07875	1.13257	1365.89
RT_P57930 - 8	358.7	7.7	1.46717	0.00017	1.88687	9.2e-05	0.282498	2.3e-05	0.001412	8.8e-05	-2.50269	0.813989	1436.05
RT_P57930 - 9	364.7	6.8	1.46731	0.00016	1.88688	9.2e-05	0.282442	2.7e-05	0.001165	1.7e-05	-4.29644	0.955565	1553.85
RT_P57930 - 10	358.5	7.4	1.46712	0.00013	1.88689	0.00011	0.282338	3.5e-05	0.00065	0.00021	-7.98839	1.23868	1780.85
RT_P57930 - 11	369.2	5.7	1.46719	0.00016	1.8869	0.00012	0.282523	3.2e-05	0.000947	3.1e-05	-1.27929	1.13253	1367.14
RT_P57930 - 12	514.5	9.1	1.46723	0.00012	1.88691	8.9e-05	0.282401	2.3e-05	0.0004228	5.4e-06	-2.25779	0.814273	1544.16
RT_P57930 - 13	359.1	6.1	1.46726	0.00011	1.8868	0.00011	0.282518	2.4e-05	0.00079	1.6e-05	-1.63823	0.84938	1381.8
RT_P57930 - 14	374.8	6.6	1.46735	0.00014	1.88683	9.9e-05	0.282562	2.6e-05	0.000624	6e-05	0.302932	0.920194	1271.53
RT_P57930 - 15	359.2	4.7	1.46717	0.00013	1.8869	0.0001	0.282519	3.1e-05	0.00093	0.00012	-1.634	1.09712	1381.61
RT_P57930 - 16	375.8	8.1	1.46711	0.00014	1.88682	0.00014	0.282532	2.4e-05	0.00079	2.1e-05	-0.778255	0.849412	1340.71
RT_P57930 - 17	370.2	8	1.46715	0.00014	1.8869	0.00012	0.282525	2.7e-05	0.00086	0.00013	-1.16542	0.955576	1360.74
RT_P57930 - 18	367.5	6.6	1.46713	0.00018	1.88671	0.00013	0.282558	3.6e-05	0.000897	4e-05	-0.0653265	1.27409	1289.04
RT_P57930 - 19	375.8	6.8	1.46721	0.00013	1.88715	8.3e-05	0.282513	3.1e-05	0.000685	1.8e-05	-1.42454	1.09716	1381.55
RT_P57930 - 20	367.6	7.5	1.46711	0.00016	1.88686	9e-05	0.282487	3.5e-05	0.00137	0.00011	-2.69123	1.2387	1455
RT_P57930 - 21	365	5.6	1.46704	0.00017	1.88683	9.6e-05	0.282525	3.4e-05	0.001303	5.4e-05	-1.38588	1.2033	1370.54
RT_P57930 - 22	229.3	6.6	1.46722	0.00014	1.88684	0.00011	0.282396	3.4e-05	0.00259	0.0001	-9.05604	1.20294	1745.08
RT_P57930 - 23	367.6	8.3	1.46697	0.00022	1.88693	0.0001	0.282563	2.6e-05	0.00109	0.00013	0.0667668	0.920179	1280.76
RT_P57930 - 24	363.5	5.8	1.46714	0.00014	1.88694	0.00011	0.282511	2.5e-05	0.0005162	4.8e-06	-1.72397	0.88478	1390.71
RT_P57930 - 25	382.3	6.6	1.46717	0.00017	1.88679	0.0001	0.282441	3.4e-05	0.001619	4.6e-05	-4.06725	1.20335	1553.39
RT_P57930 - 26	406	10	1.46714	0.00014	1.88685	9.7e-05	0.282401	3.7e-05	0.00116	0.0001	-4.85507	1.3096	1621.79
RT_P57930 - 27	379.3	5.9	1.46729	0.00015	1.887	0.00011	0.282392	3.2e-05	0.000261	5.2e-05	-5.52373	1.13256	1642.65
RT_P57930 - 28	382.3	9.6	1.46714	0.00011	1.88692	0.00012	0.282437	2.9e-05	0.001028	8e-05	-4.05899	1.02639	1552.87
RT_P57930 - 29	356.5	5.1	1.46724	0.00016	1.88684	9.8e-05	0.282533	3.6e-05	0.0010762	3.2e-06	-1.23175	1.27406	1354.06
RT_P57930 - 30	369.4	4.3	1.46715	0.00019	1.8869	8.6e-05	0.282498	3.8e-05	0.001757	6.2e-05	-2.35813	1.34488	1435.42
OU49111
RT_OU49111 - 1	344.4	4.6	1.46711	0.0002	1.88688	9.5e-05	0.282515	3.1e-05	0.001565	3.6e-05	-2.24204	1.09708	1408.25
RT_OU49111 - 2	345.4	4.7	1.46708	0.00018	1.88688	9.7e-05	0.282483	3.2e-05	0.001572	4.5e-05	-3.35482	1.13247	1479.22
RT_OU49111 - 3	351	3.6	1.46735	0.00016	1.88689	0.00011	0.28248	3e-05	0.002664	1.3e-05	-3.59584	1.06171	1498.85
RT_OU49111 - 4	342.5	3.9	1.46721	0.00013	1.88679	0.00012	0.282487	2.2e-05	0.002153	9.7e-05	-3.4069	0.77857	1480.2
RT_OU49111 - 5	351.8	7	1.46719	0.00017	1.88675	0.00011	0.282443	3.7e-05	0.001329	1.9e-05	-4.57748	1.30944	1561.3
RT_OU49111 - 6	330.6	4.1	1.46723	0.00012	1.88682	0.0001	0.282557	2.7e-05	0.001342	4.2e-05	-1.00072	0.955492	1318.91
RT_OU49111 - 7	349.3	5.5	1.46721	0.00013	1.88675	0.00011	0.28254	3.2e-05	0.001477	3.5e-05	-1.23255	1.13248	1348.4
RT_OU49111 - 8	352.9	5.6	1.46713	0.00017	1.88691	0.00011	0.282487	3e-05	0.001346	2.1e-05	-3.00069	1.06171	1462.85
RT_OU49111 - 9	341.8	5	1.46717	0.00015	1.88686	0.00011	0.282476	2.6e-05	0.001249	2.9e-05	-3.60601	0.920126	1492.19
RT_OU49111 - 10	346.6	4.4	1.46716	0.00012	1.88681	9.2e-05	0.282487	2.5e-05	0.001382	5.2e-05	-3.14406	0.884746	1466.89
RT_OU49111 - 11	346.6	5.2	1.46727	0.00016	1.88684	0.00011	0.282511	3e-05	0.001402	3.2e-05	-2.29929	1.0617	1413.61
RT_OU49111 - 12	356	7.6	1.46709	0.00023	1.88684	0.00012	0.282399	4e-05	0.001087	2.3e-05	-5.98745	1.41562	1653.3
RT_OU49111 - 13	334.7	4.9	1.46717	0.00018	1.88689	0.0001	0.282515	3.4e-05	0.00193	0.00019	-2.52958	1.20322	1418.7
RT_OU49111 - 14	360.9	8	1.46718	0.00016	1.88691	0.00013	0.28249	3.1e-05	0.0011	2.6e-05	-2.66407	1.09712	1447.97
RT_OU49111 - 15	339	4.4	1.46718	0.00014	1.88685	7.7e-05	0.282493	3.4e-05	0.00218	0.00019	-3.27379	1.20323	1469.04
RT_OU49111 - 16	340.1	3.4	1.46727	0.0002	1.88691	9.2e-05	0.282522	3.1e-05	0.00311	0.00021	-2.43417	1.09707	1416.96
RT_OU49111 - 17	339.1	4.9	1.4672	0.00017	1.88689	9.5e-05	0.282482	3.7e-05	0.001586	4.1e-05	-3.52748	1.3094	1485.1
RT_OU49111 - 18	350.7	5.9	1.46718	0.00021	1.88684	9.5e-05	0.282492	3.2e-05	0.001241	3.4e-05	-2.84651	1.13249	1451.38
RT_OU49111 - 19	343.9	6.9	1.4673	0.00012	1.88675	9.9e-05	0.282431	3.5e-05	0.00134	1.3e-05	-5.17413	1.23864	1592.57
RT_OU49111 - 20	341.7	8.2	1.46723	0.00016	1.88694	0.00012	0.282486	3.4e-05	0.00076	7.2e-05	-3.14351	1.20324	1462.97
RT_OU49111 - 21	361.1	5	1.46716	0.00014	1.88686	0.0001	0.282499	2.5e-05	0.00123	0.00013	-2.37235	0.884775	1429.73
RT_OU49111 - 22	335.3	3.8	1.46725	0.00018	1.88675	9e-05	0.282516	2.9e-05	0.002257	3.5e-05	-2.55423	1.02628	1420.73
RT_OU49111 - 23	357.2	8.7	1.46714	0.00022	1.88688	0.00012	0.282456	2.9e-05	0.001157	3.1e-05	-3.96082	1.02633	1526.77
RT_OU49111 - 24	338	5.5	1.46717	0.00017	1.88671	0.00011	0.282489	3.2e-05	0.00149	7.7e-05	-3.28165	1.13245	1468.74
RT_OU49111 - 25	346.2	5	1.46725	0.00015	1.88688	0.00011	0.282506	2.2e-05	0.000869	6.2e-05	-2.36249	0.778576	1417.28
P52247
RT_P52247 - 1	341.7	6.7	1.46719	0.00014	1.88682	0.00012	0.282493	2.6e-05	0.001225	7.1e-05	-3.00111	0.920126	1453.99
RT_P52247 - 2	338.1	7	1.46706	0.00016	1.88679	0.0001	0.282496	2.4e-05	0.001363	9.7e-05	-3.00334	0.84934	1451.27
RT_P52247 - 3	345.7	9.4	1.4671	0.00018	1.88688	0.00013	0.282561	3.2e-05	0.000858	2.1e-05	-0.424413	1.13247	1294.46
RT_P52247 - 4	335.4	3.6	1.46711	0.00018	1.88683	0.00011	0.28249	2.7e-05	0.001455	3.9e-05	-3.29397	0.955502	1467.45
RT_P52247 - 5	344.6	5.3	1.4672	0.00015	1.88673	0.00013	0.282507	2.4e-05	0.001347	1.3e-05	-2.4711	0.849353	1422.86
RT_P52247 - 6	345.6	5	1.4672	0.00019	1.88677	0.00012	0.282511	3e-05	0.001404	1.5e-05	-2.32116	1.06169	1414.2
RT_P52247 - 7	356.6	8.3	1.46711	0.00017	1.88683	0.00011	0.282518	2.6e-05	0.001196	6.6e-05	-1.78876	0.920157	1389.32
RT_P52247 - 8	341	11	1.46717	0.00015	1.8868	0.00014	0.282514	2.3e-05	0.000897	1.1e-05	-2.19886	0.813956	1402.83
RT_P52247 - 9	349.8	5.8	1.46709	0.00012	1.88685	0.00011	0.282547	2.4e-05	0.000992	1.9e-05	-0.861674	0.849363	1325.36
RT_P52247 - 10	351.2	6.3	1.46716	0.0002	1.88681	9.7e-05	0.282482	2.8e-05	0.001682	2.9e-05	-3.29232	0.990926	1479.89
RT_P52247 - 11	348.8	9.5	1.46711	0.00016	1.88691	0.00013	0.282526	3.2e-05	0.001146	5.1e-05	-1.66216	1.13248	1375.14
RT_P52247 - 12	340.7	7.9	1.46717	0.00015	1.88677	0.00011	0.282516	2.3e-05	0.001449	1.7e-05	-2.25925	0.813956	1406.4
RT_P52247 - 13	347.7	6.5	1.46722	0.00015	1.88686	0.00012	0.282506	2.5e-05	0.001388	6.8e-05	-2.44947	0.884749	1423.96
RT_P52247 - 14	346.1	5.8	1.46724	0.00013	1.88685	0.00011	0.282524	2.6e-05	0.00141	4.5e-05	-1.85177	0.920135	1384.97
RT_P52247 - 15	345.7	5.1	1.46722	0.00016	1.88689	0.00012	0.28252	3.1e-05	0.001128	3.1e-05	-1.93727	1.09708	1390.05
RT_P52247 - 16	364.6	6	1.46711	0.00016	1.88669	0.00011	0.282553	2.8e-05	0.001907	1.1e-05	-0.549528	0.990956	1317.37
RT_P52247 - 17	349.8	7.2	1.46712	0.00011	1.8868	9.5e-05	0.282525	2.5e-05	0.0011128	8.6e-06	-1.66827	0.884753	1376.32
RT_P52247 - 18	398	14	1.46717	0.00015	1.8868	0.0001	0.282302	3e-05	0.000739	6.8e-05	-8.42063	1.06182	1839.3
RT_P52247 - 19	350.7	4.1	1.46728	0.00014	1.88671	8.1e-05	0.282549	2.4e-05	0.001448	2.2e-05	-0.877389	0.849364	1327.07
RT_P52247 - 20	347	5.6	1.46725	0.00014	1.88682	8.4e-05	0.282527	3.4e-05	0.001185	5.5e-05	-1.67458	1.20326	1374.49
RT_P52247 - 21	356	5.8	1.46715	0.00017	1.88691	9.9e-05	0.282552	2.3e-05	0.001457	5.8e-05	-0.660012	0.813984	1317.53
RT_P52247 - 22	348.9	7.3	1.46708	0.00014	1.88685	0.00011	0.282553	2.2e-05	0.00081	4.2e-05	-0.626757	0.778581	1309.79
RT_P52247 - 23	356	6.1	1.4671	0.00013	1.88675	0.00012	0.282585	2.6e-05	0.001191	8.9e-05	0.570656	0.920156	1239.66
RT_P52247 - 24	351.4	5.2	1.4671	0.00014	1.88692	0.00012	0.28255	3.7e-05	0.0014088	7.2e-06	-0.8179	1.30944	1323.86
RT_P52247 - 25	354.5	4.3	1.46728	0.00015	1.88683	9.5e-05	0.282479	2.4e-05	0.00192	2.3e-05	-3.38439	0.849371	1488.31
OU49117
RT_OU49117 - 1	369.7	4.9	1.46714	0.00016	1.88693	0.00012	0.282849	2.6e-05	0.002251	5.5e-05	9.94962	0.920184	653.364
RT_OU49117 - 2	372.1	7.8	1.4672	0.00022	1.88692	0.00012	0.282797	3e-05	0.001047	4.4e-05	8.45641	1.06176	750.786
RT_OU49117 - 3	358.5	4.4	1.46717	0.00015	1.88689	9.9e-05	0.282827	2.7e-05	0.00196	2.8e-05	9.00636	0.955551	704.85
RT_OU49117 - 4	374.5	7.3	1.46705	0.00016	1.88696	0.00013	0.282813	3.7e-05	0.00131	0.00014	9.0094	1.30951	717.332
RT_OU49117 - 5	363.1	7.1	1.46718	0.00013	1.88681	0.00011	0.282889	3.1e-05	0.00134	0.00012	11.4468	1.09713	552.192
RT_OU49117 - 6	362.3	4	1.46723	0.00016	1.88687	0.0001	0.282767	2.9e-05	0.002077	7.5e-05	6.93484	1.02634	840.18
RT_OU49117 - 7	371.7	4.3	1.46704	0.00017	1.88686	0.00011	0.282851	3.6e-05	0.001769	3e-05	10.181	1.27411	640.134
RT_OU49117 - 8	368.6	5.5	1.46718	0.00013	1.8868	0.00014	0.282735	2.7e-05	0.002259	8.8e-05	5.89005	0.955573	911.786
RT_OU49117 - 9	381.1	6.7	1.4672	0.00015	1.88685	0.00011	0.282844	3.5e-05	0.001343	4.3e-05	10.2402	1.23874	643.786
RT_OU49117 - 10	366.3	3	1.46711	0.00012	1.88701	9.7e-05	0.282833	3e-05	0.002458	7.9e-05	9.26209	1.06174	694.672
RT_OU49117 - 11	343.9	3.9	1.46716	0.00015	1.8869	0.00011	0.282795	3.7e-05	0.002941	9.5e-05	7.34274	1.30942	799.568
RT_OU49117 - 12	366.2	5.9	1.46716	0.00019	1.88691	0.00016	0.282813	3.4e-05	0.00162	2.8e-05	8.75565	1.20331	726.982
RT_OU49117 - 13	1018	19	1.46722	0.00014	1.88693	9.7e-05	0.282074	2.7e-05	0.0008107	6.7e-06	-2.90085	0.956971	1983.34
RT_OU49117 - 14	363.7	4.4	1.46713	0.00019	1.88674	0.00013	0.282755	3.2e-05	0.002258	8.5e-05	6.49588	1.13252	869.286
RT_OU49117 - 15	376	5.7	1.46714	0.00018	1.88691	9.9e-05	0.282864	3e-05	0.001549	2.6e-05	10.7871	1.06177	604.707
RT_OU49117 - 16	360.9	3.5	1.46709	0.00016	1.88685	0.00012	0.282752	4.1e-05	0.00325	0.00025	6.09393	1.45103	892.691
RT_OU49117 - 17	372	5.1	1.46717	0.00015	1.88685	0.00011	0.282811	2.7e-05	0.002251	9e-05	8.65275	0.95558	738.157
RT_OU49117 - 18	372.9	7.8	1.46711	0.00015	1.88687	0.00011	0.282851	3.5e-05	0.001543	3.9e-05	10.2623	1.23872	635.876
RT_OU49117 - 19	363.3	3.4	1.4672	0.00011	1.8868	0.00011	0.282799	2.9e-05	0.00207	6.9e-05	8.09003	1.02634	767.225
RT_OU49117 - 20	338.4	3.8	1.4672	0.00016	1.88684	0.00012	0.282776	3.4e-05	0.00416	0.00019	6.28472	1.20323	862.695
RT_OU49117 - 21	858	11	1.46709	0.00018	1.8868	0.00012	0.282257	3.1e-05	0.0004057	1.6e-06	0.284031	1.09835	1655.43
P89651
RT_P89651 - 1	165.7	4.3	1.46717	0.00019	1.88678	0.00012	0.282738	3.2e-05	0.001268	1.7e-05	1.88119	1.13202	1005.62
RT_P89651 - 2	168.9	5	1.46717	0.00019	1.88671	0.00012	0.282771	2.6e-05	0.001298	1.5e-05	3.11381	0.919772	929.958
RT_P89651 - 3	169.6	5	1.46717	0.00017	1.88683	0.00011	0.282756	3.1e-05	0.001161	1.9e-05	2.61352	1.09665	962.266
RT_P89651 - 4	176	2.1	1.46717	0.00017	1.88691	0.0001	0.282726	2.7e-05	0.001477	1.8e-05	1.65304	0.955163	1028.26
RT_P89651 - 5	173.5	2.8	1.4673	0.00013	1.88684	0.00012	0.282758	2.3e-05	0.0013458	9.1e-06	2.74691	0.813652	956.897
RT_P89651 - 6	165.5	3.7	1.4673	0.00019	1.88688	0.00011	0.282745	2.3e-05	0.001266	2.9e-05	2.12476	0.813638	990.014
RT_P89651 - 7	163.6	2.3	1.46732	0.00017	1.88679	0.0001	0.282718	2.4e-05	0.001496	6.8e-05	1.10402	0.84901	1053.19
RT_P89651 - 8	169.2	2.2	1.46724	0.00016	1.88676	0.00012	0.282747	2.7e-05	0.001403	5.4e-05	2.25946	0.955148	984.409
RT_P89651 - 9	166	5.5	1.46713	0.00014	1.88688	0.00013	0.282729	2.8e-05	0.001193	1.8e-05	1.57748	0.990517	1025.1
RT_P89651 - 10	159.6	2.3	1.46717	0.00017	1.88679	0.0001	0.28273	3.4e-05	0.001932	3.7e-05	1.39742	1.20275	1031.43
RT_P89651 - 11	165.3	2.6	1.46714	0.00017	1.88685	0.00013	0.282761	3.2e-05	0.0010829	3e-06	2.7065	1.13202	952.952
RT_P89651 - 12	157.9	3.4	1.46735	0.00013	1.88684	9.1e-05	0.282728	2.8e-05	0.00153	0.00016	1.33299	0.990499	1034.16
RT_P89651 - 13	189	5.3	1.46719	0.00017	1.88681	0.00011	0.28272	2.6e-05	0.001099	1.3e-05	1.76486	0.919813	1031.49
RT_P89651 - 14	167.8	2.3	1.46719	0.00012	1.88685	0.0001	0.28275	3.3e-05	0.001091	2.3e-05	2.37034	1.1674	976.264
RT_P89651 - 15	509	11	1.46717	0.00017	1.88677	0.00013	0.282492	3.4e-05	0.001156	1.4e-05	0.594267	1.20369	1359.48
RT_P89651 - 16	166.9	3.5	1.46711	0.00016	1.88688	0.00012	0.282746	3.3e-05	0.0012664	7.6e-06	2.19009	1.1674	986.982
P52267
RT_P52267 - 1	297.4	5.1	1.46706	0.00017	1.88684	8.2e-05	0.282263	2.9e-05	0.000797	3.8e-05	-12.0084	1.02619	1983.69
RT_P52267 - 2	358.3	2.8	1.46729	0.00018	1.88682	0.00012	0.282258	3.4e-05	0.000314	1.2e-05	-10.7442	1.20329	1953.16
RT_P52267 - 3	317.9	2.5	1.46714	0.00017	1.8869	0.00011	0.282233	3.2e-05	0.000579	2.8e-05	-12.5779	1.1324	2035.5
RT_P52267 - 4	256.6	7.4	1.46702	0.00013	1.8869	7.9e-05	0.282248	3.1e-05	0.000532	4.7e-05	-13.3818	1.09687	2036.86
RT_P52267 - 5	198.7	3.8	1.46717	0.00011	1.88692	8.5e-05	0.282218	2.4e-05	0.000655	1.2e-05	-15.7276	0.849076	2136.7
RT_P52267 - 6	371.2	4.3	1.46714	0.00015	1.88689	0.00011	0.282272	3e-05	0.00064	5.6e-05	-10.0436	1.06175	1919.61
RT_P52267 - 7	263.9	7.2	1.46721	0.00015	1.88686	8.7e-05	0.282234	2.5e-05	0.0005586	6e-06	-13.7218	0.884583	2063.84
RT_P52267 - 8	318.5	5.3	1.46721	0.00018	1.88679	9.6e-05	0.28221	3.1e-05	0.000449	1.1e-05	-13.3512	1.09702	2084.16
RT_P52267 - 9	299.9	3.5	1.46729	0.00015	1.88699	9.4e-05	0.28223	2.7e-05	0.001068	4.8e-05	-13.1756	0.955426	2058.44
RT_P52267 - 10	332.9	2.1	1.46728	0.00013	1.88685	9.8e-05	0.282221	3.4e-05	0.0006729	7.4e-06	-12.6944	1.20322	2054.68
RT_P52267 - 11	236.1	4.3	1.46714	0.00015	1.88684	7.2e-05	0.282234	2.9e-05	0.000745	4.3e-05	-14.3596	1.02605	2081.43
RT_P52267 - 12	391	10	1.46702	0.00017	1.88689	8.8e-05	0.282179	2.9e-05	0.000646	4.4e-05	-12.9029	1.02641	2113.84
[truncated: 1,813 more rows]

## Sheet: S3. SRM O-isotopes
O-isotope Analyses												Primary standard treated as unknown
[truncated: 806 more rows]

## Sheet: PlotDat4
Source sheet	S4. SRM Lu-Hf isotopes_1	0.3	0.282507	1	0.282527	3e-05
[truncated: 74 more rows]

[truncated: 6 more sheets: PlotDat5, PlotDat6, PlotDat7, S4. SRM Lu-Hf isotopes_1, S5. Sample location information, S6. Example of ICP-MS signal]
